# Supplementary material
Source: publisher figshare collection journal article supplement (https://gsajournals.figshare.com/ndownloader/files/20187279)
Supplement: Supplementary file 1 [file 20187279]

## Sheet: Overview
Event	Description					cbp80
AA	Alternative Acceptor splice site					168
AD	Alternative Donor splice site					199
CE	Core exon, which may be bounded by one or more alternative AA/AD notes					158
EI/XX	Whippet node (denoted by XX) contained within exitron coordinates. Separate nodes forming a complete exitron are highlighted in blue					83
RI	Retained intron					1456
Total						2064

## Sheet: cbp80
Gene	Node	Coord	Strand	Type	cbp80	wild-type	DeltaPsi	Probability	Complexity	Entropy	description	comp_description	IPR_domain	has SNP/indels?	SNPs/indels
AT1G01030	6	1:12355-12423	-	EI/RI	0.9537	0.80695	0.14675	0.913	K1	0.9044	AP2/B3-like transcriptional factor family protein	NGATHA3 (NGA3); CONTAINS InterPro DOMAIN/s: Transcriptional factor B3 (InterPro:IPR003340); BEST Arabidopsis thaliana protein match is: AP2/B3-like transcriptional factor family protein (TAIR:AT4G01500.1)	B3 DNA binding domain | DNA-binding pseudobarrel domain	NO
AT1G01030	6	1:12355-12423	-	RI	0.9537	0.80695	0.14675	0.913	K1	0.9044	AP2/B3-like transcriptional factor family protein	NGATHA3 (NGA3); CONTAINS InterPro DOMAIN/s: Transcriptional factor B3 (InterPro:IPR003340); BEST Arabidopsis thaliana protein match is: AP2/B3-like transcriptional factor family protein (TAIR:AT4G01500.1)	B3 DNA binding domain | DNA-binding pseudobarrel domain	NO
AT1G01040	30	1:28432-28707	+	RI	0.41525	0.61497	-0.19972	0.978	K1	0.9874	dicer-like 1	dicer-like 1 (DCL1); CONTAINS InterPro DOMAIN/s: Restriction endonuclease, type I, R subunit/Type III, Res subunit (InterPro:IPR006935), Double-stranded RNA-binding (InterPro:IPR001159), Argonaute/Dicer protein, PAZ (InterPro:IPR003100), Ribonuclease III (InterPro:IPR000999), Double-stranded RNA-binding-like (InterPro:IPR014720), DEAD-like helicase, N-terminal (InterPro:IPR014001), DNA/RNA helica…	Dicer dimerisation domain | Double-stranded RNA-binding domain | Helicase, C-terminal | Helicase, superfamily 1/2, ATP-binding domain | Helicase/UvrB domain | P-loop containing nucleoside triphosphate hydrolase | PAZ domain | Ribonuclease III | Ribonuclease III domain	NO
AT1G01240	4	1:100032-100110	+	RI	0.49	0.17739	0.31261	1	K3	1.2436		unknown protein; BEST Arabidopsis thaliana protein match is: unknown protein (TAIR:AT2G46550.1); INVOLVED IN: N-terminal protein myristoylation; EXPRESSED IN: 17 plant structures; EXPRESSED DURING: 11 growth stages		NO
AT1G01240	5	1:100111-100220	+	CE	0.49179	0.20684	0.28495	1	K3	1.2428		unknown protein; BEST Arabidopsis thaliana protein match is: unknown protein (TAIR:AT2G46550.1); INVOLVED IN: N-terminal protein myristoylation; EXPRESSED IN: 17 plant structures; EXPRESSED DURING: 11 growth stages		NO
AT1G01240	6	1:100221-100656	+	RI	0.45218	0.1203	0.33187	1	K3	1.392		unknown protein; BEST Arabidopsis thaliana protein match is: unknown protein (TAIR:AT2G46550.1); INVOLVED IN: N-terminal protein myristoylation; EXPRESSED IN: 17 plant structures; EXPRESSED DURING: 11 growth stages		NO
AT1G01290	9	1:115340-115481	+	RI	0.24002	0.57752	-0.3375	0.972	K2	1.0567	cofactor of nitrate reductase and xanthine dehydrogenase 3	cofactor of nitrate reductase and xanthine dehydrogenase 3 (CNX3); CONTAINS InterPro DOMAIN/s: Molybdopterin cofactor biosynthesis C (MoaC) domain (InterPro:IPR002820)	Molybdenum cofactor biosynthesis C | Molybdenum cofactor biosynthesis C, bacterial-type | Molybdopterin cofactor biosynthesis C (MoaC) domain	NO
AT1G01320	3	1:130150-130371	-	RI	0.91575	0.031737	0.88401	1	K1	0.5273	Tetratricopeptide repeat (TPR)-like superfamily protein	Tetratricopeptide repeat (TPR)-like superfamily protein; FUNCTIONS IN: binding; LOCATED IN: cellular_component unknown; EXPRESSED IN: 24 plant structures; EXPRESSED DURING: 14 growth stages; CONTAINS InterPro DOMAIN/s: Tetratricopeptide-like helical (InterPro:IPR011990), Tetratricopeptide repeat-containing (InterPro:IPR013026), Tetratricopeptide repeat (InterPro:IPR019734); BEST Arabidopsis thali…	Clustered mitochondria protein, N-terminal | GSKIP domain | Tetratricopeptide repeat | Tetratricopeptide repeat-containing domain | Tetratricopeptide-like helical domain	NO
AT1G01490	4	1:182136-182252	-	RI	0.91671	0.74196	0.17475	0.943	K1	0.982	Heavy metal transport/detoxification superfamily protein	Heavy metal transport/detoxification superfamily protein ; FUNCTIONS IN: metal ion binding; INVOLVED IN: metal ion transport; LOCATED IN: cellular_component unknown; EXPRESSED IN: 22 plant structures; EXPRESSED DURING: 14 growth stages; CONTAINS InterPro DOMAIN/s: Heavy metal transport/detoxification protein (InterPro:IPR006121); BEST Arabidopsis thaliana protein match is: Heavy metal transport/d…	Heavy metal-associated domain, HMA	NO
AT1G01550	5	1:199764-199889	+	RI	0.29109	0.093292	0.19779	1	K1	0.8885	Protein of unknown function (DUF793)	BYPASS 1 (BPS1); FUNCTIONS IN: molecular_function unknown; LOCATED IN: plasma membrane; EXPRESSED IN: 24 plant structures; EXPRESSED DURING: 13 growth stages; CONTAINS InterPro DOMAIN/s: Protein BYPASS related (InterPro:IPR008511); BEST Arabidopsis thaliana protein match is: unknown protein (TAIR:AT2G46080.1)	Protein BYPASS-related	NO
AT1G01650	4	1:237304-237503	-	RI	0.18962	0.029436	0.16019	1	K3	1.0455	SIGNAL PEPTIDE PEPTIDASE-LIKE 4	SIGNAL PEPTIDE PEPTIDASE-LIKE 4 (SPPL4); FUNCTIONS IN: peptidase activity, aspartic-type endopeptidase activity; INVOLVED IN: proteolysis; LOCATED IN: endomembrane system, integral to membrane; LOCATED IN: integral to membrane; EXPRESSED IN: 24 plant structures; EXPRESSED DURING: 13 growth stages; CONTAINS InterPro DOMAIN/s: Peptidase A22, presenilin signal peptide (InterPro:IPR006639), Peptidase…	Peptidase A22B, signal peptide peptidase | Presenilin/signal peptide peptidase | Protease-associated domain, PA	NO
AT1G01650	9	1:237024-237121	-	RI	0.13156	0.01336	0.1182	0.996	K3	1.0455	SIGNAL PEPTIDE PEPTIDASE-LIKE 4	SIGNAL PEPTIDE PEPTIDASE-LIKE 4 (SPPL4); FUNCTIONS IN: peptidase activity, aspartic-type endopeptidase activity; INVOLVED IN: proteolysis; LOCATED IN: endomembrane system, integral to membrane; LOCATED IN: integral to membrane; EXPRESSED IN: 24 plant structures; EXPRESSED DURING: 13 growth stages; CONTAINS InterPro DOMAIN/s: Peptidase A22, presenilin signal peptide (InterPro:IPR006639), Peptidase…	Peptidase A22B, signal peptide peptidase | Presenilin/signal peptide peptidase | Protease-associated domain, PA	NO
AT1G01710	24	1:267282-267289	+	AA	0.95309	0.83545	0.11764	0.982	K3	1.9631	Acyl-CoA thioesterase family protein	Acyl-CoA thioesterase family protein; FUNCTIONS IN: cyclic nucleotide binding, acyl-CoA thioesterase activity; INVOLVED IN: acyl-CoA metabolic process; LOCATED IN: peroxisome; EXPRESSED IN: 22 plant structures; EXPRESSED DURING: 14 growth stages; CONTAINS InterPro DOMAIN/s: Cyclic nucleotide-binding (InterPro:IPR000595), Cyclic nucleotide-binding-like (InterPro:IPR018490), Acyl-CoA thioesterase (…	Acyl-CoA thioesterase | Cyclic nucleotide-binding domain | Cyclic nucleotide-binding-like | HotDog domain | RmlC-like jelly roll fold	NO
AT1G01750	4	1:275531-275631	+	RI	0.13204	0.33385	-0.2018	0.961	K1	0.9957	actin depolymerizing factor 11	actin depolymerizing factor 11 (ADF11); FUNCTIONS IN: actin binding; INVOLVED IN: biological_process unknown; LOCATED IN: intracellular; EXPRESSED IN: 6 plant structures; EXPRESSED DURING: 4 anthesis, petal differentiation and expansion stage; CONTAINS InterPro DOMAIN/s: Actin-binding, cofilin/tropomyosin type (InterPro:IPR002108); BEST Arabidopsis thaliana protein match is: actin depolymerizing …	ADF-H/Gelsolin-like domain | ADF/Cofilin/Destrin | Actin-depolymerising factor homology domain	NO
AT1G01750	7	1:275898-275972	+	RI	0.071568	0.37605	-0.30448	1	K1	0.9993	actin depolymerizing factor 11	actin depolymerizing factor 11 (ADF11); FUNCTIONS IN: actin binding; INVOLVED IN: biological_process unknown; LOCATED IN: intracellular; EXPRESSED IN: 6 plant structures; EXPRESSED DURING: 4 anthesis, petal differentiation and expansion stage; CONTAINS InterPro DOMAIN/s: Actin-binding, cofilin/tropomyosin type (InterPro:IPR002108); BEST Arabidopsis thaliana protein match is: actin depolymerizing …	ADF-H/Gelsolin-like domain | ADF/Cofilin/Destrin | Actin-depolymerising factor homology domain	NO
AT1G01790	16	1:286925-286996	+	AA	0.28653	0.18338	0.10315	0.923	K1	0.9114	K+ efflux antiporter 1	K+ efflux antiporter 1 (KEA1); FUNCTIONS IN: potassium:hydrogen antiporter activity, potassium ion transmembrane transporter activity; INVOLVED IN: potassium ion transport, cation transport, metabolic process, transmembrane transport; LOCATED IN: chloroplast, chloroplast envelope; EXPRESSED IN: 23 plant structures; EXPRESSED DURING: 15 growth stages; CONTAINS InterPro DOMAIN/s: K+/H+ exchanger (I…	Cation/H+ exchanger | K+/H+ exchanger | NAD(P)-binding domain | Regulator of K+ conductance, N-terminal	NO
AT1G02020	3	1:354122-354212	-	EI/RI	0.89512	0.69506	0.20006	0.963	K1	0.9877	nitroreductase family protein	nitroreductase family protein; FUNCTIONS IN: oxidoreductase activity, acting on NADH or NADPH, nitrogenous group as acceptor, oxidoreductase activity; INVOLVED IN: metabolic process; LOCATED IN: chloroplast; EXPRESSED IN: 23 plant structures; EXPRESSED DURING: 13 growth stages; CONTAINS InterPro DOMAIN/s: Nitroreductase-like (InterPro:IPR000415)	Nitroreductase | Nitroreductase-like	NO
AT1G02020	3	1:354122-354212	-	RI	0.89512	0.69506	0.20006	0.963	K1	0.9877	nitroreductase family protein	nitroreductase family protein; FUNCTIONS IN: oxidoreductase activity, acting on NADH or NADPH, nitrogenous group as acceptor, oxidoreductase activity; INVOLVED IN: metabolic process; LOCATED IN: chloroplast; EXPRESSED IN: 23 plant structures; EXPRESSED DURING: 13 growth stages; CONTAINS InterPro DOMAIN/s: Nitroreductase-like (InterPro:IPR000415)	Nitroreductase | Nitroreductase-like	NO
AT1G02050	2	1:360444-360722	-	RI	0.82132	0.63841	0.18291	0.931	K1	0.9569	Chalcone and stilbene synthase family protein	LESS ADHESIVE POLLEN 6 (LAP6); FUNCTIONS IN: transferase activity, transferring acyl groups other than amino-acyl groups, catalytic activity, acyltransferase activity; INVOLVED IN: phenylpropanoid biosynthetic process, pollen exine formation; EXPRESSED IN: 11 plant structures; EXPRESSED DURING: 6 growth stages; CONTAINS InterPro DOMAIN/s: Chalcone/stilbene synthase, N-terminal (InterPro:IPR001099…	Chalcone/stilbene synthase, C-terminal | Chalcone/stilbene synthase, N-terminal | Polyketide synthase, type III | Thiolase-like | Thiolase-like, subgroup	NO
AT1G02145	23	1:406519-406720	+	RI	0.11725	0.22499	-0.10774	0.946	K6	1.425	homolog of asparagine-linked glycosylation 12	homolog of asparagine-linked glycosylation 12 (ALG12); FUNCTIONS IN: alpha-1,6-mannosyltransferase activity; INVOLVED IN: ER-associated protein catabolic process, protein amino acid terminal N-glycosylation; LOCATED IN: endomembrane system, intrinsic to endoplasmic reticulum membrane; LOCATED IN: intrinsic to endoplasmic reticulum membrane; CONTAINS InterPro DOMAIN/s: Alg9-like mannosyltransferas…	GPI mannosyltransferase	NO
AT1G02750	8	1:603679-603774	+	RI	0.23286	0.11241	0.12045	0.912	K1	0.8423	Drought-responsive family protein	Drought-responsive family protein; FUNCTIONS IN: zinc ion binding; INVOLVED IN: response to water deprivation; EXPRESSED IN: 22 plant structures; EXPRESSED DURING: 13 growth stages; LOCATED IN: intracellular; CONTAINS InterPro DOMAIN/s: Drought induced 19/ RING finger protein 114 (InterPro:IPR008598); BEST Arabidopsis thaliana protein match is: Drought-responsive family protein (TAIR:AT4G02200.1)…	Drought induced 19 protein-like, zinc-binding domain | Protein dehydration-induced 19, C-terminal | Zinc finger, C2H2-like	NO
AT1G02840	16	1:627735-627747	+	AD	0.34529	0.99923	-0.65395	1	K1	0.9517	RNA-binding (RRM/RBD/RNP motifs) family protein	SR1; FUNCTIONS IN: RNA binding, nucleotide binding, nucleic acid binding; LOCATED IN: interchromatin granule, nuclear speck, nucleus; EXPRESSED IN: 25 plant structures; EXPRESSED DURING: 15 growth stages; CONTAINS InterPro DOMAIN/s: RNA recognition motif, RNP-1 (InterPro:IPR000504), Nucleotide-binding, alpha-beta plait (InterPro:IPR012677); BEST Arabidopsis thaliana protein match is: RNA-binding …	Nucleotide-binding, alpha-beta plait | RNA recognition motif domain	YES	1:627736:C-T;protein_coding;stop-gain;CAA>TAA;Q>*
AT1G02840	24	1:628777-628856	+	CE	0.6706	0.46815	0.20245	0.996	K4	2.4217	RNA-binding (RRM/RBD/RNP motifs) family protein	SR1; FUNCTIONS IN: RNA binding, nucleotide binding, nucleic acid binding; LOCATED IN: interchromatin granule, nuclear speck, nucleus; EXPRESSED IN: 25 plant structures; EXPRESSED DURING: 15 growth stages; CONTAINS InterPro DOMAIN/s: RNA recognition motif, RNP-1 (InterPro:IPR000504), Nucleotide-binding, alpha-beta plait (InterPro:IPR012677); BEST Arabidopsis thaliana protein match is: RNA-binding …	Nucleotide-binding, alpha-beta plait | RNA recognition motif domain	NO
AT1G02840	26	1:628935-628945	+	AA	0.54864	0.36345	0.18519	0.998	K4	2.4217	RNA-binding (RRM/RBD/RNP motifs) family protein	SR1; FUNCTIONS IN: RNA binding, nucleotide binding, nucleic acid binding; LOCATED IN: interchromatin granule, nuclear speck, nucleus; EXPRESSED IN: 25 plant structures; EXPRESSED DURING: 15 growth stages; CONTAINS InterPro DOMAIN/s: RNA recognition motif, RNP-1 (InterPro:IPR000504), Nucleotide-binding, alpha-beta plait (InterPro:IPR012677); BEST Arabidopsis thaliana protein match is: RNA-binding …	Nucleotide-binding, alpha-beta plait | RNA recognition motif domain	NO
AT1G02840	27	1:628946-629287	+	AA	0.70294	0.4731	0.22984	0.999	K4	2.4217	RNA-binding (RRM/RBD/RNP motifs) family protein	SR1; FUNCTIONS IN: RNA binding, nucleotide binding, nucleic acid binding; LOCATED IN: interchromatin granule, nuclear speck, nucleus; EXPRESSED IN: 25 plant structures; EXPRESSED DURING: 15 growth stages; CONTAINS InterPro DOMAIN/s: RNA recognition motif, RNP-1 (InterPro:IPR000504), Nucleotide-binding, alpha-beta plait (InterPro:IPR012677); BEST Arabidopsis thaliana protein match is: RNA-binding …	Nucleotide-binding, alpha-beta plait | RNA recognition motif domain	NO
AT1G02960	22	1:667438-667464	-	AA	0.63589	0.77561	-0.13972	0.984	K3	2.7842		unknown protein; LOCATED IN: cellular_component unknown; EXPRESSED IN: 23 plant structures; EXPRESSED DURING: 13 growth stages; BEST Arabidopsis thaliana protein match is: unknown protein (TAIR:AT1G02965.1)		NO
AT1G03100	4	1:746232-746304	-	EI/RI	0.7895	0.48023	0.30927	0.934	K1	1	Pentatricopeptide repeat (PPR) superfamily protein	Pentatricopeptide repeat (PPR) superfamily protein; CONTAINS InterPro DOMAIN/s: Pentatricopeptide repeat (InterPro:IPR002885); BEST Arabidopsis thaliana protein match is: Pentatricopeptide repeat (PPR) superfamily protein (TAIR:AT4G17616.1)	Pentatricopeptide repeat | Tetratricopeptide-like helical domain	NO
AT1G03100	4	1:746232-746304	-	RI	0.7895	0.48023	0.30927	0.934	K1	1	Pentatricopeptide repeat (PPR) superfamily protein	Pentatricopeptide repeat (PPR) superfamily protein; CONTAINS InterPro DOMAIN/s: Pentatricopeptide repeat (InterPro:IPR002885); BEST Arabidopsis thaliana protein match is: Pentatricopeptide repeat (PPR) superfamily protein (TAIR:AT4G17616.1)	Pentatricopeptide repeat | Tetratricopeptide-like helical domain	NO
AT1G03180	9	1:773692-774095	+	RI	0.091183	0.30135	-0.21017	0.966	K1	0.9427		unknown protein; FUNCTIONS IN: molecular_function unknown; INVOLVED IN: biological_process unknown; LOCATED IN: mitochondrion; EXPRESSED IN: 15 plant structures; EXPRESSED DURING: 8 growth stages		NO
AT1G03290	4	1:807511-807591	+	RI	0.68805	0.49489	0.19316	0.925	K4	2.1918		unknown protein; FUNCTIONS IN: molecular_function unknown; INVOLVED IN: biological_process unknown; LOCATED IN: cellular_component unknown; EXPRESSED IN: 22 plant structures; EXPRESSED DURING: 13 growth stages; BEST Arabidopsis thaliana protein match is: unknown protein (TAIR:AT4G02880.2)		NO
AT1G03290	5	1:807592-807631	+	CE	0.74025	0.52724	0.21301	0.937	K4	2.1826		unknown protein; FUNCTIONS IN: molecular_function unknown; INVOLVED IN: biological_process unknown; LOCATED IN: cellular_component unknown; EXPRESSED IN: 22 plant structures; EXPRESSED DURING: 13 growth stages; BEST Arabidopsis thaliana protein match is: unknown protein (TAIR:AT4G02880.2)		NO
AT1G03290	6	1:807632-807950	+	RI	0.36317	0.040684	0.32249	1	K4	2.1918		unknown protein; FUNCTIONS IN: molecular_function unknown; INVOLVED IN: biological_process unknown; LOCATED IN: cellular_component unknown; EXPRESSED IN: 22 plant structures; EXPRESSED DURING: 13 growth stages; BEST Arabidopsis thaliana protein match is: unknown protein (TAIR:AT4G02880.2)		NO
AT1G03310	3	1:813605-813928	+	RI	0.58059	0.04884	0.53175	1	K2	1.5376	debranching enzyme 1	debranching enzyme 1 (DBE1); FUNCTIONS IN: isoamylase activity, alpha-amylase activity; INVOLVED IN: carbohydrate metabolic process, amylopectin biosynthetic process; LOCATED IN: chloroplast; EXPRESSED IN: 22 plant structures; EXPRESSED DURING: 13 growth stages; CONTAINS InterPro DOMAIN/s: Glycoside hydrolase, family 13, N-terminal (InterPro:IPR004193), Immunoglobulin E-set (InterPro:IPR014756), …	Glycoside hydrolase, catalytic domain | Glycoside hydrolase, family 13 | Glycoside hydrolase, family 13, N-terminal | Glycoside hydrolase, superfamily | Glycosyl hydrolase, family 13, all-beta | Glycosyl hydrolase, family 13, catalytic domain | Immunoglobulin E-set | Immunoglobulin-like fold	NO
AT1G03550	15	1:886696-886702	-	AD	0.83667	0.6079	0.22877	0.948	K1	0.9852	Secretory carrier membrane protein (SCAMP) family protein	Secretory carrier membrane protein (SCAMP) family protein; FUNCTIONS IN: transmembrane transporter activity; INVOLVED IN: protein transport; LOCATED IN: integral to membrane; EXPRESSED IN: 23 plant structures; EXPRESSED DURING: 15 growth stages; CONTAINS InterPro DOMAIN/s: SCAMP (InterPro:IPR007273); BEST Arabidopsis thaliana protein match is: Secretory carrier membrane protein (SCAMP) family pro…	SCAMP	NO
AT1G03550	16	1:886600-886608	-	AA	0.17921	0.39875	-0.21954	0.914	K1	0.9852	Secretory carrier membrane protein (SCAMP) family protein	Secretory carrier membrane protein (SCAMP) family protein; FUNCTIONS IN: transmembrane transporter activity; INVOLVED IN: protein transport; LOCATED IN: integral to membrane; EXPRESSED IN: 23 plant structures; EXPRESSED DURING: 15 growth stages; CONTAINS InterPro DOMAIN/s: SCAMP (InterPro:IPR007273); BEST Arabidopsis thaliana protein match is: Secretory carrier membrane protein (SCAMP) family pro…	SCAMP	NO
AT1G03550	21	1:886461-886553	-	RI	0.23505	0.46519	-0.23014	0.925	K1	0.999	Secretory carrier membrane protein (SCAMP) family protein	Secretory carrier membrane protein (SCAMP) family protein; FUNCTIONS IN: transmembrane transporter activity; INVOLVED IN: protein transport; LOCATED IN: integral to membrane; EXPRESSED IN: 23 plant structures; EXPRESSED DURING: 15 growth stages; CONTAINS InterPro DOMAIN/s: SCAMP (InterPro:IPR007273); BEST Arabidopsis thaliana protein match is: Secretory carrier membrane protein (SCAMP) family pro…	SCAMP	YES	1:886544:G-GT;exonic_variant
AT1G03550	23	1:886245-886392	-	RI	0.11538	0.2276	-0.11222	0.946	K1	0.7706	Secretory carrier membrane protein (SCAMP) family protein	Secretory carrier membrane protein (SCAMP) family protein; FUNCTIONS IN: transmembrane transporter activity; INVOLVED IN: protein transport; LOCATED IN: integral to membrane; EXPRESSED IN: 23 plant structures; EXPRESSED DURING: 15 growth stages; CONTAINS InterPro DOMAIN/s: SCAMP (InterPro:IPR007273); BEST Arabidopsis thaliana protein match is: Secretory carrier membrane protein (SCAMP) family pro…	SCAMP	NO
AT1G03550	25	1:886101-886195	-	RI	0.10793	0.26738	-0.15946	0.972	K1	0.8905	Secretory carrier membrane protein (SCAMP) family protein	Secretory carrier membrane protein (SCAMP) family protein; FUNCTIONS IN: transmembrane transporter activity; INVOLVED IN: protein transport; LOCATED IN: integral to membrane; EXPRESSED IN: 23 plant structures; EXPRESSED DURING: 15 growth stages; CONTAINS InterPro DOMAIN/s: SCAMP (InterPro:IPR007273); BEST Arabidopsis thaliana protein match is: Secretory carrier membrane protein (SCAMP) family pro…	SCAMP	NO
AT1G03590	3	1:897222-897355	-	AD	0.17741	0.052676	0.12474	0.977	K1	0.6962	Protein phosphatase 2C family protein	Protein phosphatase 2C family protein; FUNCTIONS IN: protein serine/threonine phosphatase activity, catalytic activity; INVOLVED IN: N-terminal protein myristoylation; LOCATED IN: plasma membrane; EXPRESSED IN: 23 plant structures; EXPRESSED DURING: 13 growth stages; CONTAINS InterPro DOMAIN/s: Protein phosphatase 2C-related (InterPro:IPR001932), Protein phosphatase 2C (InterPro:IPR015655), Prote…	Protein phosphatase 2C | Protein phosphatase 2C (PP2C)-like domain	NO
AT1G03590	4	1:896483-897221	-	RI	0.45998	0.056811	0.40317	1	K2	1.0544	Protein phosphatase 2C family protein	Protein phosphatase 2C family protein; FUNCTIONS IN: protein serine/threonine phosphatase activity, catalytic activity; INVOLVED IN: N-terminal protein myristoylation; LOCATED IN: plasma membrane; EXPRESSED IN: 23 plant structures; EXPRESSED DURING: 13 growth stages; CONTAINS InterPro DOMAIN/s: Protein phosphatase 2C-related (InterPro:IPR001932), Protein phosphatase 2C (InterPro:IPR015655), Prote…	Protein phosphatase 2C | Protein phosphatase 2C (PP2C)-like domain	NO
AT1G03935	2	1:1008865-1008962	+	RI	0.93306	0.7375	0.19556	0.981	K1	0.8752	snoRNA	snoRNA		NO
AT1G03960	13	1:1014635-1014676	+	CE	0.38197	0.57073	-0.18876	0.939	K1	0.9916	Calcium-binding EF hand family protein	Calcium-binding EF hand family protein; FUNCTIONS IN: calcium ion binding; INVOLVED IN: biological_process unknown; LOCATED IN: cellular_component unknown; EXPRESSED IN: 22 plant structures; EXPRESSED DURING: 14 growth stages; CONTAINS InterPro DOMAIN/s: EF-Hand 1, calcium-binding site (InterPro:IPR018247), EF-HAND 2 (InterPro:IPR018249), EF-hand-like domain (InterPro:IPR011992); BEST Arabidopsis…	EF-Hand 1, calcium-binding site | EF-hand domain | EF-hand domain pair	NO
AT1G04120	4	1:1070495-1070687	-	RI	0.47174	0.037095	0.43465	1	K2	0.998	multidrug resistance-associated protein 5	multidrug resistance-associated protein 5 (MRP5); CONTAINS InterPro DOMAIN/s: ATPase, AAA+ type, core (InterPro:IPR003593), ABC transporter-like (InterPro:IPR003439), ABC transporter integral membrane type 1 (InterPro:IPR017940), ABC transporter, transmembrane domain, type 1 (InterPro:IPR011527), ABC transporter, transmembrane domain (InterPro:IPR001140), ABC transporter, conserved site (InterPro…	AAA+ ATPase domain | ABC transporter type 1, transmembrane domain | ABC transporter, conserved site | ABC transporter, transmembrane domain | ABC transporter-like | P-loop containing nucleoside triphosphate hydrolase	NO
AT1G04200	14	1:1110820-1110982	+	RI	0.096884	0.19911	-0.10222	0.904	K2	0.7974		FUNCTIONS IN: molecular_function unknown; INVOLVED IN: N-terminal protein myristoylation; LOCATED IN: cellular_component unknown; EXPRESSED IN: 22 plant structures; EXPRESSED DURING: 13 growth stages; CONTAINS InterPro DOMAIN/s: Dymeclin (InterPro:IPR019142)	Dymeclin	NO
AT1G04280	5	1:1146464-1146522	-	AD	0.46377	0.1858	0.27797	0.98	K2	1.3358	P-loop containing nucleoside triphosphate hydrolases superfamily protein	P-loop containing nucleoside triphosphate hydrolases superfamily protein; FUNCTIONS IN: ATP binding; INVOLVED IN: cell killing; LOCATED IN: membrane; EXPRESSED IN: leaf; CONTAINS InterPro DOMAIN/s: Zeta toxin (InterPro:IPR010488); BEST Arabidopsis thaliana protein match is: P-loop containing nucleoside triphosphate hydrolases superfamily protein (TAIR:AT1G06750.2)	P-loop containing nucleoside triphosphate hydrolase | Zeta toxin domain	NO
AT1G04280	6	1:1146375-1146463	-	RI	0.35448	0.16528	0.1892	0.963	K3	1.4561	P-loop containing nucleoside triphosphate hydrolases superfamily protein	P-loop containing nucleoside triphosphate hydrolases superfamily protein; FUNCTIONS IN: ATP binding; INVOLVED IN: cell killing; LOCATED IN: membrane; EXPRESSED IN: leaf; CONTAINS InterPro DOMAIN/s: Zeta toxin (InterPro:IPR010488); BEST Arabidopsis thaliana protein match is: P-loop containing nucleoside triphosphate hydrolases superfamily protein (TAIR:AT1G06750.2)	P-loop containing nucleoside triphosphate hydrolase | Zeta toxin domain	NO
AT1G04280	7	1:1146372-1146374	-	AA	0.99115	0.87845	0.1127	0.99	K2	1.3358	P-loop containing nucleoside triphosphate hydrolases superfamily protein	P-loop containing nucleoside triphosphate hydrolases superfamily protein; FUNCTIONS IN: ATP binding; INVOLVED IN: cell killing; LOCATED IN: membrane; EXPRESSED IN: leaf; CONTAINS InterPro DOMAIN/s: Zeta toxin (InterPro:IPR010488); BEST Arabidopsis thaliana protein match is: P-loop containing nucleoside triphosphate hydrolases superfamily protein (TAIR:AT1G06750.2)	P-loop containing nucleoside triphosphate hydrolase | Zeta toxin domain	NO
AT1G04300	32	1:1149997-1150117	-	RI	0.035506	0.13676	-0.10125	0.998	K1	0.6487	TRAF-like superfamily protein	TRAF-like superfamily protein; CONTAINS InterPro DOMAIN/s: TRAF-like (InterPro:IPR008974), MATH (InterPro:IPR002083), TRAF-type (InterPro:IPR013322); FUNCTIONS IN: molecular_function unknown; INVOLVED IN: biological_process unknown; EXPRESSED IN: 24 plant structures; LOCATED IN: endomembrane system; EXPRESSED DURING: 15 growth stages; CONTAINS InterPro DOMAIN/s: TRAF-like (InterPro:IPR008974), MA…	MATH | TRAF-like	NO
AT1G04310	4	1:1157546-1157650	-	AD	0.45419	0.65993	-0.20574	0.998	K2	1.4522	ethylene response sensor 2	ethylene response sensor 2 (ERS2); FUNCTIONS IN: ethylene binding, protein histidine kinase activity, receptor activity, glycogen synthase kinase 3 activity; INVOLVED IN: negative regulation of ethylene mediated signaling pathway; LOCATED IN: endomembrane system, membrane; EXPRESSED IN: 22 plant structures; EXPRESSED DURING: 9 growth stages; CONTAINS InterPro DOMAIN/s: Signal transduction histidi…	GAF domain | GAF domain-like | Signal transduction histidine kinase EnvZ-like, dimerisation/phosphoacceptor domain | Signal transduction histidine kinase, homodimeric domain	NO
AT1G04310	5	1:1157140-1157545	-	RI	0.19836	0.041772	0.15659	0.997	K2	1.4522	ethylene response sensor 2	ethylene response sensor 2 (ERS2); FUNCTIONS IN: ethylene binding, protein histidine kinase activity, receptor activity, glycogen synthase kinase 3 activity; INVOLVED IN: negative regulation of ethylene mediated signaling pathway; LOCATED IN: endomembrane system, membrane; EXPRESSED IN: 22 plant structures; EXPRESSED DURING: 9 growth stages; CONTAINS InterPro DOMAIN/s: Signal transduction histidi…	GAF domain | GAF domain-like | Signal transduction histidine kinase EnvZ-like, dimerisation/phosphoacceptor domain | Signal transduction histidine kinase, homodimeric domain	NO
AT1G04430	5	1:1198327-1198637	+	AD	0.17308	0.070024	0.10306	0.906	K2	0.8983	S-adenosyl-L-methionine-dependent methyltransferases superfamily protein	S-adenosyl-L-methionine-dependent methyltransferases superfamily protein; INVOLVED IN: biological_process unknown; LOCATED IN: Golgi apparatus, plasma membrane; EXPRESSED IN: 26 plant structures; EXPRESSED DURING: 15 growth stages; CONTAINS InterPro DOMAIN/s: Protein of unknown function DUF248, methyltransferase putative (InterPro:IPR004159); BEST Arabidopsis thaliana protein match is: S-adenosyl…	Putative S-adenosyl-L-methionine-dependent methyltransferase | S-adenosyl-L-methionine-dependent methyltransferase-like	NO
AT1G04430	7	1:1198682-1198787	+	RI	0.24555	0.066113	0.17944	0.995	K2	1.1276	S-adenosyl-L-methionine-dependent methyltransferases superfamily protein	S-adenosyl-L-methionine-dependent methyltransferases superfamily protein; INVOLVED IN: biological_process unknown; LOCATED IN: Golgi apparatus, plasma membrane; EXPRESSED IN: 26 plant structures; EXPRESSED DURING: 15 growth stages; CONTAINS InterPro DOMAIN/s: Protein of unknown function DUF248, methyltransferase putative (InterPro:IPR004159); BEST Arabidopsis thaliana protein match is: S-adenosyl…	Putative S-adenosyl-L-methionine-dependent methyltransferase | S-adenosyl-L-methionine-dependent methyltransferase-like	NO
AT1G04910	5	1:1390426-1390450	-	AD	0.35868	0.46508	-0.1064	0.949	K1	0.9983	O-fucosyltransferase family protein	O-fucosyltransferase family protein; CONTAINS InterPro DOMAIN/s: GDP-fucose protein O-fucosyltransferase (InterPro:IPR019378); BEST Arabidopsis thaliana protein match is: O-fucosyltransferase family protein (TAIR:AT1G22460.1)	GDP-fucose protein O-fucosyltransferase | O-fucosyltransferase, plant	NO
AT1G05160	3	1:1489945-1489953	-	AA	0.79198	0.60624	0.18574	0.926	K2	1.5073	cytochrome P450, family 88, subfamily A, polypeptide 3	cytochrome P450, family 88, subfamily A, polypeptide 3 (CYP88A3); CONTAINS InterPro DOMAIN/s: Cytochrome P450, B-class (InterPro:IPR002397), Cytochrome P450 (InterPro:IPR001128), Cytochrome P450, conserved site (InterPro:IPR017972); BEST Arabidopsis thaliana protein match is: ent-kaurenoic acid hydroxylase 2 (TAIR:AT2G32440.2)	Cytochrome P450 | Cytochrome P450, B-class | Cytochrome P450, conserved site	NO
AT1G05200	11	1:1507886-1507917	+	CE	0.87145	0.98898	-0.11752	1	K3	1.8022	glutamate receptor 3.4	glutamate receptor 3.4 (GLR3.4); FUNCTIONS IN: protein binding, intracellular ligand-gated ion channel activity; INVOLVED IN: cellular calcium ion homeostasis, response to light stimulus; LOCATED IN: integral to membrane, membrane; EXPRESSED IN: 20 plant structures; EXPRESSED DURING: 13 growth stages; CONTAINS InterPro DOMAIN/s: Extracellular solute-binding protein, family 3 (InterPro:IPR001638),…	Extracellular ligand-binding receptor | Extracellular solute-binding protein, family 3 | Ionotropic glutamate receptor | Ionotropic glutamate receptor, plant | Periplasmic binding protein-like I	NO
AT1G05200	14	1:1507807-1507885	+	RI	0.19901	0.58428	-0.38527	1	K3	1.7315	glutamate receptor 3.4	glutamate receptor 3.4 (GLR3.4); FUNCTIONS IN: protein binding, intracellular ligand-gated ion channel activity; INVOLVED IN: cellular calcium ion homeostasis, response to light stimulus; LOCATED IN: integral to membrane, membrane; EXPRESSED IN: 20 plant structures; EXPRESSED DURING: 13 growth stages; CONTAINS InterPro DOMAIN/s: Extracellular solute-binding protein, family 3 (InterPro:IPR001638),…	Extracellular ligand-binding receptor | Extracellular solute-binding protein, family 3 | Ionotropic glutamate receptor | Ionotropic glutamate receptor, plant | Periplasmic binding protein-like I	NO
AT1G05200	20	1:1508438-1508528	+	RI	0.066946	0.16735	-0.1004	0.987	K1	0.7547	glutamate receptor 3.4	glutamate receptor 3.4 (GLR3.4); FUNCTIONS IN: protein binding, intracellular ligand-gated ion channel activity; INVOLVED IN: cellular calcium ion homeostasis, response to light stimulus; LOCATED IN: integral to membrane, membrane; EXPRESSED IN: 20 plant structures; EXPRESSED DURING: 13 growth stages; CONTAINS InterPro DOMAIN/s: Extracellular solute-binding protein, family 3 (InterPro:IPR001638),…	Extracellular ligand-binding receptor | Extracellular solute-binding protein, family 3 | Ionotropic glutamate receptor | Ionotropic glutamate receptor, plant | Periplasmic binding protein-like I	NO
AT1G05200	7	1:1505463-1505537	+	RI	0.86104	0.028966	0.83207	1	K2	0.6175	glutamate receptor 3.4	glutamate receptor 3.4 (GLR3.4); FUNCTIONS IN: protein binding, intracellular ligand-gated ion channel activity; INVOLVED IN: cellular calcium ion homeostasis, response to light stimulus; LOCATED IN: integral to membrane, membrane; EXPRESSED IN: 20 plant structures; EXPRESSED DURING: 13 growth stages; CONTAINS InterPro DOMAIN/s: Extracellular solute-binding protein, family 3 (InterPro:IPR001638),…	Extracellular ligand-binding receptor | Extracellular solute-binding protein, family 3 | Ionotropic glutamate receptor | Ionotropic glutamate receptor, plant | Periplasmic binding protein-like I	NO
AT1G05320	9	1:1553894-1553949	+	CE	0.67838	0.20816	0.47021	1	K3	2.8509		FUNCTIONS IN: molecular_function unknown; INVOLVED IN: biological_process unknown; LOCATED IN: cellular_component unknown; EXPRESSED IN: fruit, egg cell; CONTAINS InterPro DOMAIN/s: Prefoldin (InterPro:IPR009053); BEST Arabidopsis thaliana protein match is: unknown protein (TAIR:AT2G32240.1)		NO
AT1G05380	4	1:1577149-1577221	+	RI	0.52145	0.20491	0.31654	0.945	K2	1.509	Acyl-CoA N-acyltransferase with RING/FYVE/PHD-type zinc finger protein	Acyl-CoA N-acyltransferase with RING/FYVE/PHD-type zinc finger protein; CONTAINS InterPro DOMAIN/s: Zinc finger, PHD-type (InterPro:IPR001965), Zinc finger, FYVE/PHD-type (InterPro:IPR011011), Acyl-CoA N-acyltransferase (InterPro:IPR016181), Zinc finger, PHD-finger (InterPro:IPR019787); BEST Arabidopsis thaliana protein match is: Acyl-CoA N-acyltransferase with RING/FYVE/PHD-type zinc finger prot…	Acyl-CoA N-acyltransferase | Zinc finger, FYVE/PHD-type | Zinc finger, PHD-finger | Zinc finger, PHD-type | Zinc finger, RING/FYVE/PHD-type	NO
AT1G05590	2	1:1669528-1669676	+	RI	0.3683	0.14218	0.22612	0.95	K2	1.1146	beta-hexosaminidase 2	beta-hexosaminidase 2 (HEXO2); FUNCTIONS IN: UDP-glucosyltransferase activity, hexosaminidase activity, beta-N-acetylhexosaminidase activity, hydrolase activity, hydrolyzing O-glycosyl compounds; INVOLVED IN: carbohydrate metabolic process; LOCATED IN: plasma membrane; EXPRESSED IN: 23 plant structures; EXPRESSED DURING: 13 growth stages; CONTAINS InterPro DOMAIN/s: Glycoside hydrolase, family 20…	Beta-hexosaminidase | Beta-hexosaminidase, eukaryotic type, N-terminal | Chitobiase/beta-hexosaminidase domain 2-like | Glycoside hydrolase family 20, catalytic core | Glycoside hydrolase, catalytic domain | Glycoside hydrolase, superfamily	NO
AT1G05710	13	1:1715843-1716063	+	RI	0.35074	0.16574	0.185	0.96	K3	2.0629	basic helix-loop-helix (bHLH) DNA-binding superfamily protein	basic helix-loop-helix (bHLH) DNA-binding superfamily protein; FUNCTIONS IN: sequence-specific DNA binding transcription factor activity; INVOLVED IN: response to ethylene stimulus, regulation of transcription; LOCATED IN: nucleus; EXPRESSED IN: 22 plant structures; EXPRESSED DURING: 13 growth stages; CONTAINS InterPro DOMAIN/s: Helix-loop-helix DNA-binding domain (InterPro:IPR001092), Helix-loop…	Myc-type, basic helix-loop-helix (bHLH) domain	NO
AT1G05710	14	1:1716064-1716080	+	CE	0.34764	0.16334	0.18429	0.95	K3	2.0629	basic helix-loop-helix (bHLH) DNA-binding superfamily protein	basic helix-loop-helix (bHLH) DNA-binding superfamily protein; FUNCTIONS IN: sequence-specific DNA binding transcription factor activity; INVOLVED IN: response to ethylene stimulus, regulation of transcription; LOCATED IN: nucleus; EXPRESSED IN: 22 plant structures; EXPRESSED DURING: 13 growth stages; CONTAINS InterPro DOMAIN/s: Helix-loop-helix DNA-binding domain (InterPro:IPR001092), Helix-loop…	Myc-type, basic helix-loop-helix (bHLH) domain	NO
AT1G05710	15	1:1716081-1716102	+	AD	0.33243	0.13887	0.19357	0.976	K3	2.0629	basic helix-loop-helix (bHLH) DNA-binding superfamily protein	basic helix-loop-helix (bHLH) DNA-binding superfamily protein; FUNCTIONS IN: sequence-specific DNA binding transcription factor activity; INVOLVED IN: response to ethylene stimulus, regulation of transcription; LOCATED IN: nucleus; EXPRESSED IN: 22 plant structures; EXPRESSED DURING: 13 growth stages; CONTAINS InterPro DOMAIN/s: Helix-loop-helix DNA-binding domain (InterPro:IPR001092), Helix-loop…	Myc-type, basic helix-loop-helix (bHLH) domain	NO
AT1G05710	16	1:1716103-1716195	+	RI	0.27261	0.086951	0.18566	0.982	K3	2.0629	basic helix-loop-helix (bHLH) DNA-binding superfamily protein	basic helix-loop-helix (bHLH) DNA-binding superfamily protein; FUNCTIONS IN: sequence-specific DNA binding transcription factor activity; INVOLVED IN: response to ethylene stimulus, regulation of transcription; LOCATED IN: nucleus; EXPRESSED IN: 22 plant structures; EXPRESSED DURING: 13 growth stages; CONTAINS InterPro DOMAIN/s: Helix-loop-helix DNA-binding domain (InterPro:IPR001092), Helix-loop…	Myc-type, basic helix-loop-helix (bHLH) domain	NO
AT1G05805	3	1:1745318-1746209	+	RI	0.421	0.19032	0.23068	1	K1	0.9891	basic helix-loop-helix (bHLH) DNA-binding superfamily protein	basic helix-loop-helix (bHLH) DNA-binding superfamily protein; FUNCTIONS IN: DNA binding, sequence-specific DNA binding transcription factor activity; INVOLVED IN: regulation of transcription; LOCATED IN: cytosol; EXPRESSED IN: 24 plant structures; EXPRESSED DURING: 13 growth stages; CONTAINS InterPro DOMAIN/s: Helix-loop-helix DNA-binding domain (InterPro:IPR001092), Helix-loop-helix DNA-binding…	Myc-type, basic helix-loop-helix (bHLH) domain	NO
AT1G05830	14	1:1755783-1756067	+	RI	0.35641	0.55326	-0.19685	0.988	K1	0.9962	trithorax-like protein 2	trithorax-like protein 2 (ATX2); FUNCTIONS IN: histone methyltransferase activity (H3-K4 specific), DNA binding; INVOLVED IN: histone H3-K4 methylation, regulation of transcription, DNA-dependent, regulation of transcription; LOCATED IN: nucleus; EXPRESSED IN: stigma, rosette leaf, male gametophyte, root; CONTAINS InterPro DOMAIN/s: SET domain (InterPro:IPR001214), Zinc finger, PHD-type, conserve…	FY-rich, C-terminal | FY-rich, N-terminal | PWWP domain | Post-SET domain | SET domain | Zinc finger, FYVE/PHD-type | Zinc finger, PHD-finger | Zinc finger, PHD-type | Zinc finger, PHD-type, conserved site | Zinc finger, RING/FYVE/PHD-type	NO
AT1G05890	6	1:1779870-1780022	+	RI	0.3411	0.11826	0.22285	0.999	K2	1.1827	RING/U-box superfamily protein	ARIADNE 5 (ARI5); FUNCTIONS IN: zinc ion binding; FUNCTIONS IN: zinc ion binding, nucleic acid binding; EXPRESSED IN: 23 plant structures; EXPRESSED IN: 24 plant structures; EXPRESSED DURING: 15 growth stages; CONTAINS InterPro DOMAIN/s: Zinc finger, C6HC-type (InterPro:IPR002867), Zinc finger, RING-type (InterPro:IPR001841); CONTAINS InterPro DOMAIN/s: Zinc finger, C6HC-type (InterPro:IPR002867)…	Zinc finger, C6HC-type | Zinc finger, CCHC-type | Zinc finger, RING-type | Zinc finger, RING/FYVE/PHD-type	NO
AT1G05890	7	1:1780023-1780065	+	CE	0.33427	0.1171	0.21717	0.997	K2	1.1737	RING/U-box superfamily protein	ARIADNE 5 (ARI5); FUNCTIONS IN: zinc ion binding; FUNCTIONS IN: zinc ion binding, nucleic acid binding; EXPRESSED IN: 23 plant structures; EXPRESSED IN: 24 plant structures; EXPRESSED DURING: 15 growth stages; CONTAINS InterPro DOMAIN/s: Zinc finger, C6HC-type (InterPro:IPR002867), Zinc finger, RING-type (InterPro:IPR001841); CONTAINS InterPro DOMAIN/s: Zinc finger, C6HC-type (InterPro:IPR002867)…	Zinc finger, C6HC-type | Zinc finger, CCHC-type | Zinc finger, RING-type | Zinc finger, RING/FYVE/PHD-type	NO
AT1G05890	8	1:1780066-1780173	+	RI	0.33989	0.11752	0.22238	0.998	K2	1.1827	RING/U-box superfamily protein	ARIADNE 5 (ARI5); FUNCTIONS IN: zinc ion binding; FUNCTIONS IN: zinc ion binding, nucleic acid binding; EXPRESSED IN: 23 plant structures; EXPRESSED IN: 24 plant structures; EXPRESSED DURING: 15 growth stages; CONTAINS InterPro DOMAIN/s: Zinc finger, C6HC-type (InterPro:IPR002867), Zinc finger, RING-type (InterPro:IPR001841); CONTAINS InterPro DOMAIN/s: Zinc finger, C6HC-type (InterPro:IPR002867)…	Zinc finger, C6HC-type | Zinc finger, CCHC-type | Zinc finger, RING-type | Zinc finger, RING/FYVE/PHD-type	NO
AT1G05900	13	1:1787786-1787910	+	CE	0.66945	0.7721	-0.10265	0.935	K5	2.8783	endonuclease III 2	endonuclease III 2 (NTH2); CONTAINS InterPro DOMAIN/s: DNA glycosylase (InterPro:IPR011257), Helix-hairpin-helix DNA-binding motif, class 1 (InterPro:IPR003583), Endonuclease III, conserved site-2 (InterPro:IPR004036), Helix-hairpin-helix motif (InterPro:IPR000445), HhH-GPD domain (InterPro:IPR003265); CONTAINS InterPro DOMAIN/s: DNA glycosylase (InterPro:IPR011257), Helix-hairpin-helix DNA-bindi…	DNA glycosylase | Endonuclease III-like, conserved site-2 | Endonuclease III-like, iron-sulphur cluster loop motif | Helix-hairpin-helix DNA-binding motif, class 1 | Helix-hairpin-helix motif | Helix-turn-helix, base-excision DNA repair, C-terminal | HhH-GPD domain	NO
AT1G05950	18	1:1804952-1804962	-	AD	0.53363	0.71361	-0.17998	0.926	K2	1.3738		unknown protein		NO
AT1G06130	5	1:1860166-1860586	-	RI	0.4343	0.074641	0.35966	1	K2	1.2494	glyoxalase 2-4	glyoxalase 2-4 (GLX2-4); FUNCTIONS IN: hydrolase activity, hydroxyacylglutathione hydrolase activity, zinc ion binding; FUNCTIONS IN: hydrolase activity, zinc ion binding, hydroxyacylglutathione hydrolase activity; INVOLVED IN: methylglyoxal catabolic process to D-lactate; LOCATED IN: chloroplast; EXPRESSED IN: 24 plant structures; EXPRESSED DURING: 13 growth stages; CONTAINS InterPro DOMAIN/s: B…	Beta-lactamase-like | Hydroxyacylglutathione hydrolase	NO
AT1G06500	3	1:1989527-1989667	+	RI	0.5526	0.7915	-0.23889	0.993	K3	2.2194		unknown protein; FUNCTIONS IN: molecular_function unknown; INVOLVED IN: biological_process unknown; LOCATED IN: cellular_component unknown; EXPRESSED IN: 22 plant structures; EXPRESSED DURING: 13 growth stages		NO
AT1G06500	4	1:1989668-1989705	+	CE	0.77029	0.91102	-0.14073	0.946	K3	1.899		unknown protein; FUNCTIONS IN: molecular_function unknown; INVOLVED IN: biological_process unknown; LOCATED IN: cellular_component unknown; EXPRESSED IN: 22 plant structures; EXPRESSED DURING: 13 growth stages		NO
AT1G06560	4	1:2007899-2008185	+	RI	0.35643	0.1819	0.17453	0.945	K1	0.9719	NOL1/NOP2/sun family protein	NOL1/NOP2/sun family protein; FUNCTIONS IN: methyltransferase activity, RNA binding; INVOLVED IN: biological_process unknown; LOCATED IN: cellular_component unknown; EXPRESSED IN: 23 plant structures; EXPRESSED DURING: 13 growth stages; CONTAINS InterPro DOMAIN/s: Bacterial Fmu (Sun)/eukaryotic nucleolar NOL1/Nop2p (InterPro:IPR001678), Pseudouridine synthase/archaeosine transglycosylase-like (In…	Bacterial Fmu (Sun)/eukaryotic nucleolar NOL1/Nop2p | Bacterial Fmu (Sun)/eukaryotic nucleolar NOL1/Nop2p, conserved site | PUA domain | PUA-like domain | RNA (C5-cytosine) methyltransferase | S-adenosyl-L-methionine-dependent methyltransferase-like	NO
AT1G06700	4	1:2055126-2055142	-	AD	0.16276	0.31567	-0.15291	1	K2	1.0285	Protein kinase superfamily protein	Protein kinase superfamily protein; FUNCTIONS IN: protein tyrosine kinase activity, protein kinase activity, kinase activity, ATP binding; INVOLVED IN: protein amino acid phosphorylation; LOCATED IN: plasma membrane; EXPRESSED IN: 25 plant structures; EXPRESSED DURING: 15 growth stages; CONTAINS InterPro DOMAIN/s: Protein kinase, ATP binding site (InterPro:IPR017441), Protein kinase, catalytic do…	Protein kinase domain | Protein kinase, ATP binding site | Protein kinase-like domain | Serine-threonine/tyrosine-protein kinase catalytic domain | Tyrosine-protein kinase, active site	NO
AT1G06710	14	1:2056651-2056719	-	CE	0.80884	0.9268	-0.11795	0.916	K4	3.0567	Tetratricopeptide repeat (TPR)-like superfamily protein	Tetratricopeptide repeat (TPR)-like superfamily protein; LOCATED IN: mitochondrion; EXPRESSED IN: 12 plant structures; EXPRESSED DURING: 7 growth stages; CONTAINS InterPro DOMAIN/s: Pentatricopeptide repeat (InterPro:IPR002885); BEST Arabidopsis thaliana protein match is: Tetratricopeptide repeat (TPR)-like superfamily protein (TAIR:AT3G06920.1)		NO
AT1G06740	2	1:2070894-2071101	+	RI	0.8913	0.23984	0.65147	0.998	K1	0.8113	transposable element gene	Mutator-like transposase family, has a 2.7e-53 P-value blast match to GB:AAA21566 mudrA of transposon="MuDR" (MuDr-element) (Zea mays)	MULE transposase domain | Transposase, MuDR, plant | Zinc finger, CCHC-type | Zinc finger, PMZ-type | Zinc finger, SWIM-type	NO
AT1G06840	2	1:2102959-2103096	-	RI	0.44282	0.039006	0.40381	1	K1	0.9968	Leucine-rich repeat protein kinase family protein	Leucine-rich repeat protein kinase family protein; FUNCTIONS IN: protein serine/threonine kinase activity, protein kinase activity, ATP binding; INVOLVED IN: transmembrane receptor protein tyrosine kinase signaling pathway, protein amino acid phosphorylation; LOCATED IN: plasma membrane, membrane; EXPRESSED IN: 20 plant structures; EXPRESSED DURING: 9 growth stages; CONTAINS InterPro DOMAIN/s: Pr…	Concanavalin A-like lectin/glucanase, subgroup | Leucine-rich repeat | Leucine-rich repeat-containing N-terminal, type 2 | Protein kinase domain | Protein kinase, ATP binding site | Protein kinase-like domain | Serine-threonine/tyrosine-protein kinase catalytic domain | Serine/threonine-protein kinase, active site	NO
AT1G07110	17	1:2182137-2182324	-	RI	0.010394	0.16198	-0.15159	0.966	K11	2.3757	fructose-2,6-bisphosphatase	fructose-2,6-bisphosphatase (F2KP); FUNCTIONS IN: fructose-2,6-bisphosphate 2-phosphatase activity; INVOLVED IN: N-terminal protein myristoylation, fructose metabolic process; LOCATED IN: cytosol, plasma membrane; EXPRESSED IN: 24 plant structures; EXPRESSED DURING: 14 growth stages; CONTAINS InterPro DOMAIN/s: Bifunctional 6-phosphofructo-2-kinase/fructose-2, 6-bisphosphate 2-phosphatase (InterP…	6-phosphofructo-2-kinase | Bifunctional 6-phosphofructo-2-kinase/fructose-2, 6-bisphosphate 2-phosphatase | Carbohydrate binding module family 20 | Carbohydrate-binding-like fold | Fructose-2,6-bisphosphatase | Histidine phosphatase superfamily | Histidine phosphatase superfamily, clade-1 | Immunoglobulin-like fold | P-loop containing nucleoside triphosphate hydrolase | Phosphoglycerate/bisphosph…	NO
AT1G07390	5	1:2270458-2270576	+	RI	0.65899	0.16864	0.49035	0.996	K2	1.4056	receptor like protein 1	receptor like protein 1 (RLP1); CONTAINS InterPro DOMAIN/s: Leucine-rich repeat, typical subtype (InterPro:IPR003591), Leucine-rich repeat (InterPro:IPR001611); CONTAINS InterPro DOMAIN/s: Leucine-rich repeat, typical subtype (InterPro:IPR003591), Leucine-rich repeat-containing N-terminal domain, type 2 (InterPro:IPR013210), Leucine-rich repeat (InterPro:IPR001611); BEST Arabidopsis thaliana prot…	Leucine rich repeat 4 | Leucine-rich repeat	NO
AT1G07570	7	1:2333282-2333386	-	RI	0.53005	0.30503	0.22502	0.952	K4	1.5882	Protein kinase superfamily protein	APK1A; FUNCTIONS IN: protein serine/threonine kinase activity, kinase activity; INVOLVED IN: protein amino acid phosphorylation; INVOLVED IN: protein amino acid phosphorylation, N-terminal protein myristoylation; EXPRESSED IN: 20 plant structures; LOCATED IN: plasma membrane; EXPRESSED DURING: 8 growth stages; CONTAINS InterPro DOMAIN/s: Protein kinase, ATP binding site (InterPro:IPR017441), Seri…	Concanavalin A-like lectin/glucanase, subgroup | Protein kinase domain | Protein kinase, ATP binding site | Protein kinase-like domain | Serine-threonine/tyrosine-protein kinase catalytic domain | Serine/threonine-protein kinase, active site	NO
AT1G07640	4	1:2355700-2355795	-	RI	0.99153	0.79433	0.1972	1	K1	0.8767	Dof-type zinc finger DNA-binding family protein	OBP2; CONTAINS InterPro DOMAIN/s: Zinc finger, Dof-type (InterPro:IPR003851); BEST Arabidopsis thaliana protein match is: Dof-type zinc finger DNA-binding family protein (TAIR:AT2G28810.1); BEST Arabidopsis thaliana protein match is: Dof-type zinc finger DNA-binding family protein (TAIR:AT2G28810.2)	Zinc finger, Dof-type	NO
AT1G07700	4	1:2379730-2379798	+	AD	0.26522	0.6476	-0.38238	1	K2	1.1417	Thioredoxin superfamily protein	Thioredoxin superfamily protein; INVOLVED IN: cell redox homeostasis; LOCATED IN: chloroplast; LOCATED IN: chloroplast stroma, chloroplast; EXPRESSED IN: 24 plant structures; EXPRESSED DURING: 15 growth stages; CONTAINS InterPro DOMAIN/s: Thioredoxin fold (InterPro:IPR012335), Thioredoxin, core (InterPro:IPR015467), Thioredoxin domain (InterPro:IPR013766), Thioredoxin-like fold (InterPro:IPR01233…	Thioredoxin | Thioredoxin domain | Thioredoxin-like fold	NO
AT1G07705	3	1:2381755-2381994	+	RI	0.41656	0.11457	0.30198	0.993	K1	0.9997	NOT2 / NOT3 / NOT5 family	NOT2 / NOT3 / NOT5 family; FUNCTIONS IN: transcription regulator activity; INVOLVED IN: regulation of transcription; LOCATED IN: nucleus, chloroplast; EXPRESSED IN: 23 plant structures; EXPRESSED DURING: 13 growth stages; CONTAINS InterPro DOMAIN/s: NOT2/NOT3/NOT5 (InterPro:IPR007282); BEST Arabidopsis thaliana protein match is: VIRE2 interacting protein 2 (TAIR:AT5G59710.1)	NOT2/NOT3/NOT5	NO
AT1G08110	8	1:2535386-2535481	+	RI	0.053887	0.18757	-0.13369	1	K3	1.6069	lactoylglutathione lyase family protein / glyoxalase I family protein	lactoylglutathione lyase family protein / glyoxalase I family protein; FUNCTIONS IN: calmodulin binding, lactoylglutathione lyase activity; INVOLVED IN: response to cadmium ion, carbohydrate metabolic process; LOCATED IN: chloroplast; EXPRESSED IN: 25 plant structures; EXPRESSED DURING: 14 growth stages; CONTAINS InterPro DOMAIN/s: Glyoxalase I (InterPro:IPR004361), Glyoxalase I, conserved site (…	Glyoxalase I | Glyoxalase I, conserved site | Glyoxalase/Bleomycin resistance protein/Dihydroxybiphenyl dioxygenase | Glyoxalase/fosfomycin resistance/dioxygenase domain	NO
AT1G08230	9	1:2585085-2586097	-	RI	0.50977	0.30447	0.2053	0.958	K2	1.5849	Transmembrane amino acid transporter family protein	Transmembrane amino acid transporter family protein; EXPRESSED IN: 22 plant structures; EXPRESSED DURING: 10 growth stages; CONTAINS InterPro DOMAIN/s: Amino acid transporter, transmembrane (InterPro:IPR013057); BEST Arabidopsis thaliana protein match is: Transmembrane amino acid transporter family protein (TAIR:AT5G41800.1)	Amino acid transporter, transmembrane	NO
AT1G08620	7	1:2737049-2737267	+	RI	0.7718	0.17754	0.59426	1	K2	1.477	Transcription factor jumonji (jmj) family protein / zinc finger (C5HC2 type) family protein	PKDM7D; FUNCTIONS IN: sequence-specific DNA binding transcription factor activity; INVOLVED IN: regulation of transcription; LOCATED IN: nucleus; EXPRESSED IN: 23 plant structures; EXPRESSED DURING: 15 growth stages; CONTAINS InterPro DOMAIN/s: Transcription factor jumonji/aspartyl beta-hydroxylase (InterPro:IPR003347), FY-rich, C-terminal (InterPro:IPR003889), FY-rich, N-terminal (InterPro:IPR00…	FY-rich, C-terminal | FY-rich, N-terminal | JmjC domain | Transcription factor jumonji, JmjN | Zinc finger, C5HC2-type	NO
AT1G08910	25	1:2858653-2858704	+	CE	0.70874	0.82514	-0.1164	0.924	K3	2.1238	zinc ion binding;zinc ion binding	embryo defective 3001 (EMB3001); FUNCTIONS IN: zinc ion binding; INVOLVED IN: embryo development ending in seed dormancy; LOCATED IN: cellular_component unknown; CONTAINS InterPro DOMAIN/s: Zinc finger, MIZ-type (InterPro:IPR004181); BEST Arabidopsis thaliana protein match is: RING/U-box superfamily protein (TAIR:AT5G41580.1)	E3 SUMO protein ligase | Zinc finger, MIZ-type	NO
AT1G09140	21	1:2943227-2943564	-	AA	0.36175	0.75025	-0.38851	1	K2	1.1096	SERINE-ARGININE PROTEIN 30	SERINE-ARGININE PROTEIN 30 (ATSRP30); CONTAINS InterPro DOMAIN/s: RNA recognition motif, RNP-1 (InterPro:IPR000504), Nucleotide-binding, alpha-beta plait (InterPro:IPR012677); BEST Arabidopsis thaliana protein match is: RNA-binding (RRM/RBD/RNP motifs) family protein (TAIR:AT1G02840.3)	Nucleotide-binding, alpha-beta plait | RNA recognition motif domain	NO
AT1G09195	8	1:2970722-2971077	-	EI/RI	0.90761	0.75889	0.14872	0.949	K1	0.8998		FUNCTIONS IN: molecular_function unknown; INVOLVED IN: biological_process unknown; CONTAINS InterPro DOMAIN/s: Metal-dependent phosphohydrolase, HD subdomain (InterPro:IPR006674), Ppx/GppA phosphatase (InterPro:IPR003695); LOCATED IN: mitochondrion	HD domain | Ppx/GppA phosphatase	NO
AT1G09195	8	1:2970722-2971077	-	RI	0.90761	0.75889	0.14872	0.949	K1	0.8998		FUNCTIONS IN: molecular_function unknown; INVOLVED IN: biological_process unknown; CONTAINS InterPro DOMAIN/s: Metal-dependent phosphohydrolase, HD subdomain (InterPro:IPR006674), Ppx/GppA phosphatase (InterPro:IPR003695); LOCATED IN: mitochondrion	HD domain | Ppx/GppA phosphatase	NO
AT1G09420	28	1:3038878-3038970	-	RI	0.40231	0.19131	0.211	0.904	K1	1	glucose-6-phosphate dehydrogenase 4	glucose-6-phosphate dehydrogenase 4 (G6PD4); FUNCTIONS IN: glucose-6-phosphate dehydrogenase activity; INVOLVED IN: oxidation reduction, glucose metabolic process, metabolic process; LOCATED IN: chloroplast; EXPRESSED IN: 14 plant structures; EXPRESSED DURING: 6 growth stages; CONTAINS InterPro DOMAIN/s: Glucose-6-phosphate dehydrogenase, C-terminal (InterPro:IPR022675), NAD(P)-binding domain (In…	Glucose-6-phosphate dehydrogenase | Glucose-6-phosphate dehydrogenase, C-terminal | Glucose-6-phosphate dehydrogenase, NAD-binding | NAD(P)-binding domain	NO
AT1G09490	4	1:3064290-3064704	+	RI	0.32155	0.14947	0.17208	0.996	K1	0.94	NAD(P)-binding Rossmann-fold superfamily protein	NAD(P)-binding Rossmann-fold superfamily protein; FUNCTIONS IN: alcohol dehydrogenase (NAD) activity, cinnamyl-alcohol dehydrogenase activity; INVOLVED IN: lignin biosynthetic process, cellular metabolic process, metabolic process; CONTAINS InterPro DOMAIN/s: NAD-dependent epimerase/dehydratase (InterPro:IPR001509), NAD(P)-binding domain (InterPro:IPR016040); LOCATED IN: endomembrane system; BEST…	NAD(P)-binding domain | NAD-dependent epimerase/dehydratase, N-terminal domain	NO
AT1G09500	5	1:3066929-3067340	+	RI	0.37714	0.13411	0.24303	0.928	K2	1.5305	NAD(P)-binding Rossmann-fold superfamily protein	NAD(P)-binding Rossmann-fold superfamily protein; FUNCTIONS IN: alcohol dehydrogenase (NAD) activity, cinnamyl-alcohol dehydrogenase activity; INVOLVED IN: lignin biosynthetic process, cellular metabolic process, metabolic process; LOCATED IN: endomembrane system; EXPRESSED IN: 9 plant structures; EXPRESSED DURING: LP.06 six leaves visible, LP.04 four leaves visible, 4 anthesis, petal differentia…	NAD(P)-binding domain | NAD-dependent epimerase/dehydratase, N-terminal domain	NO
AT1G09660	2	1:3130800-3130873	-	RI	0.19403	0.07683	0.1172	0.981	K1	0.793	RNA-binding KH domain-containing protein	RNA-binding KH domain-containing protein; FUNCTIONS IN: RNA binding, nucleic acid binding; INVOLVED IN: biological_process unknown; LOCATED IN: cellular_component unknown; EXPRESSED IN: 23 plant structures; EXPRESSED DURING: 13 growth stages; CONTAINS InterPro DOMAIN/s: K Homology (InterPro:IPR004087); BEST Arabidopsis thaliana protein match is: RNA-binding KH domain-containing protein (TAIR:AT4G…	K Homology domain | K Homology domain, type 1	NO
AT1G09840	5	1:3200104-3200182	-	RI	0.65661	0.89214	-0.23553	1	K2	1.1662	shaggy-like protein kinase 41	shaggy-like protein kinase 41 (SK41); FUNCTIONS IN: protein serine/threonine kinase activity, protein kinase activity, ATP binding; INVOLVED IN: protein amino acid phosphorylation; LOCATED IN: plasma membrane; EXPRESSED IN: 24 plant structures; EXPRESSED DURING: 13 growth stages; CONTAINS InterPro DOMAIN/s: Protein kinase, ATP binding site (InterPro:IPR017441), Protein kinase, catalytic domain (I…	Protein kinase domain | Protein kinase, ATP binding site | Protein kinase-like domain | Serine/threonine-protein kinase, active site | Serine/threonine/dual specificity protein kinase, catalytic domain	NO
AT1G09910	5	1:3223832-3224206	-	RI	0.56621	0.13301	0.4332	1	K1	0.9983	Rhamnogalacturonate lyase family protein	Rhamnogalacturonate lyase family protein; FUNCTIONS IN: lyase activity; INVOLVED IN: carbohydrate metabolic process; LOCATED IN: cellular_component unknown; EXPRESSED IN: 23 plant structures; EXPRESSED DURING: 13 growth stages; CONTAINS InterPro DOMAIN/s: Glycoside hydrolase-type carbohydrate-binding (InterPro:IPR011013), Rhamnogalacturonate lyase (InterPro:IPR010325), Carbohydrate-binding-like f…	Carbohydrate-binding-like fold | Carboxypeptidase, regulatory domain | Galactose mutarotase-like domain | Galactose-binding domain-like | Rhamnogalacturonan lyase, domain II | Rhamnogalacturonan lyase, domain III | Rhamnogalacturonate lyase	NO
AT1G09980	6	1:3261247-3261327	-	RI	0.16188	0.017639	0.14424	0.991	K1	0.758	Putative serine esterase family protein	Putative serine esterase family protein; INVOLVED IN: biological_process unknown; LOCATED IN: mitochondrion; EXPRESSED IN: 22 plant structures; EXPRESSED DURING: 13 growth stages; CONTAINS InterPro DOMAIN/s: Protein of unknown function DUF3657 (InterPro:IPR022122), Protein of unknown function DUF676, hydrolase-like (InterPro:IPR007751); BEST Arabidopsis thaliana protein match is: Putative serine …	Alpha/Beta hydrolase fold | Domain of unknown function DUF676, lipase-like | Protein of unknown function DUF3657	NO
AT1G10070	2	1:3288154-3288237	+	RI	0.62297	0.85598	-0.23301	0.99	K1	0.9963	branched-chain amino acid transaminase 2	branched-chain amino acid transaminase 2 (BCAT-2); FUNCTIONS IN: branched-chain-amino-acid transaminase activity, catalytic activity; INVOLVED IN: branched chain family amino acid metabolic process, metabolic process; LOCATED IN: chloroplast; EXPRESSED IN: 21 plant structures; EXPRESSED DURING: 14 growth stages; CONTAINS InterPro DOMAIN/s: Aminotransferase, class IV (InterPro:IPR001544), Aminotra…	Aminotransferase, class IV | Aminotransferase, class IV, conserved site | Branched-chain amino acid aminotransferase II	NO
AT1G10090	6	1:3295381-3295773	-	RI	0.22865	0.046413	0.18224	0.981	K1	0.7919	Early-responsive to dehydration stress protein (ERD4)	Early-responsive to dehydration stress protein (ERD4); FUNCTIONS IN: molecular_function unknown; INVOLVED IN: biological_process unknown; LOCATED IN: endomembrane system, membrane; EXPRESSED IN: 24 plant structures; EXPRESSED DURING: 14 growth stages; CONTAINS InterPro DOMAIN/s: Protein of unknown function DUF221 (InterPro:IPR003864); BEST Arabidopsis thaliana protein match is: lipases;hydrolases…	Domain of unknown function DUF221	NO
AT1G10095	5	1:3299360-3299450	-	CE	0.57382	0.37332	0.2005	0.952	K1	0.9998	Protein prenylyltransferase superfamily protein	Protein prenylyltransferase superfamily protein; FUNCTIONS IN: protein prenyltransferase activity; INVOLVED IN: protein amino acid prenylation; LOCATED IN: cellular_component unknown; CONTAINS InterPro DOMAIN/s: Protein prenyltransferase (InterPro:IPR008940), Protein prenyltransferase, alpha subunit (InterPro:IPR002088)	Protein prenyltransferase, alpha subunit	NO
AT1G10320	21	1:3386467-3386576	-	RI	0.25441	0.41558	-0.16117	0.932	K5	4.0514	Zinc finger C-x8-C-x5-C-x3-H type family protein	Zinc finger C-x8-C-x5-C-x3-H type family protein; FUNCTIONS IN: RNA binding, nucleotide binding, zinc ion binding, nucleic acid binding; LOCATED IN: nucleus; EXPRESSED IN: 22 plant structures; EXPRESSED DURING: 13 growth stages; CONTAINS InterPro DOMAIN/s: Zinc finger, CCCH-type (InterPro:IPR000571), RNA recognition motif, RNP-1 (InterPro:IPR000504), Nucleotide-binding, alpha-beta plait (InterPro…	Nucleotide-binding, alpha-beta plait | RNA recognition motif domain | RNA recognition motif domain, eukaryote | U2 auxiliary factor small subunit | Zinc finger, CCCH-type	NO
AT1G10320	9	1:3387221-3387250	-	AD	0.76809	0.93326	-0.16517	0.915	K4	3.2293	Zinc finger C-x8-C-x5-C-x3-H type family protein	Zinc finger C-x8-C-x5-C-x3-H type family protein; FUNCTIONS IN: RNA binding, nucleotide binding, zinc ion binding, nucleic acid binding; LOCATED IN: nucleus; EXPRESSED IN: 22 plant structures; EXPRESSED DURING: 13 growth stages; CONTAINS InterPro DOMAIN/s: Zinc finger, CCCH-type (InterPro:IPR000571), RNA recognition motif, RNP-1 (InterPro:IPR000504), Nucleotide-binding, alpha-beta plait (InterPro…	Nucleotide-binding, alpha-beta plait | RNA recognition motif domain | RNA recognition motif domain, eukaryote | U2 auxiliary factor small subunit | Zinc finger, CCCH-type	NO
AT1G10360	4	1:3396101-3396485	-	RI	0.69961	0.48213	0.21748	0.994	K2	1.0827	glutathione S-transferase TAU 18	glutathione S-transferase TAU 18 (GSTU18); CONTAINS InterPro DOMAIN/s: Thioredoxin fold (InterPro:IPR012335), Glutathione S-transferase, C-terminal (InterPro:IPR004046), Glutathione S-transferase, C-terminal-like (InterPro:IPR010987), Glutathione S-transferase/chloride channel, C-terminal (InterPro:IPR017933), Glutathione S-transferase, N-terminal (InterPro:IPR004045), Thioredoxin-like fold (Inte…	Glutathione S-transferase, C-terminal | Glutathione S-transferase, C-terminal-like | Glutathione S-transferase, N-terminal | Thioredoxin-like fold	NO
AT1G10490	6	1:3453338-3453559	+	RI	0.26358	0.028199	0.23538	0.997	K2	1.7146	Domain of unknown function (DUF1726) ;Putative ATPase (DUF699)	CONTAINS InterPro DOMAIN/s: Domain of unknown function DUF1726 (InterPro:IPR013562), Domain of unknown function DUF699, exodeoxyribonuclease V alpha chain (InterPro:IPR007807); BEST Arabidopsis thaliana protein match is: Domain of unknown function (DUF1726) ;Putative ATPase (DUF699) (TAIR:AT3G57940.1)	Domain of unknown function DUF1726 | GNAT domain | Helicase domain | Possible tRNA binding domain	NO
AT1G10570	9	1:3487975-3488059	+	RI	0.72434	0.56875	0.15559	0.924	K2	1.6697	Cysteine proteinases superfamily protein	OVERLY TOLERANT TO SALT 2 (OTS2); CONTAINS InterPro DOMAIN/s: Peptidase C48, SUMO/Sentrin/Ubl1 (InterPro:IPR003653); BEST Arabidopsis thaliana protein match is: UB-like protease 1D (TAIR:AT1G60220.1)	Peptidase C48, SUMO/Sentrin/Ubl1	NO
AT1G10650	5	1:3525972-3526099	-	RI	0.71417	0.084848	0.62932	1	K1	0.8893	SBP (S-ribonuclease binding protein) family protein	SBP (S-ribonuclease binding protein) family protein; FUNCTIONS IN: zinc ion binding; INVOLVED IN: biological_process unknown; LOCATED IN: cellular_component unknown; EXPRESSED IN: 24 plant structures; EXPRESSED DURING: 15 growth stages; CONTAINS InterPro DOMAIN/s: Zinc finger, RING-type (InterPro:IPR001841), S-ribonuclease binding protein, SBP1, pollen (InterPro:IPR017066); BEST Arabidopsis thali…	S-ribonuclease binding protein, SBP1, pollen | Zinc finger, RING-type	NO
AT1G10660	4	1:3532668-3532891	+	RI	0.13868	0.017644	0.12103	1	K3	1.3166		unknown protein; LOCATED IN: endomembrane system; EXPRESSED IN: 24 plant structures; EXPRESSED DURING: 15 growth stages; BEST Arabidopsis thaliana protein match is: unknown protein (TAIR:AT5G62960.1)		NO
AT1G10780	4	1:3594315-3594997	-	RI	0.2856	0.11975	0.16585	0.928	K1	0.9024	F-box/RNI-like superfamily protein	F-box/RNI-like superfamily protein; CONTAINS InterPro DOMAIN/s: F-box domain, cyclin-like (InterPro:IPR001810), F-box domain, Skp2-like (InterPro:IPR022364); BEST Arabidopsis thaliana protein match is: F-box/RNI-like superfamily protein (TAIR:AT1G67190.2)	F-box domain	NO
AT1G10900	8	1:3636998-3637022	-	AD	0.084755	0.25906	-0.1743	0.991	K3	1.162	Phosphatidylinositol-4-phosphate 5-kinase family protein	Phosphatidylinositol-4-phosphate 5-kinase family protein; FUNCTIONS IN: 1-phosphatidylinositol-4-phosphate 5-kinase activity, phosphatidylinositol phosphate kinase activity, ATP binding; INVOLVED IN: phosphatidylinositol metabolic process; LOCATED IN: plasma membrane; EXPRESSED IN: 21 plant structures; EXPRESSED DURING: 13 growth stages; CONTAINS InterPro DOMAIN/s: Phosphatidylinositol-4-phosphat…	MORN motif | Phosphatidylinositol-4-phosphate 5-kinase | Phosphatidylinositol-4-phosphate 5-kinase, C-terminal | Phosphatidylinositol-4-phosphate 5-kinase, N-terminal domain | Phosphatidylinositol-4-phosphate 5-kinase, core | Phosphatidylinositol-4-phosphate 5-kinase, core, subgroup | Phosphatidylinositol-4-phosphate 5-kinase, plant	NO
AT1G10910	26	1:3643583-3643731	+	RI	0.36917	0.55787	-0.18869	0.986	K2	1.1161	Pentatricopeptide repeat (PPR) superfamily protein	Pentatricopeptide repeat (PPR) superfamily protein; CONTAINS InterPro DOMAIN/s: Pentatricopeptide repeat (InterPro:IPR002885); BEST Arabidopsis thaliana protein match is: plastid transcriptionally active 2 (TAIR:AT1G74850.1)	Pentatricopeptide repeat	NO
AT1G11000	17	1:3674021-3674465	-	RI	0.083483	0.19962	-0.11614	0.939	K1	0.8216	Seven transmembrane MLO family protein	MILDEW RESISTANCE LOCUS O 4 (MLO4); FUNCTIONS IN: calmodulin binding; INVOLVED IN: cell death, defense response; LOCATED IN: integral to membrane, plasma membrane; EXPRESSED IN: 18 plant structures; EXPRESSED DURING: 7 growth stages; CONTAINS InterPro DOMAIN/s: Mlo-related protein (InterPro:IPR004326); BEST Arabidopsis thaliana protein match is: Seven transmembrane MLO family protein (TAIR:AT5G53…	Mlo-related protein	NO
AT1G11080	15	1:3696216-3696394	-	RI	0.073855	0.17771	-0.10386	0.908	K1	0.6652	serine carboxypeptidase-like 31	serine carboxypeptidase-like 31 (scpl31); FUNCTIONS IN: serine-type carboxypeptidase activity; INVOLVED IN: proteolysis; LOCATED IN: endomembrane system; EXPRESSED IN: 17 plant structures; EXPRESSED DURING: 4 anthesis, C globular stage, petal differentiation and expansion stage, E expanded cotyledon stage, D bilateral stage; CONTAINS InterPro DOMAIN/s: Peptidase S10, serine carboxypeptidase (Inte…	Alpha/Beta hydrolase fold | Peptidase S10, serine carboxypeptidase | Peptidase S10, serine carboxypeptidase, active site	NO
AT1G11170	10	1:3741315-3741524	+	RI	0.36651	0.1319	0.23461	0.921	K2	0.9996	Protein of unknown function (DUF707)	Protein of unknown function (DUF707); CONTAINS InterPro DOMAIN/s: Protein of unknown function DUF707 (InterPro:IPR007877); BEST Arabidopsis thaliana protein match is: Protein of unknown function (DUF707) (TAIR:AT1G61240.4)	Protein of unknown function DUF707	NO
AT1G11270	4	1:3786675-3786797	-	RI	0.70582	0.25063	0.45519	0.998	K3	1.2988	F-box and associated interaction domains-containing protein	F-box and associated interaction domains-containing protein; CONTAINS InterPro DOMAIN/s: F-box domain, cyclin-like (InterPro:IPR001810), F-box domain, Skp2-like (InterPro:IPR022364); CONTAINS InterPro DOMAIN/s: F-box domain, cyclin-like (InterPro:IPR001810), F-box domain, Skp2-like (InterPro:IPR022364), F-box associated domain, type 1 (InterPro:IPR006527); BEST Arabidopsis thaliana protein match …	F-box associated domain, type 1 | F-box associated interaction domain | F-box domain	NO
AT1G11350	6	1:3819392-3819470	-	RI	0.51645	0.36248	0.15398	0.903	K1	0.9999	S-domain-1 13	S-domain-1 13 (SD1-13); CONTAINS InterPro DOMAIN/s: Curculin-like (mannose-binding) lectin (InterPro:IPR001480), Apple-like (InterPro:IPR003609), Protein kinase, ATP binding site (InterPro:IPR017441), PAN-2 domain (InterPro:IPR013227), Serine/threonine-protein kinase domain (InterPro:IPR002290), Serine-threonine/tyrosine-protein kinase (InterPro:IPR001245), Serine/threonine-protein kinase, active…	Apple-like | Bulb-type lectin domain | Concanavalin A-like lectin/glucanase, subgroup | PAN-2 domain | Protein kinase domain | Protein kinase, ATP binding site | Protein kinase-like domain | S-locus glycoprotein | S-receptor-like serine/threonine-protein kinase | Serine-threonine/tyrosine-protein kinase catalytic domain | Serine/threonine-protein kinase, active site	NO
AT1G11360	3	1:3822147-3822163	-	AD	0.817	0.55565	0.26134	0.995	K3	2.312	Adenine nucleotide alpha hydrolases-like superfamily protein	Adenine nucleotide alpha hydrolases-like superfamily protein; INVOLVED IN: response to stress; LOCATED IN: cytosol; LOCATED IN: cytosol, plasma membrane; EXPRESSED IN: 23 plant structures; EXPRESSED IN: 24 plant structures; EXPRESSED DURING: 13 growth stages; CONTAINS InterPro DOMAIN/s: UspA (InterPro:IPR006016), Rossmann-like alpha/beta/alpha sandwich fold (InterPro:IPR014729), Universal stress …	Rossmann-like alpha/beta/alpha sandwich fold | Universal stress protein A | UspA	NO
AT1G11360	4	1:3822018-3822146	-	AD	0.68565	0.39067	0.29497	0.997	K3	2.312	Adenine nucleotide alpha hydrolases-like superfamily protein	Adenine nucleotide alpha hydrolases-like superfamily protein; INVOLVED IN: response to stress; LOCATED IN: cytosol; LOCATED IN: cytosol, plasma membrane; EXPRESSED IN: 23 plant structures; EXPRESSED IN: 24 plant structures; EXPRESSED DURING: 13 growth stages; CONTAINS InterPro DOMAIN/s: UspA (InterPro:IPR006016), Rossmann-like alpha/beta/alpha sandwich fold (InterPro:IPR014729), Universal stress …	Rossmann-like alpha/beta/alpha sandwich fold | Universal stress protein A | UspA	NO
AT1G11360	5	1:3821796-3822017	-	RI	0.39549	0.15789	0.2376	0.985	K3	2.312	Adenine nucleotide alpha hydrolases-like superfamily protein	Adenine nucleotide alpha hydrolases-like superfamily protein; INVOLVED IN: response to stress; LOCATED IN: cytosol; LOCATED IN: cytosol, plasma membrane; EXPRESSED IN: 23 plant structures; EXPRESSED IN: 24 plant structures; EXPRESSED DURING: 13 growth stages; CONTAINS InterPro DOMAIN/s: UspA (InterPro:IPR006016), Rossmann-like alpha/beta/alpha sandwich fold (InterPro:IPR014729), Universal stress …	Rossmann-like alpha/beta/alpha sandwich fold | Universal stress protein A | UspA	NO
AT1G11400	3	1:3837988-3838083	+	AD	0.081445	0.23912	-0.15767	0.926	K2	1.5413	partner of Y14-MAGO	partner of Y14-MAGO (PYM); FUNCTIONS IN: protein binding; INVOLVED IN: biological_process unknown; LOCATED IN: nucleoplasm, nucleolus, cytoplasm; EXPRESSED IN: 23 plant structures; EXPRESSED DURING: 15 growth stages; CONTAINS InterPro DOMAIN/s: Exon junction complex, Pym (InterPro:IPR015362)	Exon junction complex, Pym	NO
AT1G11400	5	1:3838163-3838707	+	RI	0.19609	0.042695	0.1534	0.978	K3	1.8592	partner of Y14-MAGO	partner of Y14-MAGO (PYM); FUNCTIONS IN: protein binding; INVOLVED IN: biological_process unknown; LOCATED IN: nucleoplasm, nucleolus, cytoplasm; EXPRESSED IN: 23 plant structures; EXPRESSED DURING: 15 growth stages; CONTAINS InterPro DOMAIN/s: Exon junction complex, Pym (InterPro:IPR015362)	Exon junction complex, Pym	NO
AT1G11790	4	1:3981741-3983203	+	RI	0.21617	0.026862	0.1893	0.995	K2	0.9738	arogenate dehydratase 1	arogenate dehydratase 1 (ADT1); FUNCTIONS IN: arogenate dehydratase activity, prephenate dehydratase activity; INVOLVED IN: L-phenylalanine biosynthetic process; INVOLVED IN: L-phenylalanine biosynthetic process, metabolic process; LOCATED IN: chloroplast; EXPRESSED IN: 21 plant structures; EXPRESSED DURING: 13 growth stages; CONTAINS InterPro DOMAIN/s: Prephenate dehydratase (InterPro:IPR001086)…	ACT domain | Prephenate dehydratase | Prephenate dehydratase, conserved site	NO
AT1G11820	12	1:3991277-3991387	-	RI	0.12413	0.26174	-0.13761	0.909	K1	0.8691	O-Glycosyl hydrolases family 17 protein	O-Glycosyl hydrolases family 17 protein; FUNCTIONS IN: cation binding, hydrolase activity, hydrolyzing O-glycosyl compounds, catalytic activity; INVOLVED IN: carbohydrate metabolic process; LOCATED IN: endomembrane system; CONTAINS InterPro DOMAIN/s: Glycoside hydrolase, catalytic core (InterPro:IPR017853), Glycoside hydrolase, family 17 (InterPro:IPR000490), Glycoside hydrolase, subgroup, cataly…	Glycoside hydrolase, catalytic domain | Glycoside hydrolase, family 17 | Glycoside hydrolase, superfamily | X8	NO
AT1G12080	2	1:4084304-4084486	+	RI	0.13741	0.023771	0.11364	1	K1	0.6141	Vacuolar calcium-binding protein-related	Vacuolar calcium-binding protein-related; BEST Arabidopsis thaliana protein match is: Vacuolar calcium-binding protein-related (TAIR:AT1G62480.1)		NO
AT1G12120	3	1:4116514-4117297	-	RI	0.14795	0.021618	0.12633	1	K1	0.6338	Plant protein of unknown function (DUF863)	Plant protein of unknown function (DUF863); CONTAINS InterPro DOMAIN/s: Protein of unknown function DUF863, plant (InterPro:IPR008581); BEST Arabidopsis thaliana protein match is: Plant protein of unknown function (DUF863) (TAIR:AT1G62530.2)	Protein of unknown function DUF863, plant	NO
AT1G12220	7	1:4145230-4145306	+	EI/RI	0.43819	0.94277	-0.50458	1	K2	1.5042	Disease resistance protein (CC-NBS-LRR class) family	RESISTANT TO P. SYRINGAE 5 (RPS5); CONTAINS InterPro DOMAIN/s: Leucine-rich repeat-containing protein (InterPro:IPR015766), NB-ARC (InterPro:IPR002182), Disease resistance protein (InterPro:IPR000767); BEST Arabidopsis thaliana protein match is: LRR and NB-ARC domains-containing disease resistance protein (TAIR:AT1G12280.1)	Leucine-rich repeat | NB-ARC | P-loop containing nucleoside triphosphate hydrolase	NO
AT1G12220	7	1:4145230-4145306	+	RI	0.43819	0.94277	-0.50458	1	K2	1.5042	Disease resistance protein (CC-NBS-LRR class) family	RESISTANT TO P. SYRINGAE 5 (RPS5); CONTAINS InterPro DOMAIN/s: Leucine-rich repeat-containing protein (InterPro:IPR015766), NB-ARC (InterPro:IPR002182), Disease resistance protein (InterPro:IPR000767); BEST Arabidopsis thaliana protein match is: LRR and NB-ARC domains-containing disease resistance protein (TAIR:AT1G12280.1)	Leucine-rich repeat | NB-ARC | P-loop containing nucleoside triphosphate hydrolase	NO
AT1G12350	5	1:4198562-4198862	+	AA	0.17568	0.037886	0.13779	0.997	K2	0.9462	4-phospho-panto-thenoylcysteine synthetase	4-phospho-panto-thenoylcysteine synthetase (COAB); FUNCTIONS IN: phosphopantothenate--cysteine ligase activity, catalytic activity; INVOLVED IN: coenzyme A biosynthetic process; LOCATED IN: chloroplast; CONTAINS InterPro DOMAIN/s: DNA/pantothenate metabolism flavoprotein, C-terminal (InterPro:IPR007085); BEST Arabidopsis thaliana protein match is: DNA / pantothenate metabolism flavoprotein (TAIR:…	DNA/pantothenate metabolism flavoprotein, C-terminal	NO
AT1G12450	5	1:4244407-4244506	+	RI	0.67439	0.95228	-0.27789	0.999	K1	0.9341	SNARE associated Golgi protein family	SNARE associated Golgi protein family; CONTAINS InterPro DOMAIN/s: SNARE associated Golgi protein (InterPro:IPR015414); BEST Arabidopsis thaliana protein match is: SNARE associated Golgi protein family (TAIR:AT4G22850.1)	SNARE associated Golgi protein	NO
AT1G12740	21	1:4344385-4344475	+	RI	0.07879	0.18407	-0.10528	0.91	K1	0.6665	cytochrome P450, family 87, subfamily A, polypeptide 2	cytochrome P450, family 87, subfamily A, polypeptide 2 (CYP87A2); FUNCTIONS IN: electron carrier activity, monooxygenase activity, iron ion binding, oxygen binding, heme binding; INVOLVED IN: oxidation reduction; EXPRESSED IN: root; CONTAINS InterPro DOMAIN/s: Cytochrome P450 (InterPro:IPR001128), Cytochrome P450, E-class, group I (InterPro:IPR002401), Cytochrome P450, conserved site (InterPro:IP…	Cytochrome P450 | Cytochrome P450, E-class, group I | Cytochrome P450, conserved site	NO
AT1G13000	11	1:4438765-4439111	-	RI	0.12463	0.011007	0.11363	0.998	K3	1.2482	Protein of unknown function (DUF707)	Protein of unknown function (DUF707); CONTAINS InterPro DOMAIN/s: Protein of unknown function DUF707 (InterPro:IPR007877); BEST Arabidopsis thaliana protein match is: Protein of unknown function (DUF707) (TAIR:AT3G26440.2)	Protein of unknown function DUF707	NO
AT1G13350	15	1:4576048-4576142	-	RI	0.81997	0.70226	0.11772	0.975	K5	2.6698	Protein kinase superfamily protein	Protein kinase superfamily protein; FUNCTIONS IN: protein serine/threonine kinase activity, protein kinase activity, ATP binding; INVOLVED IN: protein amino acid phosphorylation; LOCATED IN: nucleus, cytoplasm; EXPRESSED IN: male gametophyte, cultured cell, pollen tube; EXPRESSED IN: male gametophyte, pollen tube; EXPRESSED DURING: L mature pollen stage, M germinated pollen stage; CONTAINS InterP…	Protein kinase domain | Protein kinase-like domain | Serine/threonine-protein kinase, active site | Serine/threonine/dual specificity protein kinase, catalytic domain	NO
AT1G13609	8	1:4662980-4663058	+	RI	0.46143	0.73245	-0.27102	0.996	K1	0.9999	Defensin-like (DEFL) family protein	Defensin-like (DEFL) family protein; LOCATED IN: endomembrane system; BEST Arabidopsis thaliana protein match is: Defensin-like (DEFL) family protein (TAIR:AT1G13607.1)		NO
AT1G13700	2	1:4695954-4695978	-	AD	0.97567	0.81692	0.15875	0.984	K2	1.4009	6-phosphogluconolactonase 1	6-phosphogluconolactonase 1 (PGL1); FUNCTIONS IN: 6-phosphogluconolactonase activity, catalytic activity; INVOLVED IN: pentose-phosphate shunt, carbohydrate metabolic process; LOCATED IN: cellular_component unknown; EXPRESSED IN: 11 plant structures; EXPRESSED DURING: LP.06 six leaves visible, LP.04 four leaves visible, 4 anthesis, petal differentiation and expansion stage; CONTAINS InterPro DOMA…	6-phosphogluconolactonase, DevB-type | Glucosamine/galactosamine-6-phosphate isomerase	NO
AT1G13700	3	1:4695725-4695953	-	AD	0.90696	0.30742	0.59955	1	K2	1.4009	6-phosphogluconolactonase 1	6-phosphogluconolactonase 1 (PGL1); FUNCTIONS IN: 6-phosphogluconolactonase activity, catalytic activity; INVOLVED IN: pentose-phosphate shunt, carbohydrate metabolic process; LOCATED IN: cellular_component unknown; EXPRESSED IN: 11 plant structures; EXPRESSED DURING: LP.06 six leaves visible, LP.04 four leaves visible, 4 anthesis, petal differentiation and expansion stage; CONTAINS InterPro DOMA…	6-phosphogluconolactonase, DevB-type | Glucosamine/galactosamine-6-phosphate isomerase	NO
AT1G13700	4	1:4695639-4695724	-	RI	0.88876	0.28851	0.60024	1	K2	1.4009	6-phosphogluconolactonase 1	6-phosphogluconolactonase 1 (PGL1); FUNCTIONS IN: 6-phosphogluconolactonase activity, catalytic activity; INVOLVED IN: pentose-phosphate shunt, carbohydrate metabolic process; LOCATED IN: cellular_component unknown; EXPRESSED IN: 11 plant structures; EXPRESSED DURING: LP.06 six leaves visible, LP.04 four leaves visible, 4 anthesis, petal differentiation and expansion stage; CONTAINS InterPro DOMA…	6-phosphogluconolactonase, DevB-type | Glucosamine/galactosamine-6-phosphate isomerase	NO
AT1G13700	8	1:4694973-4695208	-	RI	0.05154	0.1922	-0.14066	0.988	K1	0.783	6-phosphogluconolactonase 1	6-phosphogluconolactonase 1 (PGL1); FUNCTIONS IN: 6-phosphogluconolactonase activity, catalytic activity; INVOLVED IN: pentose-phosphate shunt, carbohydrate metabolic process; LOCATED IN: cellular_component unknown; EXPRESSED IN: 11 plant structures; EXPRESSED DURING: LP.06 six leaves visible, LP.04 four leaves visible, 4 anthesis, petal differentiation and expansion stage; CONTAINS InterPro DOMA…	6-phosphogluconolactonase, DevB-type | Glucosamine/galactosamine-6-phosphate isomerase	NO
AT1G13860	5	1:4746626-4746678	-	AD	0.22434	0.059948	0.16439	0.971	K1	0.8567	QUASIMODO2 LIKE 1	QUASIMODO2 LIKE 1 (QUL1); INVOLVED IN: biological_process unknown; LOCATED IN: plasma membrane; EXPRESSED IN: cultured cell; CONTAINS InterPro DOMAIN/s: Protein of unknown function DUF248, methyltransferase putative (InterPro:IPR004159); BEST Arabidopsis thaliana protein match is: QUASIMODO2 LIKE 2 (TAIR:AT2G03480.1)	Putative S-adenosyl-L-methionine-dependent methyltransferase | S-adenosyl-L-methionine-dependent methyltransferase-like	NO
AT1G13860	6	1:4746541-4746625	-	RI	0.16213	0.020623	0.14151	0.997	K2	1.3174	Encodes QUASIMODO2 LIKE1 (QUL1), a paralog of QUASIMODO2 (QUA2). AT1G78240 (QUA2), AT1G13860 (QUL1) and AT2G03480 (QUL2) form a clade with a possible role in plant vasculature development.			NO
AT1G13880	4	1:4749202-4749591	+	RI	0.95311	0.12128	0.83183	1	K2	0.5863	ELM2 domain-containing protein	ELM2 domain-containing protein; FUNCTIONS IN: DNA binding; INVOLVED IN: biological_process unknown; EXPRESSED IN: 24 plant structures; EXPRESSED DURING: 15 growth stages; CONTAINS InterPro DOMAIN/s: SANT, DNA-binding (InterPro:IPR001005), ELM2 (InterPro:IPR000949); BEST Arabidopsis thaliana protein match is: ELM2 domain-containing protein (TAIR:AT2G03470.2)	ELM2 domain | SANT/Myb domain	NO
AT1G13920	11	1:4759203-4759302	+	AD	0.95619	0.56549	0.3907	1	K3	2.3086	Remorin family protein	Remorin family protein; CONTAINS InterPro DOMAIN/s: Remorin, C-terminal (InterPro:IPR005516); BEST Arabidopsis thaliana protein match is: Remorin family protein (TAIR:AT1G69325.1)	Remorin, C-terminal	NO
AT1G13920	13	1:4759374-4759455	+	CE	0.95607	0.56456	0.39152	1	K3	2.3086	Remorin family protein	Remorin family protein; CONTAINS InterPro DOMAIN/s: Remorin, C-terminal (InterPro:IPR005516); BEST Arabidopsis thaliana protein match is: Remorin family protein (TAIR:AT1G69325.1)	Remorin, C-terminal	NO
AT1G13920	15	1:4759303-4759373	+	RI	0.71174	0.29834	0.4134	1	K3	2.3086	Remorin family protein	Remorin family protein; CONTAINS InterPro DOMAIN/s: Remorin, C-terminal (InterPro:IPR005516); BEST Arabidopsis thaliana protein match is: Remorin family protein (TAIR:AT1G69325.1)	Remorin, C-terminal	NO
AT1G13920	15	1:4759560-4759562	+	AA	0.91178	0.51295	0.39883	1	K3	2.3086	Remorin family protein	Remorin family protein; CONTAINS InterPro DOMAIN/s: Remorin, C-terminal (InterPro:IPR005516); BEST Arabidopsis thaliana protein match is: Remorin family protein (TAIR:AT1G69325.1)	Remorin, C-terminal	NO
AT1G13920	16	1:4759563-4759622	+	AA	0.95727	0.56513	0.39214	1	K3	2.3086	Remorin family protein	Remorin family protein; CONTAINS InterPro DOMAIN/s: Remorin, C-terminal (InterPro:IPR005516); BEST Arabidopsis thaliana protein match is: Remorin family protein (TAIR:AT1G69325.1)	Remorin, C-terminal	NO
AT1G13920	17	1:4759456-4759559	+	RI	0.79777	0.38961	0.40816	1	K3	2.3086	Remorin family protein	Remorin family protein; CONTAINS InterPro DOMAIN/s: Remorin, C-terminal (InterPro:IPR005516); BEST Arabidopsis thaliana protein match is: Remorin family protein (TAIR:AT1G69325.1)	Remorin, C-terminal	NO
AT1G14270	6	1:4876469-4876472	-	AA	0.608	0.41741	0.19059	0.991	K2	1.2797	CAAX amino terminal protease family protein	CAAX amino terminal protease family protein; INVOLVED IN: proteolysis; LOCATED IN: endomembrane system, membrane; LOCATED IN: membrane; EXPRESSED IN: 24 plant structures; EXPRESSED DURING: 15 growth stages; CONTAINS InterPro DOMAIN/s: Abortive infection protein (InterPro:IPR003675); BEST Arabidopsis thaliana protein match is: CAAX amino terminal protease family protein (TAIR:AT5G60750.1)	CAAX amino terminal protease	NO
AT1G14580	5	1:4989791-4990041	+	RI	0.72826	0.24018	0.48808	0.988	K2	1.4652	C2H2-like zinc finger protein	C2H2-like zinc finger protein; FUNCTIONS IN: sequence-specific DNA binding transcription factor activity, zinc ion binding, nucleic acid binding; LOCATED IN: intracellular; EXPRESSED IN: 7 plant structures; EXPRESSED DURING: LP.04 four leaves visible, LP.10 ten leaves visible, LP.02 two leaves visible, 4 leaf senescence stage; CONTAINS InterPro DOMAIN/s: Zinc finger, C2H2-like (InterPro:IPR015880…	Zinc finger C2H2-type/integrase DNA-binding domain | Zinc finger, C2H2 | Zinc finger, C2H2-like	NO
AT1G14685	4	1:5042856-5043076	+	RI	0.87621	0.70045	0.17576	0.959	K2	1.2463	basic pentacysteine 2	basic pentacysteine 2 (BPC2); CONTAINS InterPro DOMAIN/s: GAGA binding-like (InterPro:IPR010409); BEST Arabidopsis thaliana protein match is: basic pentacysteine1 (TAIR:AT2G01930.2)	GAGA-binding transcriptional activator	NO
AT1G14690	4	1:5054995-5055077	-	RI	0.44453	0.63138	-0.18685	0.943	K2	1.0587	microtubule-associated protein 65-7	microtubule-associated protein 65-7 (MAP65-7); FUNCTIONS IN: molecular_function unknown; INVOLVED IN: biological_process unknown; LOCATED IN: cellular_component unknown; CONTAINS InterPro DOMAIN/s: Microtubule-associated protein, MAP65/ASE1-type (InterPro:IPR007145); BEST Arabidopsis thaliana protein match is: Microtubule associated protein (MAP65/ASE1) family protein (TAIR:AT2G01910.1)	Microtubule-associated protein, MAP65/Ase1/PRC1	NO
AT1G14710	6	1:5064812-5064906	-	RI	0.64107	0.14738	0.49369	1	K1	0.9654	hydroxyproline-rich glycoprotein family protein	hydroxyproline-rich glycoprotein family protein; BEST Arabidopsis thaliana protein match is: oxidoreductase, 2OG-Fe(II) oxygenase family protein (TAIR:AT4G02940.1)	Alpha-ketoglutarate-dependent dioxygenase AlkB-like	NO
AT1G14770	5	1:5088443-5088614	-	RI	0.65173	0.13944	0.51229	1	K2	0.9912	RING/FYVE/PHD zinc finger superfamily protein	RING/FYVE/PHD zinc finger superfamily protein; FUNCTIONS IN: zinc ion binding; INVOLVED IN: biological_process unknown; LOCATED IN: cellular_component unknown; EXPRESSED IN: 13 plant structures; EXPRESSED DURING: 7 growth stages; CONTAINS InterPro DOMAIN/s: Zinc finger, PHD-type, conserved site (InterPro:IPR019786), Zinc finger, FYVE/PHD-type (InterPro:IPR011011); BEST Arabidopsis thaliana protei…	Zinc finger, FYVE/PHD-type | Zinc finger, PHD-type, conserved site | Zinc finger, RING/FYVE/PHD-type	NO
AT1G15110	5	1:5199267-5199380	+	RI	0.2087	0.05407	0.15463	0.942	K2	0.9791	phosphatidyl serine synthase family protein	phosphatidyl serine synthase family protein; FUNCTIONS IN: CDP-diacylglycerol-serine O-phosphatidyltransferase activity; INVOLVED IN: phosphatidylserine biosynthetic process; LOCATED IN: cellular_component unknown; EXPRESSED IN: 17 plant structures; EXPRESSED DURING: 7 growth stages; CONTAINS InterPro DOMAIN/s: Phosphatidyl serine synthase (InterPro:IPR004277)	Phosphatidyl serine synthase	NO
AT1G15750	8	1:5420539-5420573	-	CE	0.41166	0.19349	0.21817	1	K3	1.8968	Transducin family protein / WD-40 repeat family protein	TOPLESS (TPL); FUNCTIONS IN: protein binding, transcription repressor activity, protein homodimerization activity; INVOLVED IN: xylem and phloem pattern formation, response to auxin stimulus, primary shoot apical meristem specification, jasmonic acid mediated signaling pathway; LOCATED IN: cytosol, nucleus; EXPRESSED IN: 27 plant structures; EXPRESSED DURING: 15 growth stages; CONTAINS InterPro D…	CTLH, C-terminal LisH motif | LisH dimerisation motif | Topless family | WD40 repeat | WD40 repeat, conserved site | WD40-repeat-containing domain | WD40/YVTN repeat-like-containing domain	NO
AT1G15750	9	1:5420432-5420538	-	RI	0.2216	0.046178	0.17542	0.999	K4	1.8901	Transducin family protein / WD-40 repeat family protein	TOPLESS (TPL); FUNCTIONS IN: protein binding, transcription repressor activity, protein homodimerization activity; INVOLVED IN: xylem and phloem pattern formation, response to auxin stimulus, primary shoot apical meristem specification, jasmonic acid mediated signaling pathway; LOCATED IN: cytosol, nucleus; EXPRESSED IN: 27 plant structures; EXPRESSED DURING: 15 growth stages; CONTAINS InterPro D…	CTLH, C-terminal LisH motif | LisH dimerisation motif | Topless family | WD40 repeat | WD40 repeat, conserved site | WD40-repeat-containing domain | WD40/YVTN repeat-like-containing domain	NO
AT1G16060	11	1:5509384-5509593	+	RI	0.63274	0.2486	0.38414	0.944	K3	1.8566	ARIA-interacting double AP2 domain protein	ARIA-interacting double AP2 domain protein (ADAP); CONTAINS InterPro DOMAIN/s: DNA-binding, integrase-type (InterPro:IPR016177), Pathogenesis-related transcriptional factor/ERF, DNA-binding (InterPro:IPR001471); BEST Arabidopsis thaliana protein match is: Integrase-type DNA-binding superfamily protein (TAIR:AT1G79700.2)	AP2/ERF domain | DNA-binding domain	NO
AT1G16270	2	1:5563201-5563364	+	AD	0.085485	0.32941	-0.24392	0.988	K1	0.9468	Protein kinase superfamily protein with octicosapeptide/Phox/Bem1p domain	Protein kinase superfamily protein with octicosapeptide/Phox/Bem1p domain; FUNCTIONS IN: protein serine/threonine/tyrosine kinase activity, protein kinase activity; INVOLVED IN: protein amino acid phosphorylation; LOCATED IN: cytosol, nucleus; CONTAINS InterPro DOMAIN/s: Octicosapeptide/Phox/Bem1p (InterPro:IPR000270), Protein kinase, ATP binding site (InterPro:IPR017441), Protein kinase, catalyt…	Phox/Bem1p | Protein kinase domain | Protein kinase, ATP binding site | Protein kinase-like domain | Serine-threonine/tyrosine-protein kinase catalytic domain | Serine/threonine-protein kinase, active site	NO
AT1G16340	6	1:5590525-5590610	-	RI	0.25903	0.79705	-0.53802	1	K2	1.1862	Aldolase superfamily protein	ATKDSA2; FUNCTIONS IN: 3-deoxy-8-phosphooctulonate synthase activity; INVOLVED IN: metabolic process, rhamnogalacturonan II biosynthetic process; LOCATED IN: endomembrane system, cytoplasm; EXPRESSED IN: 18 plant structures; EXPRESSED DURING: 9 growth stages; CONTAINS InterPro DOMAIN/s: DAHP synthetase I/KDSA (InterPro:IPR006218), Aldolase-type TIM barrel (InterPro:IPR013785), 3-deoxy-8-phosphooc…	3-deoxy-8-phosphooctulonate synthase | Aldolase-type TIM barrel | DAHP synthetase I/KDSA	NO
AT1G16540	10	1:5661523-5661568	+	CE	0.78506	0.96642	-0.18136	0.941	K1	0.9523	molybdenum cofactor sulfurase (LOS5) (ABA3)	ABA DEFICIENT 3 (ABA3); CONTAINS InterPro DOMAIN/s: Pyridoxal phosphate-dependent transferase, major domain (InterPro:IPR015424), MOSC, N-terminal beta barrel (InterPro:IPR005303), Aminotransferase, class V/Cysteine desulfurase (InterPro:IPR000192), Molybdenum cofactor sulfurase, C-terminal (InterPro:IPR005302), Pyridoxal phosphate-dependent transferase, major region, subdomain 1 (InterPro:IPR015…	Aminotransferase class V domain | MOSC, N-terminal beta barrel | Molybdenum cofactor sulfurase | Molybdenum cofactor sulfurase, C-terminal | Pyridoxal phosphate-dependent transferase | Pyridoxal phosphate-dependent transferase, major region, subdomain 1 | Pyridoxal phosphate-dependent transferase, major region, subdomain 2 | Pyruvate kinase-like, insert domain	NO
AT1G16780	21	1:5741127-5741309	-	RI	0.11122	0.29972	-0.1885	0.974	K1	0.896	Inorganic H pyrophosphatase family protein	VHP2;2; FUNCTIONS IN: inorganic diphosphatase activity, hydrogen-translocating pyrophosphatase activity; INVOLVED IN: proton transport; LOCATED IN: Golgi apparatus, vacuole; EXPRESSED IN: 22 plant structures; EXPRESSED DURING: 13 growth stages; CONTAINS InterPro DOMAIN/s: Inorganic H+ pyrophosphatase (InterPro:IPR004131); BEST Arabidopsis thaliana protein match is: vacuolar H+-pyrophosphatase 2 (…		NO
AT1G16820	4	1:5757570-5758185	-	RI	0.83687	0.32498	0.51189	1	K2	1.5577	vacuolar ATP synthase catalytic subunit-related / V-ATPase-related / vacuolar proton pump-related	vacuolar ATP synthase catalytic subunit-related / V-ATPase-related / vacuolar proton pump-related; EXPRESSED IN: 16 plant structures; LOCATED IN: plasma membrane, vacuole; EXPRESSED DURING: 8 growth stages; EXPRESSED IN: 17 plant structures; BEST Arabidopsis thaliana protein match is: vacuolar ATP synthase subunit A (TAIR:AT1G78900.2)		NO
AT1G16930	7	1:5789854-5789929	+	RI	0.47667	0.29842	0.17825	0.928	K3	2.0265	F-box/RNI-like/FBD-like domains-containing protein	F-box/RNI-like/FBD-like domains-containing protein; CONTAINS InterPro DOMAIN/s: FBD (InterPro:IPR013596), F-box domain, cyclin-like (InterPro:IPR001810), F-box domain, Skp2-like (InterPro:IPR022364), FBD-like (InterPro:IPR006566), Leucine-rich repeat 2 (InterPro:IPR013101); BEST Arabidopsis thaliana protein match is: F-box/RNI-like/FBD-like domains-containing protein (TAIR:AT1G80470.1)	F-box domain | FBD domain | Leucine-rich repeat 2	NO
AT1G16960	5	1:5800032-5800161	+	RI	0.89582	0.62831	0.26751	1	K2	1.3258	Ubiquitin domain-containing protein	Ubiquitin domain-containing protein; FUNCTIONS IN: molecular_function unknown; INVOLVED IN: N-terminal protein myristoylation; LOCATED IN: cellular_component unknown; BEST Arabidopsis thaliana protein match is: Ubiquitin domain-containing protein (TAIR:AT1G53400.1)		NO
AT1G17145	5	1:5862259-5862517	-	RI	0.2339	0.049106	0.18479	0.996	K1	0.8841	RING/U-box superfamily protein	RING/U-box superfamily protein; FUNCTIONS IN: zinc ion binding; INVOLVED IN: biological_process unknown; LOCATED IN: cellular_component unknown; EXPRESSED IN: 24 plant structures; EXPRESSED DURING: 15 growth stages; CONTAINS InterPro DOMAIN/s: Zinc finger, RING-type (InterPro:IPR001841); BEST Arabidopsis thaliana protein match is: RING/U-box superfamily protein (TAIR:AT1G78420.2)	Zinc finger, RING-type | Zinc finger, RING/FYVE/PHD-type	NO
AT1G17590	13	1:6051088-6051294	-	RI	0.20499	0.39367	-0.18869	0.933	K1	0.9918	nuclear factor Y, subunit A8	nuclear factor Y, subunit A8 (NF-YA8); FUNCTIONS IN: sequence-specific DNA binding transcription factor activity; INVOLVED IN: regulation of transcription, DNA-dependent; LOCATED IN: CCAAT-binding factor complex, nucleus, chloroplast; EXPRESSED IN: 8 plant structures; EXPRESSED DURING: petal differentiation and expansion stage, E expanded cotyledon stage, D bilateral stage; CONTAINS InterPro DOMA…	CCAAT-binding factor, conserved site | CCAAT-binding transcription factor, subunit B	NO
AT1G17640	5	1:6069105-6069110	-	AA	0.71468	0.90683	-0.19215	0.98	K3	1.457	RNA-binding (RRM/RBD/RNP motifs) family protein	RNA-binding (RRM/RBD/RNP motifs) family protein; FUNCTIONS IN: RNA binding, nucleotide binding, nucleic acid binding; INVOLVED IN: biological_process unknown; LOCATED IN: cellular_component unknown; EXPRESSED IN: 15 plant structures; EXPRESSED DURING: 7 growth stages; CONTAINS InterPro DOMAIN/s: RNA recognition motif, RNP-1 (InterPro:IPR000504), Nucleotide-binding, alpha-beta plait (InterPro:IPR0…	Nucleotide-binding, alpha-beta plait | RNA recognition motif domain	NO
AT1G17760	14	1:6114920-6115034	-	RI	0.092723	0.20835	-0.11563	0.928	K1	0.8264	Tetratricopeptide repeat (TPR)-like superfamily protein	CSTF77; FUNCTIONS IN: protein binding, mRNA binding, transcription repressor activity; INVOLVED IN: RNA 3'-end processing, mRNA processing, embryo sac development; LOCATED IN: intracellular, nucleus; EXPRESSED IN: 23 plant structures; EXPRESSED DURING: 12 growth stages; CONTAINS InterPro DOMAIN/s: RNA-processing protein, HAT helix (InterPro:IPR003107), Tetratricopeptide-like helical (InterPro:IPR…	HAT (Half-A-TPR) repeat | Suppressor of forked | Tetratricopeptide repeat | Tetratricopeptide repeat-containing domain | Tetratricopeptide-like helical domain	NO
AT1G17940	9	1:6172500-6172714	-	RI	0.32407	0.12673	0.19734	0.922	K2	1.5155	Endosomal targeting BRO1-like domain-containing protein	Endosomal targeting BRO1-like domain-containing protein; FUNCTIONS IN: molecular_function unknown; INVOLVED IN: N-terminal protein myristoylation; LOCATED IN: cellular_component unknown; CONTAINS InterPro DOMAIN/s: BRO1 (InterPro:IPR004328); BEST Arabidopsis thaliana protein match is: Endosomal targeting BRO1-like domain-containing protein (TAIR:AT1G73390.3)	BRO1 domain	NO
AT1G17970	4	1:6185605-6186170	+	RI	0.21526	0.097054	0.1182	0.944	K1	0.7434	RING/U-box superfamily protein	RING/U-box superfamily protein; FUNCTIONS IN: zinc ion binding; EXPRESSED IN: 20 plant structures; EXPRESSED DURING: 13 growth stages; CONTAINS InterPro DOMAIN/s: Zinc finger, RING-type (InterPro:IPR001841), Zinc finger, C3HC4 RING-type (InterPro:IPR018957); BEST Arabidopsis thaliana protein match is: RING/U-box superfamily protein (TAIR:AT1G73760.1)	Zinc finger, RING-type | Zinc finger, RING/FYVE/PHD-type	NO
AT1G18090	6	1:6225149-6225152	+	AD	0.53805	0.27532	0.26273	0.951	K1	1	5'-3' exonuclease family protein	5'-3' exonuclease family protein; FUNCTIONS IN: DNA binding, catalytic activity, nuclease activity; INVOLVED IN: DNA repair; LOCATED IN: cellular_component unknown; EXPRESSED IN: 22 plant structures; EXPRESSED DURING: 14 growth stages; CONTAINS InterPro DOMAIN/s: XPG conserved site (InterPro:IPR019974), XPG N-terminal (InterPro:IPR006085), DNA repair protein (XPGC)/yeast Rad (InterPro:IPR006084),…	5'-3' exonuclease, C-terminal domain | Helix-hairpin-helix motif, class 2 | PIN domain-like | XPG N-terminal | XPG conserved site | XPG-I domain	NO
AT1G18090	7	1:6225246-6225249	+	AA	0.46177	0.73025	-0.26847	0.929	K1	1	5'-3' exonuclease family protein	5'-3' exonuclease family protein; FUNCTIONS IN: DNA binding, catalytic activity, nuclease activity; INVOLVED IN: DNA repair; LOCATED IN: cellular_component unknown; EXPRESSED IN: 22 plant structures; EXPRESSED DURING: 14 growth stages; CONTAINS InterPro DOMAIN/s: XPG conserved site (InterPro:IPR019974), XPG N-terminal (InterPro:IPR006085), DNA repair protein (XPGC)/yeast Rad (InterPro:IPR006084),…	5'-3' exonuclease, C-terminal domain | Helix-hairpin-helix motif, class 2 | PIN domain-like | XPG N-terminal | XPG conserved site | XPG-I domain	NO
AT1G18200	5	1:6265885-6266438	-	RI	0.42765	0.74528	-0.31763	0.964	K1	0.9993	RAB GTPase homolog A6B	RAB GTPase homolog A6B (RABA6b); FUNCTIONS IN: GTP binding, GTPase activity; INVOLVED IN: intracellular protein transport, signal transduction, nucleocytoplasmic transport, protein transport, small GTPase mediated signal transduction; LOCATED IN: intracellular; CONTAINS InterPro DOMAIN/s: Ran GTPase (InterPro:IPR002041), Ras (InterPro:IPR013753), Ras small GTPase, Ras type (InterPro:IPR003577), R…	P-loop containing nucleoside triphosphate hydrolase | Small GTP-binding protein domain | Small GTPase superfamily | Small GTPase superfamily, Rab type	NO
AT1G18330	4	1:6307695-6307809	-	RI	0.2074	0.047797	0.1596	0.988	K1	0.8481	Homeodomain-like superfamily protein	EARLY-PHYTOCHROME-RESPONSIVE1 (EPR1); CONTAINS InterPro DOMAIN/s: SANT, DNA-binding (InterPro:IPR001005), Homeodomain-like (InterPro:IPR009057), Myb, DNA-binding (InterPro:IPR014778), HTH transcriptional regulator, Myb-type, DNA-binding (InterPro:IPR017930), Myb-like DNA-binding domain, SHAQKYF class (InterPro:IPR006447); BEST Arabidopsis thaliana protein match is: Homeodomain-like superfamily pr…	Homeodomain-like | Myb domain | Myb domain, plants | SANT/Myb domain	NO
AT1G18360	3	1:6318197-6318815	-	RI	0.39653	0.22044	0.17609	0.957	K1	0.9832	alpha/beta-Hydrolases superfamily protein	alpha/beta-Hydrolases superfamily protein; FUNCTIONS IN: hydrolase activity; LOCATED IN: chloroplast; EXPRESSED IN: 22 plant structures; EXPRESSED DURING: 13 growth stages; BEST Arabidopsis thaliana protein match is: alpha/beta-Hydrolases superfamily protein (TAIR:AT1G73480.1)	Alpha/Beta hydrolase fold | Putative lysophospholipase	NO
AT1G18415	12	1:6343950-6343982	-	AD	0.43098	0.68473	-0.25376	0.919	K2	1.5754	other RNA			NO
AT1G18415	6	1:6344785-6344816	-	AD	0.42319	0.69042	-0.26723	0.924	K2	1.5479	other RNA			NO
AT1G18415	8	1:6344693-6344715	-	AA	0.57508	0.31015	0.26493	0.938	K2	1.5479	other RNA			NO
AT1G18620	7	1:6410217-6410340	+	RI	0.85848	0.25616	0.60232	1	K3	1.2868		unknown protein; FUNCTIONS IN: molecular_function unknown; INVOLVED IN: biological_process unknown; LOCATED IN: cellular_component unknown; EXPRESSED IN: 22 plant structures; EXPRESSED DURING: 13 growth stages; BEST Arabidopsis thaliana protein match is: unknown protein (TAIR:AT1G74160.1)	Domain of unknown function DUF4378	NO
AT1G18620	8	1:6410341-6410557	+	AA	0.87004	0.2823	0.58774	1	K3	1.2868		unknown protein; FUNCTIONS IN: molecular_function unknown; INVOLVED IN: biological_process unknown; LOCATED IN: cellular_component unknown; EXPRESSED IN: 22 plant structures; EXPRESSED DURING: 13 growth stages; BEST Arabidopsis thaliana protein match is: unknown protein (TAIR:AT1G74160.1)	Domain of unknown function DUF4378	NO
AT1G19080	3	1:6584426-6584452	+	AA	0.4053	0.5331	-0.1278	0.963	K4	1.7249	GINS complex protein	TITAN 10 (TTN10); FUNCTIONS IN: molecular_function unknown; INVOLVED IN: DNA-dependent DNA replication, embryo development ending in seed dormancy; LOCATED IN: GINS complex; EXPRESSED IN: pollen tube; CONTAINS InterPro DOMAIN/s: GINS complex, subunit Psf3 (InterPro:IPR010492), GINS complex (InterPro:IPR021151); BEST Arabidopsis thaliana protein match is: GINS complex protein (TAIR:AT3G55490.1)	GINS complex | GINS complex, subunit Psf3	NO
AT1G19080	4	1:6584453-6584556	+	CE	0.45916	0.588	-0.12884	0.94	K4	1.7249	GINS complex protein	TITAN 10 (TTN10); FUNCTIONS IN: molecular_function unknown; INVOLVED IN: DNA-dependent DNA replication, embryo development ending in seed dormancy; LOCATED IN: GINS complex; EXPRESSED IN: pollen tube; CONTAINS InterPro DOMAIN/s: GINS complex, subunit Psf3 (InterPro:IPR010492), GINS complex (InterPro:IPR021151); BEST Arabidopsis thaliana protein match is: GINS complex protein (TAIR:AT3G55490.1)	GINS complex | GINS complex, subunit Psf3	NO
AT1G19200	3	1:6625721-6625843	-	EI/RI	0.5152	0.911	-0.3958	0.999	K1	0.9957	Protein of unknown function (DUF581)	Protein of unknown function (DUF581); CONTAINS InterPro DOMAIN/s: Protein of unknown function DUF581 (InterPro:IPR007650); BEST Arabidopsis thaliana protein match is: Protein of unknown function (DUF581) (TAIR:AT1G74940.1)	zf-FLZ domain	NO
AT1G19200	3	1:6625721-6625843	-	RI	0.5152	0.911	-0.3958	0.999	K1	0.9957	Protein of unknown function (DUF581)	Protein of unknown function (DUF581); CONTAINS InterPro DOMAIN/s: Protein of unknown function DUF581 (InterPro:IPR007650); BEST Arabidopsis thaliana protein match is: Protein of unknown function (DUF581) (TAIR:AT1G74940.1)	zf-FLZ domain	NO
AT1G19350	6	1:6688739-6688774	+	RI	0.50546	0.35484	0.15062	0.993	K3	1.5856	Brassinosteroid signalling positive regulator (BZR1) family protein	BRI1-EMS-SUPPRESSOR 1 (BES1); CONTAINS InterPro DOMAIN/s: BZR1, transcriptional repressor (InterPro:IPR008540); BEST Arabidopsis thaliana protein match is: Brassinosteroid signalling positive regulator (BZR1) family protein (TAIR:AT1G75080.2)	BZR1, transcriptional repressor	NO
AT1G19360	3	1:6692298-6692382	-	RI	0.48553	0.86138	-0.37584	1	K1	0.9997	Nucleotide-diphospho-sugar transferase family protein	Nucleotide-diphospho-sugar transferase family protein; LOCATED IN: endoplasmic reticulum; EXPRESSED IN: 23 plant structures; EXPRESSED DURING: 13 growth stages; CONTAINS InterPro DOMAIN/s: Reticulon (InterPro:IPR003388), Nucleotide-diphospho-sugar transferase, predicted (InterPro:IPR005069); BEST Arabidopsis thaliana protein match is: Nucleotide-diphospho-sugar transferase family protein (TAIR:AT…	Nucleotide-diphospho-sugar transferase | Nucleotide-diphospho-sugar transferases | Reticulon	NO
AT1G19400	3	1:6714086-6714168	-	AD	0.61994	0.33746	0.28247	1	K3	1.3201	Erythronate-4-phosphate dehydrogenase family protein	Erythronate-4-phosphate dehydrogenase family protein; BEST Arabidopsis thaliana protein match is: Erythronate-4-phosphate dehydrogenase family protein (TAIR:AT1G75180.3)		NO
AT1G19400	4	1:6713788-6714085	-	RI	0.60791	0.3183	0.28961	1	K4	1.4724	Erythronate-4-phosphate dehydrogenase family protein	Erythronate-4-phosphate dehydrogenase family protein; BEST Arabidopsis thaliana protein match is: Erythronate-4-phosphate dehydrogenase family protein (TAIR:AT1G75180.3)		NO
AT1G19485	17	1:6749003-6749160	+	RI	0.62067	0.72656	-0.10589	0.917	K1	0.9774	Transducin/WD40 repeat-like superfamily protein	Transducin/WD40 repeat-like superfamily protein; FUNCTIONS IN: DNA binding; INVOLVED IN: regulation of transcription, DNA-dependent; LOCATED IN: CUL4 RING ubiquitin ligase complex; EXPRESSED IN: 22 plant structures; EXPRESSED IN: 23 plant structures; EXPRESSED DURING: 13 growth stages; CONTAINS InterPro DOMAIN/s: A.T hook-like (InterPro:IPR020478), AT hook, DNA-binding motif (InterPro:IPR017956),…	AT hook, DNA-binding motif | AT hook-like | HMG-I/HMG-Y, DNA-binding, conserved site | WD40 repeat | WD40-repeat-containing domain | WD40/YVTN repeat-like-containing domain	NO
AT1G19660	5	1:6802326-6802561	-	RI	0.14368	0.014049	0.12963	1	K2	0.7245	Wound-responsive family protein	Wound-responsive family protein; FUNCTIONS IN: DNA binding, nuclease activity; INVOLVED IN: response to wounding, nucleotide-excision repair; EXPRESSED IN: ovule; CONTAINS InterPro DOMAIN/s: Protein of unknown function DUF151 (InterPro:IPR003729), UvrB/UvrC protein (InterPro:IPR001943); BEST Arabidopsis thaliana protein match is: bifunctional nuclease in basal defense response 1 (TAIR:AT1G75380.3)	Bifunctional nuclease domain | UVR domain	NO
AT1G19660	6	1:6802248-6802325	-	AA	0.14806	0.019585	0.12848	1	K2	0.7245	Wound-responsive family protein	Wound-responsive family protein; FUNCTIONS IN: DNA binding, nuclease activity; INVOLVED IN: response to wounding, nucleotide-excision repair; EXPRESSED IN: ovule; CONTAINS InterPro DOMAIN/s: Protein of unknown function DUF151 (InterPro:IPR003729), UvrB/UvrC protein (InterPro:IPR001943); BEST Arabidopsis thaliana protein match is: bifunctional nuclease in basal defense response 1 (TAIR:AT1G75380.3)	Bifunctional nuclease domain | UVR domain	NO
AT1G19700	5	1:6812204-6812500	-	AD	0.4742	0.09351	0.38069	1	K2	1.3577	BEL1-like homeodomain 10	BEL1-like homeodomain 10 (BEL10); FUNCTIONS IN: DNA binding, sequence-specific DNA binding transcription factor activity; INVOLVED IN: regulation of transcription, DNA-dependent, regulation of transcription; LOCATED IN: nucleus; EXPRESSED IN: 20 plant structures; EXPRESSED DURING: 11 growth stages; CONTAINS InterPro DOMAIN/s: Homeobox (InterPro:IPR001356), Homeodomain-like (InterPro:IPR009057), P…	Homeobox KN domain | Homeobox domain | Homeodomain-like | POX domain	NO
AT1G19700	7	1:6811928-6812203	-	RI	0.86038	0.10812	0.75226	1	K2	1.5293	BEL1-like homeodomain 10	BEL1-like homeodomain 10 (BEL10); FUNCTIONS IN: DNA binding, sequence-specific DNA binding transcription factor activity; INVOLVED IN: regulation of transcription, DNA-dependent, regulation of transcription; LOCATED IN: nucleus; EXPRESSED IN: 20 plant structures; EXPRESSED DURING: 11 growth stages; CONTAINS InterPro DOMAIN/s: Homeobox (InterPro:IPR001356), Homeodomain-like (InterPro:IPR009057), P…	Homeobox KN domain | Homeobox domain | Homeodomain-like | POX domain	NO
AT1G20090	3	1:6967319-6967616	+	RI	0.20658	0.059047	0.14753	0.999	K1	0.8031	RHO-related protein from plants 2	RHO-related protein from plants 2 (ROP2); CONTAINS InterPro DOMAIN/s: Small GTP-binding protein (InterPro:IPR005225), Ras GTPase (InterPro:IPR001806), Ras (InterPro:IPR013753), Ras small GTPase, Rab type (InterPro:IPR003579), Ras small GTPase, Ras type (InterPro:IPR003577), Small GTPase, Rho type (InterPro:IPR003578); BEST Arabidopsis thaliana protein match is: RAC-like GTP binding protein 5 (TAI…	P-loop containing nucleoside triphosphate hydrolase | Small GTP-binding protein domain | Small GTPase superfamily | Small GTPase superfamily, Rho type	NO
AT1G20100	3	1:6970180-6970618	-	RI	0.96767	0.59579	0.37187	1	K1	0.9983		unknown protein; FUNCTIONS IN: molecular_function unknown; INVOLVED IN: biological_process unknown; EXPRESSED IN: 24 plant structures; EXPRESSED DURING: 15 growth stages; BEST Arabidopsis thaliana protein match is: unknown protein (TAIR:AT1G75860.1)		NO
AT1G20610	2	1:7137292-7137539	-	RI	0.22438	0.041772	0.18261	0.988	K1	0.8354	Cyclin B2;3	Cyclin B2;3 (CYCB2;3); FUNCTIONS IN: cyclin-dependent protein kinase regulator activity; INVOLVED IN: regulation of cell cycle; LOCATED IN: nucleus; CONTAINS InterPro DOMAIN/s: Cyclin, C-terminal (InterPro:IPR004367), Cyclin-like (InterPro:IPR011028), Cyclin-related (InterPro:IPR013763), Cyclin, N-terminal (InterPro:IPR006671), Cyclin, A/B/D/E (InterPro:IPR014400), Cyclin (InterPro:IPR006670); BE…	Cyclin A/B/D/E/F | Cyclin, C-terminal domain | Cyclin, N-terminal | Cyclin-like	NO
AT1G20640	10	1:7155090-7155169	+	RI	0.38426	0.10193	0.28233	0.983	K1	0.9997	Plant regulator RWP-RK family protein	Plant regulator RWP-RK family protein; CONTAINS InterPro DOMAIN/s: Octicosapeptide/Phox/Bem1p (InterPro:IPR000270), Plant regulator RWP-RK (InterPro:IPR003035); BEST Arabidopsis thaliana protein match is: Plant regulator RWP-RK family protein (TAIR:AT1G76350.1)	Phox/Bem1p | RWP-RK domain	NO
AT1G20780	9	1:7217637-7217793	+	RI	0.7479	0.33516	0.41274	0.984	K2	1.9039	senescence-associated E3 ubiquitin ligase 1	senescence-associated E3 ubiquitin ligase 1 (SAUL1); FUNCTIONS IN: ubiquitin-protein ligase activity; INVOLVED IN: regulation of chlorophyll catabolic process, regulation of chlorophyll biosynthetic process, leaf senescence, regulation of abscisic acid biosynthetic process; LOCATED IN: plasma membrane; EXPRESSED IN: 9 plant structures; EXPRESSED DURING: 7 growth stages; CONTAINS InterPro DOMAIN/s…	Armadillo | Armadillo-like helical | Armadillo-type fold | U box domain | Zinc finger, RING/FYVE/PHD-type	NO
AT1G20840	3	1:7248215-7248333	-	RI	0.47514	0.87643	-0.40128	0.951	K1	0.9799	tonoplast monosaccharide transporter1	tonoplast monosaccharide transporter1 (TMT1); FUNCTIONS IN: carbohydrate transmembrane transporter activity, sugar:hydrogen symporter activity, nucleoside transmembrane transporter activity; INVOLVED IN: in 6 processes; LOCATED IN: plant-type vacuole membrane, plasma membrane, vacuole, membrane; EXPRESSED IN: 30 plant structures; EXPRESSED DURING: 15 growth stages; CONTAINS InterPro DOMAIN/s: Sug…	General substrate transporter | Major facilitator superfamily domain | Major facilitator superfamily domain, general substrate transporter | Sugar transporter, conserved site | Sugar/inositol transporter	NO
AT1G20920	8	1:7288844-7288999	+	RI	0.16238	0.30934	-0.14697	0.938	K4	2.4089	P-loop containing nucleoside triphosphate hydrolases superfamily protein	P-loop containing nucleoside triphosphate hydrolases superfamily protein; FUNCTIONS IN: helicase activity, ATP-dependent helicase activity, ATP binding, nucleic acid binding; FUNCTIONS IN: helicase activity, nucleic acid binding, ATP-dependent helicase activity, ATP binding; EXPRESSED IN: 25 plant structures; EXPRESSED DURING: 14 growth stages; CONTAINS InterPro DOMAIN/s: DNA/RNA helicase, DEAD/D…	DEAD/DEAH box helicase domain | Helicase, C-terminal | Helicase, superfamily 1/2, ATP-binding domain | P-loop containing nucleoside triphosphate hydrolase | RNA helicase, ATP-dependent, DEAD-box, conserved site | RNA helicase, DEAD-box type, Q motif	NO
AT1G21160	2	1:7412482-7412604	-	RI	0.028092	0.13281	-0.10472	0.947	K1	0.6136	eukaryotic translation initiation factor 2 (eIF-2) family protein	eukaryotic translation initiation factor 2 (eIF-2) family protein; FUNCTIONS IN: GTP binding, GTPase activity, translation initiation factor activity; INVOLVED IN: biological_process unknown; LOCATED IN: cellular_component unknown; EXPRESSED IN: 24 plant structures; EXPRESSED DURING: 13 growth stages; CONTAINS InterPro DOMAIN/s: Small GTP-binding protein (InterPro:IPR005225), Translation elongati…	Elongation factor, GTP-binding domain | P-loop containing nucleoside triphosphate hydrolase | RNA-binding domain, S1 | Small GTP-binding protein domain | Translation elongation factor EFTu/EF1A, domain 2 | Translation initiation factor IF- 2, domain 3 | Translation protein, beta-barrel domain	NO
AT1G21170	12	1:7415969-7415993	+	AA	0.9615	0.85115	0.11035	0.947	K1	0.6699	Exocyst complex component SEC5	SEC5B; BEST Arabidopsis thaliana protein match is: exocyst complex component sec5 (TAIR:AT1G76850.1)	Cullin repeat-like-containing domain | Exocyst complex component Sec5	NO
AT1G21450	3	1:7509176-7509710	+	RI	0.22169	0.036395	0.1853	0.981	K2	1.1898	SCARECROW-like 1	SCARECROW-like 1 (SCL1); FUNCTIONS IN: sequence-specific DNA binding transcription factor activity; INVOLVED IN: regulation of transcription; EXPRESSED IN: 22 plant structures; EXPRESSED DURING: 14 growth stages; CONTAINS InterPro DOMAIN/s: Transcription factor GRAS (InterPro:IPR005202); BEST Arabidopsis thaliana protein match is: GRAS family transcription factor (TAIR:AT5G48150.2)	Transcription factor GRAS	NO
AT1G21610	15	1:7576381-7576584	+	RI	0.17873	0.30485	-0.12612	0.953	K1	0.9427	wound-responsive family protein	wound-responsive family protein; FUNCTIONS IN: molecular_function unknown; INVOLVED IN: response to wounding; LOCATED IN: cellular_component unknown; EXPRESSED IN: 24 plant structures; EXPRESSED DURING: 14 growth stages; BEST Arabidopsis thaliana protein match is: unknown protein (TAIR:AT1G77310.1)	Hpc2-related domain | Ubinuclein/Yemanuclein	NO
AT1G21840	5	1:7666570-7666843	+	RI	0.95371	0.77185	0.18186	0.962	K1	0.9226	urease accessory protein F	urease accessory protein F (UREF); FUNCTIONS IN: nickel ion binding; INVOLVED IN: nitrogen compound metabolic process, positive regulation of metalloenzyme activity; LOCATED IN: cellular_component unknown; EXPRESSED IN: 23 plant structures; EXPRESSED DURING: 13 growth stages; CONTAINS InterPro DOMAIN/s: Urease accessory protein UreF (InterPro:IPR002639)	Urease accessory protein UreF	NO
AT1G22180	5	1:7829752-7830150	-	RI	0.44649	0.10511	0.34139	0.999	K3	1.9222	Sec14p-like phosphatidylinositol transfer family protein	Sec14p-like phosphatidylinositol transfer family protein; CONTAINS InterPro DOMAIN/s: Cellular retinaldehyde-binding/triple function, C-terminal (InterPro:IPR001251); CONTAINS InterPro DOMAIN/s: Cellular retinaldehyde-binding/triple function, C-terminal (InterPro:IPR001251), Cellular retinaldehyde-binding/triple function, N-terminal (InterPro:IPR008273), Phosphatidylinositol transfer protein-like…	CRAL-TRIO domain | CRAL/TRIO, N-terminal domain	NO
AT1G22180	7	1:7829671-7829747	-	CE	0.97242	0.64913	0.32328	1	K3	1.9195	Sec14p-like phosphatidylinositol transfer family protein	Sec14p-like phosphatidylinositol transfer family protein; CONTAINS InterPro DOMAIN/s: Cellular retinaldehyde-binding/triple function, C-terminal (InterPro:IPR001251); CONTAINS InterPro DOMAIN/s: Cellular retinaldehyde-binding/triple function, C-terminal (InterPro:IPR001251), Cellular retinaldehyde-binding/triple function, N-terminal (InterPro:IPR008273), Phosphatidylinositol transfer protein-like…	CRAL-TRIO domain | CRAL/TRIO, N-terminal domain	NO
AT1G22310	6	1:7883126-7883196	-	EI/RI	0.80341	0.64316	0.16026	0.923	K1	0.975	methyl-CPG-binding domain 8	methyl-CPG-binding domain 8 (MBD8); FUNCTIONS IN: methyl-CpG binding; INVOLVED IN: biological_process unknown; LOCATED IN: nucleus; EXPRESSED IN: 23 plant structures; EXPRESSED DURING: 13 growth stages; CONTAINS InterPro DOMAIN/s: A.T hook-like (InterPro:IPR020478), AT hook, DNA-binding motif (InterPro:IPR017956), DNA-binding, integrase-type (InterPro:IPR016177), Methyl-CpG DNA binding (InterPro:…	AT hook, DNA-binding motif | DNA-binding domain | Methyl-CpG DNA binding	NO
AT1G22310	6	1:7883126-7883196	-	RI	0.80341	0.64316	0.16026	0.923	K1	0.975	methyl-CPG-binding domain 8	methyl-CPG-binding domain 8 (MBD8); FUNCTIONS IN: methyl-CpG binding; INVOLVED IN: biological_process unknown; LOCATED IN: nucleus; EXPRESSED IN: 23 plant structures; EXPRESSED DURING: 13 growth stages; CONTAINS InterPro DOMAIN/s: A.T hook-like (InterPro:IPR020478), AT hook, DNA-binding motif (InterPro:IPR017956), DNA-binding, integrase-type (InterPro:IPR016177), Methyl-CpG DNA binding (InterPro:…	AT hook, DNA-binding motif | DNA-binding domain | Methyl-CpG DNA binding	NO
AT1G22403	3	1:7908913-7909291	-	RI	0.69129	0.53556	0.15573	0.929	K1	0.9974	other RNA			NO
AT1G22590	4	1:7981949-7982044	+	RI	0.51605	0.11576	0.40029	1	K2	0.9989	AGAMOUS-like 87	AGAMOUS-like 87 (AGL87); FUNCTIONS IN: sequence-specific DNA binding transcription factor activity; INVOLVED IN: regulation of transcription; LOCATED IN: nucleus; EXPRESSED IN: 19 plant structures; EXPRESSED DURING: 13 growth stages; CONTAINS InterPro DOMAIN/s: Transcription factor, MADS-box (InterPro:IPR002100); BEST Arabidopsis thaliana protein match is: MADS-box transcription factor family pro…	Transcription factor, MADS-box	NO
AT1G22650	3	1:8015685-8015911	-	RI	0.50293	0.13706	0.36587	0.981	K1	0.9932	Plant neutral invertase family protein	Plant neutral invertase family protein; FUNCTIONS IN: catalytic activity, beta-fructofuranosidase activity; INVOLVED IN: sucrose catabolic process, using beta-fructofuranosidase; LOCATED IN: cellular_component unknown; EXPRESSED IN: 19 plant structures; EXPRESSED DURING: 14 growth stages; CONTAINS InterPro DOMAIN/s: Plant neutral invertase (InterPro:IPR006937), Six-hairpin glycosidase-like (Inter…	Glycosyl hydrolase family 100 | Six-hairpin glycosidase-like	NO
AT1G22880	3	1:8095965-8096045	+	RI	0.79675	0.94246	-0.14571	0.977	K1	0.8323	cellulase 5	cellulase 5 (CEL5); FUNCTIONS IN: hydrolase activity, hydrolyzing O-glycosyl compounds, catalytic activity; INVOLVED IN: carbohydrate metabolic process; LOCATED IN: cell wall, plasma membrane, plant-type cell wall; EXPRESSED IN: root; CONTAINS InterPro DOMAIN/s: Six-hairpin glycosidase (InterPro:IPR012341), Glycoside hydrolase, family 9, active site (InterPro:IPR018221), Six-hairpin glycosidase-l…	Glycoside hydrolase, family 9 | Glycoside hydrolase, family 9, active site | Six-hairpin glycosidase | Six-hairpin glycosidase-like	NO
AT1G22880	7	1:8096787-8096864	+	RI	0.75372	0.92173	-0.168	0.924	K1	0.9229	cellulase 5	cellulase 5 (CEL5); FUNCTIONS IN: hydrolase activity, hydrolyzing O-glycosyl compounds, catalytic activity; INVOLVED IN: carbohydrate metabolic process; LOCATED IN: cell wall, plasma membrane, plant-type cell wall; EXPRESSED IN: root; CONTAINS InterPro DOMAIN/s: Six-hairpin glycosidase (InterPro:IPR012341), Glycoside hydrolase, family 9, active site (InterPro:IPR018221), Six-hairpin glycosidase-l…	Glycoside hydrolase, family 9 | Glycoside hydrolase, family 9, active site | Six-hairpin glycosidase | Six-hairpin glycosidase-like	NO
AT1G22885	3	1:8101714-8102032	+	RI	0.2034	0.056955	0.14644	0.999	K1	0.7733		unknown protein; FUNCTIONS IN: molecular_function unknown; INVOLVED IN: biological_process unknown; LOCATED IN: endomembrane system; EXPRESSED IN: 22 plant structures; EXPRESSED DURING: 13 growth stages		NO
AT1G23000	4	1:8143520-8143611	+	RI	0.61889	0.90079	-0.28189	0.996	K1	0.9981	Heavy metal transport/detoxification superfamily protein	Heavy metal transport/detoxification superfamily protein ; FUNCTIONS IN: metal ion binding; INVOLVED IN: metal ion transport; LOCATED IN: cellular_component unknown; EXPRESSED IN: 12 plant structures; EXPRESSED DURING: 6 growth stages; CONTAINS InterPro DOMAIN/s: Heavy metal transport/detoxification protein (InterPro:IPR006121); BEST Arabidopsis thaliana protein match is: Heavy metal transport/de…	Heavy metal-associated domain, HMA	NO
AT1G23560	10	1:8353469-8353551	-	RI	0.20955	0.55989	-0.35034	0.981	K1	0.9975	Domain of unknown function (DUF220)	Domain of unknown function (DUF220); CONTAINS InterPro DOMAIN/s: Protein of unknown function DUF220 (InterPro:IPR003863); BEST Arabidopsis thaliana protein match is: Domain of unknown function (DUF220) (TAIR:AT1G70480.2)	Protein of unknown function DUF220	NO
AT1G23720	17	1:8390469-8390543	+	EI/RI	0.83288	0.93727	-0.10438	0.901	K5	2.3424	Proline-rich extensin-like family protein	Proline-rich extensin-like family protein; FUNCTIONS IN: structural constituent of cell wall; INVOLVED IN: plant-type cell wall organization; EXPRESSED IN: hypocotyl, root, carpel; EXPRESSED DURING: petal differentiation and expansion stage; CONTAINS InterPro DOMAIN/s: Extensin-like repeat (InterPro:IPR006706); BEST Arabidopsis thaliana protein match is: Proline-rich extensin-like family protein …	Extensin domain	NO
AT1G23720	17	1:8390469-8390543	+	RI	0.83288	0.93727	-0.10438	0.901	K5	2.3424	Proline-rich extensin-like family protein	Proline-rich extensin-like family protein; FUNCTIONS IN: structural constituent of cell wall; INVOLVED IN: plant-type cell wall organization; EXPRESSED IN: hypocotyl, root, carpel; EXPRESSED DURING: petal differentiation and expansion stage; CONTAINS InterPro DOMAIN/s: Extensin-like repeat (InterPro:IPR006706); BEST Arabidopsis thaliana protein match is: Proline-rich extensin-like family protein …	Extensin domain	NO
AT1G23730	3	1:8395644-8395962	+	RI	0.79017	0.10323	0.68693	1	K1	0.8176	beta carbonic anhydrase 3	beta carbonic anhydrase 3 (BCA3); FUNCTIONS IN: carbonate dehydratase activity, zinc ion binding; INVOLVED IN: carbon utilization; LOCATED IN: cytosol, plasma membrane, membrane; EXPRESSED IN: 14 plant structures; EXPRESSED DURING: 6 growth stages; CONTAINS InterPro DOMAIN/s: Carbonic anhydrase, prokaryotic-like, conserved site (InterPro:IPR015892), Carbonic anhydrase (InterPro:IPR001765); BEST A…	Carbonic anhydrase | Carbonic anhydrase, prokaryotic-like, conserved site	NO
AT1G24148	4	1:8544630-8545011	+	RI	0.27513	0.069461	0.20567	1	K2	0.9523		unknown protein; FUNCTIONS IN: molecular_function unknown; INVOLVED IN: biological_process unknown; LOCATED IN: cellular_component unknown; BEST Arabidopsis thaliana protein match is: unknown protein (TAIR:AT1G24147.1)		NO
AT1G24260	11	1:8594201-8594242	-	CE	0.76571	0.92419	-0.15848	0.928	K1	0.8367	K-box region and MADS-box transcription factor family protein	SEPALLATA3 (SEP3); CONTAINS InterPro DOMAIN/s: Transcription factor, MADS-box (InterPro:IPR002100), Transcription factor, K-box (InterPro:IPR002487); FUNCTIONS IN: protein binding, DNA binding, sequence-specific DNA binding transcription factor activity; BEST Arabidopsis thaliana protein match is: K-box region and MADS-box transcription factor family protein (TAIR:AT3G02310.1); INVOLVED IN: in 6 …	Transcription factor, K-box | Transcription factor, MADS-box	NO
AT1G24350	13	1:8639369-8639412	-	CE	0.19724	0.30528	-0.10805	0.968	K3	1.4638	Acid phosphatase/vanadium-dependent haloperoxidase-related protein	Acid phosphatase/vanadium-dependent haloperoxidase-related protein; INVOLVED IN: biological_process unknown; EXPRESSED IN: 24 plant structures; EXPRESSED DURING: 15 growth stages; CONTAINS InterPro DOMAIN/s: Acid phosphatase/vanadium-dependent haloperoxidase related (InterPro:IPR003832); BEST Arabidopsis thaliana protein match is: Acid phosphatase/vanadium-dependent haloperoxidase-related protein…	Acid phosphatase/vanadium-dependent haloperoxidase-related	NO
AT1G24625	5	1:8726662-8726777	-	RI	0.78259	0.31957	0.46301	0.997	K2	1.1231	zinc finger protein 7	zinc finger protein 7 (ZFP7); FUNCTIONS IN: sequence-specific DNA binding transcription factor activity, zinc ion binding, nucleic acid binding; INVOLVED IN: regulation of transcription; LOCATED IN: intracellular; EXPRESSED IN: 18 plant structures; EXPRESSED DURING: 11 growth stages; CONTAINS InterPro DOMAIN/s: Zinc finger, C2H2-type (InterPro:IPR007087); BEST Arabidopsis thaliana protein match i…	Zinc finger, C2H2 | Zinc finger, C2H2-like	NO
AT1G24706	10	1:8742345-8742440	+	RI	0.029182	0.13054	-0.10136	0.956	K1	0.5747	THO2	THO2; FUNCTIONS IN: molecular_function unknown; INVOLVED IN: biological_process unknown; LOCATED IN: cellular_component unknown; EXPRESSED IN: 23 plant structures; EXPRESSED IN: 24 plant structures; EXPRESSED DURING: 13 growth stages; CONTAINS InterPro DOMAIN/s: THO complex, subunitTHOC2, C-region (InterPro:IPR021418), THO complex, subunitTHOC2, N-region (InterPro:IPR021726)	Signal transduction histidine kinase EnvZ-like, dimerisation/phosphoacceptor domain | THO complex, subunitTHOC2, C-terminal | THO complex, subunitTHOC2, N-terminal	NO
AT1G24706	8	1:8742064-8742150	+	RI	0.3984	0.80092	-0.40252	1	K2	1.1132	Encodes a component of the putative Arabidopsis THO/TREX complex: THO1 or HPR1 (At5g09860), THO2 (At1g24706), THO3 or TEX1 (At5g56130), THO5 (At5g42920, At1g45233), THO6 (At2g19430), and THO7 (At5g16790, At3g02950). THO/TREX complexes in animals have been implicated in the transport of mRNA precursors. Mutants of THO3/TEX1, THO1, THO6 accumulate reduced amount of small interfering (si)RNA, sugges…			NO
AT1G24825	4	1:8776340-8777013	+	RI	0.224	0.024389	0.19961	0.914	K3	1.5057				NO
AT1G24880	6	1:8776340-8777013	+	RI	0.31196	0.047156	0.2648	0.932	K2	1.3146	UDP-3-O-acyl N-acetylglycosamine deacetylase family protein	UDP-3-O-acyl N-acetylglycosamine deacetylase family protein; BEST Arabidopsis thaliana protein match is: UDP-3-O-acyl N-acetylglycosamine deacetylase family protein (TAIR:AT1G25054.1); FUNCTIONS IN: UDP-3-O-[3-hydroxymyristoyl] N-acetylglucosamine deacetylase activity; INVOLVED IN: lipid A biosynthetic process; CONTAINS InterPro DOMAIN/s: UDP-3-O-acyl N-acetylglucosamine deacetylase, N-terminal (…		NO
AT1G25277	4	1:8862257-8862519	+	RI	0.51316	0.22939	0.28377	0.913	K1	1	hypothetical protein;(source:Araport11)			NO
AT1G25420	7	1:8916191-8916347	+	RI	0.48222	0.28791	0.19431	0.901	K2	0.9973	Regulator of Vps4 activity in the MVB pathway protein	Regulator of Vps4 activity in the MVB pathway protein; INVOLVED IN: biological_process unknown; LOCATED IN: endomembrane system; EXPRESSED IN: 22 plant structures; EXPRESSED DURING: 13 growth stages; CONTAINS InterPro DOMAIN/s: Protein of unknown function DUF292, eukaryotic (InterPro:IPR005061); BEST Arabidopsis thaliana protein match is: Regulator of Vps4 activity in the MVB pathway protein (TAI…	Domain of unknown function DUF292, eukaryotic	NO
AT1G26230	26	1:9073121-9073196	-	RI	0.5701	0.40146	0.16864	0.937	K1	0.9924	TCP-1/cpn60 chaperonin family protein	TCP-1/cpn60 chaperonin family protein; FUNCTIONS IN: ATP binding; INVOLVED IN: protein refolding, cellular protein metabolic process; EXPRESSED IN: 22 plant structures; LOCATED IN: chloroplast; EXPRESSED DURING: 13 growth stages; CONTAINS InterPro DOMAIN/s: Chaperonin Cpn60/TCP-1 (InterPro:IPR002423), Chaperonin Cpn60 (InterPro:IPR001844); BEST Arabidopsis thaliana protein match is: chaperonin 60…	Chaperonin Cpn60 | Chaperonin Cpn60/TCP-1 | GroEL-like apical domain | GroEL-like equatorial domain	NO
AT1G26260	5	1:9087047-9087152	+	RI	0.95564	0.43542	0.52022	0.994	K2	1.6981	cryptochrome-interacting basic-helix-loop-helix 5	cryptochrome-interacting basic-helix-loop-helix 5 (CIB5); FUNCTIONS IN: DNA binding, sequence-specific DNA binding transcription factor activity; INVOLVED IN: positive regulation of flower development, regulation of transcription; LOCATED IN: nucleus; EXPRESSED IN: 20 plant structures; EXPRESSED DURING: 13 growth stages; CONTAINS InterPro DOMAIN/s: Helix-loop-helix DNA-binding domain (InterPro:IP…	Myc-type, basic helix-loop-helix (bHLH) domain	NO
AT1G26260	8	1:9087392-9087451	+	RI	0.76627	0.93507	-0.1688	0.985	K2	1.1831	cryptochrome-interacting basic-helix-loop-helix 5	cryptochrome-interacting basic-helix-loop-helix 5 (CIB5); FUNCTIONS IN: DNA binding, sequence-specific DNA binding transcription factor activity; INVOLVED IN: positive regulation of flower development, regulation of transcription; LOCATED IN: nucleus; EXPRESSED IN: 20 plant structures; EXPRESSED DURING: 13 growth stages; CONTAINS InterPro DOMAIN/s: Helix-loop-helix DNA-binding domain (InterPro:IP…	Myc-type, basic helix-loop-helix (bHLH) domain	NO
AT1G26440	11	1:9145735-9145984	-	RI	0.49943	0.30268	0.19675	0.986	K5	3.2225	ureide permease 5	ureide permease 5 (UPS5); FUNCTIONS IN: xanthine transmembrane transporter activity, uracil transmembrane transporter activity, allantoin uptake transmembrane transporter activity; LOCATED IN: endomembrane system; EXPRESSED IN: 31 plant structures; INVOLVED IN: xanthine transport, uracil transport, allantoin transport; EXPRESSED DURING: 13 growth stages; BEST Arabidopsis thaliana protein match is…	Ureide permease	NO
AT1G26830	4	1:9295932-9296052	+	RI	0.12216	0.019428	0.10273	0.995	K1	0.5918	cullin 3	cullin 3 (CUL3); CONTAINS InterPro DOMAIN/s: Winged helix-turn-helix transcription repressor DNA-binding (InterPro:IPR011991), Cullin homology (InterPro:IPR016158), Cullin protein, neddylation domain (InterPro:IPR019559), Cullin, N-terminal (InterPro:IPR001373), Cullin repeat-like-containing domain (InterPro:IPR016159); BEST Arabidopsis thaliana protein match is: cullin 3B (TAIR:AT1G69670.1)	Cullin homology | Cullin protein, neddylation domain | Cullin repeat-like-containing domain | Cullin, N-terminal | Winged helix-turn-helix DNA-binding domain	NO
AT1G27210	5	1:9456975-9457056	-	RI	0.13788	0.031504	0.10638	0.983	K1	0.7137	ARM repeat superfamily protein	ARM repeat superfamily protein; FUNCTIONS IN: binding; LOCATED IN: chloroplast; EXPRESSED IN: 23 plant structures; EXPRESSED DURING: 13 growth stages; CONTAINS InterPro DOMAIN/s: HEAT (InterPro:IPR000357), Armadillo-like helical (InterPro:IPR011989), HEAT, type 2 (InterPro:IPR021133), Armadillo-type fold (InterPro:IPR016024); BEST Arabidopsis thaliana protein match is: ARM repeat superfamily prot…	Armadillo-like helical | Armadillo-type fold | HEAT, type 2	NO
AT1G27290	3	1:9482200-9482559	+	RI	0.341	0.20144	0.13956	0.961	K1	0.931		unknown protein; FUNCTIONS IN: molecular_function unknown; INVOLVED IN: biological_process unknown; EXPRESSED IN: 25 plant structures; EXPRESSED DURING: 15 growth stages		NO
AT1G27320	29	1:9492102-9492195	+	RI	0.73765	0.93134	-0.19368	0.944	K1	0.7794	histidine kinase 3	histidine kinase 3 (HK3); CONTAINS InterPro DOMAIN/s: Signal transduction histidine kinase, homodimeric (InterPro:IPR009082), CHASE (InterPro:IPR006189), Signal transduction histidine kinase, core (InterPro:IPR005467), ATPase-like, ATP-binding domain (InterPro:IPR003594), CheY-like (InterPro:IPR011006), Signal transduction response regulator, receiver domain (InterPro:IPR001789), Signal transduct…	CHASE | CheY-like superfamily | Histidine kinase-like ATPase, C-terminal domain | Signal transduction histidine kinase EnvZ-like, dimerisation/phosphoacceptor domain | Signal transduction histidine kinase, core | Signal transduction histidine kinase, homodimeric domain | Signal transduction histidine kinase-related protein, C-terminal | Signal transduction response regulator, receiver domain	NO
AT1G27520	20	1:9560598-9560620	+	AD	0.41047	0.56959	-0.15912	0.986	K1	0.9962	Glycosyl hydrolase family 47 protein	Glycosyl hydrolase family 47 protein; FUNCTIONS IN: mannosyl-oligosaccharide 1,2-alpha-mannosidase activity, alpha-mannosidase activity, calcium ion binding; INVOLVED IN: protein amino acid N-linked glycosylation; LOCATED IN: endomembrane system, membrane; EXPRESSED IN: 22 plant structures; EXPRESSED DURING: 13 growth stages; CONTAINS InterPro DOMAIN/s: Glycoside hydrolase, family 47 (InterPro:IP…	Glycoside hydrolase, family 47	NO
AT1G27520	24	1:9560334-9560476	+	RI	0.5875	0.82927	-0.24177	1	K2	1.4327	Glycosyl hydrolase family 47 protein	Glycosyl hydrolase family 47 protein; FUNCTIONS IN: mannosyl-oligosaccharide 1,2-alpha-mannosidase activity, alpha-mannosidase activity, calcium ion binding; INVOLVED IN: protein amino acid N-linked glycosylation; LOCATED IN: endomembrane system, membrane; EXPRESSED IN: 22 plant structures; EXPRESSED DURING: 13 growth stages; CONTAINS InterPro DOMAIN/s: Glycoside hydrolase, family 47 (InterPro:IP…	Glycoside hydrolase, family 47	NO
AT1G27590	13	1:9593852-9594283	+	RI	0.7024	0.8509	-0.1485	0.94	K2	1.3729		CONTAINS InterPro DOMAIN/s: Protein of unknown function DUF3453 (InterPro:IPR021850); BEST Arabidopsis thaliana protein match is: phosphatidylinositol 3- and 4-kinase family protein (TAIR:AT1G27570.1)		NO
AT1G27910	4	1:9724038-9724430	-	RI	0.21221	0.055288	0.15692	0.99	K1	0.7616	plant U-box 45	plant U-box 45 (PUB45); FUNCTIONS IN: ubiquitin-protein ligase activity; INVOLVED IN: protein ubiquitination; LOCATED IN: ubiquitin ligase complex; EXPRESSED IN: 18 plant structures; EXPRESSED DURING: 11 growth stages; CONTAINS InterPro DOMAIN/s: U box domain (InterPro:IPR003613), Armadillo-like helical (InterPro:IPR011989), Armadillo (InterPro:IPR000225), Armadillo-type fold (InterPro:IPR016024)…	Armadillo | Armadillo-like helical | Armadillo-type fold | U box domain | Zinc finger, RING/FYVE/PHD-type	NO
AT1G28520	11	1:10029944-10030026	+	RI	0.03227	0.17993	-0.14766	0.997	K2	1.3057	vascular plant one zinc finger protein	vascular plant one zinc finger protein (VOZ1); FUNCTIONS IN: transcription activator activity; INVOLVED IN: biological_process unknown; LOCATED IN: cellular_component unknown; EXPRESSED IN: 22 plant structures; EXPRESSED DURING: 8 growth stages; BEST Arabidopsis thaliana protein match is: vascular plant one zinc finger protein 2 (TAIR:AT2G42400.1)		NO
AT1G28520	9	1:10029436-10029673	+	RI	0.96744	0.20491	0.76253	1	K2	0.9768	vascular plant one zinc finger protein	vascular plant one zinc finger protein (VOZ1); FUNCTIONS IN: transcription activator activity; INVOLVED IN: biological_process unknown; LOCATED IN: cellular_component unknown; EXPRESSED IN: 22 plant structures; EXPRESSED DURING: 8 growth stages; BEST Arabidopsis thaliana protein match is: vascular plant one zinc finger protein 2 (TAIR:AT2G42400.1)		NO
AT1G28600	4	1:10052467-10052820	-	RI	0.24334	0.064291	0.17905	1	K1	0.8113	GDSL-like Lipase/Acylhydrolase superfamily protein	GDSL-like Lipase/Acylhydrolase superfamily protein; FUNCTIONS IN: hydrolase activity, acting on ester bonds, carboxylesterase activity; INVOLVED IN: lipid metabolic process; LOCATED IN: cell wall; EXPRESSED IN: 18 plant structures; EXPRESSED DURING: 9 growth stages; CONTAINS InterPro DOMAIN/s: Lipase, GDSL (InterPro:IPR001087); BEST Arabidopsis thaliana protein match is: GDSL-like Lipase/Acylhydr…	Lipase, GDSL | SGNH hydrolase-type esterase domain	NO
AT1G28960	13	1:10109786-10109811	-	AA	0.64917	0.50389	0.14528	0.986	K2	1.5629	nudix hydrolase homolog 15	nudix hydrolase homolog 15 (NUDX15); CONTAINS InterPro DOMAIN/s: NUDIX hydrolase domain-like (InterPro:IPR015797), NUDIX hydrolase domain (InterPro:IPR000086), NUDIX hydrolase, AtNUDT22 (InterPro:IPR017397); CONTAINS InterPro DOMAIN/s: NUDIX hydrolase domain-like (InterPro:IPR015797), NUDIX hydrolase, AtNUDT22 (InterPro:IPR017397), NUDIX hydrolase domain (InterPro:IPR000086); BEST Arabidopsis tha…	NUDIX hydrolase domain | NUDIX hydrolase domain-like | NUDIX hydrolase, AtNUDT22	NO
AT1G29030	11	1:10131070-10131135	-	CE	0.92832	0.8142	0.11412	0.92	K1	0.7794	Apoptosis inhibitory protein 5 (API5)	Apoptosis inhibitory protein 5 (API5); FUNCTIONS IN: binding; INVOLVED IN: biological_process unknown; LOCATED IN: cellular_component unknown; CONTAINS InterPro DOMAIN/s: Apoptosis inhibitory 5 (InterPro:IPR008383), Armadillo-type fold (InterPro:IPR016024); BEST Arabidopsis thaliana protein match is: Apoptosis inhibitory protein 5 (API5) (TAIR:AT2G34040.1)	Apoptosis inhibitory 5 | Armadillo-like helical | Armadillo-type fold	NO
AT1G29410	12	1:10298702-10298837	-	RI	0.37088	0.56849	-0.19761	0.925	K2	1.2578	phosphoribosylanthranilate isomerase 3	phosphoribosylanthranilate isomerase 3 (PAI3); CONTAINS InterPro DOMAIN/s: N-(5&apos;phosphoribosyl)anthranilate isomerase (PRAI) (InterPro:IPR001240), Aldolase-type TIM barrel (InterPro:IPR013785), Ribulose-phosphate binding barrel (InterPro:IPR011060); BEST Arabidopsis thaliana protein match is: phosphoribosylanthranilate isomerase 1 (TAIR:AT1G07780.4)	Aldolase-type TIM barrel | N-(5'phosphoribosyl) anthranilate isomerase (PRAI) like domain | Ribulose-phosphate binding barrel	NO
AT1G29465	4	1:10308816-10309574	+	RI	0.934	0.78617	0.14782	0.977	K1	0.8219		unknown protein; FUNCTIONS IN: molecular_function unknown; INVOLVED IN: biological_process unknown; LOCATED IN: endomembrane system		NO
AT1G29890	5	1:10463580-10464110	+	RI	0.13523	0.027075	0.10815	0.968	K1	0.655	O-acetyltransferase family protein	O-acetyltransferase family protein; FUNCTIONS IN: molecular_function unknown; INVOLVED IN: biological_process unknown; CONTAINS InterPro DOMAIN/s: Cas1p-like (InterPro:IPR012419); LOCATED IN: endomembrane system; BEST Arabidopsis thaliana protein match is: O-acetyltransferase family protein (TAIR:AT2G34410.2)	Cas1p 10 TM acyl transferase domain	NO
AT1G29950	4	1:10492355-10492435	+	RI	0.19086	0.041915	0.14894	0.999	K2	0.7697	basic helix-loop-helix (bHLH) DNA-binding superfamily protein	basic helix-loop-helix (bHLH) DNA-binding superfamily protein; FUNCTIONS IN: transcription regulator activity, sequence-specific DNA binding transcription factor activity; INVOLVED IN: regulation of transcription; LOCATED IN: nucleus; CONTAINS InterPro DOMAIN/s: Helix-loop-helix DNA-binding domain (InterPro:IPR001092), Helix-loop-helix DNA-binding (InterPro:IPR011598); BEST Arabidopsis thaliana p…	Myc-type, basic helix-loop-helix (bHLH) domain	NO
AT1G30410	7	1:10739013-10739325	+	RI	0.41644	0.1491	0.26734	0.969	K1	0.994	multidrug resistance-associated protein 13	multidrug resistance-associated protein 13 (MRP13); FUNCTIONS IN: ATPase activity, coupled to transmembrane movement of substances; INVOLVED IN: transport, transmembrane transport; LOCATED IN: integral to membrane; CONTAINS InterPro DOMAIN/s: ATPase, AAA+ type, core (InterPro:IPR003593), ABC transporter-like (InterPro:IPR003439), ABC transporter, transmembrane domain, type 1 (InterPro:IPR011527),…		NO
AT1G30420	55	1:10754685-10754777	+	RI	0.42605	0.80817	-0.38212	0.998	K1	0.9957	multidrug resistance-associated protein 12	multidrug resistance-associated protein 12 (MRP12); FUNCTIONS IN: ATPase activity, coupled to transmembrane movement of substances; INVOLVED IN: transport, transmembrane transport; LOCATED IN: integral to membrane; CONTAINS InterPro DOMAIN/s: ATPase, AAA+ type, core (InterPro:IPR003593), ABC transporter-like (InterPro:IPR003439), ABC transporter, transmembrane domain, type 1 (InterPro:IPR011527),…	AAA+ ATPase domain | ABC transporter type 1, transmembrane domain | ABC transporter, conserved site | ABC transporter, transmembrane domain | ABC transporter-like | P-loop containing nucleoside triphosphate hydrolase	NO
AT1G30475	6	1:10789752-10789858	-	RI	0.59533	0.0678	0.52753	1	K2	1.2293		FUNCTIONS IN: molecular_function unknown; INVOLVED IN: biological_process unknown; BEST Arabidopsis thaliana protein match is: embryo defective 1303 (TAIR:AT1G56200.1)		NO
AT1G30520	17	1:10812007-10812013	+	AA	0.50007	0.61053	-0.11046	0.901	K2	1.7114	acyl-activating enzyme 14	acyl-activating enzyme 14 (AAE14); CONTAINS InterPro DOMAIN/s: AMP-binding, conserved site (InterPro:IPR020845), AMP-dependent synthetase/ligase (InterPro:IPR000873); BEST Arabidopsis thaliana protein match is: AMP-dependent synthetase and ligase family protein (TAIR:AT4G19010.1)	AMP-binding enzyme C-terminal domain | AMP-binding, conserved site | AMP-dependent synthetase/ligase	NO
AT1G30590	9	1:10839594-10839596	-	AA	0.42479	0.59312	-0.16833	0.99	K2	1.0901	RNA polymerase I specific transcription initiation factor RRN3 protein	RNA polymerase I specific transcription initiation factor RRN3 protein; CONTAINS InterPro DOMAIN/s: RNA polymerase I specific transcription initiation factor RRN3 (InterPro:IPR007991); BEST Arabidopsis thaliana protein match is: RNA polymerase I specific transcription initiation factor RRN3 protein (TAIR:AT2G34750.1)	RNA polymerase I specific transcription initiation factor RRN3	NO
AT1G30620	13	1:10855338-10855429	+	RI	0.26795	0.040905	0.22705	1	K3	1.3736	NAD(P)-binding Rossmann-fold superfamily protein	MURUS 4 (MUR4); FUNCTIONS IN: UDP-arabinose 4-epimerase activity, catalytic activity; INVOLVED IN: plant-type cell wall biogenesis, arabinose biosynthetic process, nucleotide-sugar metabolic process; LOCATED IN: Golgi apparatus; EXPRESSED IN: 24 plant structures; EXPRESSED DURING: 15 growth stages; CONTAINS InterPro DOMAIN/s: NAD-dependent epimerase/dehydratase (InterPro:IPR001509), NAD(P)-bindin…	NAD(P)-binding domain | NAD-dependent epimerase/dehydratase, N-terminal domain | UDP-glucose 4-epimerase C-terminal domain | UDP-glucose 4-epimerase GalE	NO
AT1G30620	7	1:10854990-10855050	+	CE	0.33716	0.1862	0.15096	0.901	K3	1.305	NAD(P)-binding Rossmann-fold superfamily protein	MURUS 4 (MUR4); FUNCTIONS IN: UDP-arabinose 4-epimerase activity, catalytic activity; INVOLVED IN: plant-type cell wall biogenesis, arabinose biosynthetic process, nucleotide-sugar metabolic process; LOCATED IN: Golgi apparatus; EXPRESSED IN: 24 plant structures; EXPRESSED DURING: 15 growth stages; CONTAINS InterPro DOMAIN/s: NAD-dependent epimerase/dehydratase (InterPro:IPR001509), NAD(P)-bindin…	NAD(P)-binding domain | NAD-dependent epimerase/dehydratase, N-terminal domain | UDP-glucose 4-epimerase C-terminal domain | UDP-glucose 4-epimerase GalE	NO
AT1G30970	18	1:11040685-11041203	-	RI	0.4939	0.66018	-0.16629	0.949	K1	1	zinc finger (C2H2 type) family protein	suppressor of FRIGIDA4 (SUF4); CONTAINS InterPro DOMAIN/s: Zinc finger, C2H2-like (InterPro:IPR015880), Zinc finger, BED-type predicted (InterPro:IPR003656), Zinc finger, C2H2-type (InterPro:IPR007087); FUNCTIONS IN: DNA binding, protein homodimerization activity, protein heterodimerization activity, sequence-specific DNA binding transcription factor activity; INVOLVED IN: histone H3-K4 methylati…	Zinc finger, BED-type | Zinc finger, C2H2 | Zinc finger, C2H2-like	NO
AT1G31170	8	1:11134213-11134341	+	AA	0.69946	0.85065	-0.15119	0.971	K2	0.913	sulfiredoxin	sulfiredoxin (SRX); CONTAINS InterPro DOMAIN/s: ParB-like nuclease (InterPro:IPR003115); CONTAINS InterPro DOMAIN/s: Sulfiredoxin (InterPro:IPR016692), ParB-like nuclease (InterPro:IPR003115)	ParB/Sulfiredoxin | Sulfiredoxin	NO
AT1G31300	5	1:11193839-11193961	+	RI	0.58335	0.2554	0.32795	1	K3	1.3338	TRAM, LAG1 and CLN8 (TLC) lipid-sensing domain containing protein	TRAM, LAG1 and CLN8 (TLC) lipid-sensing domain containing protein; FUNCTIONS IN: molecular_function unknown; INVOLVED IN: biological_process unknown; LOCATED IN: integral to membrane; EXPRESSED IN: 24 plant structures; EXPRESSED DURING: 13 growth stages; CONTAINS InterPro DOMAIN/s: TRAM/LAG1/CLN8 homology domain (InterPro:IPR006634); BEST Arabidopsis thaliana protein match is: TRAM, LAG1 and CLN8…	TRAM/LAG1/CLN8 homology domain	NO
AT1G31300	6	1:11193962-11193980	+	CE	0.57248	0.25156	0.32092	1	K2	1.0798	TRAM, LAG1 and CLN8 (TLC) lipid-sensing domain containing protein	TRAM, LAG1 and CLN8 (TLC) lipid-sensing domain containing protein; FUNCTIONS IN: molecular_function unknown; INVOLVED IN: biological_process unknown; LOCATED IN: integral to membrane; EXPRESSED IN: 24 plant structures; EXPRESSED DURING: 13 growth stages; CONTAINS InterPro DOMAIN/s: TRAM/LAG1/CLN8 homology domain (InterPro:IPR006634); BEST Arabidopsis thaliana protein match is: TRAM, LAG1 and CLN8…	TRAM/LAG1/CLN8 homology domain	NO
AT1G31420	3	1:11249835-11250249	+	RI	0.1955	0.042001	0.1535	1	K1	0.7587	Leucine-rich repeat protein kinase family protein	FEI 1 (FEI1); FUNCTIONS IN: protein serine/threonine kinase activity, kinase activity, ATP binding; INVOLVED IN: protein amino acid phosphorylation, transmembrane receptor protein tyrosine kinase signaling pathway, plant-type cell wall organization, unidimensional cell growth; LOCATED IN: endomembrane system; EXPRESSED IN: 23 plant structures; EXPRESSED DURING: 13 growth stages; CONTAINS InterPro…	Leucine-rich repeat | Leucine-rich repeat-containing N-terminal, type 2 | Protein kinase domain | Protein kinase, ATP binding site | Protein kinase-like domain | Serine/threonine-protein kinase, active site	NO
AT1G31480	3	1:11266042-11266224	+	RI	0.58149	0.069108	0.51239	1	K1	0.9979	shoot gravitropism 2 (SGR2)	SHOOT GRAVITROPISM 2 (SGR2); FUNCTIONS IN: phospholipase A1 activity; INVOLVED IN: gravitropism, negative gravitropism, detection of gravity, amyloplast organization; LOCATED IN: plant-type vacuole membrane, vacuole; EXPRESSED IN: 25 plant structures; EXPRESSED DURING: 13 growth stages; CONTAINS InterPro DOMAIN/s: DDHD (InterPro:IPR004177)	Alpha/Beta hydrolase fold | DDHD	NO
AT1G31500	12	1:11275958-11276059	-	EI/RI	0.24184	0.10439	0.13745	0.979	K1	0.8042	DNAse I-like superfamily protein	DNAse I-like superfamily protein; FUNCTIONS IN: hydrolase activity; INVOLVED IN: biological_process unknown; LOCATED IN: cellular_component unknown; EXPRESSED IN: 22 plant structures; EXPRESSED DURING: 13 growth stages; CONTAINS InterPro DOMAIN/s: Endonuclease/exonuclease/phosphatase (InterPro:IPR005135); BEST Arabidopsis thaliana protein match is: DNAse I-like superfamily protein (TAIR:AT1G31530…	Endonuclease/exonuclease/phosphatase	NO
AT1G31500	12	1:11275958-11276059	-	RI	0.24184	0.10439	0.13745	0.979	K1	0.8042	DNAse I-like superfamily protein	DNAse I-like superfamily protein; FUNCTIONS IN: hydrolase activity; INVOLVED IN: biological_process unknown; LOCATED IN: cellular_component unknown; EXPRESSED IN: 22 plant structures; EXPRESSED DURING: 13 growth stages; CONTAINS InterPro DOMAIN/s: Endonuclease/exonuclease/phosphatase (InterPro:IPR005135); BEST Arabidopsis thaliana protein match is: DNAse I-like superfamily protein (TAIR:AT1G31530…	Endonuclease/exonuclease/phosphatase	NO
AT1G31500	27	1:11274127-11274235	-	RI	0.16499	0.28281	-0.11782	0.959	K1	0.8871	DNAse I-like superfamily protein	DNAse I-like superfamily protein; FUNCTIONS IN: hydrolase activity; INVOLVED IN: biological_process unknown; LOCATED IN: cellular_component unknown; EXPRESSED IN: 22 plant structures; EXPRESSED DURING: 13 growth stages; CONTAINS InterPro DOMAIN/s: Endonuclease/exonuclease/phosphatase (InterPro:IPR005135); BEST Arabidopsis thaliana protein match is: DNAse I-like superfamily protein (TAIR:AT1G31530…	Endonuclease/exonuclease/phosphatase	NO
AT1G31850	6	1:11431009-11431135	+	RI	0.26971	0.067979	0.20173	0.995	K2	1.0804	S-adenosyl-L-methionine-dependent methyltransferases superfamily protein	S-adenosyl-L-methionine-dependent methyltransferases superfamily protein; CONTAINS InterPro DOMAIN/s: Protein of unknown function DUF248, methyltransferase putative (InterPro:IPR004159); BEST Arabidopsis thaliana protein match is: S-adenosyl-L-methionine-dependent methyltransferases superfamily protein (TAIR:AT4G19120.2)	Putative S-adenosyl-L-methionine-dependent methyltransferase | S-adenosyl-L-methionine-dependent methyltransferase-like	NO
AT1G31870	3	1:11437252-11437268	+	AA	0.55181	0.73947	-0.18766	0.922	K1	0.9877		unknown protein; FUNCTIONS IN: molecular_function unknown; INVOLVED IN: biological_process unknown; LOCATED IN: cytosol, nucleus; EXPRESSED IN: 25 plant structures; EXPRESSED DURING: 15 growth stages; CONTAINS InterPro DOMAIN/s: Protein of unknown function DUF2050, pre-mRNA-splicing factor (InterPro:IPR018609)	Bud13	NO
AT1G31930	8	1:11465661-11465726	+	RI	0.68126	0.24723	0.43403	0.997	K3	1.1127	extra-large GTP-binding protein 3	extra-large GTP-binding protein 3 (XLG3); FUNCTIONS IN: guanyl nucleotide binding, signal transducer activity; FUNCTIONS IN: signal transducer activity, guanyl nucleotide binding; INVOLVED IN: in 11 processes; LOCATED IN: nucleus; EXPRESSED IN: 26 plant structures; EXPRESSED DURING: 13 growth stages; CONTAINS InterPro DOMAIN/s: Guanine nucleotide binding protein (G-protein), alpha subunit (InterP…	G protein alpha subunit, helical insertion | Guanine nucleotide binding protein (G-protein), alpha subunit | P-loop containing nucleoside triphosphate hydrolase	NO
AT1G31935	4	1:11469514-11469598	+	RI	0.68973	0.84132	-0.15158	0.944	K2	1.1779	other RNA			NO
AT1G31950	13	1:11477446-11477556	+	RI	0.19569	0.46011	-0.26442	0.984	K1	0.9995	Terpenoid cyclases/Protein prenyltransferases superfamily protein	Terpenoid cyclases/Protein prenyltransferases superfamily protein; FUNCTIONS IN: lyase activity, magnesium ion binding; INVOLVED IN: metabolic process; LOCATED IN: membrane; EXPRESSED IN: 7 plant structures; EXPRESSED DURING: LP.04 four leaves visible, LP.02 two leaves visible, petal differentiation and expansion stage; CONTAINS InterPro DOMAIN/s: Terpene synthase, metal-binding domain (InterPro:…		NO
AT1G32150	4	1:11565673-11565943	+	RI	0.23469	0.057249	0.17744	0.954	K2	1.5229	basic region/leucine zipper transcription factor 68	basic region/leucine zipper transcription factor 68 (bZIP68); FUNCTIONS IN: sequence-specific DNA binding, sequence-specific DNA binding transcription factor activity; INVOLVED IN: transcription, DNA-dependent, regulation of transcription, DNA-dependent, regulation of transcription; LOCATED IN: nucleus; EXPRESSED IN: 24 plant structures; EXPRESSED DURING: 14 growth stages; CONTAINS InterPro DOMAI…	Basic-leucine zipper domain | G-box binding, MFMR	NO
AT1G32220	3	1:11607913-11608012	+	RI	0.83419	0.98829	-0.1541	1	K1	0.6962	NAD(P)-binding Rossmann-fold superfamily protein	NAD(P)-binding Rossmann-fold superfamily protein; FUNCTIONS IN: coenzyme binding, binding, catalytic activity; INVOLVED IN: response to oxidative stress; LOCATED IN: thylakoid, chloroplast, plastoglobule; EXPRESSED IN: 24 plant structures; EXPRESSED DURING: 15 growth stages; CONTAINS InterPro DOMAIN/s: NAD-dependent epimerase/dehydratase (InterPro:IPR001509), NAD(P)-binding domain (InterPro:IPR01…	NAD(P)-binding domain	NO
AT1G32330	4	1:11659548-11659946	-	RI	0.17606	0.045725	0.13034	0.942	K3	1.2868	heat shock transcription factor A1D	heat shock transcription factor A1D (HSFA1D); FUNCTIONS IN: protein binding, DNA binding, sequence-specific DNA binding transcription factor activity; INVOLVED IN: response to heat; LOCATED IN: nucleus; EXPRESSED IN: 24 plant structures; EXPRESSED DURING: 15 growth stages; CONTAINS InterPro DOMAIN/s: Winged helix-turn-helix transcription repressor DNA-binding (InterPro:IPR011991), Heat shock fact…	Heat shock factor (HSF)-type, DNA-binding | Heat shock transcription factor family | Heat shock transcription factor, plant | Winged helix-turn-helix DNA-binding domain	NO
AT1G32330	6	1:11658527-11659469	-	RI	0.21834	0.076167	0.14217	0.974	K3	1.2868	heat shock transcription factor A1D	heat shock transcription factor A1D (HSFA1D); FUNCTIONS IN: protein binding, DNA binding, sequence-specific DNA binding transcription factor activity; INVOLVED IN: response to heat; LOCATED IN: nucleus; EXPRESSED IN: 24 plant structures; EXPRESSED DURING: 15 growth stages; CONTAINS InterPro DOMAIN/s: Winged helix-turn-helix transcription repressor DNA-binding (InterPro:IPR011991), Heat shock fact…	Heat shock factor (HSF)-type, DNA-binding | Heat shock transcription factor family | Heat shock transcription factor, plant | Winged helix-turn-helix DNA-binding domain	NO
AT1G32490	6	1:11749292-11749405	-	RI	0.34323	0.046482	0.29675	1	K2	1.1066	RNA helicase family protein	ENHANCED SILENCING PHENOTYPE 3 (ESP3); FUNCTIONS IN: helicase activity, ATP-dependent RNA helicase activity, ATP binding, ATP-dependent helicase activity, nucleic acid binding; INVOLVED IN: RNA splicing, posttranscriptional gene silencing by RNA, embryo development ending in seed dormancy; LOCATED IN: endomembrane system; EXPRESSED IN: 23 plant structures; EXPRESSED IN: 24 plant structures; EXPRE…	DEAD/DEAH box helicase domain | DNA/RNA helicase, ATP-dependent, DEAH-box type, conserved site | Domain of unknown function DUF1605 | Helicase, C-terminal | Helicase, superfamily 1/2, ATP-binding domain | Helicase-associated domain | P-loop containing nucleoside triphosphate hydrolase	NO
AT1G32540	6	1:11767706-11767869	+	RI	0.94025	0.75003	0.19022	0.996	K2	1.1386	lsd one like 1	lsd one like 1 (LOL1); FUNCTIONS IN: DNA binding; INVOLVED IN: induction of apoptosis; EXPRESSED IN: 21 plant structures; LOCATED IN: endomembrane system; EXPRESSED DURING: 13 growth stages; CONTAINS InterPro DOMAIN/s: Zinc finger, LSD1-type (InterPro:IPR005735); BEST Arabidopsis thaliana protein match is: LSD1 zinc finger family protein (TAIR:AT4G20380.7)	Zinc finger, LSD1-type	NO
AT1G32583	2	1:11785917-11786222	+	RI	0.26014	0.13323	0.12691	0.919	K1	0.8598		FUNCTIONS IN: molecular_function unknown; INVOLVED IN: biological_process unknown; LOCATED IN: endomembrane system; BEST Arabidopsis thaliana protein match is: tapetum determinant 1 (TAIR:AT4G24972.1)		NO
AT1G32610	3	1:11796967-11797052	-	RI	0.88035	0.5341	0.34624	0.954	K1	0.971	hydroxyproline-rich glycoprotein family protein	hydroxyproline-rich glycoprotein family protein; BEST Arabidopsis thaliana protein match is: VQ motif-containing protein (TAIR:AT2G35230.1)		NO
AT1G32930	3	1:11933833-11934292	-	RI	0.30174	0.046536	0.2552	1	K1	0.9276	Galactosyltransferase family protein	Galactosyltransferase family protein; FUNCTIONS IN: transferase activity, transferring hexosyl groups, transferase activity, transferring glycosyl groups; INVOLVED IN: protein amino acid glycosylation; LOCATED IN: membrane; EXPRESSED IN: 16 plant structures; EXPRESSED DURING: 6 growth stages; CONTAINS InterPro DOMAIN/s: Glycosyl transferase, family 31 (InterPro:IPR002659); BEST Arabidopsis thalia…	Domain of unknown function DUF4094 | Glycosyl transferase, family 31	NO
AT1G33420	6	1:12121687-12121862	-	RI	0.47052	0.85864	-0.38812	0.987	K1	0.9774	RING/FYVE/PHD zinc finger superfamily protein	RING/FYVE/PHD zinc finger superfamily protein; FUNCTIONS IN: DNA binding, zinc ion binding; INVOLVED IN: regulation of transcription, DNA-dependent; EXPRESSED IN: 22 plant structures; EXPRESSED DURING: 13 growth stages; CONTAINS InterPro DOMAIN/s: Zinc finger, PHD-type, conserved site (InterPro:IPR019786), Zinc finger, PHD-type (InterPro:IPR001965), Zinc finger, FYVE/PHD-type (InterPro:IPR011011)…	Zinc finger, FYVE/PHD-type | Zinc finger, PHD-finger | Zinc finger, PHD-type | Zinc finger, PHD-type, conserved site | Zinc finger, RING/FYVE/PHD-type	NO
AT1G33700	7	1:12213585-12213590	-	AA	0.98938	0.86244	0.12695	0.989	K2	1.3094	Beta-glucosidase, GBA2 type family protein	Beta-glucosidase, GBA2 type family protein; FUNCTIONS IN: catalytic activity, glucosylceramidase activity; FUNCTIONS IN: glucosylceramidase activity, catalytic activity; INVOLVED IN: glucosylceramide catabolic process, sphingolipid metabolic process; LOCATED IN: vacuole; EXPRESSED IN: 8 plant structures; EXPRESSED DURING: 4 anthesis, petal differentiation and expansion stage; CONTAINS InterPro DO…	Beta-glucosidase, GBA2 type | Beta-glucosidase, GBA2 type, N-terminal | Glucosylceramidase | Six-hairpin glycosidase | Six-hairpin glycosidase-like	NO
AT1G33790	22	1:12259495-12259579	+	RI	0.0544	0.24494	-0.19054	0.939	K4	2.3791	jacalin lectin family protein	jacalin lectin family protein; INVOLVED IN: biological_process unknown; EXPRESSED IN: 7 plant structures; LOCATED IN: chloroplast; EXPRESSED DURING: F mature embryo stage, petal differentiation and expansion stage, E expanded cotyledon stage, D bilateral stage; CONTAINS InterPro DOMAIN/s: Mannose-binding lectin (InterPro:IPR001229); BEST Arabidopsis thaliana protein match is: Mannose-binding lect…	Mannose-binding lectin	NO
AT1G33970	10	1:12351081-12351141	-	CE	0.66554	0.20728	0.45826	1	K3	1.7288	P-loop containing nucleoside triphosphate hydrolases superfamily protein	P-loop containing nucleoside triphosphate hydrolases superfamily protein; FUNCTIONS IN: GTP binding; INVOLVED IN: response to bacterium; LOCATED IN: cellular_component unknown; EXPRESSED IN: 22 plant structures; EXPRESSED DURING: 13 growth stages; CONTAINS InterPro DOMAIN/s: AIG1 (InterPro:IPR006703); BEST Arabidopsis thaliana protein match is: P-loop containing nucleoside triphosphate hydrolases…	AIG1 | P-loop containing nucleoside triphosphate hydrolase	NO
AT1G33970	11	1:12350971-12351080	-	RI	0.48771	0.15422	0.33349	1	K3	1.7288	P-loop containing nucleoside triphosphate hydrolases superfamily protein	P-loop containing nucleoside triphosphate hydrolases superfamily protein; FUNCTIONS IN: GTP binding; INVOLVED IN: response to bacterium; LOCATED IN: cellular_component unknown; EXPRESSED IN: 22 plant structures; EXPRESSED DURING: 13 growth stages; CONTAINS InterPro DOMAIN/s: AIG1 (InterPro:IPR006703); BEST Arabidopsis thaliana protein match is: P-loop containing nucleoside triphosphate hydrolases…	AIG1 | P-loop containing nucleoside triphosphate hydrolase	NO
AT1G33970	7	1:12351147-12351206	-	AD	0.67711	0.31719	0.35992	0.998	K3	1.7371	P-loop containing nucleoside triphosphate hydrolases superfamily protein	P-loop containing nucleoside triphosphate hydrolases superfamily protein; FUNCTIONS IN: GTP binding; INVOLVED IN: response to bacterium; LOCATED IN: cellular_component unknown; EXPRESSED IN: 22 plant structures; EXPRESSED DURING: 13 growth stages; CONTAINS InterPro DOMAIN/s: AIG1 (InterPro:IPR006703); BEST Arabidopsis thaliana protein match is: P-loop containing nucleoside triphosphate hydrolases…	AIG1 | P-loop containing nucleoside triphosphate hydrolase	NO
AT1G33970	8	1:12351142-12351146	-	AD	0.67691	0.30188	0.37503	1	K3	1.7371	P-loop containing nucleoside triphosphate hydrolases superfamily protein	P-loop containing nucleoside triphosphate hydrolases superfamily protein; FUNCTIONS IN: GTP binding; INVOLVED IN: response to bacterium; LOCATED IN: cellular_component unknown; EXPRESSED IN: 22 plant structures; EXPRESSED DURING: 13 growth stages; CONTAINS InterPro DOMAIN/s: AIG1 (InterPro:IPR006703); BEST Arabidopsis thaliana protein match is: P-loop containing nucleoside triphosphate hydrolases…	AIG1 | P-loop containing nucleoside triphosphate hydrolase	NO
AT1G34320	9	1:12520380-12520493	+	RI	0.24716	0.13413	0.11303	0.951	K1	0.8747	Protein of unknown function (DUF668)	Protein of unknown function (DUF668); INVOLVED IN: N-terminal protein myristoylation; LOCATED IN: plasma membrane; EXPRESSED IN: 22 plant structures; EXPRESSED DURING: 13 growth stages; CONTAINS InterPro DOMAIN/s: Protein of unknown function DUF668 (InterPro:IPR007700), Protein of unknown function DUF3475 (InterPro:IPR021864); BEST Arabidopsis thaliana protein match is: Protein of unknown functio…	Protein of unknown function DUF3475 | Protein of unknown function DUF668	NO
AT1G34418	3	1:12582385-12582468	+	RI	0.62831	0.20063	0.42768	1	K2	1.0665	other RNA			NO
AT1G34640	2	1:12687797-12688185	-	RI	0.27726	0.1481	0.12916	0.99	K1	0.8579	peptidases	peptidases; FUNCTIONS IN: peptidase activity; INVOLVED IN: N-terminal protein myristoylation, signal peptide processing; LOCATED IN: endomembrane system, integral to membrane, signal peptidase complex; EXPRESSED IN: 21 plant structures; EXPRESSED DURING: 13 growth stages; CONTAINS InterPro DOMAIN/s: Microsomal signal peptidase 12kDa subunit (InterPro:IPR009542)	Microsomal signal peptidase 12kDa subunit	NO
AT1G34844	6	1:12752281-12752366	+	RI	0.49252	0.26605	0.22648	0.938	K1	0.9984	other RNA			NO
AT1G35320	6	1:12961028-12961139	-	RI	0.25736	0.12899	0.12837	0.994	K2	1.5603		unknown protein; BEST Arabidopsis thaliana protein match is: unknown protein (TAIR:AT3G30160.1)		NO
AT1G35340	8	1:12978014-12978079	+	RI	0.24758	0.13945	0.10814	0.976	K2	0.991	ATP-dependent protease La (LON) domain protein	ATP-dependent protease La (LON) domain protein; FUNCTIONS IN: ATP-dependent peptidase activity; INVOLVED IN: proteolysis; EXPRESSED IN: 22 plant structures; LOCATED IN: chloroplast; EXPRESSED DURING: 14 growth stages; CONTAINS InterPro DOMAIN/s: Peptidase S16, lon N-terminal (InterPro:IPR003111)	PUA-like domain | Peptidase S16, lon N-terminal	NO
AT1G35470	5	1:13054096-13054530	-	RI	0.1435	0.040945	0.10256	0.956	K2	0.8599	SPla/RYanodine receptor (SPRY) domain-containing protein	SPla/RYanodine receptor (SPRY) domain-containing protein; CONTAINS InterPro DOMAIN/s: B302 (SPRY)-like (InterPro:IPR001870), CTLH, C-terminal LisH motif (InterPro:IPR006595), SPla/RYanodine receptor SPRY (InterPro:IPR003877), Ran binding protein, CRA domain (InterPro:IPR019589), SPla/RYanodine receptor subgroup (InterPro:IPR018355), LisH dimerisation motif (InterPro:IPR006594), Ran binding protei…	B30.2/SPRY domain | CRA domain | CTLH, C-terminal LisH motif | CTLH/CRA C-terminal to LisH motif domain | Concanavalin A-like lectin/glucanases superfamily | LisH dimerisation motif | Protein Ssh4 like | SPRY domain	NO
AT1G35510	3	1:13071879-13071963	+	RI	0.20159	0.05699	0.1446	0.965	K1	0.8771	O-fucosyltransferase family protein	O-fucosyltransferase family protein; FUNCTIONS IN: molecular_function unknown; INVOLVED IN: biological_process unknown; LOCATED IN: chloroplast; EXPRESSED IN: 22 plant structures; EXPRESSED DURING: 13 growth stages; CONTAINS InterPro DOMAIN/s: GDP-fucose protein O-fucosyltransferase (InterPro:IPR019378); BEST Arabidopsis thaliana protein match is: O-fucosyltransferase family protein (TAIR:AT2G014…	GDP-fucose protein O-fucosyltransferase | O-fucosyltransferase, plant	NO
AT1G35516	3	1:13078930-13079304	+	RI	0.99064	0.62554	0.36509	1	K2	1.3656	myb-like transcription factor family protein	myb-like transcription factor family protein; CONTAINS InterPro DOMAIN/s: Myb transcription factor (InterPro:IPR015495)		NO
AT1G36070	30	1:13466984-13467157	-	RI	0.80476	0.93966	-0.1349	0.915	K1	0.8722	Transducin/WD40 repeat-like superfamily protein	Transducin/WD40 repeat-like superfamily protein; FUNCTIONS IN: molecular_function unknown; INVOLVED IN: biological_process unknown; LOCATED IN: CUL4 RING ubiquitin ligase complex, heterotrimeric G-protein complex; EXPRESSED IN: 22 plant structures; EXPRESSED DURING: 13 growth stages; CONTAINS InterPro DOMAIN/s: WD40 repeat 2 (InterPro:IPR019782), WD40 repeat-like-containing domain (InterPro:IPR01…	WD40 repeat | WD40 repeat, conserved site | WD40-repeat-containing domain | WD40/YVTN repeat-like-containing domain	NO
AT1G42540	2	1:15973301-15973353	+	AD	0.84151	0.19327	0.64823	1	K2	1.3581	glutamate receptor 3.3	glutamate receptor 3.3 (GLR3.3); FUNCTIONS IN: intracellular ligand-gated ion channel activity; INVOLVED IN: cellular calcium ion homeostasis, response to light stimulus; LOCATED IN: integral to membrane, membrane; EXPRESSED IN: 22 plant structures; EXPRESSED DURING: 11 growth stages; CONTAINS InterPro DOMAIN/s: Extracellular solute-binding protein, family 3 (InterPro:IPR001638), Ionotropic gluta…	Extracellular ligand-binding receptor | Extracellular solute-binding protein, family 3 | Ionotropic glutamate receptor | Ionotropic glutamate receptor, plant | Periplasmic binding protein-like I	NO
AT1G42540	3	1:15973354-15973486	+	RI	0.80582	0.1094	0.69642	1	K2	1.3967	glutamate receptor 3.3	glutamate receptor 3.3 (GLR3.3); FUNCTIONS IN: intracellular ligand-gated ion channel activity; INVOLVED IN: cellular calcium ion homeostasis, response to light stimulus; LOCATED IN: integral to membrane, membrane; EXPRESSED IN: 22 plant structures; EXPRESSED DURING: 11 growth stages; CONTAINS InterPro DOMAIN/s: Extracellular solute-binding protein, family 3 (InterPro:IPR001638), Ionotropic gluta…	Extracellular ligand-binding receptor | Extracellular solute-binding protein, family 3 | Ionotropic glutamate receptor | Ionotropic glutamate receptor, plant | Periplasmic binding protein-like I	NO
AT1G43675	3	1:16470814-16470919	+	RI	0.36996	0.55678	-0.18681	0.901	K2	1.5626	transposable element gene	expressed protein		NO
AT1G44000	2	1:16709180-16709335	-	AD	0.49735	0.63639	-0.13904	0.985	K1	0.9992		unknown protein; BEST Arabidopsis thaliana protein match is: unknown protein (TAIR:AT4G11911.1)	Staygreen protein	NO
AT1G44120	8	1:16783922-16784147	+	RI	0.52485	0.25615	0.2687	0.909	K1	0.9957	Armadillo/beta-catenin-like repeat ; C2 calcium/lipid-binding domain (CaLB) protein	Armadillo/beta-catenin-like repeat ; C2 calcium/lipid-binding domain (CaLB) protein; FUNCTIONS IN: binding; INVOLVED IN: biological_process unknown; LOCATED IN: cellular_component unknown; EXPRESSED IN: 8 plant structures; EXPRESSED DURING: L mature pollen stage, M germinated pollen stage, 4 anthesis, petal differentiation and expansion stage; CONTAINS InterPro DOMAIN/s: Armadillo-like helical (I…	Armadillo | Armadillo-like helical | Armadillo-type fold | C2 domain	NO
AT1G45248	9	1:17163346-17163399	-	CE	0.61632	0.77794	-0.16162	0.925	K2	1.9118	Nucleolar histone methyltransferase-related protein	Nucleolar histone methyltransferase-related protein; FUNCTIONS IN: molecular_function unknown; INVOLVED IN: biological_process unknown; LOCATED IN: cellular_component unknown; CONTAINS InterPro DOMAIN/s: WIYLD domain (InterPro:IPR018848); BEST Arabidopsis thaliana protein match is: Nucleolar histone methyltransferase-related protein (TAIR:AT2G40020.2)	WIYLD domain	NO
AT1G48110	3	1:17772859-17773284	-	RI	0.19162	0.02013	0.17149	0.999	K1	0.7554	evolutionarily conserved C-terminal region 7	evolutionarily conserved C-terminal region 7 (ECT7); FUNCTIONS IN: molecular_function unknown; INVOLVED IN: biological_process unknown; LOCATED IN: cellular_component unknown; EXPRESSED IN: 24 plant structures; EXPRESSED DURING: 15 growth stages; CONTAINS InterPro DOMAIN/s: YTH domain (InterPro:IPR007275); BEST Arabidopsis thaliana protein match is: evolutionarily conserved C-terminal region 6 (T…	YTH domain	NO
AT1G48430	33	1:17904916-17905065	-	RI	0.21103	0.38453	-0.1735	0.995	K4	2.116	Dihydroxyacetone kinase	Dihydroxyacetone kinase; FUNCTIONS IN: glycerone kinase activity, ATP binding; INVOLVED IN: glycerol metabolic process; LOCATED IN: cellular_component unknown; EXPRESSED IN: 22 plant structures; EXPRESSED DURING: 13 growth stages; CONTAINS InterPro DOMAIN/s: Dak phosphatase (InterPro:IPR004007), Dihydroxyacetone kinase (InterPro:IPR012734), Dak kinase (InterPro:IPR004006); BEST Arabidopsis thalia…	Dak kinase | DhaL domain | Dihydroxyacetone kinase	NO
AT1G48430	36	1:17904704-17904845	-	RI	0.20054	0.33166	-0.13111	0.925	K4	2.116	Dihydroxyacetone kinase	Dihydroxyacetone kinase; FUNCTIONS IN: glycerone kinase activity, ATP binding; INVOLVED IN: glycerol metabolic process; LOCATED IN: cellular_component unknown; EXPRESSED IN: 22 plant structures; EXPRESSED DURING: 13 growth stages; CONTAINS InterPro DOMAIN/s: Dak phosphatase (InterPro:IPR004007), Dihydroxyacetone kinase (InterPro:IPR012734), Dak kinase (InterPro:IPR004006); BEST Arabidopsis thalia…	Dak kinase | DhaL domain | Dihydroxyacetone kinase	NO
AT1G48460	4	1:17911559-17911653	+	RI	0.036727	0.15255	-0.11583	0.975	K1	0.6807		unknown protein; FUNCTIONS IN: molecular_function unknown; INVOLVED IN: biological_process unknown; LOCATED IN: chloroplast envelope; EXPRESSED IN: 21 plant structures; EXPRESSED DURING: 13 growth stages; BEST Arabidopsis thaliana protein match is: unknown protein (TAIR:AT5G63040.1)		NO
AT1G48635	5	1:17983965-17984144	+	RI	0.22779	0.05742	0.17037	0.997	K2	1.0123	peroxin 3	peroxin 3 (PEX3); FUNCTIONS IN: molecular_function unknown; INVOLVED IN: peroxisome organization; LOCATED IN: mitochondrion, peroxisome, integral to peroxisomal membrane; CONTAINS InterPro DOMAIN/s: Peroxin-3 (InterPro:IPR006966); BEST Arabidopsis thaliana protein match is: peroxin 3-1 (TAIR:AT3G18160.1)	Peroxin-3	NO
AT1G49010	3	1:18133139-18133258	+	RI	0.62806	0.50443	0.12364	0.905	K1	0.9923	Duplicated homeodomain-like superfamily protein	Duplicated homeodomain-like superfamily protein; CONTAINS InterPro DOMAIN/s: Molecular chaperone, heat shock protein, Hsp40, DnaJ (InterPro:IPR015609), SANT, eukarya (InterPro:IPR017884), Myb-like DNA-binding domain, SHAQKYF class (InterPro:IPR006447), SANT, DNA-binding (InterPro:IPR001005), Myb, DNA-binding (InterPro:IPR014778), Homeodomain-like (InterPro:IPR009057), HTH transcriptional regulato…	Homeodomain-like | Myb domain | Myb domain, plants | SANT domain | SANT/Myb domain	NO
AT1G49130	2	1:18175799-18175902	-	RI	0.74828	0.58514	0.16313	0.982	K1	0.985	B-box type zinc finger protein with CCT domain	B-box type zinc finger protein with CCT domain; FUNCTIONS IN: sequence-specific DNA binding transcription factor activity, zinc ion binding; INVOLVED IN: regulation of transcription; LOCATED IN: intracellular; CONTAINS InterPro DOMAIN/s: CCT domain (InterPro:IPR010402), Zinc finger, B-box (InterPro:IPR000315); BEST Arabidopsis thaliana protein match is: B-box type zinc finger protein with CCT dom…	CCT domain | Zinc finger, B-box	NO
AT1G49360	5	1:18269192-18269247	-	RI	0.37203	0.14895	0.22308	0.975	K2	1.1401	F-box family protein	F-box family protein; CONTAINS InterPro DOMAIN/s: F-box domain, cyclin-like (InterPro:IPR001810), F-box domain, Skp2-like (InterPro:IPR022364); BEST Arabidopsis thaliana protein match is: F-box family protein (TAIR:AT1G57790.1)	F-box domain | Galactose oxidase/kelch, beta-propeller	NO
AT1G49360	6	1:18269171-18269191	-	AA	0.38579	0.18052	0.20527	0.954	K2	1.137	F-box family protein	F-box family protein; CONTAINS InterPro DOMAIN/s: F-box domain, cyclin-like (InterPro:IPR001810), F-box domain, Skp2-like (InterPro:IPR022364); BEST Arabidopsis thaliana protein match is: F-box family protein (TAIR:AT1G57790.1)	F-box domain | Galactose oxidase/kelch, beta-propeller	NO
AT1G49480	8	1:18315623-18316033	-	RI	0.19079	0.01654	0.17425	1	K2	0.745	related to vernalization1 1	related to vernalization1 1 (RTV1); FUNCTIONS IN: DNA binding, sequence-specific DNA binding transcription factor activity; INVOLVED IN: regulation of transcription, DNA-dependent; LOCATED IN: cellular_component unknown; EXPRESSED IN: 22 plant structures; EXPRESSED DURING: 13 growth stages; CONTAINS InterPro DOMAIN/s: Transcriptional factor B3 (InterPro:IPR003340); BEST Arabidopsis thaliana prote…	B3 DNA binding domain | DNA-binding pseudobarrel domain	NO
AT1G49832	4	1:18447888-18447971	+	RI	0.68849	0.39608	0.29241	0.936	K2	1.3464	None;(source:Araport11)			NO
AT1G49950	11	1:18496751-18496839	-	RI	0.25155	0.017354	0.2342	1	K3	1.5461	telomere repeat binding factor 1	telomere repeat binding factor 1 (TRB1); FUNCTIONS IN: DNA binding, protein homodimerization activity, sequence-specific DNA binding transcription factor activity, double-stranded telomeric DNA binding; INVOLVED IN: in 8 processes; LOCATED IN: nucleus, nucleosome; EXPRESSED IN: 24 plant structures; EXPRESSED DURING: 14 growth stages; CONTAINS InterPro DOMAIN/s: Winged helix-turn-helix transcripti…	Homeodomain-like | Linker histone H1/H5, domain H15 | Myb domain | SANT/Myb domain | Winged helix-turn-helix DNA-binding domain	NO
AT1G49950	7	1:18497040-18497083	-	RI	0.25359	0.049001	0.20459	0.996	K3	1.5461	telomere repeat binding factor 1	telomere repeat binding factor 1 (TRB1); FUNCTIONS IN: DNA binding, protein homodimerization activity, sequence-specific DNA binding transcription factor activity, double-stranded telomeric DNA binding; INVOLVED IN: in 8 processes; LOCATED IN: nucleus, nucleosome; EXPRESSED IN: 24 plant structures; EXPRESSED DURING: 14 growth stages; CONTAINS InterPro DOMAIN/s: Winged helix-turn-helix transcripti…	Homeodomain-like | Linker histone H1/H5, domain H15 | Myb domain | SANT/Myb domain | Winged helix-turn-helix DNA-binding domain	NO
AT1G50410	7	1:18672305-18672485	+	RI	0.2907	0.044685	0.24601	0.998	K3	1.1346	SNF2 domain-containing protein / helicase domain-containing protein / zinc finger protein-related	SNF2 domain-containing protein / helicase domain-containing protein / zinc finger protein-related; FUNCTIONS IN: helicase activity, DNA binding, zinc ion binding, nucleic acid binding, ATP binding; EXPRESSED IN: 24 plant structures; EXPRESSED DURING: 14 growth stages; CONTAINS InterPro DOMAIN/s: Zinc finger, RING-type, conserved site (InterPro:IPR017907), Zinc finger, RING-type (InterPro:IPR00184…	Helicase, C-terminal | Helicase, superfamily 1/2, ATP-binding domain | P-loop containing nucleoside triphosphate hydrolase | SNF2-related | Zinc finger, RING-type | Zinc finger, RING-type, conserved site | Zinc finger, RING/FYVE/PHD-type	NO
AT1G50410	8	1:18672486-18672582	+	CE	0.29581	0.066105	0.22971	0.999	K3	1.1346	SNF2 domain-containing protein / helicase domain-containing protein / zinc finger protein-related	SNF2 domain-containing protein / helicase domain-containing protein / zinc finger protein-related; FUNCTIONS IN: helicase activity, DNA binding, zinc ion binding, nucleic acid binding, ATP binding; EXPRESSED IN: 24 plant structures; EXPRESSED DURING: 14 growth stages; CONTAINS InterPro DOMAIN/s: Zinc finger, RING-type, conserved site (InterPro:IPR017907), Zinc finger, RING-type (InterPro:IPR00184…	Helicase, C-terminal | Helicase, superfamily 1/2, ATP-binding domain | P-loop containing nucleoside triphosphate hydrolase | SNF2-related | Zinc finger, RING-type | Zinc finger, RING-type, conserved site | Zinc finger, RING/FYVE/PHD-type	NO
AT1G50410	9	1:18672583-18672780	+	RI	0.24279	0.037484	0.2053	1	K3	1.1346	SNF2 domain-containing protein / helicase domain-containing protein / zinc finger protein-related	SNF2 domain-containing protein / helicase domain-containing protein / zinc finger protein-related; FUNCTIONS IN: helicase activity, DNA binding, zinc ion binding, nucleic acid binding, ATP binding; EXPRESSED IN: 24 plant structures; EXPRESSED DURING: 14 growth stages; CONTAINS InterPro DOMAIN/s: Zinc finger, RING-type, conserved site (InterPro:IPR017907), Zinc finger, RING-type (InterPro:IPR00184…	Helicase, C-terminal | Helicase, superfamily 1/2, ATP-binding domain | P-loop containing nucleoside triphosphate hydrolase | SNF2-related | Zinc finger, RING-type | Zinc finger, RING-type, conserved site | Zinc finger, RING/FYVE/PHD-type	NO
AT1G50440	5	1:18685967-18686060	+	RI	0.49826	0.27742	0.22084	0.992	K3	1.5456	RING/FYVE/PHD zinc finger superfamily protein	RING/FYVE/PHD zinc finger superfamily protein; FUNCTIONS IN: zinc ion binding; EXPRESSED IN: 22 plant structures; EXPRESSED DURING: 13 growth stages; CONTAINS InterPro DOMAIN/s: Zinc finger, C3HC4 RING-type (InterPro:IPR018957), Zinc finger, RING-CH-type (InterPro:IPR011016); BEST Arabidopsis thaliana protein match is: RING/FYVE/PHD zinc finger superfamily protein (TAIR:AT1G11020.1)	Zinc finger, RING-CH-type | Zinc finger, RING/FYVE/PHD-type	NO
AT1G50460	13	1:18695111-18695226	+	RI	0.22867	0.06655	0.16212	0.954	K2	1.1011	hexokinase-like 1	hexokinase-like 1 (HKL1); FUNCTIONS IN: hexokinase activity, ATP binding; INVOLVED IN: response to salt stress, response to cold, response to osmotic stress; LOCATED IN: mitochondrion, plastid; EXPRESSED IN: 26 plant structures; EXPRESSED DURING: 13 growth stages; CONTAINS InterPro DOMAIN/s: Hexokinase, N-terminal (InterPro:IPR022672), Hexokinase, C-terminal (InterPro:IPR022673), Hexokinase (Inte…	Hexokinase | Hexokinase, C-terminal | Hexokinase, N-terminal	NO
AT1G50570	3	1:18727828-18728108	-	AD	0.79139	0.49544	0.29595	1	K1	0.9998	Calcium-dependent lipid-binding (CaLB domain) family protein	Calcium-dependent lipid-binding (CaLB domain) family protein; CONTAINS InterPro DOMAIN/s: C2 calcium/lipid-binding domain, CaLB (InterPro:IPR008973), C2 calcium-dependent membrane targeting (InterPro:IPR000008); BEST Arabidopsis thaliana protein match is: Calcium-dependent lipid-binding (CaLB domain) family protein (TAIR:AT5G55530.2)	C2 domain	NO
AT1G50570	4	1:18727575-18727827	-	RI	0.25817	0.074515	0.18365	1	K2	1.4399	Calcium-dependent lipid-binding (CaLB domain) family protein	Calcium-dependent lipid-binding (CaLB domain) family protein; CONTAINS InterPro DOMAIN/s: C2 calcium/lipid-binding domain, CaLB (InterPro:IPR008973), C2 calcium-dependent membrane targeting (InterPro:IPR000008); BEST Arabidopsis thaliana protein match is: Calcium-dependent lipid-binding (CaLB domain) family protein (TAIR:AT5G55530.2)	C2 domain	NO
AT1G50670	8	1:18776570-18776785	-	RI	0.54985	0.087812	0.46204	0.999	K4	2.0299	OTU-like cysteine protease family protein	OTU-like cysteine protease family protein; FUNCTIONS IN: cysteine-type peptidase activity; INVOLVED IN: biological_process unknown; EXPRESSED IN: 23 plant structures; EXPRESSED DURING: 16 growth stages; CONTAINS InterPro DOMAIN/s: Ovarian tumour, otubain (InterPro:IPR003323)	Ovarian tumour, otubain	NO
AT1G50970	34	1:18898789-18898881	+	RI	0.38402	0.55109	-0.16707	0.957	K2	1.469	Membrane trafficking VPS53 family protein	Membrane trafficking VPS53 family protein; FUNCTIONS IN: transporter activity; INVOLVED IN: transport; LOCATED IN: endomembrane system; EXPRESSED IN: 18 plant structures; EXPRESSED DURING: 10 growth stages; CONTAINS InterPro DOMAIN/s: Vps53-like, N-terminal (InterPro:IPR007234); BEST Arabidopsis thaliana protein match is: Membrane trafficking VPS53 family protein (TAIR:AT1G50500.1)	Vps53-like, N-terminal	NO
AT1G51200	6	1:18984562-18984723	+	RI	0.19078	0.039334	0.15144	1	K4	0.8506	A20/AN1-like zinc finger family protein	A20/AN1-like zinc finger family protein; FUNCTIONS IN: DNA binding, zinc ion binding; INVOLVED IN: biological_process unknown; LOCATED IN: cellular_component unknown; EXPRESSED IN: 24 plant structures; EXPRESSED DURING: 15 growth stages; CONTAINS InterPro DOMAIN/s: Zinc finger, AN1-type (InterPro:IPR000058), Zinc finger, A20-type (InterPro:IPR002653); BEST Arabidopsis thaliana protein match is: A…	Zinc finger, A20-type | Zinc finger, AN1-type	NO
AT1G51560	14	1:19120962-19121042	-	RI	0.17971	0.074854	0.10486	0.979	K3	1.128	Pyridoxamine 5'-phosphate oxidase family protein	Pyridoxamine 5'-phosphate oxidase family protein; FUNCTIONS IN: FMN binding; LOCATED IN: chloroplast; CONTAINS InterPro DOMAIN/s: FMN-binding split barrel (InterPro:IPR012349), Pyridoxamine 5&apos;-phosphate oxidase-like, FMN-binding domain (InterPro:IPR011576), FMN-binding split barrel, related (InterPro:IPR009002); BEST Arabidopsis thaliana protein match is: Pyridoxamine 5'-phosphate oxidase fa…	FMN-binding split barrel	NO
AT1G51590	2	1:19131640-19131973	-	RI	0.21874	0.012096	0.20665	1	K1	0.8293	alpha-mannosidase 1	alpha-mannosidase 1 (MNS1); CONTAINS InterPro DOMAIN/s: Glycoside hydrolase, family 47 (InterPro:IPR001382); BEST Arabidopsis thaliana protein match is: alpha-mannosidase 2 (TAIR:AT3G21160.1)	Glycoside hydrolase, family 47	NO
AT1G51600	3	1:19132667-19133154	+	RI	0.55129	0.078516	0.47278	0.985	K1	0.994	ZIM-LIKE 2	ZIM-LIKE 2 (ZML2); FUNCTIONS IN: sequence-specific DNA binding, sequence-specific DNA binding transcription factor activity, zinc ion binding; FUNCTIONS IN: sequence-specific DNA binding, zinc ion binding, sequence-specific DNA binding transcription factor activity; INVOLVED IN: regulation of transcription, DNA-dependent; EXPRESSED IN: 24 plant structures; EXPRESSED DURING: 14 growth stages; CONT…	CCT domain | Tify | Zinc finger, GATA-type | Zinc finger, NHR/GATA-type	NO
AT1G52000	6	1:19335898-19335984	-	AD	0.027476	0.18336	-0.15589	0.913	K3	1.4825	Mannose-binding lectin superfamily protein	Mannose-binding lectin superfamily protein; FUNCTIONS IN: molecular_function unknown; INVOLVED IN: response to salt stress; LOCATED IN: cellular_component unknown; EXPRESSED IN: 22 plant structures; EXPRESSED DURING: 14 growth stages; CONTAINS InterPro DOMAIN/s: Mannose-binding lectin (InterPro:IPR001229); BEST Arabidopsis thaliana protein match is: myrosinase-binding protein 1 (TAIR:AT1G52040.1)	Mannose-binding lectin	NO
AT1G52080	4	1:19369616-19369703	+	RI	0.15472	0.051586	0.10313	0.927	K1	0.6501	actin binding protein family	AR791; FUNCTIONS IN: actin binding; LOCATED IN: endomembrane system; EXPRESSED IN: 22 plant structures; EXPRESSED DURING: 13 growth stages; BEST Arabidopsis thaliana protein match is: Hydroxyproline-rich glycoprotein family protein (TAIR:AT3G25690.2)		NO
AT1G52100	6	1:19385141-19385232	-	RI	0.25534	0.049716	0.20562	1	K2	1.1753	Mannose-binding lectin superfamily protein	Mannose-binding lectin superfamily protein; FUNCTIONS IN: molecular_function unknown; INVOLVED IN: biological_process unknown; EXPRESSED IN: shoot, hypocotyl; LOCATED IN: membrane; CONTAINS InterPro DOMAIN/s: Mannose-binding lectin (InterPro:IPR001229); EXPRESSED IN: shoot, cotyledon, hypocotyl, leaf; BEST Arabidopsis thaliana protein match is: Mannose-binding lectin superfamily protein (TAIR:AT5…	Mannose-binding lectin	NO
AT1G52370	3	1:19506523-19506571	+	AD	0.4911	0.22794	0.26316	0.999	K3	1.4323	Ribosomal protein L22p/L17e family protein	Ribosomal protein L22p/L17e family protein; FUNCTIONS IN: structural constituent of ribosome; INVOLVED IN: translation; LOCATED IN: ribosome, intracellular, large ribosomal subunit; CONTAINS InterPro DOMAIN/s: Ribosomal protein L22/L17 (InterPro:IPR001063), Ribosomal protein L22, bacterial-type (InterPro:IPR005727); BEST Arabidopsis thaliana protein match is: Ribosomal protein L22p/L17e family pr…	Ribosomal protein L22, bacterial/chloroplast-type | Ribosomal protein L22/L17	NO
AT1G52370	6	1:19506766-19507017	+	RI	0.44169	0.14653	0.29516	0.999	K4	1.5605	Ribosomal protein L22p/L17e family protein	Ribosomal protein L22p/L17e family protein; FUNCTIONS IN: structural constituent of ribosome; INVOLVED IN: translation; LOCATED IN: ribosome, intracellular, large ribosomal subunit; CONTAINS InterPro DOMAIN/s: Ribosomal protein L22/L17 (InterPro:IPR001063), Ribosomal protein L22, bacterial-type (InterPro:IPR005727); BEST Arabidopsis thaliana protein match is: Ribosomal protein L22p/L17e family pr…	Ribosomal protein L22, bacterial/chloroplast-type | Ribosomal protein L22/L17	NO
AT1G52540	2	1:19571537-19571840	-	RI	0.26967	0.1086	0.16107	0.972	K1	0.8898	Protein kinase superfamily protein	Protein kinase superfamily protein; FUNCTIONS IN: protein tyrosine kinase activity, protein kinase activity, kinase activity, ATP binding; INVOLVED IN: protein amino acid phosphorylation; LOCATED IN: plasma membrane; EXPRESSED IN: 23 plant structures; EXPRESSED DURING: 13 growth stages; CONTAINS InterPro DOMAIN/s: Protein kinase, ATP binding site (InterPro:IPR017441), Protein kinase, catalytic do…	Protein kinase domain | Protein kinase, ATP binding site | Protein kinase-like domain | Serine-threonine/tyrosine-protein kinase catalytic domain | Tyrosine-protein kinase, active site	NO
AT1G52565	3	1:19580303-19580363	-	RI	0.5324	0.31987	0.21253	0.928	K1	0.9944		unknown protein; FUNCTIONS IN: molecular_function unknown; INVOLVED IN: biological_process unknown; LOCATED IN: endomembrane system; BEST Arabidopsis thaliana protein match is: unknown protein (TAIR:AT3G15760.1)		NO
AT1G52710	6	1:19640017-19640085	-	RI	0.91905	0.52665	0.3924	1	K2	1.1133	Rubredoxin-like superfamily protein	Rubredoxin-like superfamily protein; FUNCTIONS IN: cytochrome-c oxidase activity; INVOLVED IN: biological_process unknown; LOCATED IN: mitochondrial envelope; CONTAINS InterPro DOMAIN/s: Cytochrome c oxidase, subunit Vb (InterPro:IPR002124); BEST Arabidopsis thaliana protein match is: Rubredoxin-like superfamily protein (TAIR:AT3G15640.1)	Cytochrome c oxidase, subunit Vb	NO
AT1G52730	3	1:19642669-19642853	+	RI	0.99139	0.83847	0.15291	1	K1	0.7334	Transducin/WD40 repeat-like superfamily protein	Transducin/WD40 repeat-like superfamily protein; CONTAINS InterPro DOMAIN/s: WD40 repeat 2 (InterPro:IPR019782), WD40 repeat-like-containing domain (InterPro:IPR011046), WD40 repeat, conserved site (InterPro:IPR019775), WD40-repeat-containing domain (InterPro:IPR017986), WD40/YVTN repeat-like-containing domain (InterPro:IPR015943), WD40 repeat (InterPro:IPR001680), WD40 repeat, subgroup (InterPro…	WD40 repeat | WD40 repeat, conserved site | WD40-repeat-containing domain | WD40/YVTN repeat-like-containing domain	NO
AT1G52905	3	1:19706112-19706260	+	AD	0.77898	0.95369	-0.17471	0.999	K1	0.8163		unknown protein; BEST Arabidopsis thaliana protein match is: unknown protein (TAIR:AT1G27565.1)		YES	1:19706117:T-C;exonic_variant
AT1G52905	4	1:19706261-19706384	+	RI	0.26012	0.064265	0.19586	1	K2	1.4409		unknown protein; BEST Arabidopsis thaliana protein match is: unknown protein (TAIR:AT1G27565.1)		NO
AT1G53090	5	1:19783571-19783683	+	RI	0.82165	0.47721	0.34444	0.991	K2	1.555	SPA1-related 4	SPA1-related 4 (SPA4); FUNCTIONS IN: protein binding, signal transducer activity; INVOLVED IN: protein amino acid phosphorylation; LOCATED IN: CUL4 RING ubiquitin ligase complex, heterotrimeric G-protein complex; EXPRESSED IN: 19 plant structures; EXPRESSED DURING: 11 growth stages; CONTAINS InterPro DOMAIN/s: WD40 repeat 2 (InterPro:IPR019782), WD40 repeat, conserved site (InterPro:IPR019775), W…	G-protein beta WD-40 repeat | Protein kinase domain | Protein kinase-like domain | WD40 repeat | WD40 repeat, conserved site | WD40-repeat-containing domain | WD40/YVTN repeat-like-containing domain	NO
AT1G53160	9	1:19807024-19807087	+	AD	0.93641	0.747	0.1894	0.954	K2	1.3247	squamosa promoter binding protein-like 4	squamosa promoter binding protein-like 4 (SPL4); FUNCTIONS IN: DNA binding, sequence-specific DNA binding transcription factor activity; INVOLVED IN: regulation of vegetative phase change, regulation of transcription; LOCATED IN: nucleus; EXPRESSED IN: 22 plant structures; EXPRESSED DURING: 13 growth stages; CONTAINS InterPro DOMAIN/s: Squamosa promoter-binding protein (InterPro:IPR017238), Trans…	Squamosa promoter-binding protein | Transcription factor, SBP-box	NO
AT1G53165	27	1:19816514-19816662	+	RI	0.07065	0.23758	-0.16693	0.985	K1	0.8397	Protein kinase superfamily protein	ATMAP4K ALPHA1; FUNCTIONS IN: protein serine/threonine kinase activity, protein kinase activity, kinase activity, ATP binding; INVOLVED IN: response to salt stress, hyperosmotic response, response to wounding; EXPRESSED IN: 23 plant structures; EXPRESSED DURING: 13 growth stages; CONTAINS InterPro DOMAIN/s: Protein kinase, ATP binding site (InterPro:IPR017441), Protein kinase, catalytic domain (I…	Protein kinase domain | Protein kinase, ATP binding site | Protein kinase-like domain | Serine/threonine/dual specificity protein kinase, catalytic domain	NO
AT1G53310	5	1:19888229-19888304	-	AD	0.29398	0.059949	0.23403	0.97	K2	1.2739	phosphoenolpyruvate carboxylase 1	phosphoenolpyruvate carboxylase 1 (PPC1); FUNCTIONS IN: protein binding, phosphoenolpyruvate carboxylase activity; INVOLVED IN: response to salt stress, tricarboxylic acid cycle; LOCATED IN: cytosol, apoplast; EXPRESSED IN: 26 plant structures; EXPRESSED DURING: 13 growth stages; CONTAINS InterPro DOMAIN/s: Pyruvate/Phosphoenolpyruvate kinase, catalytic core (InterPro:IPR015813), Phosphoenolpyruv…	Phosphoenolpyruvate carboxylase | Phosphoenolpyruvate carboxylase, active site | Phosphoenolpyruvate carboxylase, bacterial/plant-type | Pyruvate/Phosphoenolpyruvate kinase-like domain	NO
AT1G53310	6	1:19888089-19888228	-	RI	0.2024	0.079526	0.12287	0.995	K2	1.36	phosphoenolpyruvate carboxylase 1	phosphoenolpyruvate carboxylase 1 (PPC1); FUNCTIONS IN: protein binding, phosphoenolpyruvate carboxylase activity; INVOLVED IN: response to salt stress, tricarboxylic acid cycle; LOCATED IN: cytosol, apoplast; EXPRESSED IN: 26 plant structures; EXPRESSED DURING: 13 growth stages; CONTAINS InterPro DOMAIN/s: Pyruvate/Phosphoenolpyruvate kinase, catalytic core (InterPro:IPR015813), Phosphoenolpyruv…	Phosphoenolpyruvate carboxylase | Phosphoenolpyruvate carboxylase, active site | Phosphoenolpyruvate carboxylase, bacterial/plant-type | Pyruvate/Phosphoenolpyruvate kinase-like domain	NO
AT1G53350	6	1:19904181-19904279	+	EI/RI	0.6708	0.87517	-0.20437	0.945	K3	1.485	Disease resistance protein (CC-NBS-LRR class) family	Disease resistance protein (CC-NBS-LRR class) family; FUNCTIONS IN: ATP binding; INVOLVED IN: apoptosis, defense response; EXPRESSED IN: 19 plant structures; EXPRESSED DURING: 9 growth stages; CONTAINS InterPro DOMAIN/s: NB-ARC (InterPro:IPR002182), Disease resistance protein (InterPro:IPR000767); BEST Arabidopsis thaliana protein match is: Disease resistance protein (CC-NBS-LRR class) family (TA…		NO
AT1G53350	6	1:19904181-19904279	+	RI	0.6708	0.87517	-0.20437	0.945	K3	1.485	Disease resistance protein (CC-NBS-LRR class) family	Disease resistance protein (CC-NBS-LRR class) family; FUNCTIONS IN: ATP binding; INVOLVED IN: apoptosis, defense response; EXPRESSED IN: 19 plant structures; EXPRESSED DURING: 9 growth stages; CONTAINS InterPro DOMAIN/s: NB-ARC (InterPro:IPR002182), Disease resistance protein (InterPro:IPR000767); BEST Arabidopsis thaliana protein match is: Disease resistance protein (CC-NBS-LRR class) family (TA…		NO
AT1G53500	2	1:19969249-19969457	-	RI	0.20143	0.043379	0.15805	0.984	K1	0.8412	NAD-dependent epimerase/dehydratase family protein	MUCILAGE-MODIFIED 4 (MUM4); FUNCTIONS IN: UDP-4-keto-rhamnose-4-keto-reductase activity, UDP-4-keto-6-deoxy-glucose-3,5-epimerase activity, catalytic activity, UDP-glucose 4,6-dehydratase activity, UDP-L-rhamnose synthase activity; INVOLVED IN: seed coat development, UDP-rhamnose biosynthetic process, mucilage biosynthetic process, metabolic process; LOCATED IN: soluble fraction; EXPRESSED IN: 28…	NAD(P)-binding domain | NAD-dependent epimerase/dehydratase, N-terminal domain | dTDP-4-dehydrorhamnose reductase | dTDP-glucose 4,6-dehydratase	NO
AT1G54250	8	1:20255134-20255209	+	RI	0.14436	0.040409	0.10396	0.998	K2	0.6302	RNA polymerase Rpb8	NRPB8A; FUNCTIONS IN: DNA-directed RNA polymerase activity; INVOLVED IN: transcription; LOCATED IN: DNA-directed RNA polymerase II, core complex; CONTAINS InterPro DOMAIN/s: Nucleic acid-binding, OB-fold-like (InterPro:IPR016027), Nucleic acid-binding, OB-fold (InterPro:IPR012340), RNA polymerase, Rpb8 (InterPro:IPR005570); BEST Arabidopsis thaliana protein match is: RNA polymerase Rpb8 (TAIR:AT3…	Nucleic acid-binding, OB-fold | RNA polymerase, Rpb8	NO
AT1G54320	3	1:20277463-20277705	-	RI	0.18342	0.059391	0.12403	0.997	K1	0.7598	LEM3 (ligand-effect modulator 3) family protein / CDC50 family protein	LEM3 (ligand-effect modulator 3) family protein / CDC50 family protein; INVOLVED IN: biological_process unknown; LOCATED IN: chloroplast, membrane; EXPRESSED IN: 24 plant structures; EXPRESSED DURING: 15 growth stages; CONTAINS InterPro DOMAIN/s: Protein of unknown function DUF284, transmembrane eukaryotic (InterPro:IPR005045); BEST Arabidopsis thaliana protein match is: ALA-interacting subunit 1…	CDC50/LEM3 family	NO
AT1G54370	20	1:20294825-20294885	-	CE	0.74425	0.8605	-0.11625	0.952	K5	3.1938	sodium hydrogen exchanger 5	sodium hydrogen exchanger 5 (NHX5); FUNCTIONS IN: sodium:hydrogen antiporter activity, sodium ion transmembrane transporter activity; INVOLVED IN: lithium ion transport, sodium ion transport; LOCATED IN: integral to membrane; EXPRESSED IN: 23 plant structures; EXPRESSED DURING: 13 growth stages; CONTAINS InterPro DOMAIN/s: Na+/H+ exchanger, subfamily (InterPro:IPR004709), Na+/H+ exchanger, isofor…	Cation/H+ exchanger | Cation/H+ exchanger, CPA1 family | Na+/H+ exchanger	NO
AT1G54380	5	1:20299611-20299689	-	CE	0.47587	0.67554	-0.19967	0.957	K2	1.3466	spliceosome protein-related	spliceosome protein-related; FUNCTIONS IN: molecular_function unknown; INVOLVED IN: spliceosome assembly, nuclear mRNA splicing, via spliceosome; LOCATED IN: cellular_component unknown; EXPRESSED IN: 22 plant structures; EXPRESSED DURING: 13 growth stages; CONTAINS InterPro DOMAIN/s: Survival motor neuron interacting protein 1 (InterPro:IPR007022); BEST Arabidopsis thaliana protein match is: unkn…	Gem-associated protein 2	NO
AT1G54380	7	1:20299245-20299610	-	RI	0.4458	0.62573	-0.17993	0.935	K2	1.3416	spliceosome protein-related	spliceosome protein-related; FUNCTIONS IN: molecular_function unknown; INVOLVED IN: spliceosome assembly, nuclear mRNA splicing, via spliceosome; LOCATED IN: cellular_component unknown; EXPRESSED IN: 22 plant structures; EXPRESSED DURING: 13 growth stages; CONTAINS InterPro DOMAIN/s: Survival motor neuron interacting protein 1 (InterPro:IPR007022); BEST Arabidopsis thaliana protein match is: unkn…	Gem-associated protein 2	NO
AT1G54510	8	1:20362034-20362360	-	RI	0.56805	0.20305	0.365	0.989	K2	1.386	NIMA-related serine/threonine kinase 1	NIMA-related serine/threonine kinase 1 (NEK1); FUNCTIONS IN: protein serine/threonine kinase activity, protein kinase activity, kinase activity, ATP binding; INVOLVED IN: protein amino acid phosphorylation; LOCATED IN: cellular_component unknown; EXPRESSED IN: 18 plant structures; EXPRESSED DURING: 7 growth stages; CONTAINS InterPro DOMAIN/s: Protein kinase, ATP binding site (InterPro:IPR017441),…	Protein kinase domain | Protein kinase, ATP binding site | Protein kinase-like domain | Serine/threonine-protein kinase, active site | Serine/threonine/dual specificity protein kinase, catalytic domain	NO
AT1G54680	4	1:20413246-20413318	+	RI	0.21708	0.044996	0.17208	0.94	K1	0.9183		unknown protein; FUNCTIONS IN: molecular_function unknown; INVOLVED IN: biological_process unknown; LOCATED IN: endomembrane system; EXPRESSED IN: 22 plant structures; EXPRESSED DURING: 13 growth stages; BEST Arabidopsis thaliana protein match is: unknown protein (TAIR:AT5G27290.1)		NO
AT1G54730	47	1:20429774-20429853	+	RI	0.43591	0.57346	-0.13756	0.947	K1	0.9987	Major facilitator superfamily protein	Major facilitator superfamily protein; FUNCTIONS IN: carbohydrate transmembrane transporter activity, sugar:hydrogen symporter activity; INVOLVED IN: transport, transmembrane transport; LOCATED IN: integral to membrane, membrane; EXPRESSED IN: 22 plant structures; EXPRESSED DURING: 13 growth stages; CONTAINS InterPro DOMAIN/s: Sugar transporter, conserved site (InterPro:IPR005829), Major facilita…	General substrate transporter | Major facilitator superfamily domain | Major facilitator superfamily domain, general substrate transporter | Sugar transporter, conserved site | Sugar/inositol transporter	NO
AT1G55170	2	1:20580362-20580567	+	RI	0.35972	0.066725	0.29299	0.996	K1	0.9948		unknown protein; BEST Arabidopsis thaliana protein match is: unknown protein (TAIR:AT3G14750.1)		NO
AT1G55180	5	1:20585984-20586066	-	RI	0.8877	0.61569	0.27201	0.952	K1	1	phospholipase D alpha 4	phospholipase D alpha 4 (PLDEPSILON); CONTAINS InterPro DOMAIN/s: C2 calcium/lipid-binding domain, CaLB (InterPro:IPR008973), Phospholipase D (InterPro:IPR015679), Phospholipase D, plant (InterPro:IPR011402), Phospholipase D/Transphosphatidylase (InterPro:IPR001736), C2 calcium-dependent membrane targeting (InterPro:IPR000008); BEST Arabidopsis thaliana protein match is: phospholipase D alpha 1 (…	C2 domain | Phospholipase D family | Phospholipase D, C-terminal | Phospholipase D, plant | Phospholipase D-like domain | Phospholipase D/Transphosphatidylase	NO
AT1G55200	6	1:20592141-20592318	-	RI	0.97431	0.84803	0.12627	0.953	K1	0.5918	Protein kinase protein with adenine nucleotide alpha hydrolases-like domain	Protein kinase protein with adenine nucleotide alpha hydrolases-like domain; FUNCTIONS IN: protein tyrosine kinase activity, protein kinase activity, kinase activity, ATP binding; INVOLVED IN: protein amino acid phosphorylation; LOCATED IN: plasma membrane; EXPRESSED IN: 17 plant structures; EXPRESSED DURING: 7 growth stages; CONTAINS InterPro DOMAIN/s: Protein kinase, catalytic domain (InterPro:…	Concanavalin A-like lectin/glucanase, subgroup | Protein kinase domain | Protein kinase-like domain | Rossmann-like alpha/beta/alpha sandwich fold | Serine-threonine/tyrosine-protein kinase catalytic domain | Tyrosine-protein kinase, active site	NO
AT1G55270	4	1:20619572-20619821	-	RI	0.1566	0.024777	0.13182	0.979	K1	0.7293	Galactose oxidase/kelch repeat superfamily protein	Galactose oxidase/kelch repeat superfamily protein; CONTAINS InterPro DOMAIN/s: F-box domain, cyclin-like (InterPro:IPR001810), Galactose oxidase/kelch, beta-propeller (InterPro:IPR011043), Kelch repeat type 1 (InterPro:IPR006652), Kelch related (InterPro:IPR013089), Kelch-type beta propeller (InterPro:IPR015915); BEST Arabidopsis thaliana protein match is: Galactose oxidase/kelch repeat superfam…	F-box domain | Galactose oxidase, beta-propeller | Kelch repeat type 1	NO
AT1G55340	4	1:20652109-20652307	+	RI	0.5238	0.022908	0.5009	1	K3	1.3327	Protein of unknown function (DUF1639)	Protein of unknown function (DUF1639); FUNCTIONS IN: molecular_function unknown; INVOLVED IN: biological_process unknown; LOCATED IN: cellular_component unknown; CONTAINS InterPro DOMAIN/s: Protein of unknown function DUF1639 (InterPro:IPR012438); BEST Arabidopsis thaliana protein match is: Protein of unknown function (DUF1639) (TAIR:AT3G03880.1)	Protein of unknown function DUF1639	NO
AT1G55475	4	1:20712029-20712114	+	RI	0.26948	0.40806	-0.13857	0.905	K1	0.9834		unknown protein; FUNCTIONS IN: molecular_function unknown; INVOLVED IN: biological_process unknown; LOCATED IN: endomembrane system; BEST Arabidopsis thaliana protein match is: unknown protein (TAIR:AT3G13480.1)		NO
AT1G55520	3	1:20727487-20727827	-	RI	0.21954	0.026027	0.19351	1	K2	0.8167	TATA binding protein 2	TATA binding protein 2 (TBP2); CONTAINS InterPro DOMAIN/s: TATA-box binding (InterPro:IPR000814), Beta2-adaptin/TATA-box binding, C-terminal (InterPro:IPR012295), Transcription factor TFIID, C-terminal/DNA glycosylase, N-terminal (InterPro:IPR012294); BEST Arabidopsis thaliana protein match is: TATA binding protein 1 (TAIR:AT3G13445.1)	Beta2-adaptin/TBP, C-terminal domain | TATA-box binding protein	NO
AT1G55530	3	1:20730544-20730724	-	AA	0.13426	0.006478	0.12778	1	K1	0.732	RING/U-box superfamily protein	RING/U-box superfamily protein; FUNCTIONS IN: zinc ion binding; EXPRESSED IN: 24 plant structures; EXPRESSED DURING: 15 growth stages; CONTAINS InterPro DOMAIN/s: Zinc finger, RING-type (InterPro:IPR001841), Zinc finger, C3HC4 RING-type (InterPro:IPR018957); BEST Arabidopsis thaliana protein match is: RING/U-box superfamily protein (TAIR:AT3G13430.3)	Zinc finger, RING-type | Zinc finger, RING/FYVE/PHD-type	NO
AT1G55530	3	1:20730725-20730995	-	RI	0.65927	0.11429	0.54498	1	K2	1.189	RING/U-box superfamily protein	RING/U-box superfamily protein; FUNCTIONS IN: zinc ion binding; EXPRESSED IN: 24 plant structures; EXPRESSED DURING: 15 growth stages; CONTAINS InterPro DOMAIN/s: Zinc finger, RING-type (InterPro:IPR001841), Zinc finger, C3HC4 RING-type (InterPro:IPR018957); BEST Arabidopsis thaliana protein match is: RING/U-box superfamily protein (TAIR:AT3G13430.3)	Zinc finger, RING-type | Zinc finger, RING/FYVE/PHD-type	NO
AT1G55590	9	1:20770853-20770942	-	RI	0.68728	0.4721	0.21518	0.918	K3	1.4702	RNI-like superfamily protein	RNI-like superfamily protein; CONTAINS InterPro DOMAIN/s: F-box domain, cyclin-like (InterPro:IPR001810); BEST Arabidopsis thaliana protein match is: F-box/RNI-like superfamily protein (TAIR:AT2G17020.1)	F-box domain	NO
AT1G55675	6	1:20803961-20804302	-	RI	0.5476	0.33125	0.21635	1	K1	1		unknown protein; FUNCTIONS IN: molecular_function unknown; INVOLVED IN: biological_process unknown; LOCATED IN: endomembrane system		NO
AT1G55810	23	1:20862779-20862870	+	RI	0.040849	0.21019	-0.16934	1	K1	0.7756	uridine kinase-like 3	uridine kinase-like 3 (UKL3); FUNCTIONS IN: uracil phosphoribosyltransferase activity, phosphotransferase activity, alcohol group as acceptor, kinase activity, ATP binding; INVOLVED IN: biosynthetic process, metabolic process; LOCATED IN: cellular_component unknown; EXPRESSED IN: 22 plant structures; EXPRESSED DURING: 13 growth stages; CONTAINS InterPro DOMAIN/s: Phosphoribulokinase/uridine kinas…	P-loop containing nucleoside triphosphate hydrolase | Phosphoribosyltransferase-like | Phosphoribulokinase/uridine kinase | Uridine kinase like	NO
AT1G55810	6	1:20860711-20860831	+	AD	0.98376	0.5132	0.47056	1	K3	1.4948	uridine kinase-like 3	uridine kinase-like 3 (UKL3); FUNCTIONS IN: uracil phosphoribosyltransferase activity, phosphotransferase activity, alcohol group as acceptor, kinase activity, ATP binding; INVOLVED IN: biosynthetic process, metabolic process; LOCATED IN: cellular_component unknown; EXPRESSED IN: 22 plant structures; EXPRESSED DURING: 13 growth stages; CONTAINS InterPro DOMAIN/s: Phosphoribulokinase/uridine kinas…	P-loop containing nucleoside triphosphate hydrolase | Phosphoribosyltransferase-like | Phosphoribulokinase/uridine kinase | Uridine kinase like	NO
AT1G55810	7	1:20860832-20861207	+	AD	0.38826	0.13732	0.25094	1	K3	1.5416	uridine kinase-like 3	uridine kinase-like 3 (UKL3); FUNCTIONS IN: uracil phosphoribosyltransferase activity, phosphotransferase activity, alcohol group as acceptor, kinase activity, ATP binding; INVOLVED IN: biosynthetic process, metabolic process; LOCATED IN: cellular_component unknown; EXPRESSED IN: 22 plant structures; EXPRESSED DURING: 13 growth stages; CONTAINS InterPro DOMAIN/s: Phosphoribulokinase/uridine kinas…	P-loop containing nucleoside triphosphate hydrolase | Phosphoribosyltransferase-like | Phosphoribulokinase/uridine kinase | Uridine kinase like	NO
AT1G55810	8	1:20861208-20861270	+	RI	0.36653	0.12971	0.23682	1	K3	1.5395	uridine kinase-like 3	uridine kinase-like 3 (UKL3); FUNCTIONS IN: uracil phosphoribosyltransferase activity, phosphotransferase activity, alcohol group as acceptor, kinase activity, ATP binding; INVOLVED IN: biosynthetic process, metabolic process; LOCATED IN: cellular_component unknown; EXPRESSED IN: 22 plant structures; EXPRESSED DURING: 13 growth stages; CONTAINS InterPro DOMAIN/s: Phosphoribulokinase/uridine kinas…	P-loop containing nucleoside triphosphate hydrolase | Phosphoribosyltransferase-like | Phosphoribulokinase/uridine kinase | Uridine kinase like	NO
AT1G56612	2	1:21214790-21215106	-	RI	0.92056	0.74941	0.17116	0.996	K1	0.9021	other RNA			NO
AT1G57540	5	1:21311413-21311440	-	AD	0.67292	0.84446	-0.17154	0.989	K2	1.1043		unknown protein; FUNCTIONS IN: molecular_function unknown; INVOLVED IN: biological_process unknown; LOCATED IN: cellular_component unknown; EXPRESSED IN: 23 plant structures; EXPRESSED DURING: 13 growth stages		NO
AT1G58180	12	1:21539054-21539168	-	RI	0.1911	0.30356	-0.11246	0.947	K4	1.9533	beta carbonic anhydrase 6	beta carbonic anhydrase 6 (BCA6); FUNCTIONS IN: carbonate dehydratase activity, zinc ion binding; INVOLVED IN: carbon utilization; LOCATED IN: mitochondrion; EXPRESSED IN: 23 plant structures; EXPRESSED DURING: 13 growth stages; CONTAINS InterPro DOMAIN/s: Carbonic anhydrase, prokaryotic-like, conserved site (InterPro:IPR015892), Carbonic anhydrase (InterPro:IPR001765); BEST Arabidopsis thaliana …	Carbonic anhydrase | Carbonic anhydrase, prokaryotic-like, conserved site	NO
AT1G58180	5	1:21539616-21539695	-	RI	0.24917	0.080348	0.16882	0.998	K1	0.8612	beta carbonic anhydrase 6	beta carbonic anhydrase 6 (BCA6); FUNCTIONS IN: carbonate dehydratase activity, zinc ion binding; INVOLVED IN: carbon utilization; LOCATED IN: mitochondrion; EXPRESSED IN: 23 plant structures; EXPRESSED DURING: 13 growth stages; CONTAINS InterPro DOMAIN/s: Carbonic anhydrase, prokaryotic-like, conserved site (InterPro:IPR015892), Carbonic anhydrase (InterPro:IPR001765); BEST Arabidopsis thaliana …	Carbonic anhydrase | Carbonic anhydrase, prokaryotic-like, conserved site	NO
AT1G58350	11	1:21667008-21667179	-	RI	0.85867	0.46376	0.39491	0.981	K3	2.2705	Putative serine esterase family protein	ZW18; INVOLVED IN: biological_process unknown; LOCATED IN: mitochondrion; CONTAINS InterPro DOMAIN/s: Protein of unknown function DUF3657 (InterPro:IPR022122), Protein of unknown function DUF676, hydrolase-like (InterPro:IPR007751); BEST Arabidopsis thaliana protein match is: Putative serine esterase family protein (TAIR:AT1G09980.1)	Alpha/Beta hydrolase fold | Domain of unknown function DUF676, lipase-like | Protein of unknown function DUF3657	NO
AT1G58520	11	1:21732804-21733417	+	RI	0.69536	0.10155	0.59381	1	K1	0.9117	lipases;hydrolases, acting on ester bonds	RXW8; FUNCTIONS IN: hydrolase activity, acting on ester bonds, lipase activity; CONTAINS InterPro DOMAIN/s: Protein of unknown function DUF221 (InterPro:IPR003864); INVOLVED IN: lipid metabolic process; LOCATED IN: endomembrane system; LOCATED IN: endomembrane system, membrane; CONTAINS InterPro DOMAIN/s: Lipase, GDSL, active site (InterPro:IPR008265), Lipase, GDSL (InterPro:IPR001087); CONTAINS …	Domain of unknown function DUF221 | Lipase, GDSL | Lipase, GDSL, active site | SGNH hydrolase-type esterase domain	NO
AT1G59750	22	1:21982194-21982418	+	RI	0.1141	0.32626	-0.21216	1	K1	0.9399	auxin response factor 1	auxin response factor 1 (ARF1); CONTAINS InterPro DOMAIN/s: Aux/IAA-ARF-dimerisation (InterPro:IPR011525), Transcriptional factor B3 (InterPro:IPR003340), AUX/IAA protein (InterPro:IPR003311), Auxin response factor (InterPro:IPR010525); BEST Arabidopsis thaliana protein match is: auxin response factor 11 (TAIR:AT2G46530.1); BEST Arabidopsis thaliana protein match is: auxin response factor 11 (TAI…	AUX/IAA protein | Aux/IAA-ARF-dimerisation | Auxin response factor | B3 DNA binding domain | DNA-binding pseudobarrel domain	NO
AT1G59750	6	1:21979620-21980383	+	RI	0.58566	0.014392	0.57126	1	K2	1.4931	auxin response factor 1	auxin response factor 1 (ARF1); CONTAINS InterPro DOMAIN/s: Aux/IAA-ARF-dimerisation (InterPro:IPR011525), Transcriptional factor B3 (InterPro:IPR003340), AUX/IAA protein (InterPro:IPR003311), Auxin response factor (InterPro:IPR010525); BEST Arabidopsis thaliana protein match is: auxin response factor 11 (TAIR:AT2G46530.1); BEST Arabidopsis thaliana protein match is: auxin response factor 11 (TAI…	AUX/IAA protein | Aux/IAA-ARF-dimerisation | Auxin response factor | B3 DNA binding domain | DNA-binding pseudobarrel domain	NO
AT1G60200	8	1:22204554-22204826	-	RI	0.38152	0.21631	0.16521	0.992	K3	1.8038	splicing factor PWI domain-containing protein / RNA recognition motif (RRM)-containing protein	splicing factor PWI domain-containing protein / RNA recognition motif (RRM)-containing protein; FUNCTIONS IN: nucleotide binding, nucleic acid binding; INVOLVED IN: mRNA processing; LOCATED IN: chloroplast; EXPRESSED IN: 24 plant structures; EXPRESSED DURING: 13 growth stages; CONTAINS InterPro DOMAIN/s: RNA recognition motif, RNP-1 (InterPro:IPR000504), Nucleotide-binding, alpha-beta plait (Inte…	Nucleotide-binding, alpha-beta plait | PWI domain | RNA recognition motif domain	NO
AT1G60270	12	1:22224062-22224128	-	RI	0.47603	0.14961	0.32642	0.965	K2	1.5379	beta glucosidase 6	beta glucosidase 6 (BGLU6); FUNCTIONS IN: cation binding, hydrolase activity, hydrolyzing O-glycosyl compounds, catalytic activity; INVOLVED IN: carbohydrate metabolic process; LOCATED IN: endomembrane system; EXPRESSED IN: 16 plant structures; EXPRESSED DURING: 10 growth stages; CONTAINS InterPro DOMAIN/s: Glycoside hydrolase, family 1 (InterPro:IPR001360), Glycoside hydrolase, family 1, active …	Glycoside hydrolase, catalytic domain | Glycoside hydrolase, family 1 | Glycoside hydrolase, family 1, active site | Glycoside hydrolase, superfamily	NO
AT1G60690	5	1:22351286-22351446	-	RI	0.37487	0.21408	0.1608	0.965	K2	1.5125	NAD(P)-linked oxidoreductase superfamily protein	NAD(P)-linked oxidoreductase superfamily protein; FUNCTIONS IN: oxidoreductase activity, aldo-keto reductase activity; INVOLVED IN: oxidation reduction; LOCATED IN: plasma membrane, chloroplast envelope; EXPRESSED IN: 22 plant structures; EXPRESSED DURING: 13 growth stages; CONTAINS InterPro DOMAIN/s: Aldo/keto reductase (InterPro:IPR001395); BEST Arabidopsis thaliana protein match is: NAD(P)-lin…	Aldo/keto reductase | NADP-dependent oxidoreductase domain	NO
AT1G60850	3	1:22400179-22400284	-	RI	0.10168	0.20422	-0.10254	0.954	K2	1.4237	DNA-directed RNA polymerase family protein	ATRPAC42; FUNCTIONS IN: DNA-directed RNA polymerase activity, protein dimerization activity, DNA binding; INVOLVED IN: transcription; LOCATED IN: nucleolus; EXPRESSED IN: 19 plant structures; EXPRESSED DURING: 10 growth stages; CONTAINS InterPro DOMAIN/s: DNA-directed RNA polymerase, insert domain (InterPro:IPR011262), DNA-directed RNA polymerase, dimerisation (InterPro:IPR011261), DNA-directed R…	DNA-directed RNA polymerase, RBP11-like dimerisation domain | DNA-directed RNA polymerase, RpoA/D/Rpb3-type | DNA-directed RNA polymerase, insert domain	NO
AT1G60900	11	1:22425404-22425573	+	RI	0.32558	0.46181	-0.13623	0.984	K4	2.6028	U2 snRNP auxilliary factor, large subunit, splicing factor	U2 snRNP auxilliary factor, large subunit, splicing factor; FUNCTIONS IN: RNA binding, nucleotide binding, nucleic acid binding; INVOLVED IN: mRNA processing; LOCATED IN: nucleus; CONTAINS InterPro DOMAIN/s: RNA recognition motif, RNP-1 (InterPro:IPR000504), Nucleotide-binding, alpha-beta plait (InterPro:IPR012677), U2 snRNP auxilliary factor, large subunit, splicing factor (InterPro:IPR006529); …	Nucleotide-binding, alpha-beta plait | RNA recognition motif domain | U2 snRNP auxilliary factor, large subunit, splicing factor	NO
AT1G60900	11	1:22425924-22425926	+	AA	0.37781	0.48331	-0.1055	0.941	K4	2.5923	U2 snRNP auxilliary factor, large subunit, splicing factor	U2 snRNP auxilliary factor, large subunit, splicing factor; FUNCTIONS IN: RNA binding, nucleotide binding, nucleic acid binding; INVOLVED IN: mRNA processing; LOCATED IN: nucleus; CONTAINS InterPro DOMAIN/s: RNA recognition motif, RNP-1 (InterPro:IPR000504), Nucleotide-binding, alpha-beta plait (InterPro:IPR012677), U2 snRNP auxilliary factor, large subunit, splicing factor (InterPro:IPR006529); …	Nucleotide-binding, alpha-beta plait | RNA recognition motif domain | U2 snRNP auxilliary factor, large subunit, splicing factor	NO
AT1G60900	13	1:22425675-22425923	+	RI	0.34411	0.46984	-0.12573	0.965	K4	2.6028	U2 snRNP auxilliary factor, large subunit, splicing factor	U2 snRNP auxilliary factor, large subunit, splicing factor; FUNCTIONS IN: RNA binding, nucleotide binding, nucleic acid binding; INVOLVED IN: mRNA processing; LOCATED IN: nucleus; CONTAINS InterPro DOMAIN/s: RNA recognition motif, RNP-1 (InterPro:IPR000504), Nucleotide-binding, alpha-beta plait (InterPro:IPR012677), U2 snRNP auxilliary factor, large subunit, splicing factor (InterPro:IPR006529); …	Nucleotide-binding, alpha-beta plait | RNA recognition motif domain | U2 snRNP auxilliary factor, large subunit, splicing factor	NO
AT1G60900	7	1:22425297-22425403	+	AD	0.49766	0.6964	-0.19875	0.999	K4	2.5923	U2 snRNP auxilliary factor, large subunit, splicing factor	U2 snRNP auxilliary factor, large subunit, splicing factor; FUNCTIONS IN: RNA binding, nucleotide binding, nucleic acid binding; INVOLVED IN: mRNA processing; LOCATED IN: nucleus; CONTAINS InterPro DOMAIN/s: RNA recognition motif, RNP-1 (InterPro:IPR000504), Nucleotide-binding, alpha-beta plait (InterPro:IPR012677), U2 snRNP auxilliary factor, large subunit, splicing factor (InterPro:IPR006529); …	Nucleotide-binding, alpha-beta plait | RNA recognition motif domain | U2 snRNP auxilliary factor, large subunit, splicing factor	NO
AT1G60900	9	1:22425574-22425674	+	CE	0.48824	0.67047	-0.18223	0.996	K4	2.5923	U2 snRNP auxilliary factor, large subunit, splicing factor	U2 snRNP auxilliary factor, large subunit, splicing factor; FUNCTIONS IN: RNA binding, nucleotide binding, nucleic acid binding; INVOLVED IN: mRNA processing; LOCATED IN: nucleus; CONTAINS InterPro DOMAIN/s: RNA recognition motif, RNP-1 (InterPro:IPR000504), Nucleotide-binding, alpha-beta plait (InterPro:IPR012677), U2 snRNP auxilliary factor, large subunit, splicing factor (InterPro:IPR006529); …	Nucleotide-binding, alpha-beta plait | RNA recognition motif domain | U2 snRNP auxilliary factor, large subunit, splicing factor	NO
AT1G61150	9	1:22542863-22542957	+	AA	0.59125	0.7392	-0.14796	0.941	K4	1.7549	LisH and RanBPM domains containing protein	LisH and RanBPM domains containing protein; FUNCTIONS IN: molecular_function unknown; INVOLVED IN: biological_process unknown; LOCATED IN: cellular_component unknown; EXPRESSED IN: 23 plant structures; EXPRESSED DURING: 13 growth stages; CONTAINS InterPro DOMAIN/s: LisH dimerisation motif, subgroup (InterPro:IPR013720), Ran binding protein, CRA domain (InterPro:IPR019589), CTLH, C-terminal LisH m…	CRA domain | CTLH, C-terminal LisH motif | CTLH/CRA C-terminal to LisH motif domain | LisH dimerisation motif | LisH dimerisation motif, subgroup	NO
AT1G61240	12	1:22582082-22582114	+	CE	0.37093	0.17195	0.19898	0.939	K4	2.4314	Protein of unknown function (DUF707)	Protein of unknown function (DUF707); FUNCTIONS IN: molecular_function unknown; INVOLVED IN: biological_process unknown; LOCATED IN: cellular_component unknown; EXPRESSED IN: 19 plant structures; EXPRESSED DURING: 11 growth stages; CONTAINS InterPro DOMAIN/s: Protein of unknown function DUF707 (InterPro:IPR007877); BEST Arabidopsis thaliana protein match is: Protein of unknown function (DUF707) (…	Protein of unknown function DUF707	NO
AT1G61240	13	1:22582115-22582128	+	AD	0.34002	0.16466	0.17536	0.94	K4	2.4314	Protein of unknown function (DUF707)	Protein of unknown function (DUF707); FUNCTIONS IN: molecular_function unknown; INVOLVED IN: biological_process unknown; LOCATED IN: cellular_component unknown; EXPRESSED IN: 19 plant structures; EXPRESSED DURING: 11 growth stages; CONTAINS InterPro DOMAIN/s: Protein of unknown function DUF707 (InterPro:IPR007877); BEST Arabidopsis thaliana protein match is: Protein of unknown function (DUF707) (…	Protein of unknown function DUF707	NO
AT1G61580	3	1:22722424-22723113	-	RI	0.20177	0.066682	0.13509	0.939	K2	0.7367	R-protein L3 B	R-protein L3 B (RPL3B); FUNCTIONS IN: structural constituent of ribosome; INVOLVED IN: translation; LOCATED IN: ribosome, cytosolic large ribosomal subunit, membrane; EXPRESSED IN: 23 plant structures; EXPRESSED DURING: 13 growth stages; CONTAINS InterPro DOMAIN/s: Ribosomal protein L3 (InterPro:IPR000597), Ribosomal protein L3, conserved site (InterPro:IPR019926), Translation elongation/initiati…	Ribosomal protein L3 | Ribosomal protein L3, conserved site | Translation protein, beta-barrel domain	NO
AT1G62035	5	1:22929840-22930046	-	RI	0.029908	0.19756	-0.16765	0.976	K1	0.8315	MIR171C; miRNA			NO
AT1G62430	3	1:23108995-23109271	-	RI	0.42298	0.011271	0.4117	1	K1	0.9909	CDP-diacylglycerol synthase 1	CDP-diacylglycerol synthase 1 (CDS1); CONTAINS InterPro DOMAIN/s: Phosphatidate cytidylyltransferase (InterPro:IPR000374), Phosphatidate cytidylyltransferase, eukaryota (InterPro:IPR016720); BEST Arabidopsis thaliana protein match is: cytidinediphosphate diacylglycerol synthase 2 (TAIR:AT4G22340.1)	Phosphatidate cytidylyltransferase | Phosphatidate cytidylyltransferase, eukaryota	NO
AT1G62480	2	1:23128814-23129104	+	RI	0.12356	0.012531	0.11103	1	K1	0.6683	Vacuolar calcium-binding protein-related	Vacuolar calcium-binding protein-related; INVOLVED IN: response to cadmium ion, response to salt stress; LOCATED IN: cellular_component unknown; EXPRESSED IN: 23 plant structures; EXPRESSED DURING: 13 growth stages		NO
AT1G62600	3	1:23180104-23180181	+	RI	0.18772	0.087381	0.10033	0.94	K3	1.8055	Flavin-binding monooxygenase family protein	Flavin-binding monooxygenase family protein; FUNCTIONS IN: NADP or NADPH binding, monooxygenase activity, FAD binding, flavin-containing monooxygenase activity; INVOLVED IN: oxidation reduction; LOCATED IN: vacuole; CONTAINS InterPro DOMAIN/s: Flavin-containing monooxygenase FMO (InterPro:IPR000960), Flavin-containing monooxygenase-like (InterPro:IPR020946); BEST Arabidopsis thaliana protein matc…	Flavin monooxygenase FMO | Flavin monooxygenase-like	NO
AT1G62640	3	1:23192303-23192387	+	RI	0.41823	0.69195	-0.27372	0.993	K1	0.9969	3-ketoacyl-acyl carrier protein synthase III	3-ketoacyl-acyl carrier protein synthase III (KAS III); FUNCTIONS IN: transferase activity, transferring acyl groups other than amino-acyl groups, 3-oxoacyl-[acyl-carrier-protein] synthase activity, catalytic activity; INVOLVED IN: lipid biosynthetic process, metabolic process, fatty acid biosynthetic process; LOCATED IN: chloroplast; EXPRESSED IN: 22 plant structures; EXPRESSED DURING: 13 growth…	3-Oxoacyl-[acyl-carrier-protein (ACP)] synthase III | 3-Oxoacyl-[acyl-carrier-protein (ACP)] synthase III C-terminal | 3-oxoacyl-[acyl-carrier-protein] synthase 3 | Thiolase-like | Thiolase-like, subgroup	NO
AT1G62915	9	1:23303459-23303691	-	RI	0.60595	0.89433	-0.28838	0.917	K2	1.3637	hypothetical protein;(source:Araport11)			NO
AT1G62975	3	1:23329219-23329750	+	RI	0.28881	0.11295	0.17586	0.974	K1	0.9293	basic helix-loop-helix (bHLH) DNA-binding superfamily protein	basic helix-loop-helix (bHLH) DNA-binding superfamily protein; FUNCTIONS IN: DNA binding, sequence-specific DNA binding transcription factor activity; INVOLVED IN: regulation of transcription; LOCATED IN: nucleus; CONTAINS InterPro DOMAIN/s: Helix-loop-helix DNA-binding domain (InterPro:IPR001092), Helix-loop-helix DNA-binding (InterPro:IPR011598); BEST Arabidopsis thaliana protein match is: basi…	Achaete-scute transcription factor-related | Myc-type, basic helix-loop-helix (bHLH) domain	NO
AT1G63010	5	1:23352399-23352498	-	RI	0.26258	0.12353	0.13905	0.947	K1	0.8928	Major Facilitator Superfamily with SPX (SYG1/Pho81/XPR1) domain-containing protein	Major Facilitator Superfamily with SPX (SYG1/Pho81/XPR1) domain-containing protein; INVOLVED IN: transmembrane transport; LOCATED IN: vacuolar membrane; LOCATED IN: vacuolar membrane, plant-type vacuole; EXPRESSED IN: 24 plant structures; EXPRESSED IN: 25 plant structures; EXPRESSED DURING: 13 growth stages; CONTAINS InterPro DOMAIN/s: SPX, N-terminal (InterPro:IPR004331), Major facilitator super…	Major facilitator superfamily | Major facilitator superfamily domain, general substrate transporter | SPX, N-terminal	NO
AT1G63650	5	1:23599651-23599803	+	RI	0.88408	0.59915	0.28493	0.905	K2	0.9544	basic helix-loop-helix (bHLH) DNA-binding superfamily protein	ENHANCER OF GLABRA 3 (EGL3); FUNCTIONS IN: DNA binding, sequence-specific DNA binding transcription factor activity; INVOLVED IN: epidermal cell fate specification, regulation of transcription; LOCATED IN: nucleus; EXPRESSED IN: 14 plant structures; EXPRESSED DURING: 7 growth stages; CONTAINS InterPro DOMAIN/s: Helix-loop-helix DNA-binding domain (InterPro:IPR001092), Helix-loop-helix DNA-binding…	Myc-type, basic helix-loop-helix (bHLH) domain | Transcription factor MYC/MYB N-terminal	NO
AT1G63670	13	1:23610074-23610219	-	RI	0.44484	0.066438	0.3784	1	K2	1.0823	Protein of unknown function (DUF3741)	FUNCTIONS IN: molecular_function unknown; INVOLVED IN: biological_process unknown; LOCATED IN: cellular_component unknown; EXPRESSED IN: 22 plant structures; EXPRESSED DURING: 13 growth stages; CONTAINS InterPro DOMAIN/s: Protein of unknown function DUF3741 (InterPro:IPR022212); BEST Arabidopsis thaliana protein match is: Phosphatidylinositol N-acetyglucosaminlytransferase subunit P-related (TAIR…	Domain of unknown function DUF4378 | Protein of unknown function DUF3741	NO
AT1G63770	10	1:23663864-23664165	-	RI	0.12127	0.0023895	0.11888	1	K2	0.9578	Peptidase M1 family protein	Peptidase M1 family protein; FUNCTIONS IN: metallopeptidase activity, zinc ion binding; INVOLVED IN: proteolysis; INVOLVED IN: response to cadmium ion, proteolysis; EXPRESSED IN: 24 plant structures; LOCATED IN: apoplast, chloroplast, plasma membrane; LOCATED IN: in 6 components; EXPRESSED DURING: 15 growth stages; EXPRESSED IN: 25 plant structures; EXPRESSED IN: 26 plant structures; CONTAINS Int…	Peptidase M1, alanine aminopeptidase/leukotriene A4 hydrolase | Peptidase M1, alanyl aminopeptidase | Peptidase M1, alanyl aminopeptidase, C-terminal | Peptidase M1, membrane alanine aminopeptidase, N-terminal	NO
AT1G63880	7	1:23715316-23715574	-	RI	0.2134	0.094914	0.11849	0.944	K1	0.7642	Disease resistance protein (TIR-NBS-LRR class) family	Disease resistance protein (TIR-NBS-LRR class) family; FUNCTIONS IN: transmembrane receptor activity, nucleoside-triphosphatase activity, nucleotide binding, ATP binding; INVOLVED IN: defense response to fungus, defense response; LOCATED IN: intrinsic to membrane; EXPRESSED IN: 21 plant structures; EXPRESSED DURING: 13 growth stages; CONTAINS InterPro DOMAIN/s: ATPase, AAA+ type, core (InterPro:I…	AAA+ ATPase domain | Leucine-rich repeat | Leucine-rich repeat 3 | NB-ARC | P-loop containing nucleoside triphosphate hydrolase | Toll/interleukin-1 receptor homology (TIR) domain	NO
AT1G64330	3	1:23870990-23872105	+	RI	0.78175	0.080106	0.70164	1	K1	0.8631	myosin heavy chain-related	myosin heavy chain-related; FUNCTIONS IN: molecular_function unknown; INVOLVED IN: biological_process unknown; LOCATED IN: plasma membrane, vacuole; EXPRESSED IN: 23 plant structures; EXPRESSED DURING: 13 growth stages; BEST Arabidopsis thaliana protein match is: COP1-interactive protein 1 (TAIR:AT5G41790.1)		NO
AT1G64430	6	1:23934691-23934712	+	AA	0.66411	0.55568	0.10842	0.984	K2	1.0375	Pentatricopeptide repeat (PPR) superfamily protein	Pentatricopeptide repeat (PPR) superfamily protein; CONTAINS InterPro DOMAIN/s: Pentatricopeptide repeat (InterPro:IPR002885)	Pentatricopeptide repeat	NO
AT1G64840	6	1:24093790-24093977	+	RI	0.77257	0.19805	0.57452	0.998	K2	1.3902	Protein of unknown function (DUF295)	CONTAINS InterPro DOMAIN/s: F-box domain, cyclin-like (InterPro:IPR001810), Protein of unknown function DUF295 (InterPro:IPR005174); BEST Arabidopsis thaliana protein match is: Protein of unknown function (DUF295) (TAIR:AT2G24250.2)	F-box domain | Protein of unknown function DUF295	NO
AT1G66330	3	1:24732266-24732377	-	AD	0.013098	0.16501	-0.15192	0.997	K1	0.8183	senescence-associated family protein	senescence-associated family protein	Armadillo-like helical	NO
AT1G66330	4	1:24732155-24732265	-	RI	0.19816	0.067365	0.13079	0.932	K2	1.0023	senescence-associated family protein	senescence-associated family protein	Armadillo-like helical	NO
AT1G66520	7	1:24817771-24817777	-	AD	0.81508	0.92394	-0.10886	0.935	K1	0.7141	formyltransferase, putative	pigment defective 194 (pde194); FUNCTIONS IN: hydroxymethyl-, formyl- and related transferase activity, formyltetrahydrofolate deformylase activity, catalytic activity; INVOLVED IN: purine ribonucleotide biosynthetic process, biosynthetic process; EXPRESSED IN: 21 plant structures; EXPRESSED DURING: 13 growth stages; CONTAINS InterPro DOMAIN/s: Formyl transferase, C-terminal (InterPro:IPR005793),…	Formyl transferase, C-terminal | Formyl transferase, C-terminal-like | Formyl transferase, N-terminal | Methionine tRNA Formyltransferase-like | Methionyl-tRNA formyltransferase	NO
AT1G66730	17	1:24890220-24890351	+	AA	0.41451	0.55341	-0.1389	0.918	K4	3.6644	DNA LIGASE 6	DNA LIGASE 6 (LIG6); FUNCTIONS IN: DNA binding, DNA ligase (ATP) activity, ATP binding; INVOLVED IN: DNA repair, seed germination, DNA recombination, DNA replication; LOCATED IN: chloroplast; EXPRESSED IN: 16 plant structures; EXPRESSED DURING: 9 growth stages; CONTAINS InterPro DOMAIN/s: Nucleic acid-binding, OB-fold (InterPro:IPR012340), DNA ligase, N-terminal (InterPro:IPR012308), DNA repair m…	Beta-lactamase-like | DNA ligase, ATP-dependent | DNA ligase, ATP-dependent, C-terminal | DNA ligase, ATP-dependent, N-terminal | DNA ligase, ATP-dependent, central | DNA ligase, ATP-dependent, conserved site | DNA repair metallo-beta-lactamase | Nucleic acid-binding, OB-fold	NO
AT1G66783	5	1:24912987-24913387	-	RI	0.47142	0.09664	0.37478	1	K2	1.0845	MIR157A; miRNA			NO
AT1G66840	2	1:24936141-24936218	-	RI	0.20963	0.41447	-0.20484	0.931	K2	1.4621	Plant protein of unknown function (DUF827)	Plant protein of unknown function (DUF827); CONTAINS InterPro DOMAIN/s: Protein of unknown function DUF827, plant (InterPro:IPR008545); BEST Arabidopsis thaliana protein match is: Plant protein of unknown function (DUF827) (TAIR:AT5G38150.1)	WEB family	NO
AT1G66910	2	1:24962904-24963130	-	RI	0.75781	0.48767	0.27015	0.956	K1	1	Protein kinase superfamily protein	Protein kinase superfamily protein; FUNCTIONS IN: kinase activity; INVOLVED IN: protein amino acid phosphorylation; LOCATED IN: endomembrane system; CONTAINS InterPro DOMAIN/s: Protein kinase, ATP binding site (InterPro:IPR017441), Serine/threonine-protein kinase domain (InterPro:IPR002290), Serine-threonine/tyrosine-protein kinase (InterPro:IPR001245), Serine/threonine-protein kinase, active sit…	Concanavalin A-like lectin/glucanase, subgroup | Protein kinase domain | Protein kinase, ATP binding site | Protein kinase-like domain | Serine-threonine/tyrosine-protein kinase catalytic domain | Serine/threonine-protein kinase, active site	NO
AT1G67190	3	1:25132699-25132935	+	AD	0.32804	0.12812	0.19992	0.94	K2	1.6844	F-box/RNI-like superfamily protein	F-box/RNI-like superfamily protein; FUNCTIONS IN: molecular_function unknown; INVOLVED IN: biological_process unknown; LOCATED IN: cellular_component unknown; CONTAINS InterPro DOMAIN/s: F-box domain, cyclin-like (InterPro:IPR001810), F-box domain, Skp2-like (InterPro:IPR022364); BEST Arabidopsis thaliana protein match is: F-box/RNI-like superfamily protein (TAIR:AT1G10780.1)	F-box domain | Leucine rich repeat 4	NO
AT1G67195	4	1:25137844-25137893	-	AD	0.35614	0.24971	0.10643	0.908	K2	0.9876	MIR414 (MICRORNA 414)	MICRORNA 414 (MIR414); FUNCTIONS IN: molecular_function unknown; INVOLVED IN: biological_process unknown; LOCATED IN: cellular_component unknown		NO
AT1G67195	5	1:25137663-25137843	-	RI	0.3528	0.2189	0.1339	0.932	K2	0.9876	MIR414 (MICRORNA 414)	MICRORNA 414 (MIR414); FUNCTIONS IN: molecular_function unknown; INVOLVED IN: biological_process unknown; LOCATED IN: cellular_component unknown		NO
AT1G67300	25	1:25194779-25194892	-	RI	0.26315	0.42173	-0.15858	0.998	K2	1.7462	Major facilitator superfamily protein	Major facilitator superfamily protein; FUNCTIONS IN: carbohydrate transmembrane transporter activity, sugar:hydrogen symporter activity; INVOLVED IN: transport, transmembrane transport; LOCATED IN: integral to membrane, membrane; EXPRESSED IN: 22 plant structures; EXPRESSED DURING: 13 growth stages; CONTAINS InterPro DOMAIN/s: Sugar transporter, conserved site (InterPro:IPR005829), Major facilita…	General substrate transporter | Major facilitator superfamily domain | Major facilitator superfamily domain, general substrate transporter | Sugar transporter, conserved site | Sugar/inositol transporter	NO
AT1G67300	7	1:25196798-25196934	-	RI	0.024601	0.13785	-0.11325	1	K1	0.6212	Major facilitator superfamily protein	Major facilitator superfamily protein; FUNCTIONS IN: carbohydrate transmembrane transporter activity, sugar:hydrogen symporter activity; INVOLVED IN: transport, transmembrane transport; LOCATED IN: integral to membrane, membrane; EXPRESSED IN: 22 plant structures; EXPRESSED DURING: 13 growth stages; CONTAINS InterPro DOMAIN/s: Sugar transporter, conserved site (InterPro:IPR005829), Major facilita…	General substrate transporter | Major facilitator superfamily domain | Major facilitator superfamily domain, general substrate transporter | Sugar transporter, conserved site | Sugar/inositol transporter	NO
AT1G67420	23	1:25258404-25258406	+	AD	0.78139	0.94277	-0.16138	0.975	K2	1.0231	Zn-dependent exopeptidases superfamily protein	Zn-dependent exopeptidases superfamily protein; FUNCTIONS IN: peptidase activity; INVOLVED IN: proteolysis; EXPRESSED IN: 18 plant structures; LOCATED IN: endomembrane system; EXPRESSED DURING: 7 growth stages; CONTAINS InterPro DOMAIN/s: Peptidase M28 (InterPro:IPR007484); BEST Arabidopsis thaliana protein match is: Zn-dependent exopeptidases superfamily protein (TAIR:AT5G20660.1)	Peptidase M28	NO
AT1G67480	4	1:25276346-25276463	+	AD	0.15085	0.30634	-0.1555	0.996	K1	0.9346	Galactose oxidase/kelch repeat superfamily protein	Galactose oxidase/kelch repeat superfamily protein; FUNCTIONS IN: molecular_function unknown; INVOLVED IN: biological_process unknown; LOCATED IN: cellular_component unknown; EXPRESSED IN: 23 plant structures; EXPRESSED DURING: 15 growth stages; CONTAINS InterPro DOMAIN/s: F-box domain, cyclin-like (InterPro:IPR001810), Galactose oxidase/kelch, beta-propeller (InterPro:IPR011043), Kelch repeat ty…	F-box domain | Galactose oxidase, beta-propeller | Kelch repeat type 1	NO
AT1G67480	7	1:25276615-25276832	+	RI	0.1488	0.022952	0.12585	1	K2	1.1917	Galactose oxidase/kelch repeat superfamily protein	Galactose oxidase/kelch repeat superfamily protein; FUNCTIONS IN: molecular_function unknown; INVOLVED IN: biological_process unknown; LOCATED IN: cellular_component unknown; EXPRESSED IN: 23 plant structures; EXPRESSED DURING: 15 growth stages; CONTAINS InterPro DOMAIN/s: F-box domain, cyclin-like (InterPro:IPR001810), Galactose oxidase/kelch, beta-propeller (InterPro:IPR011043), Kelch repeat ty…	F-box domain | Galactose oxidase, beta-propeller | Kelch repeat type 1	NO
AT1G67720	9	1:25386567-25386871	+	RI	0.48307	0.031887	0.45118	1	K2	1.1253	Leucine-rich repeat protein kinase family protein	Leucine-rich repeat protein kinase family protein; FUNCTIONS IN: protein kinase activity, kinase activity; INVOLVED IN: protein amino acid phosphorylation; LOCATED IN: endomembrane system; EXPRESSED IN: 21 plant structures; EXPRESSED DURING: 13 growth stages; CONTAINS InterPro DOMAIN/s: Protein kinase, ATP binding site (InterPro:IPR017441), Protein kinase, catalytic domain (InterPro:IPR000719), S…	Concanavalin A-like lectin/glucanase, subgroup | Malectin-like carbohydrate-binding domain | Protein kinase domain | Protein kinase, ATP binding site | Protein kinase-like domain | Serine-threonine/tyrosine-protein kinase catalytic domain | Serine/threonine-protein kinase, active site	NO
AT1G67790	12	1:25418001-25418097	-	RI	0.52058	0.14131	0.37927	0.997	K1	1		unknown protein; BEST Arabidopsis thaliana protein match is: unknown protein (TAIR:AT3G01680.1)	Sieve element occlusion, C-terminal | Sieve element occlusion, N-terminal	NO
AT1G67800	7	1:25423288-25423430	-	RI	0.92985	0.5051	0.42475	1	K2	1.7567	Copine (Calcium-dependent phospholipid-binding protein) family	Copine (Calcium-dependent phospholipid-binding protein) family; FUNCTIONS IN: zinc ion binding; INVOLVED IN: N-terminal protein myristoylation; EXPRESSED IN: 19 plant structures; EXPRESSED DURING: 10 growth stages; CONTAINS InterPro DOMAIN/s: Zinc finger, RING-type (InterPro:IPR001841), Copine (InterPro:IPR010734), von Willebrand factor, type A (InterPro:IPR002035); BEST Arabidopsis thaliana prot…	Copine | Zinc finger, RING-type | Zinc finger, RING/FYVE/PHD-type | von Willebrand factor, type A	NO
AT1G67800	8	1:25423280-25423287	-	AA	0.93393	0.6161	0.31783	0.995	K2	1.7567	Copine (Calcium-dependent phospholipid-binding protein) family	Copine (Calcium-dependent phospholipid-binding protein) family; FUNCTIONS IN: zinc ion binding; INVOLVED IN: N-terminal protein myristoylation; EXPRESSED IN: 19 plant structures; EXPRESSED DURING: 10 growth stages; CONTAINS InterPro DOMAIN/s: Zinc finger, RING-type (InterPro:IPR001841), Copine (InterPro:IPR010734), von Willebrand factor, type A (InterPro:IPR002035); BEST Arabidopsis thaliana prot…	Copine | Zinc finger, RING-type | Zinc finger, RING/FYVE/PHD-type | von Willebrand factor, type A	NO
AT1G67850	9	1:25438293-25438865	+	RI	0.20341	0.064984	0.13842	0.93	K3	1.9448	Protein of unknown function (DUF707)	Protein of unknown function (DUF707); CONTAINS InterPro DOMAIN/s: Protein of unknown function DUF707 (InterPro:IPR007877); BEST Arabidopsis thaliana protein match is: Protein of unknown function (DUF707) (TAIR:AT1G13000.2)	Protein of unknown function DUF707	NO
AT1G67900	10	1:25467376-25467421	+	CE	0.4155	0.043249	0.37225	1	K3	1.8882	Phototropic-responsive NPH3 family protein	Phototropic-responsive NPH3 family protein; FUNCTIONS IN: signal transducer activity; INVOLVED IN: response to light stimulus; LOCATED IN: cellular_component unknown; CONTAINS InterPro DOMAIN/s: NPH3 (InterPro:IPR004249), BTB/POZ fold (InterPro:IPR011333); EXPRESSED IN: cultured cell; BEST Arabidopsis thaliana protein match is: Phototropic-responsive NPH3 family protein (TAIR:AT3G26490.1)	BTB/POZ fold | NPH3 domain	NO
AT1G67900	8	1:25467052-25467159	+	CE	0.96211	0.4472	0.51492	1	K4	1.8882	Phototropic-responsive NPH3 family protein	Phototropic-responsive NPH3 family protein; FUNCTIONS IN: signal transducer activity; INVOLVED IN: response to light stimulus; LOCATED IN: cellular_component unknown; CONTAINS InterPro DOMAIN/s: NPH3 (InterPro:IPR004249), BTB/POZ fold (InterPro:IPR011333); EXPRESSED IN: cultured cell; BEST Arabidopsis thaliana protein match is: Phototropic-responsive NPH3 family protein (TAIR:AT3G26490.1)	BTB/POZ fold | NPH3 domain	NO
AT1G67900	9	1:25467160-25467375	+	RI	0.33695	0.03758	0.29937	0.998	K4	1.8857	Phototropic-responsive NPH3 family protein	Phototropic-responsive NPH3 family protein; FUNCTIONS IN: signal transducer activity; INVOLVED IN: response to light stimulus; LOCATED IN: cellular_component unknown; CONTAINS InterPro DOMAIN/s: NPH3 (InterPro:IPR004249), BTB/POZ fold (InterPro:IPR011333); EXPRESSED IN: cultured cell; BEST Arabidopsis thaliana protein match is: Phototropic-responsive NPH3 family protein (TAIR:AT3G26490.1)	BTB/POZ fold | NPH3 domain	NO
AT1G68140	6	1:25540431-25540793	-	RI	0.47538	0.088494	0.38688	1	K2	1.3615	Protein of unknown function (DUF1644)	Protein of unknown function (DUF1644); FUNCTIONS IN: molecular_function unknown; INVOLVED IN: biological_process unknown; EXPRESSED IN: 23 plant structures; EXPRESSED DURING: 13 growth stages; CONTAINS InterPro DOMAIN/s: Protein of unknown function DUF1644 (InterPro:IPR012866); BEST Arabidopsis thaliana protein match is: Protein of unknown function (DUF1644) (TAIR:AT4G08460.3)	Protein of unknown function DUF1644	NO
AT1G68190	7	1:25559292-25559368	+	RI	0.48691	0.13294	0.35397	1	K3	1.6597	B-box zinc finger family protein	B-box zinc finger family protein; FUNCTIONS IN: sequence-specific DNA binding transcription factor activity, zinc ion binding; INVOLVED IN: regulation of transcription; LOCATED IN: endomembrane system, intracellular; EXPRESSED IN: 14 plant structures; EXPRESSED DURING: 8 growth stages; CONTAINS InterPro DOMAIN/s: Zinc finger, B-box (InterPro:IPR000315); BEST Arabidopsis thaliana protein match is:…	Zinc finger, B-box	NO
AT1G68310	4	1:25599670-25599800	+	RI	0.67015	0.029056	0.64109	1	K2	1.2005	Protein of unknown function (DUF59)	FUNCTIONS IN: vacuolar sorting signal binding; Protein of unknown function (DUF59); INVOLVED IN: biological_process unknown; LOCATED IN: cellular_component unknown; CONTAINS InterPro DOMAIN/s: Protein of unknown function DUF59 (InterPro:IPR002744); BEST Arabidopsis thaliana protein match is: Protein of unknown function (DUF59) (TAIR:AT3G50845.1)	Domain of unknown function DUF59	NO
AT1G68410	5	1:25652518-25652742	-	RI	0.92881	0.4914	0.43741	1	K2	1.4821	Protein phosphatase 2C family protein	Protein phosphatase 2C family protein; FUNCTIONS IN: protein serine/threonine phosphatase activity, catalytic activity; INVOLVED IN: biological_process unknown; LOCATED IN: cellular_component unknown; EXPRESSED IN: 22 plant structures; EXPRESSED DURING: 12 growth stages; CONTAINS InterPro DOMAIN/s: Protein phosphatase 2C-related (InterPro:IPR001932), Protein phosphatase 2C (InterPro:IPR015655), P…	Protein phosphatase 2C | Protein phosphatase 2C (PP2C)-like domain	NO
AT1G68410	6	1:25652514-25652517	-	AA	0.98837	0.8482	0.14016	1	K2	1.4868	Protein phosphatase 2C family protein	Protein phosphatase 2C family protein; FUNCTIONS IN: protein serine/threonine phosphatase activity, catalytic activity; INVOLVED IN: biological_process unknown; LOCATED IN: cellular_component unknown; EXPRESSED IN: 22 plant structures; EXPRESSED DURING: 12 growth stages; CONTAINS InterPro DOMAIN/s: Protein phosphatase 2C-related (InterPro:IPR001932), Protein phosphatase 2C (InterPro:IPR015655), P…	Protein phosphatase 2C | Protein phosphatase 2C (PP2C)-like domain	NO
AT1G68890	15	1:25899959-25899971	+	AA	0.69985	0.46947	0.23038	0.981	K7	3.3485	magnesium ion binding;thiamin pyrophosphate binding;hydro-lyases;catalytics;2-succinyl-5-enolpyruvyl-6-hydroxy-3-cyclohexene-1-carboxylic-acid synthases	magnesium ion binding;thiamin pyrophosphate binding;hydro-lyases;catalytics;2-succinyl-5-enolpyruvyl-6-hydroxy-3-cyclohexene-1-carboxylic-acid synthases; FUNCTIONS IN: 2-succinyl-5-enolpyruvyl-6-hydroxy-3-cyclohexene-1-carboxylic-acid synthase activity, hydro-lyase activity, magnesium ion binding, thiamin pyrophosphate binding, catalytic activity; INVOLVED IN: phylloquinone biosynthetic process, …	Alpha/Beta hydrolase fold | DHS-like NAD/FAD-binding domain | Enolase C-terminal domain-like | Enolase N-terminal domain-like | Mandelate racemase/muconate lactonizing enzyme, C-terminal | Mandelate racemase/muconate lactonizing enzyme, conserved site | Menaquinone biosynthesis protein MenD | O-succinylbenzoic acid (OSB) synthetase | Thiamin diphosphate-binding fold | Thiamine pyrophosphate enzym…	NO
AT1G68910	13	1:25908565-25908568	-	AD	0.68321	0.8059	-0.12269	0.942	K1	0.9446	WPP domain-interacting protein 2	WPP domain-interacting protein 2 (WIT2); FUNCTIONS IN: molecular_function unknown; INVOLVED IN: biological_process unknown; LOCATED IN: cellular_component unknown; EXPRESSED IN: 22 plant structures; EXPRESSED DURING: 13 growth stages; BEST Arabidopsis thaliana protein match is: WPP domain-interacting protein 1 (TAIR:AT5G11390.1)		NO
AT1G68920	8	1:25915095-25915210	+	RI	0.95798	0.73788	0.2201	1	K2	0.878	basic helix-loop-helix (bHLH) DNA-binding superfamily protein	basic helix-loop-helix (bHLH) DNA-binding superfamily protein; FUNCTIONS IN: sequence-specific DNA binding transcription factor activity; INVOLVED IN: regulation of transcription; LOCATED IN: nucleus; EXPRESSED IN: 22 plant structures; EXPRESSED DURING: 13 growth stages; CONTAINS InterPro DOMAIN/s: Helix-loop-helix DNA-binding domain (InterPro:IPR001092), Helix-loop-helix DNA-binding (InterPro:IP…	Myc-type, basic helix-loop-helix (bHLH) domain	NO
AT1G69170	3	1:26005281-26005449	+	RI	0.38056	0.090218	0.29035	0.986	K1	0.9774	Squamosa promoter-binding protein-like (SBP domain) transcription factor family protein	Squamosa promoter-binding protein-like (SBP domain) transcription factor family protein; FUNCTIONS IN: DNA binding, sequence-specific DNA binding transcription factor activity; INVOLVED IN: regulation of transcription; LOCATED IN: nucleus; EXPRESSED IN: 14 plant structures; EXPRESSED DURING: 6 growth stages; CONTAINS InterPro DOMAIN/s: Transcription factor, SBP-box (InterPro:IPR004333); BEST Arab…	Transcription factor, SBP-box	NO
AT1G69310	10	1:26056713-26056907	-	RI	0.25549	0.10742	0.14807	0.981	K2	0.8649	WRKY DNA-binding protein 57	WRKY DNA-binding protein 57 (WRKY57); CONTAINS InterPro DOMAIN/s: DNA-binding WRKY (InterPro:IPR003657); BEST Arabidopsis thaliana protein match is: WRKY DNA-binding protein 48 (TAIR:AT5G49520.1)	DNA-binding WRKY	NO
AT1G69935	6	1:26342835-26342914	-	RI	0.18946	0.43416	-0.24471	1	K2	1.5623	short hypocotyl in white light1	SHORT HYPOCOTYL IN WHITE LIGHT1 (SHW1); BEST Arabidopsis thaliana protein match is: unknown protein (TAIR:AT4G33780.1)		NO
AT1G69935	7	1:26342827-26342834	-	AA	0.53256	0.70054	-0.16798	0.958	K2	1.5623	short hypocotyl in white light1	SHORT HYPOCOTYL IN WHITE LIGHT1 (SHW1); BEST Arabidopsis thaliana protein match is: unknown protein (TAIR:AT4G33780.1)		NO
AT1G70100	9	1:26403599-26403627	+	CE	0.42603	0.0916	0.33443	1	K2	1.3156		unknown protein; FUNCTIONS IN: molecular_function unknown; INVOLVED IN: biological_process unknown; LOCATED IN: cellular_component unknown; EXPRESSED IN: 22 plant structures; EXPRESSED DURING: 13 growth stages; BEST Arabidopsis thaliana protein match is: unknown protein (TAIR:AT1G24160.2)		NO
AT1G70180	8	1:26426587-26426613	+	RI	0.32714	0.087318	0.23982	1	K1	0.9311	Sterile alpha motif (SAM) domain-containing protein	Sterile alpha motif (SAM) domain-containing protein; CONTAINS InterPro DOMAIN/s: Sterile alpha motif homology (InterPro:IPR010993), Sterile alpha motif, type 1 (InterPro:IPR021129); CONTAINS InterPro DOMAIN/s: Sterile alpha motif-type (InterPro:IPR013761), Sterile alpha motif (InterPro:IPR001660), Sterile alpha motif homology (InterPro:IPR010993), Sterile alpha motif, type 1 (InterPro:IPR021129);…	Sterile alpha motif domain | Sterile alpha motif, type 1 | Sterile alpha motif/pointed domain	NO
AT1G70290	4	1:26474119-26474586	-	RI	0.45007	0.039991	0.41007	1	K1	1	trehalose-6-phosphatase synthase S8	trehalose-6-phosphatase synthase S8 (TPS8); FUNCTIONS IN: transferase activity, transferring glycosyl groups; INVOLVED IN: trehalose biosynthetic process, metabolic process; EXPRESSED IN: 26 plant structures; EXPRESSED DURING: 13 growth stages; CONTAINS InterPro DOMAIN/s: HAD-superfamily hydrolase, subfamily IIB (InterPro:IPR006379), Glycosyl transferase, family 20 (InterPro:IPR001830), Trehalose…	Glycosyl transferase, family 20 | HAD-like domain | HAD-superfamily hydrolase, subfamily IIB | Trehalose-phosphatase	NO
AT1G70410	7	1:26536604-26537403	-	AD	0.28654	0.43691	-0.15037	0.996	K2	1.1708	beta carbonic anhydrase 4	beta carbonic anhydrase 4 (BCA4); FUNCTIONS IN: carbonate dehydratase activity, zinc ion binding; INVOLVED IN: response to carbon dioxide, carbon utilization, regulation of stomatal movement; LOCATED IN: plasma membrane; LOCATED IN: plasma membrane, chloroplast envelope; EXPRESSED IN: 25 plant structures; EXPRESSED DURING: 12 growth stages; CONTAINS InterPro DOMAIN/s: Carbonic anhydrase, prokaryo…	Carbonic anhydrase | Carbonic anhydrase, prokaryotic-like, conserved site	NO
AT1G70430	5	1:26545498-26545578	+	RI	0.32894	0.059433	0.2695	0.941	K2	1.3642	Protein kinase superfamily protein	Protein kinase superfamily protein; FUNCTIONS IN: protein serine/threonine kinase activity, protein kinase activity, kinase activity, ATP binding; INVOLVED IN: protein amino acid phosphorylation; LOCATED IN: cellular_component unknown; EXPRESSED IN: 8 plant structures; EXPRESSED DURING: L mature pollen stage, M germinated pollen stage, 4 anthesis, petal differentiation and expansion stage; CONTAI…	Protein kinase domain | Protein kinase, ATP binding site | Protein kinase-like domain | Serine/threonine/dual specificity protein kinase, catalytic domain	NO
AT1G70518	4	1:26583896-26584247	+	RI	0.58247	0.28252	0.29995	0.978	K1	0.994	other_RNA;(source:Araport11)			NO
AT1G70620	33	1:26630583-26630700	+	RI	0.25999	0.37748	-0.11749	0.989	K3	1.9399	cyclin-related	cyclin-related; FUNCTIONS IN: molecular_function unknown; INVOLVED IN: biological_process unknown; LOCATED IN: cellular_component unknown; EXPRESSED IN: 23 plant structures; EXPRESSED IN: 24 plant structures; EXPRESSED DURING: 13 growth stages		NO
AT1G70900	4	1:26731960-26732381	+	RI	0.21264	0.026165	0.18647	1	K2	1.0622		unknown protein; BEST Arabidopsis thaliana protein match is: unknown protein (TAIR:AT1G23110.4)		NO
AT1G71110	3	1:26818359-26818656	+	RI	0.25308	0.12954	0.12354	0.933	K1	0.8643		unknown protein; FUNCTIONS IN: molecular_function unknown; INVOLVED IN: biological_process unknown; LOCATED IN: endomembrane system; BEST Arabidopsis thaliana protein match is: unknown protein (TAIR:AT2G12400.1)		NO
AT1G71490	2	1:26934019-26934183	-	RI	0.42021	0.68851	-0.26831	0.916	K1	1	Tetratricopeptide repeat (TPR)-like superfamily protein	Tetratricopeptide repeat (TPR)-like superfamily protein; CONTAINS InterPro DOMAIN/s: Pentatricopeptide repeat (InterPro:IPR002885); BEST Arabidopsis thaliana protein match is: Tetratricopeptide repeat (TPR)-like superfamily protein (TAIR:AT1G22830.2)	Pentatricopeptide repeat | Tetratricopeptide-like helical domain	NO
AT1G71866	3	1:27030856-27030956	-	EI/RI	0.6196	0.26165	0.35795	0.93	K2	1.3109		LOCATED IN: endomembrane system; BEST Arabidopsis thaliana protein match is: Putative membrane lipoprotein (TAIR:AT1G34245.1)		NO
AT1G71866	3	1:27030856-27030956	-	RI	0.6196	0.26165	0.35795	0.93	K2	1.3109		LOCATED IN: endomembrane system; BEST Arabidopsis thaliana protein match is: Putative membrane lipoprotein (TAIR:AT1G34245.1)		NO
AT1G72175	4	1:27158069-27158537	+	RI	0.39841	0.18363	0.21478	0.961	K2	1.2641	RING/U-box protein with domain of unknown function (DUF 1232)	FUNCTIONS IN: zinc ion binding; EXPRESSED IN: 23 plant structures; EXPRESSED DURING: 13 growth stages; CONTAINS InterPro DOMAIN/s: Protein of unknown function DUF1232 (InterPro:IPR010652), Zinc finger, RING-type, conserved site (InterPro:IPR017907), Zinc finger, RING-type (InterPro:IPR001841); BEST Arabidopsis thaliana protein match is: RING/U-box protein with domain of unknown function (DUF 1232…	Protein of unknown function DUF1232 | Zinc finger, RING-type | Zinc finger, RING-type, conserved site | Zinc finger, RING/FYVE/PHD-type	NO
AT1G72190	23	1:27167527-27167618	-	RI	0.25214	0.053526	0.19862	0.99	K1	0.9044	D-isomer specific 2-hydroxyacid dehydrogenase family protein	D-isomer specific 2-hydroxyacid dehydrogenase family protein; FUNCTIONS IN: in 6 functions; INVOLVED IN: homoserine biosynthetic process, metabolic process; EXPRESSED IN: 22 plant structures; EXPRESSED DURING: 13 growth stages; CONTAINS InterPro DOMAIN/s: D-isomer specific 2-hydroxyacid dehydrogenase, catalytic domain (InterPro:IPR006139), D-isomer specific 2-hydroxyacid dehydrogenase, NAD-bindin…	D-isomer specific 2-hydroxyacid dehydrogenase, NAD-binding domain | D-isomer specific 2-hydroxyacid dehydrogenase, NAD-binding domain conserved site | D-isomer specific 2-hydroxyacid dehydrogenase, catalytic domain | NAD(P)-binding domain	NO
AT1G72390	3	1:27245327-27245413	+	RI	0.70215	0.030823	0.67132	1	K2	1.088		CONTAINS InterPro DOMAIN/s: Spt20 family (InterPro:IPR021950)	Transcription factor Spt20	NO
AT1G72416	9	1:27259045-27259048	-	AA	0.60761	0.79006	-0.18246	0.911	K2	1.5029	Chaperone DnaJ-domain superfamily protein	Chaperone DnaJ-domain superfamily protein; FUNCTIONS IN: heat shock protein binding; INVOLVED IN: biological_process unknown; LOCATED IN: cellular_component unknown; BEST Arabidopsis thaliana protein match is: Chaperone DnaJ-domain superfamily protein (TAIR:AT3G14200.1); CONTAINS InterPro DOMAIN/s: Molecular chaperone, heat shock protein, Hsp40, DnaJ (InterPro:IPR015609), Heat shock protein DnaJ,…	DnaJ domain | DnaJ domain, conserved site	NO
AT1G72510	3	1:27303521-27303738	+	RI	0.99492	0.88342	0.1115	1	K3	0.6878	Protein of unknown function (DUF1677)	Protein of unknown function (DUF1677); CONTAINS InterPro DOMAIN/s: Protein of unknown function DUF1677, plant (InterPro:IPR012876); BEST Arabidopsis thaliana protein match is: Protein of unknown function (DUF1677) (TAIR:AT2G09970.1)	Protein of unknown function DUF1677, plant	NO
AT1G72700	7	1:27366665-27366823	+	RI	0.16361	0.045785	0.11782	0.967	K2	0.7441	ATPase E1-E2 type family protein / haloacid dehalogenase-like hydrolase family protein	ATPase E1-E2 type family protein / haloacid dehalogenase-like hydrolase family protein; FUNCTIONS IN: ATPase activity, coupled to transmembrane movement of ions, phosphorylative mechanism; INVOLVED IN: metabolic process, ATP biosynthetic process, phospholipid transport; LOCATED IN: integral to membrane, membrane; EXPRESSED IN: 22 plant structures; EXPRESSED DURING: 13 growth stages; CONTAINS Inte…	Cation-transporting P-type ATPase, subfamily IV | Cation-transporting P-type ATPase | HAD-like domain | P-type ATPase, A domain | P-type ATPase, cytoplasmic domain N | P-type ATPase, phosphorylation site	NO
AT1G72880	3	1:27426075-27426113	-	AD	0.69405	0.94605	-0.25201	1	K2	1.5671	Survival protein SurE-like phosphatase/nucleotidase	Survival protein SurE-like phosphatase/nucleotidase; FUNCTIONS IN: hydrolase activity, acid phosphatase activity; INVOLVED IN: biological_process unknown; LOCATED IN: cellular_component unknown; CONTAINS InterPro DOMAIN/s: Survival protein SurE-like phosphatase/nucleotidase (InterPro:IPR002828); BEST Arabidopsis thaliana protein match is: Survival protein SurE-like phosphatase/nucleotidase (TAIR:…	Survival protein SurE-like phosphatase/nucleotidase	NO
AT1G72880	4	1:27425982-27426074	-	RI	0.39247	0.84525	-0.45278	0.999	K2	1.5671	Survival protein SurE-like phosphatase/nucleotidase	Survival protein SurE-like phosphatase/nucleotidase; FUNCTIONS IN: hydrolase activity, acid phosphatase activity; INVOLVED IN: biological_process unknown; LOCATED IN: cellular_component unknown; CONTAINS InterPro DOMAIN/s: Survival protein SurE-like phosphatase/nucleotidase (InterPro:IPR002828); BEST Arabidopsis thaliana protein match is: Survival protein SurE-like phosphatase/nucleotidase (TAIR:…	Survival protein SurE-like phosphatase/nucleotidase	NO
AT1G73090	2	1:27488382-27488620	+	RI	0.63941	0.24859	0.39082	0.986	K1	0.9965		unknown protein; FUNCTIONS IN: molecular_function unknown; INVOLVED IN: biological_process unknown; EXPRESSED IN: 21 plant structures; EXPRESSED DURING: 12 growth stages		NO
AT1G73100	2	1:27491286-27491749	+	RI	0.53923	0.20068	0.33854	0.992	K1	0.9852	SU(VAR)3-9 homolog 3	SU(VAR)3-9 homolog 3 (SUVH3); CONTAINS InterPro DOMAIN/s: SET domain (InterPro:IPR001214), SRA-YDG (InterPro:IPR003105), Pre-SET zinc-binding sub-group (InterPro:IPR003606), Pre-SET domain (InterPro:IPR007728), Post-SET domain (InterPro:IPR003616); BEST Arabidopsis thaliana protein match is: SU(VAR)3-9 homolog 1 (TAIR:AT5G04940.2)	Histone H3-K9 methyltransferase, plant | PUA-like domain | Post-SET domain | Pre-SET domain | Pre-SET zinc-binding sub-group | SET domain | SRA-YDG	NO
AT1G73390	13	1:27594167-27594272	-	RI	0.12387	0.23096	-0.10709	0.907	K4	2.3355	Endosomal targeting BRO1-like domain-containing protein	Endosomal targeting BRO1-like domain-containing protein; FUNCTIONS IN: molecular_function unknown; INVOLVED IN: N-terminal protein myristoylation; LOCATED IN: cellular_component unknown; EXPRESSED IN: 24 plant structures; EXPRESSED DURING: 13 growth stages; CONTAINS InterPro DOMAIN/s: BRO1 (InterPro:IPR004328); BEST Arabidopsis thaliana protein match is: Endosomal targeting BRO1-like domain-conta…	BRO1 domain	NO
AT1G73390	4	1:27594741-27594961	-	AD	0.6869	0.080011	0.60689	1	K4	2.139	Endosomal targeting BRO1-like domain-containing protein	Endosomal targeting BRO1-like domain-containing protein; FUNCTIONS IN: molecular_function unknown; INVOLVED IN: N-terminal protein myristoylation; LOCATED IN: cellular_component unknown; EXPRESSED IN: 24 plant structures; EXPRESSED DURING: 13 growth stages; CONTAINS InterPro DOMAIN/s: BRO1 (InterPro:IPR004328); BEST Arabidopsis thaliana protein match is: Endosomal targeting BRO1-like domain-conta…	BRO1 domain	NO
AT1G73600	3	1:27670809-27670837	+	CE	0.59934	0.033457	0.56588	1	K1	0.9911	S-adenosyl-L-methionine-dependent methyltransferases superfamily protein	S-adenosyl-L-methionine-dependent methyltransferases superfamily protein; FUNCTIONS IN: methyltransferase activity, phosphoethanolamine N-methyltransferase activity; INVOLVED IN: metabolic process; EXPRESSED IN: guard cell; CONTAINS InterPro DOMAIN/s: Methyltransferase type 11 (InterPro:IPR013216); BEST Arabidopsis thaliana protein match is: S-adenosyl-L-methionine-dependent methyltransferases su…	Methyltransferase domain | Phosphoethanolamine N-methyltransferase | S-adenosyl-L-methionine-dependent methyltransferase-like	NO
AT1G73600	5	1:27670838-27671032	+	RI	0.31361	0.03383	0.27978	1	K3	1.7429	S-adenosyl-L-methionine-dependent methyltransferases superfamily protein	S-adenosyl-L-methionine-dependent methyltransferases superfamily protein; FUNCTIONS IN: methyltransferase activity, phosphoethanolamine N-methyltransferase activity; INVOLVED IN: metabolic process; EXPRESSED IN: guard cell; CONTAINS InterPro DOMAIN/s: Methyltransferase type 11 (InterPro:IPR013216); BEST Arabidopsis thaliana protein match is: S-adenosyl-L-methionine-dependent methyltransferases su…	Methyltransferase domain | Phosphoethanolamine N-methyltransferase | S-adenosyl-L-methionine-dependent methyltransferase-like	NO
AT1G73650	8	1:27689664-27689761	-	RI	0.48379	0.0028037	0.48099	1	K1	0.9994	Protein of unknown function (DUF1295)	FUNCTIONS IN: oxidoreductase activity, acting on the CH-CH group of donors; INVOLVED IN: lipid metabolic process; LOCATED IN: plasma membrane; LOCATED IN: plasma membrane, vacuole; EXPRESSED IN: 24 plant structures; EXPRESSED DURING: 13 growth stages; CONTAINS InterPro DOMAIN/s: 3-oxo-5-alpha-steroid 4-dehydrogenase, C-terminal (InterPro:IPR001104), Protein of unknown function DUF1295 (InterPro:I…	3-oxo-5-alpha-steroid 4-dehydrogenase, C-terminal | Protein of unknown function DUF1295	YES	1:27689761:C-T;splice_donor_variant
AT1G73700	6	1:27718913-27719009	-	EI/RI	0.41988	0.81747	-0.39759	0.939	K1	1	MATE efflux family protein	MATE efflux family protein; FUNCTIONS IN: antiporter activity, drug transmembrane transporter activity, transporter activity; INVOLVED IN: drug transmembrane transport, transmembrane transport; LOCATED IN: membrane; EXPRESSED IN: 8 plant structures; EXPRESSED DURING: 4 anthesis, petal differentiation and expansion stage; CONTAINS InterPro DOMAIN/s: MATE family transporter related protein (InterPr…	Multi antimicrobial extrusion protein	NO
AT1G73700	6	1:27718913-27719009	-	RI	0.41988	0.81747	-0.39759	0.939	K1	1	MATE efflux family protein	MATE efflux family protein; FUNCTIONS IN: antiporter activity, drug transmembrane transporter activity, transporter activity; INVOLVED IN: drug transmembrane transport, transmembrane transport; LOCATED IN: membrane; EXPRESSED IN: 8 plant structures; EXPRESSED DURING: 4 anthesis, petal differentiation and expansion stage; CONTAINS InterPro DOMAIN/s: MATE family transporter related protein (InterPr…	Multi antimicrobial extrusion protein	NO
AT1G73875	5	1:27781918-27781970	+	CE	0.81136	0.93235	-0.12099	0.913	K1	0.8367	DNAse I-like superfamily protein	DNAse I-like superfamily protein; CONTAINS InterPro DOMAIN/s: Endonuclease/exonuclease/phosphatase (InterPro:IPR005135); BEST Arabidopsis thaliana protein match is: DNAse I-like superfamily protein (TAIR:AT3G18500.2)	Endonuclease/exonuclease/phosphatase	NO
AT1G73930	4	1:27797681-27797863	-	RI	0.60153	0.83281	-0.23127	0.997	K1	0.9852		unknown protein; CONTAINS InterPro DOMAIN/s: Protein of unknown function DUF1630 (InterPro:IPR012860)	DENND6	NO
AT1G73970	3	1:27817591-27817657	+	EI/RI	0.94788	0.83218	0.1157	0.913	K1	0.6724		unknown protein	Armadillo-type fold	NO
AT1G73970	3	1:27817591-27817657	+	RI	0.94788	0.83218	0.1157	0.913	K1	0.6724		unknown protein	Armadillo-type fold	NO
AT1G74390	13	1:27962922-27963011	-	RI	0.41168	0.12672	0.28496	0.939	K2	1.3945	Polynucleotidyl transferase, ribonuclease H-like superfamily protein	Polynucleotidyl transferase, ribonuclease H-like superfamily protein; FUNCTIONS IN: exonuclease activity, nucleic acid binding; LOCATED IN: intracellular; EXPRESSED IN: 12 plant structures; EXPRESSED DURING: 6 growth stages; CONTAINS InterPro DOMAIN/s: Exonuclease (InterPro:IPR006055), Polynucleotidyl transferase, ribonuclease H fold (InterPro:IPR012337), Exonuclease, RNase T/DNA polymerase III (…	Exonuclease | Exonuclease, RNase T/DNA polymerase III | Ribonuclease H-like domain	NO
AT1G74650	6	1:28041853-28042043	+	RI	0.27119	0.61766	-0.34648	0.953	K1	0.9968	myb domain protein 31	myb domain protein 31 (MYB31); CONTAINS InterPro DOMAIN/s: SANT, DNA-binding (InterPro:IPR001005), Homeodomain-like (InterPro:IPR009057), Myb, DNA-binding (InterPro:IPR014778), HTH transcriptional regulator, Myb-type, DNA-binding (InterPro:IPR017930), Homeodomain-related (InterPro:IPR012287), Myb transcription factor (InterPro:IPR015495); BEST Arabidopsis thaliana protein match is: myb domain pro…	Homeodomain-like | Myb domain | SANT/Myb domain	NO
AT1G74670	2	1:28053474-28053603	+	RI	0.88993	0.4447	0.44524	1	K1	0.9998	Gibberellin-regulated family protein	Gibberellin-regulated family protein; FUNCTIONS IN: molecular_function unknown; INVOLVED IN: in 6 processes; LOCATED IN: endomembrane system; EXPRESSED IN: 21 plant structures; EXPRESSED DURING: 13 growth stages; CONTAINS InterPro DOMAIN/s: Gibberellin regulated protein (InterPro:IPR003854); BEST Arabidopsis thaliana protein match is: GAST1 protein homolog 4 (TAIR:AT5G15230.1)	Gibberellin regulated protein	NO
AT1G75020	7	1:28171245-28171749	+	RI	0.24826	0.10009	0.14817	0.98	K3	1.9136	lysophosphatidyl acyltransferase 4	lysophosphatidyl acyltransferase 4 (LPAT4); FUNCTIONS IN: acyltransferase activity; INVOLVED IN: metabolic process; EXPRESSED IN: 25 plant structures; EXPRESSED DURING: 13 growth stages; CONTAINS InterPro DOMAIN/s: Phospholipid/glycerol acyltransferase (InterPro:IPR002123); BEST Arabidopsis thaliana protein match is: lysophosphatidyl acyltransferase 5 (TAIR:AT3G18850.4)	Phospholipid/glycerol acyltransferase	NO
AT1G75020	8	1:28171750-28172347	+	CE	0.90479	0.7243	0.18049	0.992	K3	1.8958	lysophosphatidyl acyltransferase 4	lysophosphatidyl acyltransferase 4 (LPAT4); FUNCTIONS IN: acyltransferase activity; INVOLVED IN: metabolic process; EXPRESSED IN: 25 plant structures; EXPRESSED DURING: 13 growth stages; CONTAINS InterPro DOMAIN/s: Phospholipid/glycerol acyltransferase (InterPro:IPR002123); BEST Arabidopsis thaliana protein match is: lysophosphatidyl acyltransferase 5 (TAIR:AT3G18850.4)	Phospholipid/glycerol acyltransferase	NO
AT1G75180	4	1:28218009-28218146	-	RI	0.44165	0.06565	0.376	1	K2	1.4062	Erythronate-4-phosphate dehydrogenase family protein	Erythronate-4-phosphate dehydrogenase family protein; BEST Arabidopsis thaliana protein match is: Erythronate-4-phosphate dehydrogenase family protein (TAIR:AT1G19400.2)		NO
AT1G75410	6	1:28301951-28302402	-	RI	0.91432	0.1206	0.79372	1	K2	0.6136	BEL1-like homeodomain 3	BEL1-like homeodomain 3 (BLH3); CONTAINS InterPro DOMAIN/s: Homeobox (InterPro:IPR001356), Homeodomain-like (InterPro:IPR009057), POX (InterPro:IPR006563), Homeodomain-related (InterPro:IPR012287); BEST Arabidopsis thaliana protein match is: BEL1-like homeodomain 10 (TAIR:AT1G19700.3)	Homeobox KN domain | Homeobox domain | Homeodomain-like | POX domain	NO
AT1G75420	4	1:28305372-28305541	+	RI	0.59511	0.89035	-0.29524	0.999	K1	0.9972	UDP-Glycosyltransferase superfamily protein	UDP-Glycosyltransferase superfamily protein; FUNCTIONS IN: transferase activity, transferring glycosyl groups; INVOLVED IN: biosynthetic process; LOCATED IN: cellular_component unknown; EXPRESSED IN: 22 plant structures; EXPRESSED DURING: 13 growth stages; CONTAINS InterPro DOMAIN/s: Glycosyl transferase, group 1 (InterPro:IPR001296); BEST Arabidopsis thaliana protein match is: UDP-Glycosyltransf…	Glycosyl transferase, family 1	NO
AT1G75860	6	1:28485163-28485662	-	RI	0.95859	0.75036	0.20823	1	K1	0.8186		unknown protein; BEST Arabidopsis thaliana protein match is: unknown protein (TAIR:AT1G20100.1)		NO
AT1G75945	2	1:28515495-28515705	-	RI	0.56981	0.094105	0.47571	1	K1	0.9994	hypothetical protein;(source:Araport11)			NO
AT1G76170	14	1:28585305-28585403	-	EI/RI	0.19118	0.068516	0.12267	0.955	K1	0.758	2-thiocytidine tRNA biosynthesis protein, TtcA	2-thiocytidine tRNA biosynthesis protein, TtcA; FUNCTIONS IN: ATP binding; INVOLVED IN: tRNA processing; LOCATED IN: cellular_component unknown; EXPRESSED IN: 20 plant structures; EXPRESSED DURING: 13 growth stages; CONTAINS InterPro DOMAIN/s: Rossmann-like alpha/beta/alpha sandwich fold (InterPro:IPR014729), Uncharacterised protein family UPF0021, C-terminal (InterPro:IPR000541), PP-loop (InterP…	2-thiocytidine tRNA biosynthesis protein, TtcA | Cytoplasmic tRNA 2-thiolation protein 1 | Rossmann-like alpha/beta/alpha sandwich fold | tRNA(Ile)-lysidine/2-thiocytidine synthase	NO
AT1G76170	14	1:28585305-28585403	-	RI	0.19118	0.068516	0.12267	0.955	K1	0.758	2-thiocytidine tRNA biosynthesis protein, TtcA	2-thiocytidine tRNA biosynthesis protein, TtcA; FUNCTIONS IN: ATP binding; INVOLVED IN: tRNA processing; LOCATED IN: cellular_component unknown; EXPRESSED IN: 20 plant structures; EXPRESSED DURING: 13 growth stages; CONTAINS InterPro DOMAIN/s: Rossmann-like alpha/beta/alpha sandwich fold (InterPro:IPR014729), Uncharacterised protein family UPF0021, C-terminal (InterPro:IPR000541), PP-loop (InterP…	2-thiocytidine tRNA biosynthesis protein, TtcA | Cytoplasmic tRNA 2-thiolation protein 1 | Rossmann-like alpha/beta/alpha sandwich fold | tRNA(Ile)-lysidine/2-thiocytidine synthase	NO
AT1G76280	20	1:28620268-28620363	-	CE	0.77906	0.91357	-0.1345	0.908	K3	1.4257	Tetratricopeptide repeat (TPR)-like superfamily protein	Tetratricopeptide repeat (TPR)-like superfamily protein; FUNCTIONS IN: molecular_function unknown; INVOLVED IN: biological_process unknown; LOCATED IN: mitochondrion; EXPRESSED IN: stem; CONTAINS InterPro DOMAIN/s: Pentatricopeptide repeat (InterPro:IPR002885); BEST Arabidopsis thaliana protein match is: Tetratricopeptide repeat (TPR)-like superfamily protein (TAIR:AT2G18940.1); BEST Arabidopsis …	Pentatricopeptide repeat | Tetratricopeptide-like helical domain	NO
AT1G76350	7	1:28640035-28640115	+	RI	0.52734	0.17623	0.35111	0.955	K2	0.9905	Plant regulator RWP-RK family protein	Plant regulator RWP-RK family protein; CONTAINS InterPro DOMAIN/s: Octicosapeptide/Phox/Bem1p (InterPro:IPR000270), Plant regulator RWP-RK (InterPro:IPR003035); BEST Arabidopsis thaliana protein match is: Plant regulator RWP-RK family protein (TAIR:AT1G20640.2)	Phox/Bem1p | RWP-RK domain	NO
AT1G76730	5	1:28804229-28804310	-	RI	0.29726	0.18203	0.11523	0.914	K1	0.9094	NagB/RpiA/CoA transferase-like superfamily protein	NagB/RpiA/CoA transferase-like superfamily protein; FUNCTIONS IN: catalytic activity, ATP binding, 5-formyltetrahydrofolate cyclo-ligase activity; INVOLVED IN: folic acid and derivative biosynthetic process, metabolic process; LOCATED IN: chloroplast; EXPRESSED IN: 22 plant structures; EXPRESSED DURING: 15 growth stages; CONTAINS InterPro DOMAIN/s: 5-formyltetrahydrofolate cyclo-ligase (InterPro:…	5-formyltetrahydrofolate cyclo-ligase | 5-formyltetrahydrofolate cyclo-ligase-like domain	NO
AT1G76760	3	1:28812488-28812762	-	RI	0.41223	0.13129	0.28094	0.992	K3	1.1417	thioredoxin Y1	thioredoxin Y1 (TY1); FUNCTIONS IN: electron carrier activity, protein disulfide oxidoreductase activity; INVOLVED IN: glycerol ether metabolic process, cell redox homeostasis; LOCATED IN: chloroplast stroma; EXPRESSED IN: 24 plant structures; EXPRESSED DURING: 15 growth stages; CONTAINS InterPro DOMAIN/s: Thioredoxin fold (InterPro:IPR012335), Thioredoxin, core (InterPro:IPR015467), Thioredoxin …	Thioredoxin | Thioredoxin domain | Thioredoxin, conserved site | Thioredoxin-like fold	NO
AT1G76850	15	1:28849840-28849969	+	RI	0.16471	0.30433	-0.13962	0.988	K2	0.9173	exocyst complex component sec5	exocyst complex component sec5 (SEC5A); FUNCTIONS IN: molecular_function unknown; INVOLVED IN: pollen germination, pollen tube growth; LOCATED IN: cytosol, plasma membrane; EXPRESSED IN: 24 plant structures; EXPRESSED DURING: 13 growth stages; BEST Arabidopsis thaliana protein match is: Exocyst complex component SEC5 (TAIR:AT1G21170.1)	Cullin repeat-like-containing domain | Exocyst complex component Sec5	NO
AT1G76970	10	1:28924571-28924649	-	CE	0.98561	0.87398	0.11163	0.988	K3	1.1969	Target of Myb protein 1	Target of Myb protein 1; FUNCTIONS IN: protein transporter activity; INVOLVED IN: intracellular protein transport, intra-Golgi vesicle-mediated transport; LOCATED IN: Golgi stack, intracellular; EXPRESSED IN: 21 plant structures; EXPRESSED DURING: 13 growth stages; CONTAINS InterPro DOMAIN/s: VHS (InterPro:IPR002014), Target of Myb protein 1 (InterPro:IPR014645), GAT (InterPro:IPR004152), VHS sub…	ENTH/VHS | GAT | Target of Myb protein 1 | VHS | VHS subgroup	NO
AT1G76970	7	1:28924901-28924986	-	RI	0.68147	0.15954	0.52193	0.995	K3	1.1892	Target of Myb protein 1	Target of Myb protein 1; FUNCTIONS IN: protein transporter activity; INVOLVED IN: intracellular protein transport, intra-Golgi vesicle-mediated transport; LOCATED IN: Golgi stack, intracellular; EXPRESSED IN: 21 plant structures; EXPRESSED DURING: 13 growth stages; CONTAINS InterPro DOMAIN/s: VHS (InterPro:IPR002014), Target of Myb protein 1 (InterPro:IPR014645), GAT (InterPro:IPR004152), VHS sub…	ENTH/VHS | GAT | Target of Myb protein 1 | VHS | VHS subgroup	NO
AT1G76970	8	1:28924745-28924900	-	CE	0.99187	0.88423	0.10764	0.993	K3	1.1969	Target of Myb protein 1	Target of Myb protein 1; FUNCTIONS IN: protein transporter activity; INVOLVED IN: intracellular protein transport, intra-Golgi vesicle-mediated transport; LOCATED IN: Golgi stack, intracellular; EXPRESSED IN: 21 plant structures; EXPRESSED DURING: 13 growth stages; CONTAINS InterPro DOMAIN/s: VHS (InterPro:IPR002014), Target of Myb protein 1 (InterPro:IPR014645), GAT (InterPro:IPR004152), VHS sub…	ENTH/VHS | GAT | Target of Myb protein 1 | VHS | VHS subgroup	NO
AT1G77080	20	1:28958664-28958744	+	EI/RI	0.24047	0.34473	-0.10426	0.971	K4	1.3158	K-box region and MADS-box transcription factor family protein	K-box region and MADS-box transcription factor family protein ; MADS AFFECTING FLOWERING 1 (MAF1); FUNCTIONS IN: sequence-specific DNA binding transcription factor activity; INVOLVED IN: photoperiodism, flowering, negative regulation of flower development, regulation of transcription, DNA-dependent, regulation of flower development; LOCATED IN: nucleus; EXPRESSED IN: 24 plant structures; EXPRESSE…	Transcription factor, K-box | Transcription factor, MADS-box	NO
AT1G77080	20	1:28958664-28958744	+	RI	0.24047	0.34473	-0.10426	0.971	K4	1.3158	K-box region and MADS-box transcription factor family protein	K-box region and MADS-box transcription factor family protein ; MADS AFFECTING FLOWERING 1 (MAF1); FUNCTIONS IN: sequence-specific DNA binding transcription factor activity; INVOLVED IN: photoperiodism, flowering, negative regulation of flower development, regulation of transcription, DNA-dependent, regulation of flower development; LOCATED IN: nucleus; EXPRESSED IN: 24 plant structures; EXPRESSE…	Transcription factor, K-box | Transcription factor, MADS-box	NO
AT1G77180	3	1:29001665-29001840	-	AA	0.10316	0.20355	-0.10039	0.994	K1	0.7717	chromatin protein family	SKIP; CONTAINS InterPro DOMAIN/s: SKI-interacting protein, SKIP (InterPro:IPR017862), SKI-interacting protein SKIP, SNW domain (InterPro:IPR004015); FUNCTIONS IN: transcription activator activity; INVOLVED IN: response to salt stress, response to mannitol stimulus, RNA splicing, response to abscisic acid stimulus; LOCATED IN: nucleolus, nucleus; EXPRESSED IN: 27 plant structures; EXPRESSED DURING…	SKI-interacting protein SKIP, SNW domain | SKI-interacting protein, SKIP	NO
AT1G77250	3	1:29023332-29023404	-	AD	0.86083	0.97136	-0.11053	0.95	K1	0.6193	RING/FYVE/PHD-type zinc finger family protein	RING/FYVE/PHD-type zinc finger family protein; FUNCTIONS IN: DNA binding, zinc ion binding; INVOLVED IN: regulation of transcription, DNA-dependent; EXPRESSED IN: 24 plant structures; EXPRESSED DURING: 15 growth stages; CONTAINS InterPro DOMAIN/s: Zinc finger, PHD-type, conserved site (InterPro:IPR019786), Zinc finger, PHD-type (InterPro:IPR001965), Zinc finger, FYVE/PHD-type (InterPro:IPR011011)…	Zinc finger, FYVE/PHD-type | Zinc finger, PHD-finger | Zinc finger, PHD-type | Zinc finger, PHD-type, conserved site | Zinc finger, RING/FYVE/PHD-type	NO
AT1G77270	4	1:29027997-29028130	+	RI	0.6806	0.50955	0.17105	0.911	K2	1.226		unknown protein; BEST Arabidopsis thaliana protein match is: unknown protein (TAIR:AT3G07730.1)		NO
AT1G77290	3	1:29038544-29038876	+	RI	0.87717	0.33125	0.54592	1	K1	0.9397	Glutathione S-transferase family protein	Glutathione S-transferase family protein; INVOLVED IN: pentachlorophenol catabolic process; LOCATED IN: plasma membrane; CONTAINS InterPro DOMAIN/s: Thioredoxin fold (InterPro:IPR012335), Glutathione S-transferase, C-terminal (InterPro:IPR004046), Glutathione S-transferase, C-terminal-like (InterPro:IPR010987), Glutathione S-transferase/chloride channel, C-terminal (InterPro:IPR017933), Glutathio…	Glutathione S-transferase, C-terminal-like | Glutathione S-transferase, N-terminal | Thioredoxin-like fold	NO
AT1G77580	4	1:29146838-29147364	-	RI	0.38547	0.19396	0.19151	0.915	K1	0.9955	Plant protein of unknown function (DUF869)	Plant protein of unknown function (DUF869); CONTAINS InterPro DOMAIN/s: Protein of unknown function DUF869, plant (InterPro:IPR008587); BEST Arabidopsis thaliana protein match is: Plant protein of unknown function (DUF869) (TAIR:AT1G21810.1)	Filament-like plant protein	NO
AT1G78000	19	1:29331486-29331572	+	RI	0.046429	0.16057	-0.11414	0.992	K1	0.7219	sulfate transporter 1;2	sulfate transporter 1;2 (SULTR1;2); CONTAINS InterPro DOMAIN/s: Sulphate transporter (InterPro:IPR011547), Sulphate transporter/antisigma-factor antagonist STAS (InterPro:IPR002645), Sulphate anion transporter, conserved site (InterPro:IPR018045), Sulphate anion transporter (InterPro:IPR001902); BEST Arabidopsis thaliana protein match is: sulfate transporter 1;3 (TAIR:AT1G22150.1)	STAS domain | Sulphate anion transporter | Sulphate anion transporter, conserved site | Sulphate transporter	NO
AT1G78000	25	1:29332452-29332544	+	RI	0.076171	0.19321	-0.11704	0.999	K1	0.711	sulfate transporter 1;2	sulfate transporter 1;2 (SULTR1;2); CONTAINS InterPro DOMAIN/s: Sulphate transporter (InterPro:IPR011547), Sulphate transporter/antisigma-factor antagonist STAS (InterPro:IPR002645), Sulphate anion transporter, conserved site (InterPro:IPR018045), Sulphate anion transporter (InterPro:IPR001902); BEST Arabidopsis thaliana protein match is: sulfate transporter 1;3 (TAIR:AT1G22150.1)	STAS domain | Sulphate anion transporter | Sulphate anion transporter, conserved site | Sulphate transporter	NO
AT1G78000	27	1:29332622-29332733	+	RI	0.13548	0.35789	-0.22241	1	K1	0.9535	sulfate transporter 1;2	sulfate transporter 1;2 (SULTR1;2); CONTAINS InterPro DOMAIN/s: Sulphate transporter (InterPro:IPR011547), Sulphate transporter/antisigma-factor antagonist STAS (InterPro:IPR002645), Sulphate anion transporter, conserved site (InterPro:IPR018045), Sulphate anion transporter (InterPro:IPR001902); BEST Arabidopsis thaliana protein match is: sulfate transporter 1;3 (TAIR:AT1G22150.1)	STAS domain | Sulphate anion transporter | Sulphate anion transporter, conserved site | Sulphate transporter	NO
AT1G78200	5	1:29420381-29420476	+	RI	0.32354	0.56725	-0.24371	0.996	K1	0.9988	Protein phosphatase 2C family protein	Protein phosphatase 2C family protein; FUNCTIONS IN: protein serine/threonine phosphatase activity, catalytic activity; INVOLVED IN: biological_process unknown; LOCATED IN: plasma membrane; EXPRESSED IN: 24 plant structures; EXPRESSED DURING: 15 growth stages; CONTAINS InterPro DOMAIN/s: Protein phosphatase 2C-related (InterPro:IPR001932), Protein phosphatase 2C (InterPro:IPR015655), Protein phos…	Protein phosphatase 2C | Protein phosphatase 2C (PP2C)-like domain	NO
AT1G78290	11	1:29458363-29458455	-	RI	0.082016	0.20242	-0.1204	0.971	K1	0.7554	Protein kinase superfamily protein	Protein kinase superfamily protein; FUNCTIONS IN: protein serine/threonine kinase activity, protein kinase activity, kinase activity, ATP binding; INVOLVED IN: response to karrikin; LOCATED IN: nucleus, cytoplasm; EXPRESSED IN: 22 plant structures; EXPRESSED DURING: 12 growth stages; CONTAINS InterPro DOMAIN/s: Protein kinase, ATP binding site (InterPro:IPR017441), Serine/threonine-protein kinase…	Protein kinase domain | Protein kinase, ATP binding site | Protein kinase-like domain | Serine/threonine-protein kinase, active site | Serine/threonine/dual specificity protein kinase, catalytic domain	NO
AT1G78290	5	1:29458921-29459011	-	RI	0.90102	0.76566	0.13536	0.967	K2	1.0351	Protein kinase superfamily protein	Protein kinase superfamily protein; FUNCTIONS IN: protein serine/threonine kinase activity, protein kinase activity, kinase activity, ATP binding; INVOLVED IN: response to karrikin; LOCATED IN: nucleus, cytoplasm; EXPRESSED IN: 22 plant structures; EXPRESSED DURING: 12 growth stages; CONTAINS InterPro DOMAIN/s: Protein kinase, ATP binding site (InterPro:IPR017441), Serine/threonine-protein kinase…	Protein kinase domain | Protein kinase, ATP binding site | Protein kinase-like domain | Serine/threonine-protein kinase, active site | Serine/threonine/dual specificity protein kinase, catalytic domain	NO
AT1G78420	3	1:29504838-29505079	+	RI	0.4664	0.007545	0.45885	1	K1	0.999	RING/U-box superfamily protein	RING/U-box superfamily protein; FUNCTIONS IN: zinc ion binding; EXPRESSED IN: 24 plant structures; INVOLVED IN: N-terminal protein myristoylation; EXPRESSED DURING: 13 growth stages; CONTAINS InterPro DOMAIN/s: Zinc finger, RING-type (InterPro:IPR001841); BEST Arabidopsis thaliana protein match is: RING/U-box superfamily protein (TAIR:AT1G17145.1)	Zinc finger, RING-type	NO
AT1G78550	4	1:29546151-29546265	-	EI/RI	0.84409	0.98199	-0.1379	0.991	K1	0.8095	2-oxoglutarate (2OG) and Fe(II)-dependent oxygenase superfamily protein	2-oxoglutarate (2OG) and Fe(II)-dependent oxygenase superfamily protein; FUNCTIONS IN: oxidoreductase activity, iron ion binding; INVOLVED IN: oxidation reduction; EXPRESSED IN: 22 plant structures; EXPRESSED DURING: 13 growth stages; CONTAINS InterPro DOMAIN/s: Isopenicillin N synthase (InterPro:IPR002283), Oxoglutarate/iron-dependent oxygenase (InterPro:IPR005123); BEST Arabidopsis thaliana pro…	Isopenicillin N synthase | Isopenicillin N synthase-like | Non-haem dioxygenase N-terminal domain | Oxoglutarate/iron-dependent dioxygenase	NO
AT1G78550	4	1:29546151-29546265	-	RI	0.84409	0.98199	-0.1379	0.991	K1	0.8095	2-oxoglutarate (2OG) and Fe(II)-dependent oxygenase superfamily protein	2-oxoglutarate (2OG) and Fe(II)-dependent oxygenase superfamily protein; FUNCTIONS IN: oxidoreductase activity, iron ion binding; INVOLVED IN: oxidation reduction; EXPRESSED IN: 22 plant structures; EXPRESSED DURING: 13 growth stages; CONTAINS InterPro DOMAIN/s: Isopenicillin N synthase (InterPro:IPR002283), Oxoglutarate/iron-dependent oxygenase (InterPro:IPR005123); BEST Arabidopsis thaliana pro…	Isopenicillin N synthase | Isopenicillin N synthase-like | Non-haem dioxygenase N-terminal domain | Oxoglutarate/iron-dependent dioxygenase	NO
AT1G78580	7	1:29557661-29557701	-	CE	0.34472	0.14541	0.19931	0.953	K2	1.4011	trehalose-6-phosphate synthase	trehalose-6-phosphate synthase (TPS1); CONTAINS InterPro DOMAIN/s: Alpha,alpha-trehalose-phosphate synthase (InterPro:IPR012766), Glycosyl transferase, family 20 (InterPro:IPR001830), Trehalose-phosphatase (InterPro:IPR003337); BEST Arabidopsis thaliana protein match is: trehalose-phosphatase/synthase 2 (TAIR:AT1G16980.1)	Alpha,alpha-trehalose-phosphate synthase | Glycosyl transferase, family 20 | HAD-like domain | Trehalose-phosphatase	NO
AT1G78580	7	1:29557702-29557883	-	RI	0.33182	0.046798	0.28503	1	K3	1.8428	trehalose-6-phosphate synthase	trehalose-6-phosphate synthase (TPS1); CONTAINS InterPro DOMAIN/s: Alpha,alpha-trehalose-phosphate synthase (InterPro:IPR012766), Glycosyl transferase, family 20 (InterPro:IPR001830), Trehalose-phosphatase (InterPro:IPR003337); BEST Arabidopsis thaliana protein match is: trehalose-phosphatase/synthase 2 (TAIR:AT1G16980.1)	Alpha,alpha-trehalose-phosphate synthase | Glycosyl transferase, family 20 | HAD-like domain | Trehalose-phosphatase	NO
AT1G78865	2	1:29649506-29649842	-	RI	0.87495	0.63888	0.23607	0.916	K1	0.9641	other_RNA;(source:Araport11)			NO
AT1G78910	14	1:29666646-29666750	+	RI	0.37386	0.064124	0.30974	0.999	K1	0.9954	Pseudouridine synthase family protein	Pseudouridine synthase family protein; FUNCTIONS IN: pseudouridine synthase activity; INVOLVED IN: pseudouridine synthesis, RNA modification; CONTAINS InterPro DOMAIN/s: Pseudouridine synthase, catalytic domain (InterPro:IPR020103), Pseudouridine synthase, RsuA and RluB/C/D/E/F (InterPro:IPR006145), Pseudouridine synthase, RluC/RluD, conserved site (InterPro:IPR006224); BEST Arabidopsis thaliana …	Pseudouridine synthase, RluC/RluD, conserved site | Pseudouridine synthase, RsuA/RluB/C/D/E/F | Pseudouridine synthase, catalytic domain	NO
AT1G78910	16	1:29666853-29666928	+	RI	0.4991	0.065123	0.43398	1	K1	0.9997	Pseudouridine synthase family protein	Pseudouridine synthase family protein; FUNCTIONS IN: pseudouridine synthase activity; INVOLVED IN: pseudouridine synthesis, RNA modification; CONTAINS InterPro DOMAIN/s: Pseudouridine synthase, catalytic domain (InterPro:IPR020103), Pseudouridine synthase, RsuA and RluB/C/D/E/F (InterPro:IPR006145), Pseudouridine synthase, RluC/RluD, conserved site (InterPro:IPR006224); BEST Arabidopsis thaliana …	Pseudouridine synthase, RluC/RluD, conserved site | Pseudouridine synthase, RsuA/RluB/C/D/E/F | Pseudouridine synthase, catalytic domain	NO
AT1G78910	18	1:29667088-29667179	+	RI	0.6023	0.087124	0.51517	1	K1	0.9902	Pseudouridine synthase family protein	Pseudouridine synthase family protein; FUNCTIONS IN: pseudouridine synthase activity; INVOLVED IN: pseudouridine synthesis, RNA modification; CONTAINS InterPro DOMAIN/s: Pseudouridine synthase, catalytic domain (InterPro:IPR020103), Pseudouridine synthase, RsuA and RluB/C/D/E/F (InterPro:IPR006145), Pseudouridine synthase, RluC/RluD, conserved site (InterPro:IPR006224); BEST Arabidopsis thaliana …	Pseudouridine synthase, RluC/RluD, conserved site | Pseudouridine synthase, RsuA/RluB/C/D/E/F | Pseudouridine synthase, catalytic domain	NO
AT1G79245	29	1:29807691-29807715	-	AD	0.86	0.96575	-0.10575	0.962	K4	1.4646		expressed protein, Several heterogeneous transcript sequences map to this position		NO
AT1G79245	30	1:29807587-29807690	-	RI	0.84009	0.95765	-0.11757	0.965	K4	1.4611		expressed protein, Several heterogeneous transcript sequences map to this position		NO
AT1G79245	40	1:29806939-29807029	-	RI	0.85179	0.96029	-0.1085	0.983	K6	2.8239		expressed protein, Several heterogeneous transcript sequences map to this position		NO
AT1G79270	4	1:29815874-29816190	+	AD	0.908	0.43743	0.47057	1	K2	1.8911	evolutionarily conserved C-terminal region 8	evolutionarily conserved C-terminal region 8 (ECT8); CONTAINS InterPro DOMAIN/s: YTH domain (InterPro:IPR007275); BEST Arabidopsis thaliana protein match is: evolutionarily conserved C-terminal region 6 (TAIR:AT3G17330.1)	YTH domain	NO
AT1G79270	7	1:29816511-29816515	+	AD	0.22472	0.047964	0.17675	0.994	K2	1.8911	evolutionarily conserved C-terminal region 8	evolutionarily conserved C-terminal region 8 (ECT8); CONTAINS InterPro DOMAIN/s: YTH domain (InterPro:IPR007275); BEST Arabidopsis thaliana protein match is: evolutionarily conserved C-terminal region 6 (TAIR:AT3G17330.1)	YTH domain	NO
AT1G79270	8	1:29816516-29816606	+	RI	0.78889	0.17846	0.61043	1	K3	1.6852	evolutionarily conserved C-terminal region 8	evolutionarily conserved C-terminal region 8 (ECT8); CONTAINS InterPro DOMAIN/s: YTH domain (InterPro:IPR007275); BEST Arabidopsis thaliana protein match is: evolutionarily conserved C-terminal region 6 (TAIR:AT3G17330.1)	YTH domain	NO
AT1G79530	24	1:29916460-29916543	-	RI	0.035775	0.25432	-0.21855	0.981	K1	0.9544	glyceraldehyde-3-phosphate dehydrogenase of plastid 1	glyceraldehyde-3-phosphate dehydrogenase of plastid 1 (GAPCP-1); FUNCTIONS IN: glyceraldehyde-3-phosphate dehydrogenase (phosphorylating) activity, copper ion binding, glyceraldehyde-3-phosphate dehydrogenase activity, zinc ion binding; INVOLVED IN: in 6 processes; LOCATED IN: plastid, membrane; EXPRESSED IN: guard cell, leaf; CONTAINS InterPro DOMAIN/s: Glyceraldehyde 3-phosphate dehydrogenase s…	Glyceraldehyde 3-phosphate dehydrogenase, NAD(P) binding domain | Glyceraldehyde 3-phosphate dehydrogenase, active site | Glyceraldehyde 3-phosphate dehydrogenase, catalytic domain | Glyceraldehyde-3-phosphate dehydrogenase, type I | Glyceraldehyde/Erythrose phosphate dehydrogenase family | NAD(P)-binding domain	NO
AT1G79570	7	1:29937649-29938042	-	RI	0.49056	0.14549	0.34506	0.953	K2	1.4831	Protein kinase superfamily protein with octicosapeptide/Phox/Bem1p domain	Protein kinase superfamily protein with octicosapeptide/Phox/Bem1p domain; FUNCTIONS IN: protein serine/threonine/tyrosine kinase activity, protein kinase activity; INVOLVED IN: protein amino acid phosphorylation; LOCATED IN: cytosol; EXPRESSED IN: male gametophyte, pollen tube; EXPRESSED DURING: L mature pollen stage, M germinated pollen stage; CONTAINS InterPro DOMAIN/s: Octicosapeptide/Phox/Be…	Phox/Bem1p | Protein kinase domain | Protein kinase, ATP binding site | Protein kinase-like domain | Serine-threonine/tyrosine-protein kinase catalytic domain	NO
AT1G79620	32	1:29958982-29959135	-	RI	0.070177	0.2387	-0.16852	0.952	K1	0.7974	Leucine-rich repeat protein kinase family protein	Leucine-rich repeat protein kinase family protein; FUNCTIONS IN: protein serine/threonine kinase activity, kinase activity, ATP binding; INVOLVED IN: transmembrane receptor protein tyrosine kinase signaling pathway, protein amino acid phosphorylation; LOCATED IN: endomembrane system; EXPRESSED IN: 8 plant structures; EXPRESSED DURING: 4 anthesis, petal differentiation and expansion stage; CONTAIN…	Concanavalin A-like lectin/glucanase, subgroup | Leucine-rich repeat | Leucine-rich repeat-containing N-terminal, type 2 | Protein kinase domain | Protein kinase, ATP binding site | Protein kinase-like domain | Serine-threonine/tyrosine-protein kinase catalytic domain | Serine/threonine-protein kinase, active site	NO
AT1G79640	10	1:29971249-29971366	-	RI	0.67641	0.21741	0.459	0.998	K2	1.4093	Protein kinase superfamily protein	Protein kinase superfamily protein; FUNCTIONS IN: protein serine/threonine kinase activity, protein kinase activity, kinase activity, ATP binding; INVOLVED IN: protein amino acid phosphorylation; LOCATED IN: cellular_component unknown; EXPRESSED IN: 23 plant structures; EXPRESSED DURING: 14 growth stages; CONTAINS InterPro DOMAIN/s: Protein kinase, ATP binding site (InterPro:IPR017441), Protein k…	Protein kinase domain | Protein kinase, ATP binding site | Protein kinase-like domain | Serine/threonine/dual specificity protein kinase, catalytic domain	NO
AT1G79690	4	1:29985243-29985331	+	RI	0.48016	0.89394	-0.41377	0.989	K1	1	nudix hydrolase homolog 3	nudix hydrolase homolog 3 (NUDT3); FUNCTIONS IN: dipeptidyl-peptidase activity, hydrolase activity; INVOLVED IN: proteolysis; LOCATED IN: cytosol, vacuole; EXPRESSED IN: 23 plant structures; EXPRESSED DURING: 13 growth stages; CONTAINS InterPro DOMAIN/s: NUDIX hydrolase domain-like (InterPro:IPR015797), Peptidase M49, dipeptidyl-peptidase III (InterPro:IPR005317), NUDIX hydrolase domain (InterPro…	NUDIX hydrolase domain | NUDIX hydrolase domain-like	NO
AT1G79700	10	1:29991955-29992005	-	CE	0.87121	0.97272	-0.10152	1	K3	1.5087	Integrase-type DNA-binding superfamily protein	Integrase-type DNA-binding superfamily protein; CONTAINS InterPro DOMAIN/s: DNA-binding, integrase-type (InterPro:IPR016177), Pathogenesis-related transcriptional factor/ERF, DNA-binding (InterPro:IPR001471); BEST Arabidopsis thaliana protein match is: ARIA-interacting double AP2 domain protein (TAIR:AT1G16060.1)	AP2/ERF domain | DNA-binding domain	NO
AT1G79700	18	1:29990826-29991803	-	RI	0.28956	0.53489	-0.24532	1	K5	2.4459	Integrase-type DNA-binding superfamily protein	Integrase-type DNA-binding superfamily protein; CONTAINS InterPro DOMAIN/s: DNA-binding, integrase-type (InterPro:IPR016177), Pathogenesis-related transcriptional factor/ERF, DNA-binding (InterPro:IPR001471); BEST Arabidopsis thaliana protein match is: ARIA-interacting double AP2 domain protein (TAIR:AT1G16060.1)	AP2/ERF domain | DNA-binding domain	NO
AT1G79740	5	1:30006756-30006849	-	RI	0.89018	0.77709	0.11308	0.966	K1	0.8377	hAT transposon superfamily	hAT transposon superfamily; FUNCTIONS IN: protein dimerization activity, DNA binding; INVOLVED IN: biological_process unknown; LOCATED IN: cellular_component unknown; CONTAINS InterPro DOMAIN/s: HAT dimerisation (InterPro:IPR008906), Zinc finger, BED-type predicted (InterPro:IPR003656), Protein of unknown function DUF659 (InterPro:IPR007021); BEST Arabidopsis thaliana protein match is: hAT transp…	Domain of unknown function DUF659 | HAT dimerisation domain, C-terminal | Ribonuclease H-like domain | Zinc finger, BED-type	NO
AT1G79790	3	1:30017906-30017971	-	RI	0.25499	0.14348	0.11151	0.982	K6	1.9149	Haloacid dehalogenase-like hydrolase (HAD) superfamily protein	Haloacid dehalogenase-like hydrolase (HAD) superfamily protein; FUNCTIONS IN: hydrolase activity; LOCATED IN: chloroplast; EXPRESSED IN: 23 plant structures; EXPRESSED DURING: 13 growth stages; CONTAINS InterPro DOMAIN/s: HAD-superfamily hydrolase, subfamily IA, variant 3 (InterPro:IPR006402)	HAD hydrolase, subfamily IA | HAD-like domain	NO
AT1G79920	11	1:30060162-30060165	-	AD	0.52925	0.41166	0.11759	0.973	K1	0.9996	Heat shock protein 70 (Hsp 70) family protein	Heat shock protein 70 (Hsp 70) family protein; FUNCTIONS IN: ATP binding; LOCATED IN: cell wall, plasma membrane; EXPRESSED IN: male gametophyte, guard cell, cultured cell, pollen tube; EXPRESSED DURING: L mature pollen stage, M germinated pollen stage; CONTAINS InterPro DOMAIN/s: Heat shock protein Hsp70 (InterPro:IPR001023), Heat shock protein 70 (InterPro:IPR013126); BEST Arabidopsis thaliana …		NO
AT1G79920	12	1:30060077-30060080	-	AA	0.47072	0.58881	-0.11809	0.973	K1	0.9996	Heat shock protein 70 (Hsp 70) family protein	Heat shock protein 70 (Hsp 70) family protein; FUNCTIONS IN: ATP binding; LOCATED IN: cell wall, plasma membrane; EXPRESSED IN: male gametophyte, guard cell, cultured cell, pollen tube; EXPRESSED DURING: L mature pollen stage, M germinated pollen stage; CONTAINS InterPro DOMAIN/s: Heat shock protein Hsp70 (InterPro:IPR001023), Heat shock protein 70 (InterPro:IPR013126); BEST Arabidopsis thaliana …		NO
AT1G79985	2	1:30084349-30084516	+	RI	0.30297	0.15563	0.14734	0.943	K3	1.8562	structural molecules protein;(source:Araport11)			NO
AT1G80000	7	1:30093079-30093160	+	RI	0.23228	0.44549	-0.21321	0.998	K2	1.1366	CASC3/Barentsz eIF4AIII binding	CASC3/Barentsz eIF4AIII binding; CONTAINS InterPro DOMAIN/s: CASC3/Barentsz eIF4AIII binding (InterPro:IPR018545); BEST Arabidopsis thaliana protein match is: CASC3/Barentsz eIF4AIII binding (TAIR:AT1G15280.2)	Btz domain	NO
AT1G80020	4	1:30103923-30104127	-	RI	0.39616	0.13427	0.26189	0.92	K1	0.9911	transposable element gene	hAT-like transposase family (hobo/Ac/Tam3), has a 5.0e-62 P-value blast match to GB:AAD24567 transposase Tag2 (hAT-element) (Arabidopsis thaliana)	HAT dimerisation domain, C-terminal | Ribonuclease H-like domain | Zinc finger, BED-type | hAT-like transposase, RNase-H fold	NO
AT1G80260	38	1:30179702-30179856	+	RI	0.1925	0.30213	-0.10963	0.978	K3	1.9256	Spc97 / Spc98 family of spindle pole body (SBP) component	embryo defective 1427 (emb1427); FUNCTIONS IN: tubulin binding; INVOLVED IN: embryo development ending in seed dormancy; LOCATED IN: spindle pole, microtubule organizing center; CONTAINS InterPro DOMAIN/s: Spc97/Spc98 (InterPro:IPR007259); BEST Arabidopsis thaliana protein match is: Spc97 / Spc98 family of spindle pole body (SBP) component (TAIR:AT1G20570.1)	Gamma-tubulin complex component protein	NO
AT1G80370	2	1:30213837-30214443	+	AD	0.54617	0.17262	0.37355	0.967	K1	0.9852	Cyclin A2;4	Cyclin A2;4 (CYCA2;4); CONTAINS InterPro DOMAIN/s: Cyclin, C-terminal (InterPro:IPR004367), Cyclin (InterPro:IPR006670), G2/mitotic-specific cyclin A (InterPro:IPR015453), Cyclin-like (InterPro:IPR011028), Cyclin-related (InterPro:IPR013763), Cyclin, N-terminal (InterPro:IPR006671), Cyclin, A/B/D/E (InterPro:IPR014400); BEST Arabidopsis thaliana protein match is: CYCLIN A2;3 (TAIR:AT1G15570.1)	Cyclin A, plant | Cyclin A/B/D/E/F | Cyclin, C-terminal domain | Cyclin, N-terminal | Cyclin-like	NO
AT1G80420	9	1:30237358-30237497	-	RI	0.30195	0.19606	0.10588	0.902	K2	1.672	BRCT domain-containing DNA repair protein	ATXRCC1; FUNCTIONS IN: transcription coactivator activity; INVOLVED IN: DNA repair; LOCATED IN: intracellular; EXPRESSED IN: 23 plant structures; EXPRESSED DURING: 13 growth stages; CONTAINS InterPro DOMAIN/s: BRCT (InterPro:IPR001357)	BRCT domain	NO
AT1G80650	7	1:30315441-30315470	+	AA	0.71892	0.82966	-0.11074	0.978	K2	1.7139	RNAse THREE-like protein 1	RNAse THREE-like protein 1 (RTL1); FUNCTIONS IN: double-stranded RNA binding, RNA binding; INVOLVED IN: biological_process unknown; LOCATED IN: intracellular; CONTAINS InterPro DOMAIN/s: Double-stranded RNA-binding (InterPro:IPR001159), Double-stranded RNA-binding-like (InterPro:IPR014720); BEST Arabidopsis thaliana protein match is: Double-stranded RNA-binding domain (DsRBD)-containing protein (…	Double-stranded RNA-binding domain	NO
AT1G80650	8	1:30315471-30315481	+	AA	0.74376	0.84412	-0.10036	0.967	K2	1.7139	RNAse THREE-like protein 1	RNAse THREE-like protein 1 (RTL1); FUNCTIONS IN: double-stranded RNA binding, RNA binding; INVOLVED IN: biological_process unknown; LOCATED IN: intracellular; CONTAINS InterPro DOMAIN/s: Double-stranded RNA-binding (InterPro:IPR001159), Double-stranded RNA-binding-like (InterPro:IPR014720); BEST Arabidopsis thaliana protein match is: Double-stranded RNA-binding domain (DsRBD)-containing protein (…	Double-stranded RNA-binding domain	NO
AT1G80770	4	1:30355354-30355423	+	RI	0.22796	0.12504	0.10292	0.926	K3	1.9108	P-loop containing nucleoside triphosphate hydrolases superfamily protein	pigment defective 318 (PDE318); FUNCTIONS IN: GTP binding; FUNCTIONS IN: ferrous iron transmembrane transporter activity, GTP binding; EXPRESSED IN: 21 plant structures; INVOLVED IN: ferrous iron transport; EXPRESSED DURING: 13 growth stages; LOCATED IN: integral to membrane; CONTAINS InterPro DOMAIN/s: GTP1/OBG (InterPro:IPR006073), Nucleolar GTP-binding 1 (InterPro:IPR010674); BEST Arabidopsis …	Ferrous iron transport protein B, N-terminal | GTP binding domain | Nucleolar GTP-binding protein 1, Rossman-fold domain | P-loop containing nucleoside triphosphate hydrolase	NO
AT1G80900	6	1:30399890-30400010	-	RI	0.81776	0.32935	0.48841	1	K1	0.9852	magnesium transporter 1	magnesium transporter 1 (MGT1); FUNCTIONS IN: magnesium ion transmembrane transporter activity, metal ion transmembrane transporter activity; INVOLVED IN: transmembrane transport, metal ion transport; LOCATED IN: membrane; EXPRESSED IN: 29 plant structures; EXPRESSED DURING: 13 growth stages; CONTAINS InterPro DOMAIN/s: Mg2+ transporter protein, CorA-like (InterPro:IPR002523); BEST Arabidopsis th…	Magnesium transporter MRS2/LPE10 | Mg2+ transporter protein, CorA-like/Zinc transport protein ZntB	NO
AT2G01170	4	2:104294-104361	-	RI	0.35649	0.18375	0.17274	0.94	K1	0.986	bidirectional amino acid transporter 1	bidirectional amino acid transporter 1 (BAT1); FUNCTIONS IN: arginine transmembrane transporter activity, L-lysine transmembrane transporter activity, L-alanine transmembrane transporter activity, L-glutamate transmembrane transporter activity; INVOLVED IN: amino acid transport, transport, transmembrane transport; INVOLVED IN: transport, amino acid transport, transmembrane transport; LOCATED IN: …	Amino acid permease subfamily | Amino acid/polyamine transporter I	NO
AT2G01450	20	2:200793-200947	-	RI	0.62527	0.77135	-0.14608	0.995	K1	0.9902	MAP kinase 17	MAP kinase 17 (MPK17); CONTAINS InterPro DOMAIN/s: MAP kinase, conserved site (InterPro:IPR003527), Protein kinase, ATP binding site (InterPro:IPR017441), Protein kinase, catalytic domain (InterPro:IPR000719), Serine/threonine-protein kinase domain (InterPro:IPR002290), Tyrosine-protein kinase, catalytic domain (InterPro:IPR020635), Serine/threonine-protein kinase-like domain (InterPro:IPR017442)…	Mitogen-activated protein (MAP) kinase, conserved site | Protein kinase domain | Protein kinase, ATP binding site | Protein kinase-like domain | Serine/threonine/dual specificity protein kinase, catalytic domain	NO
AT2G01490	19	2:223213-223427	+	RI	0.75414	0.85479	-0.10065	0.927	K1	0.8281	phytanoyl-CoA dioxygenase (PhyH) family protein	phytanoyl-CoA dioxygenase (PhyH) family protein; FUNCTIONS IN: phytanoyl-CoA dioxygenase activity; INVOLVED IN: N-terminal protein myristoylation; LOCATED IN: plasma membrane; EXPRESSED IN: 25 plant structures; EXPRESSED DURING: 15 growth stages; CONTAINS InterPro DOMAIN/s: Phytanoyl-CoA dioxygenase (InterPro:IPR008775)	Phytanoyl-CoA dioxygenase	NO
AT2G01735	5	2:325071-325080	+	AA	0.97553	0.86687	0.10866	0.938	K2	1.4864	RING-finger protein for embryogenesis	RING-finger protein for embryogenesis (RIE1); FUNCTIONS IN: zinc ion binding; LOCATED IN: chloroplast; EXPRESSED IN: 14 plant structures; EXPRESSED DURING: 4 anthesis, C globular stage, petal differentiation and expansion stage, E expanded cotyledon stage, D bilateral stage; CONTAINS InterPro DOMAIN/s: Zinc finger, RING-type (InterPro:IPR001841), Zinc finger, C3HC4 RING-type (InterPro:IPR018957);…	Zinc finger, RING-type | Zinc finger, RING/FYVE/PHD-type	NO
AT2G01830	13	2:367437-367553	-	RI	0.83581	0.52418	0.31163	0.948	K3	1.3609	CHASE domain containing histidine kinase protein	WOODEN LEG (WOL); FUNCTIONS IN: osmosensor activity, cytokine binding, cytokinin receptor activity, protein histidine kinase activity, phosphoprotein phosphatase activity; INVOLVED IN: in 7 processes; LOCATED IN: membrane; EXPRESSED IN: 30 plant structures; EXPRESSED DURING: 13 growth stages; CONTAINS InterPro DOMAIN/s: Signal transduction histidine kinase, homodimeric (InterPro:IPR009082), CHASE…	CHASE | CheY-like superfamily | Histidine kinase-like ATPase, C-terminal domain | Signal transduction histidine kinase EnvZ-like, dimerisation/phosphoacceptor domain | Signal transduction histidine kinase, core | Signal transduction histidine kinase, homodimeric domain | Signal transduction histidine kinase-related protein, C-terminal | Signal transduction response regulator, receiver domain	NO
AT2G01930	6	2:428224-428331	-	RI	0.58484	0.45251	0.13232	0.929	K1	0.9966	basic pentacysteine1	basic pentacysteine1 (BPC1); FUNCTIONS IN: DNA binding, sequence-specific DNA binding transcription factor activity, specific transcriptional repressor activity; INVOLVED IN: regulation of transcription, DNA-dependent; LOCATED IN: nucleus; EXPRESSED IN: 24 plant structures; EXPRESSED DURING: 15 growth stages; CONTAINS InterPro DOMAIN/s: GAGA binding-like (InterPro:IPR010409); BEST Arabidopsis tha…	GAGA-binding transcriptional activator	NO
AT2G01990	3	2:466512-466669	-	RI	0.18918	0.078306	0.11087	0.928	K1	0.7137		unknown protein; BEST Arabidopsis thaliana protein match is: unknown protein (TAIR:AT1G14630.1)		NO
AT2G02020	9	2:480236-480329	+	RI	0.70983	0.91941	-0.20958	0.908	K1	0.9957	Major facilitator superfamily protein	Major facilitator superfamily protein; FUNCTIONS IN: transporter activity; INVOLVED IN: oligopeptide transport; LOCATED IN: membrane; EXPRESSED IN: 6 plant structures; EXPRESSED DURING: LP.06 six leaves visible; CONTAINS InterPro DOMAIN/s: PTR2 family proton/oligopeptide symporter, conserved site (InterPro:IPR018456), Oligopeptide transporter (InterPro:IPR000109), Major facilitator superfamily, g…	Major facilitator superfamily domain, general substrate transporter | PTR2 family proton/oligopeptide symporter, conserved site | Proton-dependent oligopeptide transporter family	NO
AT2G02080	4	2:521433-521618	-	AD	0.88154	0.66369	0.21785	0.984	K2	1.6962	indeterminate(ID)-domain 4	indeterminate(ID)-domain 4 (IDD4); FUNCTIONS IN: sequence-specific DNA binding transcription factor activity; LOCATED IN: intracellular; LOCATED IN: intracellular, chloroplast; EXPRESSED IN: 20 plant structures; EXPRESSED DURING: 13 growth stages; CONTAINS InterPro DOMAIN/s: Zinc finger, C2H2-like (InterPro:IPR015880), Zinc finger, C2H2-type (InterPro:IPR007087), Zinc finger, double-stranded RNA …	Zinc finger C2H2-type/integrase DNA-binding domain | Zinc finger, C2H2 | Zinc finger, C2H2-like	NO
AT2G02080	6	2:521206-521362	-	RI	0.85859	0.26369	0.5949	1	K2	1.7018	indeterminate(ID)-domain 4	indeterminate(ID)-domain 4 (IDD4); FUNCTIONS IN: sequence-specific DNA binding transcription factor activity; LOCATED IN: intracellular; LOCATED IN: intracellular, chloroplast; EXPRESSED IN: 20 plant structures; EXPRESSED DURING: 13 growth stages; CONTAINS InterPro DOMAIN/s: Zinc finger, C2H2-like (InterPro:IPR015880), Zinc finger, C2H2-type (InterPro:IPR007087), Zinc finger, double-stranded RNA …	Zinc finger C2H2-type/integrase DNA-binding domain | Zinc finger, C2H2 | Zinc finger, C2H2-like	NO
AT2G02148	5	2:549319-549322	-	AA	0.85163	0.62428	0.22735	0.994	K3	1.9307		unknown protein	Zinc finger C2HC domain-containing protein	NO
AT2G02170	8	2:558660-558758	-	RI	0.6786	0.2924	0.38619	1	K1	0.9534	Remorin family protein	Remorin family protein; FUNCTIONS IN: DNA binding; INVOLVED IN: biological_process unknown; LOCATED IN: plasma membrane; EXPRESSED IN: 22 plant structures; EXPRESSED DURING: 13 growth stages; CONTAINS InterPro DOMAIN/s: Remorin, C-terminal (InterPro:IPR005516); BEST Arabidopsis thaliana protein match is: Remorin family protein (TAIR:AT1G30320.1)	Remorin, C-terminal	NO
AT2G02370	5	2:621375-621820	+	RI	0.45286	0.091069	0.36179	0.999	K1	0.9994	SNARE associated Golgi protein family	SNARE associated Golgi protein family; FUNCTIONS IN: molecular_function unknown; INVOLVED IN: biological_process unknown; LOCATED IN: cellular_component unknown; EXPRESSED IN: 22 plant structures; EXPRESSED DURING: 13 growth stages; CONTAINS InterPro DOMAIN/s: SNARE associated Golgi protein (InterPro:IPR015414); BEST Arabidopsis thaliana protein match is: SNARE associated Golgi protein family (TA…	SNARE associated Golgi protein	NO
AT2G02410	21	2:634261-634339	+	RI	0.16752	0.30238	-0.13486	0.919	K1	0.9607		unknown protein; FUNCTIONS IN: molecular_function unknown; INVOLVED IN: biological_process unknown; EXPRESSED IN: 21 plant structures; EXPRESSED DURING: 13 growth stages; CONTAINS InterPro DOMAIN/s: Protein of unknown function DUF901 (InterPro:IPR010298)	Protein of unknown function DUF901	NO
AT2G02570	6	2:699813-700246	-	RI	0.23876	0.3682	-0.12944	0.999	K2	1.4891	nucleic acid binding;RNA binding	nucleic acid binding;RNA binding; FUNCTIONS IN: RNA binding, nucleic acid binding; INVOLVED IN: mRNA processing; LOCATED IN: nucleus, cytoplasm; EXPRESSED IN: 24 plant structures; EXPRESSED DURING: 14 growth stages; CONTAINS InterPro DOMAIN/s: Tudor subgroup (InterPro:IPR018351), Tudor domain (InterPro:IPR002999), Survival motor neuron (InterPro:IPR010304)	Survival motor neuron | Tudor domain	NO
AT2G02800	2	2:798721-799183	-	RI	0.26944	0.02932	0.24012	1	K1	0.885	protein kinase 2B	protein kinase 2B (APK2B); FUNCTIONS IN: protein serine/threonine kinase activity, protein kinase activity, kinase activity, ATP binding; INVOLVED IN: protein amino acid phosphorylation; LOCATED IN: nucleus, plasma membrane, cytoplasm; EXPRESSED IN: 23 plant structures; EXPRESSED DURING: 13 growth stages; CONTAINS InterPro DOMAIN/s: Protein kinase, ATP binding site (InterPro:IPR017441), Protein k…	Protein kinase domain | Protein kinase, ATP binding site | Protein kinase-like domain | Serine-threonine/tyrosine-protein kinase catalytic domain | Serine/threonine-protein kinase, active site	NO
AT2G02870	4	2:838018-838145	+	RI	0.47936	0.094274	0.38508	0.998	K1	1	Galactose oxidase/kelch repeat superfamily protein	Galactose oxidase/kelch repeat superfamily protein; CONTAINS InterPro DOMAIN/s: Galactose oxidase/kelch, beta-propeller (InterPro:IPR011043), Kelch repeat type 1 (InterPro:IPR006652), Kelch related (InterPro:IPR013089), Kelch-type beta propeller (InterPro:IPR015915); BEST Arabidopsis thaliana protein match is: Galactose oxidase/kelch repeat superfamily protein (TAIR:AT1G14330.1)	Galactose oxidase, beta-propeller | Kelch repeat type 1	NO
AT2G02910	3	2:849389-849542	-	RI	0.82137	0.3562	0.46517	0.999	K3	1.1252	Protein of unknown function (DUF616)	Protein of unknown function (DUF616); CONTAINS InterPro DOMAIN/s: Protein of unknown function DUF616 (InterPro:IPR006852); BEST Arabidopsis thaliana protein match is: Protein of unknown function (DUF616) (TAIR:AT1G34550.1)	Protein of unknown function DUF616	NO
AT2G03150	14	2:953397-954134	+	CE	0.75195	0.53628	0.21567	0.979	K3	1.784	ATP/GTP-binding protein family	embryo defective 1579 (emb1579); FUNCTIONS IN: binding, calcium ion binding; INVOLVED IN: embryo development ending in seed dormancy; LOCATED IN: cytosol; EXPRESSED IN: 24 plant structures; EXPRESSED DURING: 14 growth stages; CONTAINS InterPro DOMAIN/s: EF-HAND 2 (InterPro:IPR018249), EF-hand-like domain (InterPro:IPR011992)	Cell cycle and apoptosis regulator protein | DBC1/CARP1 catalytically inactive NUDIX hydrolase domain | EF-hand domain | EF-hand domain pair	NO
AT2G03150	16	2:954231-954276	+	CE	0.75198	0.54567	0.20632	0.974	K3	1.784	ATP/GTP-binding protein family	embryo defective 1579 (emb1579); FUNCTIONS IN: binding, calcium ion binding; INVOLVED IN: embryo development ending in seed dormancy; LOCATED IN: cytosol; EXPRESSED IN: 24 plant structures; EXPRESSED DURING: 14 growth stages; CONTAINS InterPro DOMAIN/s: EF-HAND 2 (InterPro:IPR018249), EF-hand-like domain (InterPro:IPR011992)	Cell cycle and apoptosis regulator protein | DBC1/CARP1 catalytically inactive NUDIX hydrolase domain | EF-hand domain | EF-hand domain pair	NO
AT2G03480	6	2:1050980-1051230	+	RI	0.30108	0.032132	0.26895	1	K1	0.9433	QUASIMODO2 LIKE 2	QUASIMODO2 LIKE 2 (QUL2); LOCATED IN: mitochondrion; EXPRESSED IN: male gametophyte, pollen tube; EXPRESSED DURING: L mature pollen stage, M germinated pollen stage; CONTAINS InterPro DOMAIN/s: Protein of unknown function DUF248, methyltransferase putative (InterPro:IPR004159); BEST Arabidopsis thaliana protein match is: QUASIMODO2 LIKE 1 (TAIR:AT1G13860.3)	Putative S-adenosyl-L-methionine-dependent methyltransferase | S-adenosyl-L-methionine-dependent methyltransferase-like	NO
AT2G04039	4	2:1333566-1333639	+	RI	0.34944	0.20443	0.14501	0.957	K1	0.9748		unknown protein; FUNCTIONS IN: molecular_function unknown; LOCATED IN: chloroplast; EXPRESSED IN: 21 plant structures; EXPRESSED DURING: 13 growth stages; CONTAINS InterPro DOMAIN/s: Protein of unknown function DUF2996 (InterPro:IPR021374)	Protein of unknown function DUF2996	NO
AT2G04110	4	2:1382858-1383047	-	RI	0.87415	0.67262	0.20153	0.991	K2	1.1381		expressed protein		NO
AT2G04240	3	2:1462357-1462812	-	RI	0.22425	0.028469	0.19578	1	K1	0.7818	RING/U-box superfamily protein	XERICO; CONTAINS InterPro DOMAIN/s: Zinc finger, RING-type (InterPro:IPR001841), Zinc finger, C3HC4 RING-type (InterPro:IPR018957); BEST Arabidopsis thaliana protein match is: brassinosteroid-responsive RING-H2 (TAIR:AT3G61460.1)	Zinc finger, RING-type | Zinc finger, RING/FYVE/PHD-type	NO
AT2G04800	8	2:1687617-1687721	-	RI	0.71438	0.19874	0.51564	1	K2	1.0376		unknown protein; FUNCTIONS IN: molecular_function unknown; INVOLVED IN: N-terminal protein myristoylation; LOCATED IN: cellular_component unknown; EXPRESSED IN: hypocotyl, root		NO
AT2G05185	5	2:1877087-1877388	+	RI	0.84064	0.49868	0.34195	0.985	K2	1.4405		unknown protein; FUNCTIONS IN: molecular_function unknown; INVOLVED IN: biological_process unknown; LOCATED IN: chloroplast; BEST Arabidopsis thaliana protein match is: unknown protein (TAIR:AT5G22608.1); BEST Arabidopsis thaliana protein match is: unknown protein (TAIR:AT5G22608.3)		NO
AT2G05210	9	2:1891780-1891802	+	AA	0.6883	0.81114	-0.12285	0.917	K2	1.5292	Nucleic acid-binding, OB-fold-like protein	Protection of Telomeres 1a (AtPOT1a); CONTAINS InterPro DOMAIN/s: Nucleic acid-binding, OB-fold-like (InterPro:IPR016027), Nucleic acid-binding, OB-fold (InterPro:IPR012340), Telomere end binding protein (InterPro:IPR011564); BEST Arabidopsis thaliana protein match is: Nucleic acid-binding, OB-fold-like protein (TAIR:AT5G06310.1)	Nucleic acid-binding, OB-fold | Protection of telomeres protein 1 | Telomeric single stranded DNA binding POT1/Cdc13	NO
AT2G05440	10	2:1993724-1993729	+	EI/RI	0.34477	0.49655	-0.15178	0.981	K8	2.5775	GLYCINE RICH PROTEIN 9	GLYCINE RICH PROTEIN 9 (GRP9); FUNCTIONS IN: molecular_function unknown; INVOLVED IN: biological_process unknown; LOCATED IN: endomembrane system; CONTAINS InterPro DOMAIN/s: Glycine rich protein (InterPro:IPR010800); BEST Arabidopsis thaliana protein match is: Glycine-rich protein family (TAIR:AT2G05510.1); BEST Arabidopsis thaliana protein match is: Glycine-rich protein family (TAIR:AT2G05510.2…	Glycine rich protein	NO
AT2G05440	10	2:1993724-1993729	+	RI	0.34477	0.49655	-0.15178	0.981	K8	2.5775	GLYCINE RICH PROTEIN 9	GLYCINE RICH PROTEIN 9 (GRP9); FUNCTIONS IN: molecular_function unknown; INVOLVED IN: biological_process unknown; LOCATED IN: endomembrane system; CONTAINS InterPro DOMAIN/s: Glycine rich protein (InterPro:IPR010800); BEST Arabidopsis thaliana protein match is: Glycine-rich protein family (TAIR:AT2G05510.1); BEST Arabidopsis thaliana protein match is: Glycine-rich protein family (TAIR:AT2G05510.2…	Glycine rich protein	NO
AT2G05440	10	2:1993766-1993786	+	CE	0.086725	0.25096	-0.16423	0.928	K5	2.8326	GLYCINE RICH PROTEIN 9	GLYCINE RICH PROTEIN 9 (GRP9); FUNCTIONS IN: molecular_function unknown; INVOLVED IN: biological_process unknown; LOCATED IN: endomembrane system; CONTAINS InterPro DOMAIN/s: Glycine rich protein (InterPro:IPR010800); BEST Arabidopsis thaliana protein match is: Glycine-rich protein family (TAIR:AT2G05510.1); BEST Arabidopsis thaliana protein match is: Glycine-rich protein family (TAIR:AT2G05510.2…	Glycine rich protein	NO
AT2G05440	11	2:1993730-1993744	+	EI/CE	0.34462	0.49646	-0.15185	0.978	K8	2.5775	GLYCINE RICH PROTEIN 9	GLYCINE RICH PROTEIN 9 (GRP9); FUNCTIONS IN: molecular_function unknown; INVOLVED IN: biological_process unknown; LOCATED IN: endomembrane system; CONTAINS InterPro DOMAIN/s: Glycine rich protein (InterPro:IPR010800); BEST Arabidopsis thaliana protein match is: Glycine-rich protein family (TAIR:AT2G05510.1); BEST Arabidopsis thaliana protein match is: Glycine-rich protein family (TAIR:AT2G05510.2…	Glycine rich protein	NO
AT2G05440	13	2:1993745-1993765	+	EI/CE	0.28489	0.4448	-0.15991	0.966	K8	2.5775	GLYCINE RICH PROTEIN 9	GLYCINE RICH PROTEIN 9 (GRP9); FUNCTIONS IN: molecular_function unknown; INVOLVED IN: biological_process unknown; LOCATED IN: endomembrane system; CONTAINS InterPro DOMAIN/s: Glycine rich protein (InterPro:IPR010800); BEST Arabidopsis thaliana protein match is: Glycine-rich protein family (TAIR:AT2G05510.1); BEST Arabidopsis thaliana protein match is: Glycine-rich protein family (TAIR:AT2G05510.2…	Glycine rich protein	NO
AT2G05440	15	2:1993766-1993786	+	EI/CE	0.026791	0.31912	-0.29233	0.998	K7	2.5775	GLYCINE RICH PROTEIN 9	GLYCINE RICH PROTEIN 9 (GRP9); FUNCTIONS IN: molecular_function unknown; INVOLVED IN: biological_process unknown; LOCATED IN: endomembrane system; CONTAINS InterPro DOMAIN/s: Glycine rich protein (InterPro:IPR010800); BEST Arabidopsis thaliana protein match is: Glycine-rich protein family (TAIR:AT2G05510.1); BEST Arabidopsis thaliana protein match is: Glycine-rich protein family (TAIR:AT2G05510.2…	Glycine rich protein	NO
AT2G05440	28	2:1993886-1993891	+	EI/AA	0.15987	0.32545	-0.16557	0.951	K8	2.2932	GLYCINE RICH PROTEIN 9	GLYCINE RICH PROTEIN 9 (GRP9); FUNCTIONS IN: molecular_function unknown; INVOLVED IN: biological_process unknown; LOCATED IN: endomembrane system; CONTAINS InterPro DOMAIN/s: Glycine rich protein (InterPro:IPR010800); BEST Arabidopsis thaliana protein match is: Glycine-rich protein family (TAIR:AT2G05510.1); BEST Arabidopsis thaliana protein match is: Glycine-rich protein family (TAIR:AT2G05510.2…	Glycine rich protein	NO
AT2G05440	29	2:1993892-1993894	+	EI/AA	0.16717	0.34958	-0.18241	0.953	K8	2.2932	GLYCINE RICH PROTEIN 9	GLYCINE RICH PROTEIN 9 (GRP9); FUNCTIONS IN: molecular_function unknown; INVOLVED IN: biological_process unknown; LOCATED IN: endomembrane system; CONTAINS InterPro DOMAIN/s: Glycine rich protein (InterPro:IPR010800); BEST Arabidopsis thaliana protein match is: Glycine-rich protein family (TAIR:AT2G05510.1); BEST Arabidopsis thaliana protein match is: Glycine-rich protein family (TAIR:AT2G05510.2…	Glycine rich protein	NO
AT2G05510	14	2:2016433-2016465	+	AA	0.68361	0.85148	-0.16787	0.922	K4	1.0391	Glycine-rich protein family	Glycine-rich protein family; FUNCTIONS IN: molecular_function unknown; INVOLVED IN: biological_process unknown; LOCATED IN: endomembrane system; CONTAINS InterPro DOMAIN/s: Glycine rich protein (InterPro:IPR010800); BEST Arabidopsis thaliana protein match is: GLYCINE RICH PROTEIN 9 (TAIR:AT2G05440.1); BEST Arabidopsis thaliana protein match is: GLYCINE RICH PROTEIN 9 (TAIR:AT2G05440.6)	Glycine rich protein	NO
AT2G05518	4	2:2023458-2023544	+	RI	0.98466	0.60996	0.3747	1	K1	0.9869	other_RNA;(source:Araport11)			NO
AT2G05518	7	2:2023677-2023779	+	RI	0.97568	0.74531	0.23037	1	K1	0.8944	other_RNA;(source:Araport11)			NO
AT2G05520	6	2:2026611-2026628	+	AD	0.99995	0.75662	0.24332	1	K4	1.2687	glycine-rich protein 3	glycine-rich protein 3 (GRP-3); FUNCTIONS IN: molecular_function unknown; INVOLVED IN: response to ethylene stimulus, response to desiccation, response to abscisic acid stimulus, response to salicylic acid stimulus; LOCATED IN: endomembrane system; EXPRESSED IN: 22 plant structures; EXPRESSED DURING: 14 growth stages; CONTAINS InterPro DOMAIN/s: Glycine rich protein (InterPro:IPR010800); BEST Ara…	Glycine rich protein	NO
AT2G05520	7	2:2026611-2026628	+	EI/AD	0.97395	0.60375	0.3702	1	K5	1.8667	glycine-rich protein 3	glycine-rich protein 3 (GRP-3); FUNCTIONS IN: molecular_function unknown; INVOLVED IN: response to ethylene stimulus, response to desiccation, response to abscisic acid stimulus, response to salicylic acid stimulus; LOCATED IN: endomembrane system; EXPRESSED IN: 22 plant structures; EXPRESSED DURING: 14 growth stages; CONTAINS InterPro DOMAIN/s: Glycine rich protein (InterPro:IPR010800); BEST Ara…	Glycine rich protein	NO
AT2G05520	7	2:2026629-2026649	+	AD	0.99328	0.76293	0.23035	1	K4	1.2687	glycine-rich protein 3	glycine-rich protein 3 (GRP-3); FUNCTIONS IN: molecular_function unknown; INVOLVED IN: response to ethylene stimulus, response to desiccation, response to abscisic acid stimulus, response to salicylic acid stimulus; LOCATED IN: endomembrane system; EXPRESSED IN: 22 plant structures; EXPRESSED DURING: 14 growth stages; CONTAINS InterPro DOMAIN/s: Glycine rich protein (InterPro:IPR010800); BEST Ara…	Glycine rich protein	NO
AT2G05520	8	2:2026629-2026649	+	EI/AD	0.91962	0.63404	0.28558	0.991	K5	1.8621	glycine-rich protein 3	glycine-rich protein 3 (GRP-3); FUNCTIONS IN: molecular_function unknown; INVOLVED IN: response to ethylene stimulus, response to desiccation, response to abscisic acid stimulus, response to salicylic acid stimulus; LOCATED IN: endomembrane system; EXPRESSED IN: 22 plant structures; EXPRESSED DURING: 14 growth stages; CONTAINS InterPro DOMAIN/s: Glycine rich protein (InterPro:IPR010800); BEST Ara…	Glycine rich protein	NO
AT2G06050	4	2:2362074-2362126	-	AD	0.24281	0.12636	0.11645	0.941	K2	0.824	oxophytodienoate-reductase 3	oxophytodienoate-reductase 3 (OPR3); FUNCTIONS IN: 12-oxophytodienoate reductase activity; INVOLVED IN: response to jasmonic acid stimulus, response to fungus, jasmonic acid biosynthetic process, response to wounding, response to ozone; LOCATED IN: peroxisome; EXPRESSED IN: 24 plant structures; EXPRESSED IN: 25 plant structures; EXPRESSED DURING: 14 growth stages; CONTAINS InterPro DOMAIN/s: Aldo…	Aldolase-type TIM barrel | NADH:flavin oxidoreductase/NADH oxidase, N-terminal	NO
AT2G06050	5	2:2361984-2362073	-	RI	0.23526	0.11944	0.11582	0.958	K2	0.8233	oxophytodienoate-reductase 3	oxophytodienoate-reductase 3 (OPR3); FUNCTIONS IN: 12-oxophytodienoate reductase activity; INVOLVED IN: response to jasmonic acid stimulus, response to fungus, jasmonic acid biosynthetic process, response to wounding, response to ozone; LOCATED IN: peroxisome; EXPRESSED IN: 24 plant structures; EXPRESSED IN: 25 plant structures; EXPRESSED DURING: 14 growth stages; CONTAINS InterPro DOMAIN/s: Aldo…	Aldolase-type TIM barrel | NADH:flavin oxidoreductase/NADH oxidase, N-terminal	NO
AT2G07042	4	2:2921809-2922114	-	RI	0.89121	0.37869	0.51252	1	K5	3.7395	other RNA			NO
AT2G07042	5	2:2921694-2921808	-	CE	0.93485	0.43152	0.50333	1	K5	3.7395	other RNA			NO
AT2G07042	6	2:2921595-2921693	-	RI	0.60744	0.2704	0.33704	0.998	K5	3.7395	other RNA			NO
AT2G07042	7	2:2921549-2921594	-	CE	0.86871	0.33283	0.53588	1	K5	3.7395	other RNA			NO
AT2G07042	8	2:2921108-2921548	-	RI	0.53425	0.25421	0.28004	0.984	K5	3.7395	other RNA			NO
AT2G07042	9	2:2920974-2921107	-	CE	0.82723	0.38206	0.44517	1	K5	3.7395	other RNA			NO
AT2G11520	5	2:4618794-4619050	+	RI	0.21911	0.017779	0.20134	1	K2	0.8621	calmodulin-binding receptor-like cytoplasmic kinase 3	calmodulin-binding receptor-like cytoplasmic kinase 3 (CRCK3); FUNCTIONS IN: protein serine/threonine kinase activity, protein kinase activity, kinase activity, ATP binding; INVOLVED IN: protein amino acid phosphorylation; LOCATED IN: endomembrane system; EXPRESSED IN: 22 plant structures; EXPRESSED DURING: 13 growth stages; CONTAINS InterPro DOMAIN/s: Protein kinase, ATP binding site (InterPro:I…	Concanavalin A-like lectin/glucanase, subgroup | Protein kinase domain | Protein kinase, ATP binding site | Protein kinase-like domain | Serine-threonine/tyrosine-protein kinase catalytic domain | Serine/threonine-protein kinase, active site	NO
AT2G13100	6	2:5389910-5390117	+	RI	0.58817	0.13114	0.45703	1	K1	1	Major facilitator superfamily protein	Major facilitator superfamily protein; FUNCTIONS IN: sugar:hydrogen symporter activity; INVOLVED IN: carbohydrate transport, transmembrane transport; EXPRESSED IN: 23 plant structures; EXPRESSED DURING: 15 growth stages; CONTAINS InterPro DOMAIN/s: Major facilitator superfamily (InterPro:IPR020846), Major facilitator superfamily MFS-1 (InterPro:IPR011701), Major facilitator superfamily, general s…	Major facilitator superfamily | Major facilitator superfamily domain | Major facilitator superfamily domain, general substrate transporter | Sugar phosphate transporter	NO
AT2G13290	3	2:5511804-5511998	+	RI	0.19849	0.02926	0.16923	0.994	K1	0.7858	beta-1,4-N-acetylglucosaminyltransferase family protein	beta-1,4-N-acetylglucosaminyltransferase family protein; FUNCTIONS IN: transferase activity, transferring glycosyl groups, acetylglucosaminyltransferase activity; INVOLVED IN: protein amino acid N-linked glycosylation; LOCATED IN: endomembrane system, membrane; EXPRESSED IN: 14 plant structures; EXPRESSED DURING: 9 growth stages; CONTAINS InterPro DOMAIN/s: Glycosyl transferase, family 17 (InterP…	Glycosyl transferase, family 17 | Nucleotide-diphospho-sugar transferases	NO
AT2G13370	11	2:5553551-5553563	-	AA	0.69972	0.87787	-0.17815	0.915	K1	0.9366	chromatin remodeling 5	chromatin remodeling 5 (CHR5); FUNCTIONS IN: chromatin binding, helicase activity, DNA binding, nucleic acid binding, ATP binding; INVOLVED IN: chromatin assembly or disassembly; LOCATED IN: chromatin, nucleus; EXPRESSED IN: 26 plant structures; EXPRESSED DURING: 15 growth stages; CONTAINS InterPro DOMAIN/s: Chromo domain (InterPro:IPR000953), SNF2-related (InterPro:IPR000330), Homeodomain-like (…	Chromo domain | Chromo domain-like | Chromo domain/shadow | Domain of unknown function DUF4208 | Helicase, C-terminal | Helicase, superfamily 1/2, ATP-binding domain | P-loop containing nucleoside triphosphate hydrolase | SNF2-related	NO
AT2G13370	8	2:5555627-5555798	-	RI	0.56074	0.020671	0.54007	1	K3	1.5676	chromatin remodeling 5	chromatin remodeling 5 (CHR5); FUNCTIONS IN: chromatin binding, helicase activity, DNA binding, nucleic acid binding, ATP binding; INVOLVED IN: chromatin assembly or disassembly; LOCATED IN: chromatin, nucleus; EXPRESSED IN: 26 plant structures; EXPRESSED DURING: 15 growth stages; CONTAINS InterPro DOMAIN/s: Chromo domain (InterPro:IPR000953), SNF2-related (InterPro:IPR000330), Homeodomain-like (…	Chromo domain | Chromo domain-like | Chromo domain/shadow | Domain of unknown function DUF4208 | Helicase, C-terminal | Helicase, superfamily 1/2, ATP-binding domain | P-loop containing nucleoside triphosphate hydrolase | SNF2-related	NO
AT2G13650	8	2:5689627-5689953	-	RI	0.091599	0.20774	-0.11614	0.944	K4	1.9054	golgi nucleotide sugar transporter 1	golgi nucleotide sugar transporter 1 (GONST1); FUNCTIONS IN: GDP-mannose transmembrane transporter activity, nucleotide-sugar transmembrane transporter activity; INVOLVED IN: GDP-mannose transport; LOCATED IN: Golgi apparatus; EXPRESSED IN: 22 plant structures; EXPRESSED DURING: 13 growth stages; BEST Arabidopsis thaliana protein match is: golgi nucleotide sugar transporter 2 (TAIR:AT1G07290.1)		NO
AT2G14170	42	2:5977834-5977921	-	RI	0.084221	0.20496	-0.12074	0.925	K1	0.8999	aldehyde dehydrogenase 6B2	aldehyde dehydrogenase 6B2 (ALDH6B2); CONTAINS InterPro DOMAIN/s: Aldehyde/histidinol dehydrogenase (InterPro:IPR016161), Aldehyde dehydrogenase (InterPro:IPR015590), Aldehyde dehydrogenase, N-terminal (InterPro:IPR016162), Aldehyde dehydrogenase, conserved site (InterPro:IPR016160), Methylmalonate-semialdehyde dehydrogenase (InterPro:IPR010061); FUNCTIONS IN: 3-chloroallyl aldehyde dehydrogenase…	Aldehyde dehydrogenase domain | Aldehyde dehydrogenase, C-terminal | Aldehyde dehydrogenase, N-terminal | Aldehyde dehydrogenase, cysteine active site | Aldehyde/histidinol dehydrogenase | Methylmalonate-semialdehyde dehydrogenase	NO
AT2G14260	3	2:6043623-6043775	-	AD	0.3857	0.23557	0.15013	0.928	K2	0.9915	proline iminopeptidase	proline iminopeptidase (PIP); FUNCTIONS IN: aminopeptidase activity; INVOLVED IN: proteolysis; LOCATED IN: chloroplast; EXPRESSED IN: 25 plant structures; EXPRESSED DURING: 15 growth stages; CONTAINS InterPro DOMAIN/s: Peptidase S33, proline iminopeptidase 1 (InterPro:IPR005944), Peptidase S33, prolyl aminopeptidase (InterPro:IPR002410), Alpha/beta hydrolase fold-1 (InterPro:IPR000073)	Alpha/Beta hydrolase fold | Alpha/beta hydrolase fold-1 | Peptidase S33 | Proline iminopeptidase	NO
AT2G14260	4	2:6043535-6043622	-	RI	0.38465	0.21512	0.16954	0.937	K2	1.0001	proline iminopeptidase	proline iminopeptidase (PIP); FUNCTIONS IN: aminopeptidase activity; INVOLVED IN: proteolysis; LOCATED IN: chloroplast; EXPRESSED IN: 25 plant structures; EXPRESSED DURING: 15 growth stages; CONTAINS InterPro DOMAIN/s: Peptidase S33, proline iminopeptidase 1 (InterPro:IPR005944), Peptidase S33, prolyl aminopeptidase (InterPro:IPR002410), Alpha/beta hydrolase fold-1 (InterPro:IPR000073)	Alpha/Beta hydrolase fold | Alpha/beta hydrolase fold-1 | Peptidase S33 | Proline iminopeptidase	NO
AT2G14530	8	2:6188024-6188028	+	AA	0.51461	0.32544	0.18917	0.957	K2	1.7819	TRICHOME BIREFRINGENCE-LIKE 13	TRICHOME BIREFRINGENCE-LIKE 13 (TBL13); INVOLVED IN: biological_process unknown; LOCATED IN: endomembrane system; EXPRESSED IN: 21 plant structures; EXPRESSED DURING: 13 growth stages; CONTAINS InterPro DOMAIN/s: Protein of unknown function DUF231, plant (InterPro:IPR004253); BEST Arabidopsis thaliana protein match is: Plant protein of unknown function (DUF828) (TAIR:AT5G64470.2)	PC-Esterase | PMR5 N-terminal domain	NO
AT2G15080	5	2:6535562-6535702	+	EI/RI	0.86639	0.9839	-0.11751	0.97	K1	0.6665	receptor like protein 19	receptor like protein 19 (RLP19); FUNCTIONS IN: kinase activity; INVOLVED IN: signal transduction, defense response; LOCATED IN: endomembrane system; EXPRESSED IN: 10 plant structures; EXPRESSED DURING: 9 growth stages; CONTAINS InterPro DOMAIN/s: Leucine-rich repeat-containing N-terminal domain, type 2 (InterPro:IPR013210), Leucine-rich repeat (InterPro:IPR001611); BEST Arabidopsis thaliana prot…	Leucine-rich repeat | Leucine-rich repeat-containing N-terminal, type 2	NO
AT2G15080	5	2:6535562-6535702	+	RI	0.86639	0.9839	-0.11751	0.97	K1	0.6665	receptor like protein 19	receptor like protein 19 (RLP19); FUNCTIONS IN: kinase activity; INVOLVED IN: signal transduction, defense response; LOCATED IN: endomembrane system; EXPRESSED IN: 10 plant structures; EXPRESSED DURING: 9 growth stages; CONTAINS InterPro DOMAIN/s: Leucine-rich repeat-containing N-terminal domain, type 2 (InterPro:IPR013210), Leucine-rich repeat (InterPro:IPR001611); BEST Arabidopsis thaliana prot…	Leucine-rich repeat | Leucine-rich repeat-containing N-terminal, type 2	NO
AT2G15530	7	2:6773164-6773254	+	RI	0.26537	0.07578	0.18959	0.987	K3	2.2532	RING/U-box superfamily protein	RING/U-box superfamily protein; FUNCTIONS IN: zinc ion binding; EXPRESSED IN: 23 plant structures; EXPRESSED DURING: 13 growth stages; CONTAINS InterPro DOMAIN/s: Zinc finger, RING-type (InterPro:IPR001841), Zinc finger, C3HC4 RING-type (InterPro:IPR018957); BEST Arabidopsis thaliana protein match is: RING/U-box superfamily protein (TAIR:AT4G34040.1)	Zinc finger, RING-type | Zinc finger, RING/FYVE/PHD-type	NO
AT2G15530	7	2:6773255-6773392	+	CE	0.48446	0.25886	0.22561	0.961	K1	0.9972	RING/U-box superfamily protein	RING/U-box superfamily protein; FUNCTIONS IN: zinc ion binding; EXPRESSED IN: 23 plant structures; EXPRESSED DURING: 13 growth stages; CONTAINS InterPro DOMAIN/s: Zinc finger, RING-type (InterPro:IPR001841), Zinc finger, C3HC4 RING-type (InterPro:IPR018957); BEST Arabidopsis thaliana protein match is: RING/U-box superfamily protein (TAIR:AT4G34040.1)	Zinc finger, RING-type | Zinc finger, RING/FYVE/PHD-type	NO
AT2G15530	9	2:6773393-6773916	+	RI	0.30571	0.049485	0.25623	0.999	K3	2.2532	RING/U-box superfamily protein	RING/U-box superfamily protein; FUNCTIONS IN: zinc ion binding; EXPRESSED IN: 23 plant structures; EXPRESSED DURING: 13 growth stages; CONTAINS InterPro DOMAIN/s: Zinc finger, RING-type (InterPro:IPR001841), Zinc finger, C3HC4 RING-type (InterPro:IPR018957); BEST Arabidopsis thaliana protein match is: RING/U-box superfamily protein (TAIR:AT4G34040.1)	Zinc finger, RING-type | Zinc finger, RING/FYVE/PHD-type	NO
AT2G16365	5	2:7074603-7074894	+	RI	0.85936	0.29597	0.56339	1	K2	1.581	F-box family protein	F-box family protein; BEST Arabidopsis thaliana protein match is: unknown protein (TAIR:AT4G34550.1); FUNCTIONS IN: molecular_function unknown; INVOLVED IN: response to karrikin; LOCATED IN: cellular_component unknown; EXPRESSED IN: 22 plant structures; EXPRESSED DURING: 13 growth stages; CONTAINS InterPro DOMAIN/s: F-box domain, cyclin-like (InterPro:IPR001810); BEST Arabidopsis thaliana protein…	F-box domain	NO
AT2G16640	3	2:7215307-7215479	-	AD	0.24064	0.12804	0.1126	0.922	K2	0.8775	multimeric translocon complex in the outer envelope membrane 132	multimeric translocon complex in the outer envelope membrane 132 (TOC132); FUNCTIONS IN: transmembrane receptor activity; INVOLVED IN: protein targeting to chloroplast; LOCATED IN: chloroplast outer membrane, membrane; EXPRESSED IN: 24 plant structures; EXPRESSED DURING: 13 growth stages; CONTAINS InterPro DOMAIN/s: Chloroplast protein import component Toc86/159 (InterPro:IPR005690), AIG1 (InterP…	AIG1 | Chloroplast protein import component Toc86/159 | Domain of unknown function DUF3406, chloroplast translocase | P-loop containing nucleoside triphosphate hydrolase	NO
AT2G16640	4	2:7215127-7215306	-	RI	0.93358	0.47988	0.4537	0.985	K1	0.971	multimeric translocon complex in the outer envelope membrane 132	multimeric translocon complex in the outer envelope membrane 132 (TOC132); FUNCTIONS IN: transmembrane receptor activity; INVOLVED IN: protein targeting to chloroplast; LOCATED IN: chloroplast outer membrane, membrane; EXPRESSED IN: 24 plant structures; EXPRESSED DURING: 13 growth stages; CONTAINS InterPro DOMAIN/s: Chloroplast protein import component Toc86/159 (InterPro:IPR005690), AIG1 (InterP…	AIG1 | Chloroplast protein import component Toc86/159 | Domain of unknown function DUF3406, chloroplast translocase | P-loop containing nucleoside triphosphate hydrolase	NO
AT2G16990	18	2:7383075-7383169	+	RI	0.59953	0.88728	-0.28774	0.987	K1	0.9978	Major facilitator superfamily protein	Major facilitator superfamily protein; FUNCTIONS IN: tetracycline transporter activity; INVOLVED IN: transmembrane transport; LOCATED IN: endomembrane system; EXPRESSED IN: 22 plant structures; EXPRESSED DURING: 13 growth stages; CONTAINS InterPro DOMAIN/s: Major facilitator superfamily MFS-1 (InterPro:IPR011701), Major facilitator superfamily, general substrate transporter (InterPro:IPR016196); …	Major facilitator superfamily | Major facilitator superfamily domain, general substrate transporter	NO
AT2G17033	8	2:7401394-7401632	+	RI	0.18528	0.074154	0.11113	0.95	K4	2.4321	pentatricopeptide (PPR) repeat-containing protein	pentatricopeptide (PPR) repeat-containing protein; CONTAINS InterPro DOMAIN/s: Pentatricopeptide repeat (InterPro:IPR002885), Smr protein/MutS2 C-terminal (InterPro:IPR002625); BEST Arabidopsis thaliana protein match is: Pentatricopeptide repeat (PPR) superfamily protein (TAIR:AT5G48730.1)	Pentatricopeptide repeat | Smr protein/MutS2 C-terminal	NO
AT2G17036	4	2:7405058-7405134	+	RI	0.075969	0.24698	-0.17101	0.908	K1	0.8631	F-box family protein with a domain of unknown function (DUF295)	CONTAINS InterPro DOMAIN/s: F-box domain, cyclin-like (InterPro:IPR001810), Protein of unknown function DUF295 (InterPro:IPR005174); BEST Arabidopsis thaliana protein match is: F-box family protein with a domain of unknown function (DUF295) (TAIR:AT2G17030.1)		NO
AT2G17150	6	2:7470695-7470873	-	RI	0.42703	0.074818	0.35222	0.998	K2	1.2519	Plant regulator RWP-RK family protein	Plant regulator RWP-RK family protein; CONTAINS InterPro DOMAIN/s: Octicosapeptide/Phox/Bem1p (InterPro:IPR000270), Plant regulator RWP-RK (InterPro:IPR003035); FUNCTIONS IN: sequence-specific DNA binding transcription factor activity; EXPRESSED IN: 22 plant structures; EXPRESSED DURING: 13 growth stages; BEST Arabidopsis thaliana protein match is: Plant regulator RWP-RK family protein (TAIR:AT4G…	Phox/Bem1p | RWP-RK domain	NO
AT2G17320	9	2:7535413-7535724	-	RI	0.6928	0.38043	0.31237	1	K1	0.9722	Uncharacterised conserved protein (UCP030210)	Uncharacterised conserved protein (UCP030210); CONTAINS InterPro DOMAIN/s: Domain of unknown function DUF89 (InterPro:IPR002791), Uncharacterised conserved protein UCP030210 (InterPro:IPR016949); BEST Arabidopsis thaliana protein match is: Uncharacterised conserved protein (UCP030210) (TAIR:AT2G17340.1)	Domain of unknown function DUF89 | Uncharacterised conserved protein UCP030210	NO
AT2G17340	6	2:7543567-7543919	-	RI	0.42537	0.1795	0.24587	0.997	K1	0.9998	Uncharacterised conserved protein (UCP030210)	Uncharacterised conserved protein (UCP030210); CONTAINS InterPro DOMAIN/s: Domain of unknown function DUF89 (InterPro:IPR002791), Uncharacterised conserved protein UCP030210 (InterPro:IPR016949); BEST Arabidopsis thaliana protein match is: Uncharacterised conserved protein (UCP030210) (TAIR:AT4G35360.1)	Domain of unknown function DUF89 | Uncharacterised conserved protein UCP030210	NO
AT2G17442	8	2:7575174-7575204	-	AA	0.84531	0.43513	0.41018	0.999	K2	1.3815		unknown protein; FUNCTIONS IN: molecular_function unknown; INVOLVED IN: biological_process unknown; LOCATED IN: mitochondrion		NO
AT2G17540	6	2:7631548-7631743	-	RI	0.58243	0.23677	0.34566	0.944	K3	1.7179		unknown protein; FUNCTIONS IN: molecular_function unknown; INVOLVED IN: biological_process unknown; LOCATED IN: chloroplast; EXPRESSED IN: 21 plant structures; EXPRESSED DURING: 13 growth stages; BEST Arabidopsis thaliana protein match is: unknown protein (TAIR:AT4G35510.1)		NO
AT2G17540	7	2:7631508-7631532	-	AA	0.46452	0.21837	0.24614	0.946	K2	1.712		unknown protein; FUNCTIONS IN: molecular_function unknown; INVOLVED IN: biological_process unknown; LOCATED IN: chloroplast; EXPRESSED IN: 21 plant structures; EXPRESSED DURING: 13 growth stages; BEST Arabidopsis thaliana protein match is: unknown protein (TAIR:AT4G35510.1)		NO
AT2G17787	4	2:7731730-7731855	+	RI	0.30649	0.04552	0.26097	0.997	K2	1.0875		unknown protein; BEST Arabidopsis thaliana protein match is: unknown protein (TAIR:AT4G35940.2)		NO
AT2G17800	4	2:7740184-7740268	+	RI	0.95896	0.81535	0.14362	0.968	K2	0.8676	Arabidopsis RAC-like 1	Arabidopsis RAC-like 1 (ARAC1); FUNCTIONS IN: GTP binding; INVOLVED IN: auxin mediated signaling pathway, abscisic acid mediated signaling pathway; LOCATED IN: nucleus, cytoplasm, phragmoplast, spindle; EXPRESSED IN: 24 plant structures; EXPRESSED DURING: 15 growth stages; CONTAINS InterPro DOMAIN/s: Ras GTPase (InterPro:IPR001806), Small GTP-binding protein (InterPro:IPR005225), Ras (InterPro:IP…	P-loop containing nucleoside triphosphate hydrolase | Small GTP-binding protein domain | Small GTPase superfamily | Small GTPase superfamily, Rho type	NO
AT2G17970	11	2:7820859-7820931	-	RI	0.34195	0.17415	0.1678	0.932	K3	2.4941	2-oxoglutarate (2OG) and Fe(II)-dependent oxygenase superfamily protein	2-oxoglutarate (2OG) and Fe(II)-dependent oxygenase superfamily protein; FUNCTIONS IN: oxidoreductase activity; INVOLVED IN: biological_process unknown; LOCATED IN: cellular_component unknown; EXPRESSED IN: 15 plant structures; EXPRESSED DURING: 7 growth stages; CONTAINS InterPro DOMAIN/s: Oxoglutarate/iron-dependent oxygenase (InterPro:IPR005123); BEST Arabidopsis thaliana protein match is: oxid…	Alpha-ketoglutarate-dependent dioxygenase AlkB-like | Oxoglutarate/iron-dependent dioxygenase	NO
AT2G18245	4	2:7937982-7937985	+	AD	0.50136	0.34713	0.15422	0.941	K2	1.4646	alpha/beta-Hydrolases superfamily protein	alpha/beta-Hydrolases superfamily protein; CONTAINS InterPro DOMAIN/s: Protein of unknown function DUF829, transmembrane 53 (InterPro:IPR008547); BEST Arabidopsis thaliana protein match is: alpha/beta-Hydrolases superfamily protein (TAIR:AT3G19970.1)	Alpha/Beta hydrolase fold | Protein of unknown function DUF829, TMEM53	NO
AT2G18245	5	2:7937986-7938099	+	RI	0.37097	0.15917	0.2118	0.99	K2	1.4646	alpha/beta-Hydrolases superfamily protein	alpha/beta-Hydrolases superfamily protein; CONTAINS InterPro DOMAIN/s: Protein of unknown function DUF829, transmembrane 53 (InterPro:IPR008547); BEST Arabidopsis thaliana protein match is: alpha/beta-Hydrolases superfamily protein (TAIR:AT3G19970.1)	Alpha/Beta hydrolase fold | Protein of unknown function DUF829, TMEM53	NO
AT2G18750	3	2:8125595-8125710	+	AD	0.78721	0.4864	0.30081	1	K2	1.4577	Calmodulin-binding protein	Calmodulin-binding protein; FUNCTIONS IN: calmodulin binding; INVOLVED IN: biological_process unknown; LOCATED IN: cellular_component unknown; EXPRESSED IN: 22 plant structures; EXPRESSED DURING: 13 growth stages; CONTAINS InterPro DOMAIN/s: Calmodulin binding protein-like (InterPro:IPR012416); BEST Arabidopsis thaliana protein match is: Calmodulin-binding protein (TAIR:AT5G57580.1)	Calmodulin binding protein-like	NO
AT2G18750	4	2:8125711-8125801	+	RI	0.72102	0.34157	0.37945	1	K2	1.4577	Calmodulin-binding protein	Calmodulin-binding protein; FUNCTIONS IN: calmodulin binding; INVOLVED IN: biological_process unknown; LOCATED IN: cellular_component unknown; EXPRESSED IN: 22 plant structures; EXPRESSED DURING: 13 growth stages; CONTAINS InterPro DOMAIN/s: Calmodulin binding protein-like (InterPro:IPR012416); BEST Arabidopsis thaliana protein match is: Calmodulin-binding protein (TAIR:AT5G57580.1)	Calmodulin binding protein-like	NO
AT2G18770	3	2:8134740-8134964	+	RI	0.23818	0.069431	0.16875	0.966	K1	0.8896	P-loop containing nucleoside triphosphate hydrolases superfamily protein	P-loop containing nucleoside triphosphate hydrolases superfamily protein; CONTAINS InterPro DOMAIN/s: Signal recognition particle receptor, beta subunit (InterPro:IPR019009); BEST Arabidopsis thaliana protein match is: signal recognition particle binding (TAIR:AT5G05670.1)	P-loop containing nucleoside triphosphate hydrolase | Signal recognition particle receptor, beta subunit	NO
AT2G18950	14	2:8208947-8208950	+	AD	0.13583	0.024655	0.11117	0.999	K1	0.6338	homogentisate phytyltransferase 1	homogentisate phytyltransferase 1 (HPT1); CONTAINS InterPro DOMAIN/s: UbiA prenyltransferase (InterPro:IPR000537); BEST Arabidopsis thaliana protein match is: homogentisate prenyltransferase (TAIR:AT3G11945.1)	UbiA prenyltransferase family	NO
AT2G19170	6	2:8317674-8317771	-	RI	0.16661	0.060768	0.10585	0.926	K1	0.6611	subtilisin-like serine protease 3	subtilisin-like serine protease 3 (SLP3); FUNCTIONS IN: serine-type peptidase activity; INVOLVED IN: proteolysis, negative regulation of catalytic activity; LOCATED IN: middle lamella-containing extracellular matrix; EXPRESSED IN: 22 plant structures; EXPRESSED DURING: 13 growth stages; CONTAINS InterPro DOMAIN/s: Protease-associated PA (InterPro:IPR003137), Proteinase inhibitor, propeptide (Inte…	Peptidase S8, subtilisin, Asp-active site | Peptidase S8, subtilisin, Ser-active site | Peptidase S8, subtilisin-related | Peptidase S8/S53 domain | Peptidase S8A, DUF1034 C-terminal | Protease-associated domain, PA | Proteinase inhibitor I9 | Proteinase inhibitor, propeptide	NO
AT2G19260	2	2:8356306-8356529	+	AD	0.5034	0.16929	0.33411	0.918	K1	0.9957	RING/FYVE/PHD zinc finger superfamily protein	RING/FYVE/PHD zinc finger superfamily protein; FUNCTIONS IN: DNA binding, zinc ion binding; INVOLVED IN: regulation of transcription, DNA-dependent; LOCATED IN: cellular_component unknown; CONTAINS InterPro DOMAIN/s: Zinc finger, PHD-type, conserved site (InterPro:IPR019786), Zinc finger, PHD-type (InterPro:IPR001965), Zinc finger, FYVE/PHD-type (InterPro:IPR011011), Zinc finger, CW-type (InterPr…	Zinc finger, CW-type | Zinc finger, FYVE/PHD-type | Zinc finger, PHD-finger | Zinc finger, PHD-type | Zinc finger, PHD-type, conserved site | Zinc finger, RING/FYVE/PHD-type	NO
AT2G19260	3	2:8356530-8357207	+	RI	0.55735	0.089072	0.46828	0.988	K2	1.0223	RING/FYVE/PHD zinc finger superfamily protein	RING/FYVE/PHD zinc finger superfamily protein; FUNCTIONS IN: DNA binding, zinc ion binding; INVOLVED IN: regulation of transcription, DNA-dependent; LOCATED IN: cellular_component unknown; CONTAINS InterPro DOMAIN/s: Zinc finger, PHD-type, conserved site (InterPro:IPR019786), Zinc finger, PHD-type (InterPro:IPR001965), Zinc finger, FYVE/PHD-type (InterPro:IPR011011), Zinc finger, CW-type (InterPr…	Zinc finger, CW-type | Zinc finger, FYVE/PHD-type | Zinc finger, PHD-finger | Zinc finger, PHD-type | Zinc finger, PHD-type, conserved site | Zinc finger, RING/FYVE/PHD-type	NO
AT2G19800	3	2:8533177-8533323	-	RI	0.34251	0.043691	0.29881	1	K1	0.9607	myo-inositol oxygenase 2	myo-inositol oxygenase 2 (MIOX2); FUNCTIONS IN: inositol oxygenase activity; INVOLVED IN: syncytium formation; LOCATED IN: cytoplasm; EXPRESSED IN: 24 plant structures; EXPRESSED DURING: 14 growth stages; CONTAINS InterPro DOMAIN/s: Protein of unknown function DUF706 (InterPro:IPR007828); BEST Arabidopsis thaliana protein match is: myo-inositol oxygenase 4 (TAIR:AT4G26260.2)	Inositol oxygenase	NO
AT2G20100	4	2:8678484-8678729	+	RI	0.31758	0.060617	0.25697	0.995	K1	0.9641	basic helix-loop-helix (bHLH) DNA-binding superfamily protein	basic helix-loop-helix (bHLH) DNA-binding superfamily protein; FUNCTIONS IN: transcription regulator activity; INVOLVED IN: regulation of transcription; LOCATED IN: nucleus; EXPRESSED IN: 19 plant structures; EXPRESSED DURING: 6 growth stages; CONTAINS InterPro DOMAIN/s: Helix-loop-helix DNA-binding (InterPro:IPR011598); CONTAINS InterPro DOMAIN/s: Helix-loop-helix DNA-binding domain (InterPro:IP…	Myc-type, basic helix-loop-helix (bHLH) domain	NO
AT2G20210	21	2:8722092-8722227	-	CE	0.86817	0.96841	-0.10025	0.97	K2	1.1912	RNI-like superfamily protein	RNI-like superfamily protein; LOCATED IN: endomembrane system; EXPRESSED IN: 12 plant structures; EXPRESSED DURING: 4 anthesis, F mature embryo stage, petal differentiation and expansion stage, E expanded cotyledon stage, D bilateral stage; CONTAINS InterPro DOMAIN/s: Leucine-rich repeat, ribonuclease inhibitor subtype (InterPro:IPR003590)		NO
AT2G20815	3	2:8960042-8960128	+	EI/RI	0.77488	0.47835	0.29653	0.906	K1	0.994	Family of unknown function (DUF566)	Family of unknown function (DUF566) ; FUNCTIONS IN: molecular_function unknown; INVOLVED IN: biological_process unknown; CONTAINS InterPro DOMAIN/s: Protein of unknown function DUF566 (InterPro:IPR007573); LOCATED IN: chloroplast; BEST Arabidopsis thaliana protein match is: Family of unknown function (DUF566) (TAIR:AT2G20616.1)	Protein of unknown function DUF566	NO
AT2G20815	3	2:8960042-8960128	+	RI	0.77488	0.47835	0.29653	0.906	K1	0.994	Family of unknown function (DUF566)	Family of unknown function (DUF566) ; FUNCTIONS IN: molecular_function unknown; INVOLVED IN: biological_process unknown; CONTAINS InterPro DOMAIN/s: Protein of unknown function DUF566 (InterPro:IPR007573); LOCATED IN: chloroplast; BEST Arabidopsis thaliana protein match is: Family of unknown function (DUF566) (TAIR:AT2G20616.1)	Protein of unknown function DUF566	NO
AT2G21188	2	2:9079226-9079352	-	RI	0.95562	0.60523	0.35039	0.994	K1	0.9928	other RNA			NO
AT2G21230	3	2:9096069-9096216	-	RI	0.10895	0.28766	-0.17872	0.978	K1	0.9362	Basic-leucine zipper (bZIP) transcription factor family protein	Basic-leucine zipper (bZIP) transcription factor family protein; FUNCTIONS IN: DNA binding, sequence-specific DNA binding transcription factor activity; INVOLVED IN: regulation of transcription, DNA-dependent; LOCATED IN: chloroplast; EXPRESSED IN: 23 plant structures; EXPRESSED DURING: 13 growth stages; CONTAINS InterPro DOMAIN/s: Basic-leucine zipper (bZIP) transcription factor (InterPro:IPR004…	Basic-leucine zipper domain	NO
AT2G21380	8	2:9141709-9141791	+	RI	0.39651	0.055632	0.34088	0.999	K1	0.9887	Kinesin motor family protein	Kinesin motor family protein; FUNCTIONS IN: microtubule motor activity, zinc ion binding, ATP binding; INVOLVED IN: microtubule-based movement; LOCATED IN: chloroplast; EXPRESSED IN: 23 plant structures; EXPRESSED DURING: 13 growth stages; CONTAINS InterPro DOMAIN/s: Kinesin, motor region, conserved site (InterPro:IPR019821), Zinc finger, RING-type (InterPro:IPR001841), Kinesin, motor domain (Int…	Kinesin, motor domain | Kinesin, motor region, conserved site | Kinesin-like protein | P-loop containing nucleoside triphosphate hydrolase | Zinc finger, RING-type | Zinc finger, RING/FYVE/PHD-type	NO
AT2G21520	5	2:9215990-9216207	+	RI	0.37709	0.024583	0.35251	1	K2	1.5843	Sec14p-like phosphatidylinositol transfer family protein	Sec14p-like phosphatidylinositol transfer family protein; FUNCTIONS IN: transporter activity; INVOLVED IN: transport; LOCATED IN: intracellular; EXPRESSED IN: 23 plant structures; EXPRESSED DURING: 15 growth stages; CONTAINS InterPro DOMAIN/s: Cellular retinaldehyde-binding/triple function, C-terminal (InterPro:IPR001251), Cellular retinaldehyde-binding/triple function, N-terminal (InterPro:IPR00…	CRAL-TRIO domain | CRAL/TRIO, N-terminal domain | Cellular retinaldehyde binding/alpha-tocopherol transport	NO
AT2G21550	10	2:9229724-9229847	+	CE	0.99071	0.87934	0.11137	0.946	K0	0	Bifunctional dihydrofolate reductase/thymidylate synthase	Bifunctional dihydrofolate reductase/thymidylate synthase; FUNCTIONS IN: thymidylate synthase activity, dihydrofolate reductase activity; INVOLVED IN: oxidation reduction, glycine biosynthetic process, one-carbon metabolic process, nucleotide biosynthetic process, dTMP biosynthetic process; EXPRESSED IN: stem, hypocotyl, root; CONTAINS InterPro DOMAIN/s: Dihydrofolate reductase domain (InterPro:I…	Bifunctional dihydrofolate reductase/thymidylate synthase | Dihydrofolate reductase conserved site | Dihydrofolate reductase domain | Dihydrofolate reductase-like domain | Thymidylate synthase | Thymidylate synthase/dCMP hydroxymethylase domain	NO
AT2G21590	7	2:9238646-9238761	+	AD	0.89516	0.52291	0.37225	0.995	K4	2.6256	Glucose-1-phosphate adenylyltransferase family protein	APL4; CONTAINS InterPro DOMAIN/s: ADP-glucose pyrophosphorylase, conserved site (InterPro:IPR005836), Glucose-1-phosphate adenylyltransferase (InterPro:IPR011831), Nucleotidyl transferase (InterPro:IPR005835); CONTAINS InterPro DOMAIN/s: Glucose-1-phosphate adenylyltransferase (InterPro:IPR011831), ADP-glucose pyrophosphorylase, conserved site (InterPro:IPR005836), Nucleotidyl transferase (InterP…	ADP-glucose pyrophosphorylase, conserved site | Glucose-1-phosphate adenylyltransferase | Nucleotide-diphospho-sugar transferases | Nucleotidyl transferase | Trimeric LpxA-like	NO
AT2G21590	9	2:9238932-9239032	+	RI	0.88388	0.24303	0.64086	1	K4	2.6256	Glucose-1-phosphate adenylyltransferase family protein	APL4; CONTAINS InterPro DOMAIN/s: ADP-glucose pyrophosphorylase, conserved site (InterPro:IPR005836), Glucose-1-phosphate adenylyltransferase (InterPro:IPR011831), Nucleotidyl transferase (InterPro:IPR005835); CONTAINS InterPro DOMAIN/s: Glucose-1-phosphate adenylyltransferase (InterPro:IPR011831), ADP-glucose pyrophosphorylase, conserved site (InterPro:IPR005836), Nucleotidyl transferase (InterP…	ADP-glucose pyrophosphorylase, conserved site | Glucose-1-phosphate adenylyltransferase | Nucleotide-diphospho-sugar transferases | Nucleotidyl transferase | Trimeric LpxA-like	NO
AT2G21660	22	2:9265575-9265583	-	CE	0.35863	0.57306	-0.21443	0.96	K8	2.0676	cold, circadian rhythm, and rna binding 2	cold, circadian rhythm, and rna binding 2 (CCR2); GLYCINE RICH PROTEIN 7 (ATGRP7); FUNCTIONS IN: double-stranded DNA binding, RNA binding, single-stranded DNA binding; INVOLVED IN: in 12 processes; LOCATED IN: nucleus, chloroplast, peroxisome, cytoplasm; EXPRESSED IN: 27 plant structures; EXPRESSED IN: 28 plant structures; EXPRESSED DURING: 15 growth stages; CONTAINS InterPro DOMAIN/s: RNA recogn…	Nucleotide-binding, alpha-beta plait | RNA recognition motif domain	NO
AT2G21660	39	2:9265503-9265511	-	EI/AA	0.98911	0.84157	0.14753	0.967	K8	1.747	cold, circadian rhythm, and rna binding 2	cold, circadian rhythm, and rna binding 2 (CCR2); GLYCINE RICH PROTEIN 7 (ATGRP7); FUNCTIONS IN: double-stranded DNA binding, RNA binding, single-stranded DNA binding; INVOLVED IN: in 12 processes; LOCATED IN: nucleus, chloroplast, peroxisome, cytoplasm; EXPRESSED IN: 27 plant structures; EXPRESSED IN: 28 plant structures; EXPRESSED DURING: 15 growth stages; CONTAINS InterPro DOMAIN/s: RNA recogn…	Nucleotide-binding, alpha-beta plait | RNA recognition motif domain	NO
AT2G22190	5	2:9436364-9436478	-	RI	0.66601	0.041414	0.62459	1	K1	0.9349	Haloacid dehalogenase-like hydrolase (HAD) superfamily protein	Haloacid dehalogenase-like hydrolase (HAD) superfamily protein; FUNCTIONS IN: catalytic activity, trehalose-phosphatase activity; INVOLVED IN: trehalose biosynthetic process, metabolic process; LOCATED IN: cellular_component unknown; EXPRESSED IN: 23 plant structures; EXPRESSED DURING: 12 growth stages; CONTAINS InterPro DOMAIN/s: HAD-superfamily hydrolase, subfamily IIB (InterPro:IPR006379), Tre…	HAD-like domain | HAD-superfamily hydrolase, subfamily IIB | Trehalose-phosphatase	NO
AT2G22250	3	2:9460339-9460852	-	RI	0.93661	0.73421	0.2024	0.966	K2	1.2531	aspartate aminotransferase	aspartate aminotransferase (AAT); FUNCTIONS IN: L-aspartate:2-oxoglutarate aminotransferase activity, pyridoxal phosphate binding, transferase activity, transferring nitrogenous groups, catalytic activity; FUNCTIONS IN: L-aspartate:2-oxoglutarate aminotransferase activity, transferase activity, transferring nitrogenous groups, pyridoxal phosphate binding, catalytic activity; INVOLVED IN: embryo d…	Aminotransferase, class I/classII | Aminotransferases, class-I, pyridoxal-phosphate-binding site | Pyridoxal phosphate-dependent transferase | Pyridoxal phosphate-dependent transferase, major region, subdomain 1 | Pyridoxal phosphate-dependent transferase, major region, subdomain 2	NO
AT2G22795	5	2:9699598-9699732	-	RI	0.93087	0.097112	0.83376	1	K1	0.3781		unknown protein; BEST Arabidopsis thaliana protein match is: unknown protein (TAIR:AT4G37820.1)		NO
AT2G22980	9	2:9779385-9779450	+	RI	0.40864	0.28594	0.1227	0.999	K1	0.9896	serine carboxypeptidase-like 13	serine carboxypeptidase-like 13 (SCPL13); FUNCTIONS IN: serine-type carboxypeptidase activity; INVOLVED IN: proteolysis; LOCATED IN: endomembrane system; EXPRESSED IN: 23 plant structures; EXPRESSED DURING: 13 growth stages; CONTAINS InterPro DOMAIN/s: Peptidase S10, serine carboxypeptidase (InterPro:IPR001563); BEST Arabidopsis thaliana protein match is: serine carboxypeptidase-like 11 (TAIR:AT2…	Alpha/Beta hydrolase fold | Peptidase S10, serine carboxypeptidase	NO
AT2G22990	6	2:9786512-9786582	+	RI	0.42459	0.21316	0.21142	1	K1	0.995	sinapoylglucose 1	sinapoylglucose 1; sinapoylglucose 1 (SNG1); CONTAINS InterPro DOMAIN/s: Peptidase S10, serine carboxypeptidase (InterPro:IPR001563); FUNCTIONS IN: sinapoylglucose-malate O-sinapoyltransferase activity, serine-type carboxypeptidase activity; BEST Arabidopsis thaliana protein match is: serine carboxypeptidase-like 9 (TAIR:AT2G23010.1); INVOLVED IN: phenylpropanoid metabolic process, proteolysis; L…	Alpha/Beta hydrolase fold | Peptidase S10, serine carboxypeptidase	NO
AT2G23140	10	2:9848770-9848858	-	RI	0.4056	0.083182	0.32242	0.994	K2	1.9116	RING/U-box superfamily protein with ARM repeat domain	RING/U-box superfamily protein with ARM repeat domain; FUNCTIONS IN: ubiquitin-protein ligase activity, binding; INVOLVED IN: protein ubiquitination; LOCATED IN: ubiquitin ligase complex; EXPRESSED IN: male gametophyte, cultured cell, pollen tube; EXPRESSED IN: male gametophyte, pollen tube; EXPRESSED DURING: L mature pollen stage, M germinated pollen stage; CONTAINS InterPro DOMAIN/s: U box doma…	Armadillo | Armadillo-like helical | Armadillo-type fold | U box domain | Zinc finger, RING/FYVE/PHD-type	NO
AT2G23140	9	2:9848859-9848939	-	AD	0.34185	0.14852	0.19334	0.933	K2	1.5794	RING/U-box superfamily protein with ARM repeat domain	RING/U-box superfamily protein with ARM repeat domain; FUNCTIONS IN: ubiquitin-protein ligase activity, binding; INVOLVED IN: protein ubiquitination; LOCATED IN: ubiquitin ligase complex; EXPRESSED IN: male gametophyte, cultured cell, pollen tube; EXPRESSED IN: male gametophyte, pollen tube; EXPRESSED DURING: L mature pollen stage, M germinated pollen stage; CONTAINS InterPro DOMAIN/s: U box doma…	Armadillo | Armadillo-like helical | Armadillo-type fold | U box domain | Zinc finger, RING/FYVE/PHD-type	NO
AT2G23740	10	2:10097660-10097730	+	RI	0.91663	0.62488	0.29175	0.998	K2	1.6639	nucleic acid binding;sequence-specific DNA binding transcription factors;zinc ion binding	nucleic acid binding;sequence-specific DNA binding transcription factors;zinc ion binding; FUNCTIONS IN: sequence-specific DNA binding transcription factor activity, zinc ion binding, nucleic acid binding; INVOLVED IN: chromatin modification; LOCATED IN: intracellular, nucleus; LOCATED IN: nucleus, intracellular; EXPRESSED IN: 22 plant structures; EXPRESSED DURING: 13 growth stages; CONTAINS Inte…	Post-SET domain | Pre-SET domain | SET domain | Zinc finger, C2H2 | Zinc finger, C2H2-like	NO
AT2G23740	12	2:10097798-10098150	+	RI	0.90566	0.36455	0.54111	1	K2	1.6639	nucleic acid binding;sequence-specific DNA binding transcription factors;zinc ion binding	nucleic acid binding;sequence-specific DNA binding transcription factors;zinc ion binding; FUNCTIONS IN: sequence-specific DNA binding transcription factor activity, zinc ion binding, nucleic acid binding; INVOLVED IN: chromatin modification; LOCATED IN: intracellular, nucleus; LOCATED IN: nucleus, intracellular; EXPRESSED IN: 22 plant structures; EXPRESSED DURING: 13 growth stages; CONTAINS Inte…	Post-SET domain | Pre-SET domain | SET domain | Zinc finger, C2H2 | Zinc finger, C2H2-like	NO
AT2G23760	6	2:10112779-10112885	-	RI	0.44065	0.19852	0.24213	0.945	K2	1.2782	BEL1-like homeodomain 4	BEL1-like homeodomain 4 (BLH4); FUNCTIONS IN: DNA binding, sequence-specific DNA binding transcription factor activity; INVOLVED IN: N-terminal protein myristoylation, leaf morphogenesis; INVOLVED IN: leaf morphogenesis; LOCATED IN: nucleus; EXPRESSED IN: 24 plant structures; EXPRESSED DURING: 12 growth stages; CONTAINS InterPro DOMAIN/s: Homeobox (InterPro:IPR001356), Homeodomain-like (InterPro:…	Homeobox KN domain | Homeobox domain | Homeodomain-like | POX domain	NO
AT2G23890	7	2:10170728-10170814	+	RI	0.014286	0.16703	-0.15274	1	K1	0.6724	HAD-superfamily hydrolase, subfamily IG, 5'-nucleotidase	HAD-superfamily hydrolase, subfamily IG, 5'-nucleotidase; FUNCTIONS IN: 5'-nucleotidase activity; INVOLVED IN: biological_process unknown; LOCATED IN: mitochondrion; EXPRESSED IN: 23 plant structures; EXPRESSED DURING: 13 growth stages; CONTAINS InterPro DOMAIN/s: HAD-superfamily hydrolase, subfamily IG, 5&apos;-nucleotidase (InterPro:IPR008380), Purine 5&apos;-nucleotidase (InterPro:IPR016695); …	HAD-like domain | HAD-superfamily hydrolase, subfamily IG, 5'-nucleotidase | Purine 5'-nucleotidase	NO
AT2G23980	4	2:10204032-10204040	-	AA	0.67097	0.50231	0.16866	0.999	K2	1.5842	cyclic nucleotide-gated channel 6	cyclic nucleotide-gated channel 6 (CNGC6); FUNCTIONS IN: calmodulin binding; INVOLVED IN: response to cadmium ion; LOCATED IN: plasma membrane; EXPRESSED IN: 24 plant structures; EXPRESSED DURING: 13 growth stages; CONTAINS InterPro DOMAIN/s: Cyclic nucleotide-binding (InterPro:IPR000595), Potassium channel, voltage-dependent, EAG/ELK/ERG (InterPro:IPR003938), Ion transport (InterPro:IPR005821), …	Cyclic nucleotide-binding domain | Cyclic nucleotide-binding-like | IQ motif, EF-hand binding site | Ion transport domain | Potassium channel, voltage-dependent, EAG/ELK/ERG | RmlC-like jelly roll fold	NO
AT2G24120	21	2:10251197-10251289	-	RI	0.16437	0.31129	-0.14692	0.981	K3	1.9197	DNA/RNA polymerases superfamily protein	SCABRA 3 (SCA3); FUNCTIONS IN: DNA-directed RNA polymerase activity, protein binding, DNA binding; INVOLVED IN: transcription; LOCATED IN: mitochondrion; EXPRESSED IN: 21 plant structures; EXPRESSED DURING: 13 growth stages; CONTAINS InterPro DOMAIN/s: DNA-directed RNA polymerase, bacteriophage type (InterPro:IPR002092); BEST Arabidopsis thaliana protein match is: male gametophyte defective 3 (TA…	DNA-directed RNA polymerase N-terminal domain | DNA-directed RNA polymerase, helix hairpin domain | DNA-directed RNA polymerase, phage-type	NO
AT2G24270	7	2:10329619-10329721	-	RI	0.76855	0.89444	-0.1259	1	K2	1.0093	aldehyde dehydrogenase 11A3	aldehyde dehydrogenase 11A3 (ALDH11A3); FUNCTIONS IN: 3-chloroallyl aldehyde dehydrogenase activity, glyceraldehyde-3-phosphate dehydrogenase (NADP+) activity; INVOLVED IN: oxidation reduction, metabolic process; EXPRESSED IN: 25 plant structures; EXPRESSED IN: 26 plant structures; EXPRESSED DURING: 14 growth stages; EXPRESSED DURING: 15 growth stages; CONTAINS InterPro DOMAIN/s: Aldehyde/histidi…	Aldehyde dehydrogenase domain | Aldehyde dehydrogenase, C-terminal | Aldehyde dehydrogenase, N-terminal | Aldehyde dehydrogenase, cysteine active site | Aldehyde dehydrogenase, glutamic acid active site | Aldehyde/histidinol dehydrogenase	NO
AT2G24350	2	2:10361365-10361835	+	RI	0.61712	0.39993	0.21719	0.909	K1	0.9994	RNA binding (RRM/RBD/RNP motifs) family protein	RNA binding (RRM/RBD/RNP motifs) family protein; FUNCTIONS IN: RNA binding, nucleotide binding, nucleic acid binding; INVOLVED IN: biological_process unknown; LOCATED IN: cellular_component unknown; CONTAINS InterPro DOMAIN/s: RNA recognition motif, RNP-1 (InterPro:IPR000504), Nucleotide-binding, alpha-beta plait (InterPro:IPR012677); BEST Arabidopsis thaliana protein match is: RNA binding (RRM/R…	Nucleotide-binding, alpha-beta plait | PWI domain | RNA recognition motif domain	NO
AT2G24610	3	2:10457134-10457343	+	RI	0.58818	0.15706	0.43112	0.985	K1	0.9975	cyclic nucleotide-gated channel 14	cyclic nucleotide-gated channel 14 (CNGC14); FUNCTIONS IN: ion channel activity, cyclic nucleotide binding, calmodulin binding; INVOLVED IN: potassium ion transport, ion transport, transmembrane transport; LOCATED IN: membrane; EXPRESSED IN: 9 plant structures; EXPRESSED DURING: 6 growth stages; CONTAINS InterPro DOMAIN/s: Cyclic nucleotide-binding (InterPro:IPR000595), Potassium channel, voltage…	Cyclic nucleotide-binding domain | Cyclic nucleotide-binding-like | Ion transport domain | Potassium channel, voltage-dependent, EAG/ELK/ERG | RmlC-like jelly roll fold	NO
AT2G24800	7	2:10571671-10571753	-	RI	0.23258	0.11305	0.11953	0.909	K1	0.8315	Peroxidase superfamily protein	Peroxidase superfamily protein; FUNCTIONS IN: peroxidase activity, heme binding; INVOLVED IN: oxidation reduction, response to oxidative stress; LOCATED IN: endomembrane system; EXPRESSED IN: leaf whorl, sperm cell, sepal, flower; EXPRESSED DURING: petal differentiation and expansion stage; CONTAINS InterPro DOMAIN/s: Haem peroxidase (InterPro:IPR010255), Plant peroxidase (InterPro:IPR000823), Pe…	Haem peroxidase | Haem peroxidase, plant/fungal/bacterial | Peroxidases heam-ligand binding site | Plant peroxidase	NO
AT2G25050	34	2:10654469-10654582	-	RI	0.01943	0.17035	-0.15092	0.993	K1	0.8246	Actin-binding FH2 (Formin Homology) protein	Actin-binding FH2 (Formin Homology) protein; FUNCTIONS IN: actin binding; INVOLVED IN: cellular component organization, actin cytoskeleton organization; CONTAINS InterPro DOMAIN/s: Actin-binding FH2/DRF autoregulatory (InterPro:IPR003104), C2 calcium/lipid-binding domain, CaLB (InterPro:IPR008973), Actin-binding FH2 (InterPro:IPR015425), Tensin phosphatase, C2 domain (InterPro:IPR014020); BEST Ar…	C2 domain | Formin, FH2 domain | Protein-tyrosine phosphatase-like | Tensin phosphatase, C2 domain	NO
AT2G25050	36	2:10654251-10654401	-	RI	0.069648	0.25446	-0.18482	0.971	K1	0.9603	Actin-binding FH2 (Formin Homology) protein	Actin-binding FH2 (Formin Homology) protein; FUNCTIONS IN: actin binding; INVOLVED IN: cellular component organization, actin cytoskeleton organization; CONTAINS InterPro DOMAIN/s: Actin-binding FH2/DRF autoregulatory (InterPro:IPR003104), C2 calcium/lipid-binding domain, CaLB (InterPro:IPR008973), Actin-binding FH2 (InterPro:IPR015425), Tensin phosphatase, C2 domain (InterPro:IPR014020); BEST Ar…	C2 domain | Formin, FH2 domain | Protein-tyrosine phosphatase-like | Tensin phosphatase, C2 domain	NO
AT2G25170	3	2:10714024-10714102	+	RI	0.29657	0.06348	0.23309	0.997	K3	1.2058	chromatin remodeling factor CHD3 (PICKLE)	PICKLE (PKL); CONTAINS InterPro DOMAIN/s: Protein of unknown function DUF1087 (InterPro:IPR009463), Zinc finger, RING-type (InterPro:IPR001841), Zinc finger, PHD-type, conserved site (InterPro:IPR019786), Zinc finger, PHD-type (InterPro:IPR001965), Protein of unknown function DUF1086 (InterPro:IPR009462), Chromo domain (InterPro:IPR000953), SNF2-related (InterPro:IPR000330), DEAD-like helicase, N…	Chromo domain | Chromo domain-like | Chromo domain/shadow | Domain of unknown function DUF1086 | Domain of unknown function DUF1087 | Helicase, C-terminal | Helicase, superfamily 1/2, ATP-binding domain | P-loop containing nucleoside triphosphate hydrolase | SNF2-related | Zinc finger, PHD-finger | Zinc finger, PHD-type | Zinc finger, PHD-type, conserved site | Zinc finger, RING-type | Zinc finge…	NO
AT2G25170	5	2:10714140-10714407	+	RI	0.28081	0.036048	0.24476	1	K3	1.2058	chromatin remodeling factor CHD3 (PICKLE)	PICKLE (PKL); CONTAINS InterPro DOMAIN/s: Protein of unknown function DUF1087 (InterPro:IPR009463), Zinc finger, RING-type (InterPro:IPR001841), Zinc finger, PHD-type, conserved site (InterPro:IPR019786), Zinc finger, PHD-type (InterPro:IPR001965), Protein of unknown function DUF1086 (InterPro:IPR009462), Chromo domain (InterPro:IPR000953), SNF2-related (InterPro:IPR000330), DEAD-like helicase, N…	Chromo domain | Chromo domain-like | Chromo domain/shadow | Domain of unknown function DUF1086 | Domain of unknown function DUF1087 | Helicase, C-terminal | Helicase, superfamily 1/2, ATP-binding domain | P-loop containing nucleoside triphosphate hydrolase | SNF2-related | Zinc finger, PHD-finger | Zinc finger, PHD-type | Zinc finger, PHD-type, conserved site | Zinc finger, RING-type | Zinc finge…	NO
AT2G25180	5	2:10726555-10726834	-	RI	0.22839	0.041435	0.18696	0.992	K1	0.8578	response regulator 12	response regulator 12 (RR12); CONTAINS InterPro DOMAIN/s: Response regulator, plant B-type (InterPro:IPR017053), Myb-like DNA-binding domain, SHAQKYF class (InterPro:IPR006447), CheY-like (InterPro:IPR011006), Myb, DNA-binding (InterPro:IPR014778), Homeodomain-like (InterPro:IPR009057), Signal transduction response regulator, receiver domain (InterPro:IPR001789), HTH transcriptional regulator, My…	CheY-like superfamily | Homeodomain-like | Myb domain | Myb domain, plants | Response regulator, plant B-type | SANT/Myb domain | Signal transduction response regulator, receiver domain	NO
AT2G25590	14	2:10891383-10891452	+	EI/RI	0.4843	0.32487	0.15943	0.996	K6	3.5054	Plant Tudor-like protein	Plant Tudor-like protein; FUNCTIONS IN: RNA binding; INVOLVED IN: biological_process unknown; EXPRESSED IN: 24 plant structures; EXPRESSED DURING: 14 growth stages; CONTAINS InterPro DOMAIN/s: Tudor-like, plant (InterPro:IPR014002), Agenet (InterPro:IPR008395); BEST Arabidopsis thaliana protein match is: Plant Tudor-like RNA-binding protein (TAIR:AT4G32440.3)	Agenet-like domain | Tudor-like, plant	NO
AT2G25590	14	2:10891383-10891452	+	RI	0.4843	0.32487	0.15943	0.996	K6	3.5054	Plant Tudor-like protein	Plant Tudor-like protein; FUNCTIONS IN: RNA binding; INVOLVED IN: biological_process unknown; EXPRESSED IN: 24 plant structures; EXPRESSED DURING: 14 growth stages; CONTAINS InterPro DOMAIN/s: Tudor-like, plant (InterPro:IPR014002), Agenet (InterPro:IPR008395); BEST Arabidopsis thaliana protein match is: Plant Tudor-like RNA-binding protein (TAIR:AT4G32440.3)	Agenet-like domain | Tudor-like, plant	NO
AT2G25590	24	2:10892554-10892600	+	RI	0.81525	0.91786	-0.10261	0.961	K6	3.5054	Plant Tudor-like protein	Plant Tudor-like protein; FUNCTIONS IN: RNA binding; INVOLVED IN: biological_process unknown; EXPRESSED IN: 24 plant structures; EXPRESSED DURING: 14 growth stages; CONTAINS InterPro DOMAIN/s: Tudor-like, plant (InterPro:IPR014002), Agenet (InterPro:IPR008395); BEST Arabidopsis thaliana protein match is: Plant Tudor-like RNA-binding protein (TAIR:AT4G32440.3)	Agenet-like domain | Tudor-like, plant	NO
AT2G25605	5	2:10899995-10900076	+	RI	0.55124	0.35599	0.19525	0.999	K2	1.1361		unknown protein; FUNCTIONS IN: molecular_function unknown; INVOLVED IN: biological_process unknown; LOCATED IN: chloroplast		NO
AT2G25605	5	2:10900077-10900096	+	AA	0.55299	0.36929	0.1837	0.999	K2	1.1265		unknown protein; FUNCTIONS IN: molecular_function unknown; INVOLVED IN: biological_process unknown; LOCATED IN: chloroplast		NO
AT2G25670	3	2:10930720-10930827	-	RI	0.98788	0.53289	0.45499	1	K2	1.1236		BEST Arabidopsis thaliana protein match is: copper ion binding (TAIR:AT4G32610.1)		NO
AT2G25710	6	2:10952831-10952949	+	RI	0.31251	0.079156	0.23335	0.994	K4	1.4341	holocarboxylase synthase 1	holocarboxylase synthase 1 (HCS1); FUNCTIONS IN: biotin-[acetyl-CoA-carboxylase] ligase activity, catalytic activity; INVOLVED IN: protein modification process; EXPRESSED IN: 22 plant structures; EXPRESSED DURING: 13 growth stages; CONTAINS InterPro DOMAIN/s: Biotin protein ligase, C-terminal (InterPro:IPR003142), Biotin/lipoate A/B protein ligase (InterPro:IPR004143), Biotin--acetyl-CoA-carboxyl…	Biotin protein ligase, C-terminal | Biotin--acetyl-CoA-carboxylase ligase | Biotin/lipoate A/B protein ligase	NO
AT2G25740	2	2:10980345-10980564	+	RI	0.59899	0.41917	0.17983	0.958	K1	0.9982	ATP-dependent protease La (LON) domain protein	ATP-dependent protease La (LON) domain protein; FUNCTIONS IN: ATP-dependent peptidase activity; INVOLVED IN: proteolysis, N-terminal protein myristoylation; LOCATED IN: cellular_component unknown; EXPRESSED IN: 22 plant structures; EXPRESSED DURING: 13 growth stages; CONTAINS InterPro DOMAIN/s: Peptidase S16, lon N-terminal (InterPro:IPR003111)	PUA-like domain | Peptidase S16, lon N-terminal	NO
AT2G25850	16	2:11026243-11026458	-	AA	0.076467	0.27785	-0.20139	1	K1	0.8834	poly(A) polymerase 2	poly(A) polymerase 2 (PAPS2); CONTAINS InterPro DOMAIN/s: Poly(A) polymerase (InterPro:IPR014492), Nucleotidyltransferase, class I, C-terminal-like (InterPro:IPR011068), Poly(A) polymerase, central domain (InterPro:IPR007012), Nucleotidyl transferase domain (InterPro:IPR002934), Poly(A) polymerase, RNA-binding domain (InterPro:IPR007010); CONTAINS InterPro DOMAIN/s: Poly(A) polymerase (InterPro:I…	Nucleotidyl transferase domain | Nucleotidyltransferase, class I, C-terminal-like | Poly(A) polymerase | Poly(A) polymerase, RNA-binding domain | Poly(A) polymerase, central domain	NO
AT2G25850	24	2:11026459-11026619	-	RI	0.14546	0.30107	-0.15561	0.989	K2	0.9183	poly(A) polymerase 2	poly(A) polymerase 2 (PAPS2); CONTAINS InterPro DOMAIN/s: Poly(A) polymerase (InterPro:IPR014492), Nucleotidyltransferase, class I, C-terminal-like (InterPro:IPR011068), Poly(A) polymerase, central domain (InterPro:IPR007012), Nucleotidyl transferase domain (InterPro:IPR002934), Poly(A) polymerase, RNA-binding domain (InterPro:IPR007010); CONTAINS InterPro DOMAIN/s: Poly(A) polymerase (InterPro:I…	Nucleotidyl transferase domain | Nucleotidyltransferase, class I, C-terminal-like | Poly(A) polymerase | Poly(A) polymerase, RNA-binding domain | Poly(A) polymerase, central domain	NO
AT2G26030	10	2:11092928-11093016	-	AA	0.74185	0.42838	0.31347	1	K5	3.3419	F-box/RNI-like/FBD-like domains-containing protein	F-box/RNI-like/FBD-like domains-containing protein; CONTAINS InterPro DOMAIN/s: FBD (InterPro:IPR013596), F-box domain, cyclin-like (InterPro:IPR001810), F-box domain, Skp2-like (InterPro:IPR022364), FBD-like (InterPro:IPR006566), Leucine-rich repeat 2 (InterPro:IPR013101); CONTAINS InterPro DOMAIN/s: FBD (InterPro:IPR013596), F-box domain, cyclin-like (InterPro:IPR001810), FBD-like (InterPro:IPR…	F-box domain | FBD domain | Leucine-rich repeat 2	NO
AT2G26030	11	2:11092657-11092927	-	CE	0.87514	0.73609	0.13904	0.963	K5	3.3419	F-box/RNI-like/FBD-like domains-containing protein	F-box/RNI-like/FBD-like domains-containing protein; CONTAINS InterPro DOMAIN/s: FBD (InterPro:IPR013596), F-box domain, cyclin-like (InterPro:IPR001810), F-box domain, Skp2-like (InterPro:IPR022364), FBD-like (InterPro:IPR006566), Leucine-rich repeat 2 (InterPro:IPR013101); CONTAINS InterPro DOMAIN/s: FBD (InterPro:IPR013596), F-box domain, cyclin-like (InterPro:IPR001810), FBD-like (InterPro:IPR…	F-box domain | FBD domain | Leucine-rich repeat 2	NO
AT2G26030	12	2:11092653-11092656	-	AD	0.82422	0.63426	0.18996	0.945	K5	3.3419	F-box/RNI-like/FBD-like domains-containing protein	F-box/RNI-like/FBD-like domains-containing protein; CONTAINS InterPro DOMAIN/s: FBD (InterPro:IPR013596), F-box domain, cyclin-like (InterPro:IPR001810), F-box domain, Skp2-like (InterPro:IPR022364), FBD-like (InterPro:IPR006566), Leucine-rich repeat 2 (InterPro:IPR013101); CONTAINS InterPro DOMAIN/s: FBD (InterPro:IPR013596), F-box domain, cyclin-like (InterPro:IPR001810), FBD-like (InterPro:IPR…	F-box domain | FBD domain | Leucine-rich repeat 2	NO
AT2G26030	13	2:11092657-11092672	-	EI/AD	0.87735	0.75642	0.12093	0.95	K7	3.2655	F-box/RNI-like/FBD-like domains-containing protein	F-box/RNI-like/FBD-like domains-containing protein; CONTAINS InterPro DOMAIN/s: FBD (InterPro:IPR013596), F-box domain, cyclin-like (InterPro:IPR001810), F-box domain, Skp2-like (InterPro:IPR022364), FBD-like (InterPro:IPR006566), Leucine-rich repeat 2 (InterPro:IPR013101); CONTAINS InterPro DOMAIN/s: FBD (InterPro:IPR013596), F-box domain, cyclin-like (InterPro:IPR001810), FBD-like (InterPro:IPR…	F-box domain | FBD domain | Leucine-rich repeat 2	NO
AT2G26030	14	2:11092222-11092582	-	AA	0.84396	0.66806	0.1759	0.973	K5	3.3419	F-box/RNI-like/FBD-like domains-containing protein	F-box/RNI-like/FBD-like domains-containing protein; CONTAINS InterPro DOMAIN/s: FBD (InterPro:IPR013596), F-box domain, cyclin-like (InterPro:IPR001810), F-box domain, Skp2-like (InterPro:IPR022364), FBD-like (InterPro:IPR006566), Leucine-rich repeat 2 (InterPro:IPR013101); CONTAINS InterPro DOMAIN/s: FBD (InterPro:IPR013596), F-box domain, cyclin-like (InterPro:IPR001810), FBD-like (InterPro:IPR…	F-box domain | FBD domain | Leucine-rich repeat 2	NO
AT2G26030	14	2:11092653-11092656	-	EI/AD	0.85735	0.73212	0.12523	0.936	K7	3.2655	F-box/RNI-like/FBD-like domains-containing protein	F-box/RNI-like/FBD-like domains-containing protein; CONTAINS InterPro DOMAIN/s: FBD (InterPro:IPR013596), F-box domain, cyclin-like (InterPro:IPR001810), F-box domain, Skp2-like (InterPro:IPR022364), FBD-like (InterPro:IPR006566), Leucine-rich repeat 2 (InterPro:IPR013101); CONTAINS InterPro DOMAIN/s: FBD (InterPro:IPR013596), F-box domain, cyclin-like (InterPro:IPR001810), FBD-like (InterPro:IPR…	F-box domain | FBD domain | Leucine-rich repeat 2	NO
AT2G26030	15	2:11092206-11092221	-	AA	0.89985	0.7115	0.18834	0.994	K5	3.3419	F-box/RNI-like/FBD-like domains-containing protein	F-box/RNI-like/FBD-like domains-containing protein; CONTAINS InterPro DOMAIN/s: FBD (InterPro:IPR013596), F-box domain, cyclin-like (InterPro:IPR001810), F-box domain, Skp2-like (InterPro:IPR022364), FBD-like (InterPro:IPR006566), Leucine-rich repeat 2 (InterPro:IPR013101); CONTAINS InterPro DOMAIN/s: FBD (InterPro:IPR013596), F-box domain, cyclin-like (InterPro:IPR001810), FBD-like (InterPro:IPR…	F-box domain | FBD domain | Leucine-rich repeat 2	NO
AT2G26030	15	2:11092583-11092652	-	EI/RI	0.85257	0.70701	0.14557	0.954	K7	3.2655	F-box/RNI-like/FBD-like domains-containing protein	F-box/RNI-like/FBD-like domains-containing protein; CONTAINS InterPro DOMAIN/s: FBD (InterPro:IPR013596), F-box domain, cyclin-like (InterPro:IPR001810), F-box domain, Skp2-like (InterPro:IPR022364), FBD-like (InterPro:IPR006566), Leucine-rich repeat 2 (InterPro:IPR013101); CONTAINS InterPro DOMAIN/s: FBD (InterPro:IPR013596), F-box domain, cyclin-like (InterPro:IPR001810), FBD-like (InterPro:IPR…	F-box domain | FBD domain | Leucine-rich repeat 2	NO
AT2G26030	15	2:11092583-11092652	-	RI	0.85257	0.70701	0.14557	0.954	K7	3.2655	F-box/RNI-like/FBD-like domains-containing protein	F-box/RNI-like/FBD-like domains-containing protein; CONTAINS InterPro DOMAIN/s: FBD (InterPro:IPR013596), F-box domain, cyclin-like (InterPro:IPR001810), F-box domain, Skp2-like (InterPro:IPR022364), FBD-like (InterPro:IPR006566), Leucine-rich repeat 2 (InterPro:IPR013101); CONTAINS InterPro DOMAIN/s: FBD (InterPro:IPR013596), F-box domain, cyclin-like (InterPro:IPR001810), FBD-like (InterPro:IPR…	F-box domain | FBD domain | Leucine-rich repeat 2	NO
AT2G26030	16	2:11092195-11092205	-	AA	0.94478	0.84057	0.10422	0.94	K5	3.3419	F-box/RNI-like/FBD-like domains-containing protein	F-box/RNI-like/FBD-like domains-containing protein; CONTAINS InterPro DOMAIN/s: FBD (InterPro:IPR013596), F-box domain, cyclin-like (InterPro:IPR001810), F-box domain, Skp2-like (InterPro:IPR022364), FBD-like (InterPro:IPR006566), Leucine-rich repeat 2 (InterPro:IPR013101); CONTAINS InterPro DOMAIN/s: FBD (InterPro:IPR013596), F-box domain, cyclin-like (InterPro:IPR001810), FBD-like (InterPro:IPR…	F-box domain | FBD domain | Leucine-rich repeat 2	NO
AT2G26030	16	2:11092475-11092582	-	EI/CE	0.88893	0.76352	0.12541	0.985	K7	3.2655	F-box/RNI-like/FBD-like domains-containing protein	F-box/RNI-like/FBD-like domains-containing protein; CONTAINS InterPro DOMAIN/s: FBD (InterPro:IPR013596), F-box domain, cyclin-like (InterPro:IPR001810), F-box domain, Skp2-like (InterPro:IPR022364), FBD-like (InterPro:IPR006566), Leucine-rich repeat 2 (InterPro:IPR013101); CONTAINS InterPro DOMAIN/s: FBD (InterPro:IPR013596), F-box domain, cyclin-like (InterPro:IPR001810), FBD-like (InterPro:IPR…	F-box domain | FBD domain | Leucine-rich repeat 2	NO
AT2G26030	17	2:11092222-11092474	-	EI/RI	0.87806	0.74293	0.13513	0.961	K7	3.2655	F-box/RNI-like/FBD-like domains-containing protein	F-box/RNI-like/FBD-like domains-containing protein; CONTAINS InterPro DOMAIN/s: FBD (InterPro:IPR013596), F-box domain, cyclin-like (InterPro:IPR001810), F-box domain, Skp2-like (InterPro:IPR022364), FBD-like (InterPro:IPR006566), Leucine-rich repeat 2 (InterPro:IPR013101); CONTAINS InterPro DOMAIN/s: FBD (InterPro:IPR013596), F-box domain, cyclin-like (InterPro:IPR001810), FBD-like (InterPro:IPR…	F-box domain | FBD domain | Leucine-rich repeat 2	NO
AT2G26030	17	2:11092222-11092474	-	RI	0.87806	0.74293	0.13513	0.961	K7	3.2655	F-box/RNI-like/FBD-like domains-containing protein	F-box/RNI-like/FBD-like domains-containing protein; CONTAINS InterPro DOMAIN/s: FBD (InterPro:IPR013596), F-box domain, cyclin-like (InterPro:IPR001810), F-box domain, Skp2-like (InterPro:IPR022364), FBD-like (InterPro:IPR006566), Leucine-rich repeat 2 (InterPro:IPR013101); CONTAINS InterPro DOMAIN/s: FBD (InterPro:IPR013596), F-box domain, cyclin-like (InterPro:IPR001810), FBD-like (InterPro:IPR…	F-box domain | FBD domain | Leucine-rich repeat 2	NO
AT2G26030	18	2:11092206-11092221	-	EI/AA	0.91482	0.77221	0.14261	0.984	K7	3.2655	F-box/RNI-like/FBD-like domains-containing protein	F-box/RNI-like/FBD-like domains-containing protein; CONTAINS InterPro DOMAIN/s: FBD (InterPro:IPR013596), F-box domain, cyclin-like (InterPro:IPR001810), F-box domain, Skp2-like (InterPro:IPR022364), FBD-like (InterPro:IPR006566), Leucine-rich repeat 2 (InterPro:IPR013101); CONTAINS InterPro DOMAIN/s: FBD (InterPro:IPR013596), F-box domain, cyclin-like (InterPro:IPR001810), FBD-like (InterPro:IPR…	F-box domain | FBD domain | Leucine-rich repeat 2	NO
AT2G26030	9	2:11093017-11093096	-	RI	0.64687	0.34989	0.29698	1	K7	3.2655	F-box/RNI-like/FBD-like domains-containing protein	F-box/RNI-like/FBD-like domains-containing protein; CONTAINS InterPro DOMAIN/s: FBD (InterPro:IPR013596), F-box domain, cyclin-like (InterPro:IPR001810), F-box domain, Skp2-like (InterPro:IPR022364), FBD-like (InterPro:IPR006566), Leucine-rich repeat 2 (InterPro:IPR013101); CONTAINS InterPro DOMAIN/s: FBD (InterPro:IPR013596), F-box domain, cyclin-like (InterPro:IPR001810), FBD-like (InterPro:IPR…	F-box domain | FBD domain | Leucine-rich repeat 2	NO
AT2G26280	3	2:11191160-11191236	-	RI	0.15037	0.58697	-0.43659	1	K3	1.4286	CTC-interacting domain 7	CID7; FUNCTIONS IN: damaged DNA binding, protein binding, ATP binding; INVOLVED IN: mismatch repair; LOCATED IN: chloroplast; EXPRESSED IN: 22 plant structures; EXPRESSED DURING: 13 growth stages; CONTAINS InterPro DOMAIN/s: Smr protein/MutS2 C-terminal (InterPro:IPR002625), Region of unknown function DUF1771 (InterPro:IPR013899); BEST Arabidopsis thaliana protein match is: PRLI-interacting facto…	Domain of unknown function DUF1771 | Smr protein/MutS2 C-terminal	NO
AT2G26280	4	2:11191096-11191159	-	CE	0.044457	0.65005	-0.60559	1	K2	1.3867	CTC-interacting domain 7	CID7; FUNCTIONS IN: damaged DNA binding, protein binding, ATP binding; INVOLVED IN: mismatch repair; LOCATED IN: chloroplast; EXPRESSED IN: 22 plant structures; EXPRESSED DURING: 13 growth stages; CONTAINS InterPro DOMAIN/s: Smr protein/MutS2 C-terminal (InterPro:IPR002625), Region of unknown function DUF1771 (InterPro:IPR013899); BEST Arabidopsis thaliana protein match is: PRLI-interacting facto…	Domain of unknown function DUF1771 | Smr protein/MutS2 C-terminal	NO
AT2G26280	5	2:11190785-11191095	-	RI	0.14669	0.0081756	0.13852	0.999	K2	0.8245	CTC-interacting domain 7	CID7; FUNCTIONS IN: damaged DNA binding, protein binding, ATP binding; INVOLVED IN: mismatch repair; LOCATED IN: chloroplast; EXPRESSED IN: 22 plant structures; EXPRESSED DURING: 13 growth stages; CONTAINS InterPro DOMAIN/s: Smr protein/MutS2 C-terminal (InterPro:IPR002625), Region of unknown function DUF1771 (InterPro:IPR013899); BEST Arabidopsis thaliana protein match is: PRLI-interacting facto…	Domain of unknown function DUF1771 | Smr protein/MutS2 C-terminal	NO
AT2G26300	4	2:11197469-11197820	+	AD	0.35435	0.016157	0.33819	1	K3	1.5188	G protein alpha subunit 1	G protein alpha subunit 1 (GP ALPHA 1); FUNCTIONS IN: in 6 functions; INVOLVED IN: in 16 processes; LOCATED IN: plasma membrane, endoplasmic reticulum membrane, heterotrimeric G-protein complex; EXPRESSED IN: 25 plant structures; EXPRESSED DURING: 13 growth stages; CONTAINS InterPro DOMAIN/s: Plant G-protein, alpha subunit (InterPro:IPR002976), Guanine nucleotide binding protein (G-protein), alph…	G protein alpha subunit, helical insertion | Guanine nucleotide binding protein (G-protein), alpha subunit | P-loop containing nucleoside triphosphate hydrolase | Plant G-protein, alpha subunit	NO
AT2G26300	5	2:11197821-11197957	+	RI	0.2626	0.014734	0.24787	1	K3	1.5411	G protein alpha subunit 1	G protein alpha subunit 1 (GP ALPHA 1); FUNCTIONS IN: in 6 functions; INVOLVED IN: in 16 processes; LOCATED IN: plasma membrane, endoplasmic reticulum membrane, heterotrimeric G-protein complex; EXPRESSED IN: 25 plant structures; EXPRESSED DURING: 13 growth stages; CONTAINS InterPro DOMAIN/s: Plant G-protein, alpha subunit (InterPro:IPR002976), Guanine nucleotide binding protein (G-protein), alph…	G protein alpha subunit, helical insertion | Guanine nucleotide binding protein (G-protein), alpha subunit | P-loop containing nucleoside triphosphate hydrolase | Plant G-protein, alpha subunit	NO
AT2G26310	7	2:11202094-11202176	+	CE	0.98535	0.86062	0.12473	0.911	K1	0.7063	Chalcone-flavanone isomerase family protein	Chalcone-flavanone isomerase family protein; FUNCTIONS IN: intramolecular lyase activity; INVOLVED IN: cellular amino acid derivative biosynthetic process; LOCATED IN: cellular_component unknown; CONTAINS InterPro DOMAIN/s: Chalcone isomerase, subgroup (InterPro:IPR003466), Chalcone isomerase (InterPro:IPR016087); BEST Arabidopsis thaliana protein match is: Chalcone-flavanone isomerase family pro…	Chalcone isomerase	NO
AT2G26330	8	2:11213471-11213816	-	RI	0.74007	0.082686	0.65738	1	K1	0.864	Leucine-rich receptor-like protein kinase family protein	ERECTA (ER); CONTAINS InterPro DOMAIN/s: Protein kinase, ATP binding site (InterPro:IPR017441), Protein kinase, catalytic domain (InterPro:IPR000719), Leucine-rich repeat-containing N-terminal domain, type 2 (InterPro:IPR013210), Leucine-rich repeat (InterPro:IPR001611), Serine/threonine-protein kinase-like domain (InterPro:IPR017442), Protein kinase-like domain (InterPro:IPR011009), Serine/threo…	Leucine-rich repeat | Leucine-rich repeat-containing N-terminal, type 2 | Protein kinase domain | Protein kinase, ATP binding site | Protein kinase-like domain | Serine/threonine-protein kinase, active site	NO
AT2G26460	3	2:11258776-11258866	-	RI	0.036087	0.14338	-0.10729	0.956	K1	0.6501	RED family protein	SUPPRESSORS OF MEC-8 AND UNC-52 2 (SMU2); FUNCTIONS IN: molecular_function unknown; INVOLVED IN: RNA splicing; LOCATED IN: nucleus; EXPRESSED IN: 25 plant structures; EXPRESSED DURING: 14 growth stages; CONTAINS InterPro DOMAIN/s: RED-like, N-terminal (InterPro:IPR012916), RED-like, C-terminal (InterPro:IPR012492)	Protein RED, C-terminal | RED-like, N-terminal	NO
AT2G26510	3	2:11274281-11274840	+	RI	0.12415	0.020897	0.10326	0.998	K1	0.6343	Xanthine/uracil permease family protein	pigment defective embryo 135 (PDE135); FUNCTIONS IN: transmembrane transporter activity; INVOLVED IN: transport, transmembrane transport; LOCATED IN: membrane; LOCATED IN: plasma membrane, membrane; EXPRESSED IN: 22 plant structures; EXPRESSED DURING: 13 growth stages; CONTAINS InterPro DOMAIN/s: Xanthine/uracil/vitamin C permease (InterPro:IPR006043); BEST Arabidopsis thaliana protein match is: …	Xanthine/uracil/vitamin C permease	NO
AT2G26590	7	2:11314743-11314984	-	RI	0.15316	0.042464	0.1107	0.999	K2	1.27	regulatory particle non-ATPase 13	regulatory particle non-ATPase 13 (RPN13); FUNCTIONS IN: molecular_function unknown; INVOLVED IN: cell adhesion; LOCATED IN: integral to membrane, nucleus, cytoplasm; EXPRESSED IN: 23 plant structures; EXPRESSED DURING: 13 growth stages; CONTAINS InterPro DOMAIN/s: 26S proteasome complex ubiquitin receptor, subunit Rpn13 (InterPro:IPR006773)	26S proteasome complex ubiquitin receptor, subunit Rpn13	NO
AT2G26600	7	2:11316794-11316998	+	RI	0.16749	0.047179	0.12031	0.969	K3	1.2503	Glycosyl hydrolase superfamily protein	Glycosyl hydrolase superfamily protein; FUNCTIONS IN: cation binding, hydrolase activity, hydrolyzing O-glycosyl compounds, catalytic activity; INVOLVED IN: carbohydrate metabolic process; LOCATED IN: anchored to membrane; EXPRESSED IN: 22 plant structures; EXPRESSED DURING: 13 growth stages; CONTAINS InterPro DOMAIN/s: Glycoside hydrolase, catalytic core (InterPro:IPR017853), Glycoside hydrolase…	Glycoside hydrolase, catalytic domain | Glycoside hydrolase, family 17 | Glycoside hydrolase, superfamily	NO
AT2G26695	2	2:11365133-11365248	+	RI	0.069434	0.2082	-0.13877	0.97	K1	0.789	Ran BP2/NZF zinc finger-like superfamily protein	Ran BP2/NZF zinc finger-like superfamily protein; FUNCTIONS IN: binding, zinc ion binding; INVOLVED IN: biological_process unknown; LOCATED IN: intracellular; CONTAINS InterPro DOMAIN/s: Zinc finger, RanBP2-type (InterPro:IPR001876); BEST Arabidopsis thaliana protein match is: Ran BP2/NZF zinc finger-like superfamily protein (TAIR:AT3G15680.1)	Zinc finger, RanBP2-type	NO
AT2G26860	6	2:11453650-11453751	-	RI	0.47749	0.1469	0.33059	0.94	K1	0.971	FBD, F-box and Leucine Rich Repeat domains containing protein	FBD, F-box and Leucine Rich Repeat domains containing protein; CONTAINS InterPro DOMAIN/s: F-box domain, cyclin-like (InterPro:IPR001810), F-box domain, Skp2-like (InterPro:IPR022364), Leucine-rich repeat 2 (InterPro:IPR013101); CONTAINS InterPro DOMAIN/s: FBD (InterPro:IPR013596), F-box domain, cyclin-like (InterPro:IPR001810), F-box domain, Skp2-like (InterPro:IPR022364), Leucine-rich repeat 2 …	F-box domain | FBD domain | Leucine-rich repeat 2	NO
AT2G26980	22	2:11516427-11516480	-	CE	0.5548	0.40381	0.15098	0.993	K3	1.4631	CBL-interacting protein kinase 3	CBL-interacting protein kinase 3 (CIPK3); CONTAINS InterPro DOMAIN/s: Protein kinase, ATP binding site (InterPro:IPR017441), Serine/threonine-protein kinase domain (InterPro:IPR002290), NAF/FISL domain (InterPro:IPR018451), Serine/threonine-protein kinase-like domain (InterPro:IPR017442), Protein kinase-like domain (InterPro:IPR011009), Serine/threonine-protein kinase, active site (InterPro:IPR00…	NAF domain | NAF/FISL domain | Protein kinase domain | Protein kinase, ATP binding site | Protein kinase-like domain | Serine/threonine-protein kinase, active site | Serine/threonine/dual specificity protein kinase, catalytic domain	NO
AT2G26980	28	2:11516481-11516696	-	RI	0.015581	0.12522	-0.10964	1	K5	1.8035	CBL-interacting protein kinase 3	CBL-interacting protein kinase 3 (CIPK3); CONTAINS InterPro DOMAIN/s: Protein kinase, ATP binding site (InterPro:IPR017441), Serine/threonine-protein kinase domain (InterPro:IPR002290), NAF/FISL domain (InterPro:IPR018451), Serine/threonine-protein kinase-like domain (InterPro:IPR017442), Protein kinase-like domain (InterPro:IPR011009), Serine/threonine-protein kinase, active site (InterPro:IPR00…	NAF domain | NAF/FISL domain | Protein kinase domain | Protein kinase, ATP binding site | Protein kinase-like domain | Serine/threonine-protein kinase, active site | Serine/threonine/dual specificity protein kinase, catalytic domain	NO
AT2G27040	4	2:11541507-11542207	-	RI	0.41534	0.033344	0.38199	1	K1	0.9829	Argonaute family protein	ARGONAUTE 4 (AGO4); CONTAINS InterPro DOMAIN/s: Domain of unknown function DUF1785 (InterPro:IPR014811), Stem cell self-renewal protein Piwi (InterPro:IPR003165), Argonaute/Dicer protein, PAZ (InterPro:IPR003100), Polynucleotidyl transferase, ribonuclease H fold (InterPro:IPR012337); FUNCTIONS IN: siRNA binding; BEST Arabidopsis thaliana protein match is: Argonaute family protein (TAIR:AT5G21150.…	Domain of unknown function DUF1785 | PAZ domain | Ribonuclease H-like domain | Stem cell self-renewal protein Piwi	NO
AT2G27150	4	2:11602079-11602329	+	RI	0.2211	0.078568	0.14253	0.977	K2	1.5213	abscisic aldehyde oxidase 3	abscisic aldehyde oxidase 3 (AAO3); CONTAINS InterPro DOMAIN/s: Aldehyde oxidase/xanthine dehydrogenase (InterPro:IPR016208), Ferredoxin (InterPro:IPR001041), Molybdopterin dehydrogenase, FAD-binding (InterPro:IPR002346), [2Fe-2S]-binding (InterPro:IPR002888), FAD-binding, type 2 (InterPro:IPR016166), CO dehydrogenase flavoprotein, C-terminal (InterPro:IPR005107), 2Fe-2S ferredoxin, iron-sulphur …	2Fe-2S ferredoxin, iron-sulphur binding site | 2Fe-2S ferredoxin-type domain | Aldehyde oxidase/xanthine dehydrogenase | Aldehyde oxidase/xanthine dehydrogenase, a/b hammerhead | Aldehyde oxidase/xanthine dehydrogenase, molybdopterin binding | Beta-grasp domain | CO dehydrogenase flavoprotein, C-terminal | CO dehydrogenase flavoprotein-like, FAD-binding, subdomain 2 | FAD-binding, type 2 | Molybd…	NO
AT2G27170	9	2:11617092-11617175	-	RI	0.34221	0.029395	0.31282	1	K2	1.1468	Structural maintenance of chromosomes (SMC) family protein	TITAN7 (TTN7); FUNCTIONS IN: ATP binding; INVOLVED IN: sister chromatid cohesion, chromosome segregation; LOCATED IN: cohesin complex, nucleus; EXPRESSED IN: 22 plant structures; EXPRESSED DURING: 13 growth stages; CONTAINS InterPro DOMAIN/s: SMCs flexible hinge (InterPro:IPR010935), RecF/RecN/SMC protein, N-terminal (InterPro:IPR003395); BEST Arabidopsis thaliana protein match is: structural mai…	P-loop containing nucleoside triphosphate hydrolase | RecF/RecN/SMC, N-terminal | SMCs flexible hinge | Structural maintenance of chromosomes protein 3	NO
AT2G27340	3	2:11696937-11697043	+	CE	0.7594	0.90943	-0.15003	0.966	K2	1.5213	N-acetylglucosaminylphosphatidylinositol de-N-acetylase family protein	N-acetylglucosaminylphosphatidylinositol de-N-acetylase family protein; FUNCTIONS IN: molecular_function unknown; INVOLVED IN: biological_process unknown; LOCATED IN: endomembrane system; CONTAINS InterPro DOMAIN/s: N-acetylglucosaminyl phosphatidylinositol deacetylase (InterPro:IPR003737); BEST Arabidopsis thaliana protein match is: N-acetylglucosaminylphosphatidylinositol de-N-acetylase family …	N-acetylglucosaminyl phosphatidylinositol deacetylase-related | Putative deacetylase LmbE-like domain	NO
AT2G27350	7	2:11702527-11702706	-	AA	0.22136	0.094649	0.12671	0.984	K2	1.422	OTU-like cysteine protease family protein	OTU-like cysteine protease family protein; FUNCTIONS IN: cysteine-type peptidase activity; INVOLVED IN: biological_process unknown; LOCATED IN: chloroplast; EXPRESSED IN: 24 plant structures; EXPRESSED DURING: 15 growth stages; CONTAINS InterPro DOMAIN/s: Ubiquitin-associated/translation elongation factor EF1B, N-terminal, eukaryote (InterPro:IPR015940), Ovarian tumour, otubain (InterPro:IPR00332…	Ovarian tumour, otubain | UBA-like | Ubiquitin-associated/translation elongation factor EF1B, N-terminal, eukaryote	NO
AT2G27350	7	2:11702707-11704056	-	RI	0.43395	0.12049	0.31347	1	K5	1.7466	OTU-like cysteine protease family protein	OTU-like cysteine protease family protein; FUNCTIONS IN: cysteine-type peptidase activity; INVOLVED IN: biological_process unknown; LOCATED IN: chloroplast; EXPRESSED IN: 24 plant structures; EXPRESSED DURING: 15 growth stages; CONTAINS InterPro DOMAIN/s: Ubiquitin-associated/translation elongation factor EF1B, N-terminal, eukaryote (InterPro:IPR015940), Ovarian tumour, otubain (InterPro:IPR00332…	Ovarian tumour, otubain | UBA-like | Ubiquitin-associated/translation elongation factor EF1B, N-terminal, eukaryote	NO
AT2G27400	3	2:11721729-11722300	-	RI	0.9813	0.87031	0.11099	0.992	K1	0.684	TAS1A; other RNA			NO
AT2G27490	6	2:11749961-11749974	-	AD	0.56882	0.40349	0.16533	0.938	K2	1.5198	dephospho-CoA kinase family	ATCOAE; FUNCTIONS IN: ATP binding, dephospho-CoA kinase activity; INVOLVED IN: coenzyme A biosynthetic process; LOCATED IN: peroxisome, chloroplast, vacuole; EXPRESSED IN: 25 plant structures; EXPRESSED DURING: 15 growth stages; CONTAINS InterPro DOMAIN/s: Dephospho-CoA kinase (InterPro:IPR001977)	Dephospho-CoA kinase | P-loop containing nucleoside triphosphate hydrolase	NO
AT2G27490	7	2:11749092-11749960	-	RI	0.39067	0.11605	0.27462	1	K2	1.5198	dephospho-CoA kinase family	ATCOAE; FUNCTIONS IN: ATP binding, dephospho-CoA kinase activity; INVOLVED IN: coenzyme A biosynthetic process; LOCATED IN: peroxisome, chloroplast, vacuole; EXPRESSED IN: 25 plant structures; EXPRESSED DURING: 15 growth stages; CONTAINS InterPro DOMAIN/s: Dephospho-CoA kinase (InterPro:IPR001977)	Dephospho-CoA kinase | P-loop containing nucleoside triphosphate hydrolase	NO
AT2G28130	15	2:11990222-11990316	+	RI	0.16327	0.30126	-0.138	0.916	K1	0.9456		unknown protein; FUNCTIONS IN: molecular_function unknown; INVOLVED IN: biological_process unknown; LOCATED IN: cellular_component unknown; EXPRESSED IN: 25 plant structures; EXPRESSED DURING: 13 growth stages		NO
AT2G28290	41	2:12072334-12072375	+	AA	0.58507	0.70358	-0.11851	0.943	K2	1.408	P-loop containing nucleoside triphosphate hydrolases superfamily protein	SPLAYED (SYD); CONTAINS InterPro DOMAIN/s: DEAD-like helicase, N-terminal (InterPro:IPR014001), DNA/RNA helicase, C-terminal (InterPro:IPR001650), Helicase/SANT-associated, DNA binding (InterPro:IPR014012), Helicase, superfamily 1/2, ATP-binding domain (InterPro:IPR014021), SNF2-related (InterPro:IPR000330); BEST Arabidopsis thaliana protein match is: Homeotic gene regulator (TAIR:AT3G06010.1)	Glutamine-Leucine-Glutamine, QLQ | Helicase, C-terminal | Helicase, superfamily 1/2, ATP-binding domain | Helicase/SANT-associated, DNA binding | P-loop containing nucleoside triphosphate hydrolase | SNF2-related | Snf2 ATP coupling domain	NO
AT2G28305	9	2:12082590-12083284	+	RI	0.27488	0.13881	0.13608	0.985	K2	0.9909	Putative lysine decarboxylase family protein	LONELY GUY 1 (LOG1); CONTAINS InterPro DOMAIN/s: Conserved hypothetical protein CHP00730 (InterPro:IPR005269); BEST Arabidopsis thaliana protein match is: lysine decarboxylase family protein (TAIR:AT2G37210.1)	Cytokinin riboside 5'-monophosphate phosphoribohydrolase LOG	NO
AT2G28360	17	2:12127221-12127284	-	CE	0.12101	0.24958	-0.12857	0.943	K2	1.1427	SIT4 phosphatase-associated family protein	SIT4 phosphatase-associated family protein; INVOLVED IN: biological_process unknown; LOCATED IN: endomembrane system; EXPRESSED IN: 22 plant structures; EXPRESSED DURING: 13 growth stages; CONTAINS InterPro DOMAIN/s: SIT4 phosphatase-associated protein (InterPro:IPR007587); BEST Arabidopsis thaliana protein match is: SIT4 phosphatase-associated family protein (TAIR:AT1G07990.1)	Armadillo-type fold | SIT4 phosphatase-associated protein family	NO
AT2G28370	2	2:12131759-12131937	+	RI	0.17886	0.016945	0.16192	0.999	K1	0.7803	Uncharacterised protein family (UPF0497)	Uncharacterised protein family (UPF0497); FUNCTIONS IN: molecular_function unknown; INVOLVED IN: biological_process unknown; LOCATED IN: plasma membrane; EXPRESSED IN: 23 plant structures; EXPRESSED DURING: 15 growth stages; CONTAINS InterPro DOMAIN/s: Uncharacterised protein family UPF0497, trans-membrane plant (InterPro:IPR006702); BEST Arabidopsis thaliana protein match is: Uncharacterised pro…	Uncharacterised protein family UPF0497, trans-membrane plant	NO
AT2G28540	10	2:12218384-12218645	+	RI	0.2849	0.030755	0.25415	0.997	K2	1.5705	RNA binding (RRM/RBD/RNP motifs) family protein	RNA binding (RRM/RBD/RNP motifs) family protein; FUNCTIONS IN: nucleotide binding, zinc ion binding, nucleic acid binding; EXPRESSED IN: 24 plant structures; EXPRESSED DURING: 15 growth stages; CONTAINS InterPro DOMAIN/s: RNA recognition motif, RNP-1 (InterPro:IPR000504), Zinc finger, RING-type (InterPro:IPR001841), Nucleotide-binding, alpha-beta plait (InterPro:IPR012677); CONTAINS InterPro DOMA…	Nucleotide-binding, alpha-beta plait | RNA recognition motif domain | Zinc finger, RING-type | Zinc finger, RING/FYVE/PHD-type	NO
AT2G28760	4	2:12338770-12338837	-	CE	0.70102	0.87834	-0.17732	0.904	K2	1.5638	UDP-XYL synthase 6	UDP-XYL synthase 6 (UXS6); FUNCTIONS IN: coenzyme binding, binding, catalytic activity; INVOLVED IN: cellular metabolic process, nucleotide-sugar metabolic process, metabolic process; LOCATED IN: plasma membrane; EXPRESSED IN: 24 plant structures; EXPRESSED IN: 25 plant structures; EXPRESSED DURING: 13 growth stages; CONTAINS InterPro DOMAIN/s: NAD-dependent epimerase/dehydratase (InterPro:IPR001…	NAD(P)-binding domain | NAD-dependent epimerase/dehydratase, N-terminal domain	NO
AT2G29065	2	2:12484860-12485011	+	RI	0.49831	0.19526	0.30305	0.964	K1	1	GRAS family transcription factor	GRAS family transcription factor; CONTAINS InterPro DOMAIN/s: Transcription factor GRAS (InterPro:IPR005202); BEST Arabidopsis thaliana protein match is: GRAS family transcription factor (TAIR:AT1G07520.1)	Transcription factor GRAS	NO
AT2G29070	5	2:12487520-12487789	+	RI	0.22955	0.04059	0.18896	0.992	K1	0.8495	Ubiquitin fusion degradation UFD1 family protein	Ubiquitin fusion degradation UFD1 family protein; INVOLVED IN: ubiquitin-dependent protein catabolic process; LOCATED IN: cellular_component unknown; EXPRESSED IN: 18 plant structures; EXPRESSED DURING: 10 growth stages; CONTAINS InterPro DOMAIN/s: Ubiquitin fusion degradation protein UFD1 (InterPro:IPR004854); BEST Arabidopsis thaliana protein match is: ubiquitin fusion degradation 1 (TAIR:AT2G2…	Ubiquitin fusion degradation protein UFD1	NO
AT2G29090	18	2:12495129-12495833	-	RI	0.060429	0.16795	-0.10752	0.946	K1	0.7077	cytochrome P450, family 707, subfamily A, polypeptide 2	cytochrome P450, family 707, subfamily A, polypeptide 2 (CYP707A2); FUNCTIONS IN: oxygen binding, (+)-abscisic acid 8'-hydroxylase activity; INVOLVED IN: in 7 processes; LOCATED IN: endomembrane system; EXPRESSED IN: 22 plant structures; EXPRESSED DURING: 6 growth stages; CONTAINS InterPro DOMAIN/s: Cytochrome P450 (InterPro:IPR001128), Cytochrome P450, E-class, group I (InterPro:IPR002401), Cyto…	Cytochrome P450 | Cytochrome P450, E-class, group I | Cytochrome P450, conserved site	NO
AT2G29200	4	2:12553192-12553276	-	RI	0.30318	0.047037	0.25615	0.991	K2	1.2666	pumilio 1	pumilio 1 (PUM1); FUNCTIONS IN: RNA binding, binding; LOCATED IN: cellular_component unknown; EXPRESSED IN: cultured cell; CONTAINS InterPro DOMAIN/s: Nucleic acid binding NABP (InterPro:IPR012940), Pumilio RNA-binding repeat (InterPro:IPR001313), Armadillo-like helical (InterPro:IPR011989), Armadillo-type fold (InterPro:IPR016024); BEST Arabidopsis thaliana protein match is: pumilio 3 (TAIR:AT2G…	Armadillo-like helical | Armadillo-type fold | Nucleic acid binding NABP | Pumilio RNA-binding repeat	NO
AT2G29525	26	2:12640231-12640530	+	RI	0.20565	0.47439	-0.26874	0.996	K1	0.9918	Arabidopsis Inositol phosphorylceramide synthase 3	Arabidopsis Inositol phosphorylceramide synthase 3 (AtIPCS3); FUNCTIONS IN: inositol phosphoceramide synthase activity; INVOLVED IN: sphingolipid biosynthetic process; LOCATED IN: cellular_component unknown; EXPRESSED IN: 6 plant structures; BEST Arabidopsis thaliana protein match is: Arabidopsis Inositol phosphorylceramide synthase 1 (TAIR:AT3G54020.1)	Sphingomyelin synthase-like domain	NO
AT2G29910	5	2:12752974-12753056	-	AD	0.55725	0.87375	-0.3165	0.989	K2	1.5421	F-box/RNI-like superfamily protein	F-box/RNI-like superfamily protein; CONTAINS InterPro DOMAIN/s: F-box domain, cyclin-like (InterPro:IPR001810), F-box domain, Skp2-like (InterPro:IPR022364), Leucine-rich repeat 2 (InterPro:IPR013101); BEST Arabidopsis thaliana protein match is: F-box/RNI-like superfamily protein (TAIR:AT2G29930.3)	F-box domain | Leucine-rich repeat 2	NO
AT2G29910	6	2:12752840-12752973	-	RI	0.41499	0.12612	0.28887	0.978	K2	1.5421	F-box/RNI-like superfamily protein	F-box/RNI-like superfamily protein; CONTAINS InterPro DOMAIN/s: F-box domain, cyclin-like (InterPro:IPR001810), F-box domain, Skp2-like (InterPro:IPR022364), Leucine-rich repeat 2 (InterPro:IPR013101); BEST Arabidopsis thaliana protein match is: F-box/RNI-like superfamily protein (TAIR:AT2G29930.3)	F-box domain | Leucine-rich repeat 2	NO
AT2G30420	2	2:12961728-12961830	-	RI	0.11355	0.52506	-0.41151	1	K1	1	Homeodomain-like superfamily protein	ENHANCER OF TRY AND CPC 2 (ETC2); FUNCTIONS IN: DNA binding, sequence-specific DNA binding transcription factor activity; INVOLVED IN: trichome patterning, regulation of transcription; LOCATED IN: mitochondrion; CONTAINS InterPro DOMAIN/s: SANT, DNA-binding (InterPro:IPR001005), Myb, DNA-binding (InterPro:IPR014778), Homeodomain-related (InterPro:IPR012287), Myb transcription factor (InterPro:IPR…	Homeodomain-like | SANT/Myb domain	NO
AT2G30480	6	2:12992971-12993160	-	RI	0.92978	0.6022	0.32758	0.987	K1	0.9799		unknown protein; FUNCTIONS IN: molecular_function unknown; INVOLVED IN: biological_process unknown; LOCATED IN: cellular_component unknown; EXPRESSED IN: 12 plant structures; EXPRESSED DURING: 4 anthesis, F mature embryo stage, petal differentiation and expansion stage, E expanded cotyledon stage, D bilateral stage		NO
AT2G30600	11	2:13037250-13037284	+	AD	0.79727	0.088367	0.7089	1	K2	1.597	BTB/POZ domain-containing protein	BTB/POZ domain-containing protein; INVOLVED IN: cell adhesion; LOCATED IN: cellular_component unknown; EXPRESSED IN: 24 plant structures; EXPRESSED DURING: 13 growth stages; CONTAINS InterPro DOMAIN/s: Coagulation factor 5/8 type, C-terminal (InterPro:IPR000421), Farnesoic acid 0-methyl transferase (InterPro:IPR022041), BTB/POZ (InterPro:IPR013069), BTB/Kelch-associated (InterPro:IPR011705), BTB/…	BTB/Kelch-associated | BTB/POZ | BTB/POZ fold | BTB/POZ-like | Coagulation factor 5/8 C-terminal type domain | Farnesoic acid O-methyl transferase | Galactose-binding domain-like	NO
AT2G30600	13	2:13037285-13037381	+	RI	0.72399	0.13208	0.59191	1	K3	1.7523	BTB/POZ domain-containing protein	BTB/POZ domain-containing protein; INVOLVED IN: cell adhesion; LOCATED IN: cellular_component unknown; EXPRESSED IN: 24 plant structures; EXPRESSED DURING: 13 growth stages; CONTAINS InterPro DOMAIN/s: Coagulation factor 5/8 type, C-terminal (InterPro:IPR000421), Farnesoic acid 0-methyl transferase (InterPro:IPR022041), BTB/POZ (InterPro:IPR013069), BTB/Kelch-associated (InterPro:IPR011705), BTB/…	BTB/Kelch-associated | BTB/POZ | BTB/POZ fold | BTB/POZ-like | Coagulation factor 5/8 C-terminal type domain | Farnesoic acid O-methyl transferase | Galactose-binding domain-like	NO
AT2G30600	26	2:13039014-13039145	+	RI	0.061013	0.23734	-0.17633	0.999	K3	2.2372	BTB/POZ domain-containing protein	BTB/POZ domain-containing protein; INVOLVED IN: cell adhesion; LOCATED IN: cellular_component unknown; EXPRESSED IN: 24 plant structures; EXPRESSED DURING: 13 growth stages; CONTAINS InterPro DOMAIN/s: Coagulation factor 5/8 type, C-terminal (InterPro:IPR000421), Farnesoic acid 0-methyl transferase (InterPro:IPR022041), BTB/POZ (InterPro:IPR013069), BTB/Kelch-associated (InterPro:IPR011705), BTB/…	BTB/Kelch-associated | BTB/POZ | BTB/POZ fold | BTB/POZ-like | Coagulation factor 5/8 C-terminal type domain | Farnesoic acid O-methyl transferase | Galactose-binding domain-like	NO
AT2G30695	6	2:13081132-13081295	-	RI	0.076325	0.24458	-0.16826	1	K4	1.0018		FUNCTIONS IN: molecular_function unknown; INVOLVED IN: protein folding, protein transport; LOCATED IN: chloroplast; LOCATED IN: chloroplast stroma, chloroplast; EXPRESSED IN: 23 plant structures; EXPRESSED DURING: 13 growth stages; CONTAINS InterPro DOMAIN/s: Trigger factor, ribosome-binding, bacterial (InterPro:IPR008881)	Trigger factor, ribosome-binding, bacterial	NO
AT2G30970	5	2:13178906-13178977	+	RI	0.56951	0.93375	-0.36424	0.994	K2	1.7362	aspartate aminotransferase 1	aspartate aminotransferase 1 (ASP1); FUNCTIONS IN: L-aspartate:2-oxoglutarate aminotransferase activity, copper ion binding; INVOLVED IN: response to cadmium ion; LOCATED IN: mitochondrion; EXPRESSED IN: 23 plant structures; EXPRESSED DURING: 13 growth stages; EXPRESSED IN: 25 plant structures; CONTAINS InterPro DOMAIN/s: Aminotransferase, class I/classII (InterPro:IPR004839), Pyridoxal phosphate…	Aminotransferase, class I/classII | Aminotransferases, class-I, pyridoxal-phosphate-binding site | Aspartate/other aminotransferase | Pyridoxal phosphate-dependent transferase | Pyridoxal phosphate-dependent transferase, major region, subdomain 1	NO
AT2G31130	7	2:13266176-13266294	-	RI	0.56454	0.051393	0.51314	1	K3	1.3698		unknown protein		NO
AT2G31130	8	2:13266074-13266175	-	CE	0.56668	0.094724	0.47196	0.995	K3	1.3392		unknown protein		NO
AT2G31130	9	2:13265571-13266073	-	RI	0.53658	0.11443	0.42215	0.996	K3	1.3698		unknown protein		NO
AT2G31900	28	2:13567800-13567808	-	RI	0.53207	0.2614	0.27067	0.9	K1	0.976	myosin-like protein XIF	myosin-like protein XIF (XIF); CONTAINS InterPro DOMAIN/s: Dil domain (InterPro:IPR018444), Dilute (InterPro:IPR002710), Myosin, N-terminal, SH3-like (InterPro:IPR004009), Myosin head, motor domain (InterPro:IPR001609), IQ calmodulin-binding region (InterPro:IPR000048); BEST Arabidopsis thaliana protein match is: Myosin family protein with Dil domain (TAIR:AT5G20490.1)	Dil domain | Dilute | IQ motif, EF-hand binding site | Myosin head, motor domain | Myosin, N-terminal, SH3-like | P-loop containing nucleoside triphosphate hydrolase	NO
AT2G31900	4	2:13569270-13569338	-	AA	0.79588	0.53413	0.26176	0.931	K1	0.9995	myosin-like protein XIF	myosin-like protein XIF (XIF); CONTAINS InterPro DOMAIN/s: Dil domain (InterPro:IPR018444), Dilute (InterPro:IPR002710), Myosin, N-terminal, SH3-like (InterPro:IPR004009), Myosin head, motor domain (InterPro:IPR001609), IQ calmodulin-binding region (InterPro:IPR000048); BEST Arabidopsis thaliana protein match is: Myosin family protein with Dil domain (TAIR:AT5G20490.1)	Dil domain | Dilute | IQ motif, EF-hand binding site | Myosin head, motor domain | Myosin, N-terminal, SH3-like | P-loop containing nucleoside triphosphate hydrolase	NO
AT2G31900	5	2:13569339-13569402	-	RI	0.61789	0.79417	-0.17628	0.986	K2	1.1534	myosin-like protein XIF	myosin-like protein XIF (XIF); CONTAINS InterPro DOMAIN/s: Dil domain (InterPro:IPR018444), Dilute (InterPro:IPR002710), Myosin, N-terminal, SH3-like (InterPro:IPR004009), Myosin head, motor domain (InterPro:IPR001609), IQ calmodulin-binding region (InterPro:IPR000048); BEST Arabidopsis thaliana protein match is: Myosin family protein with Dil domain (TAIR:AT5G20490.1)	Dil domain | Dilute | IQ motif, EF-hand binding site | Myosin head, motor domain | Myosin, N-terminal, SH3-like | P-loop containing nucleoside triphosphate hydrolase	NO
AT2G31955	4	2:13586522-13586588	-	RI	0.71681	0.46855	0.24826	0.996	K2	1.5171	cofactor of nitrate reductase and xanthine dehydrogenase 2	cofactor of nitrate reductase and xanthine dehydrogenase 2 (CNX2); CONTAINS InterPro DOMAIN/s: Aldolase-type TIM barrel (InterPro:IPR013785), Molybdenum cofactor synthesis C-terminal (InterPro:IPR010505), Elongator protein 3/MiaB/NifB (InterPro:IPR006638), Molybdenum cofactor biosynthesis protein A (InterPro:IPR013483), Radical SAM (InterPro:IPR007197), MoaA/nifB/pqqE, iron-sulphur binding, conse…	Aldolase-type TIM barrel | Elongator protein 3/MiaB/NifB | MoaA/nifB/pqqE, iron-sulphur binding, conserved site | Molybdenum cofactor biosynthesis protein A | Molybdenum cofactor synthesis C-terminal | Radical SAM	NO
AT2G32150	16	2:13660250-13660342	+	RI	0.091367	0.21125	-0.11989	0.972	K1	0.8728	Haloacid dehalogenase-like hydrolase (HAD) superfamily protein	Haloacid dehalogenase-like hydrolase (HAD) superfamily protein; FUNCTIONS IN: hydrolase activity, catalytic activity; INVOLVED IN: metabolic process; LOCATED IN: cellular_component unknown; EXPRESSED IN: 24 plant structures; EXPRESSED DURING: 13 growth stages; CONTAINS InterPro DOMAIN/s: Haloacid dehalogenase-like hydrolase (InterPro:IPR005834), Pyrimidine 5-nucleotidase (InterPro:IPR010237), HAD…	HAD-like domain | Pyrimidine 5-nucleotidase	NO
AT2G32150	4	2:13659129-13659226	+	RI	0.18292	0.0090105	0.17391	1	K1	0.7554	Haloacid dehalogenase-like hydrolase (HAD) superfamily protein	Haloacid dehalogenase-like hydrolase (HAD) superfamily protein; FUNCTIONS IN: hydrolase activity, catalytic activity; INVOLVED IN: metabolic process; LOCATED IN: cellular_component unknown; EXPRESSED IN: 24 plant structures; EXPRESSED DURING: 13 growth stages; CONTAINS InterPro DOMAIN/s: Haloacid dehalogenase-like hydrolase (InterPro:IPR005834), Pyrimidine 5-nucleotidase (InterPro:IPR010237), HAD…	HAD-like domain | Pyrimidine 5-nucleotidase	NO
AT2G32290	5	2:13716343-13716436	-	RI	0.72216	0.92371	-0.20155	0.954	K1	0.9183	beta-amylase 6	beta-amylase 6 (BAM6); FUNCTIONS IN: cation binding, beta-amylase activity, catalytic activity; INVOLVED IN: cellulose biosynthetic process, carbohydrate metabolic process, polysaccharide catabolic process; LOCATED IN: chloroplast; EXPRESSED IN: 14 plant structures; EXPRESSED DURING: 8 growth stages; CONTAINS InterPro DOMAIN/s: Glycoside hydrolase, family 14, conserved site (InterPro:IPR018238), …	Glycoside hydrolase, catalytic domain | Glycoside hydrolase, family 14 | Glycoside hydrolase, family 14, conserved site | Glycoside hydrolase, family 14B, plant | Glycoside hydrolase, superfamily	NO
[truncated: 1,313 more rows]

## Sheet: GO_cbp80_DAS_C
Term Name	GOID	Term Type	Depth	cnt(reference)	cnt(cbp80)	fsh(cbp80)
intracellular	GO:0005622	C	3	8832	529	1.46981e-15
intracellular part	GO:0044424	C	3	8536	505	1.01833e-13
cell part	GO:0044464	C	2	14569	779	2.63865e-12
[truncated: 56 more rows]

## Sheet: GO_cbp80_DAS_F
Term Name	GOID	Term Type	Depth	cnt(reference)	cnt(cbp80)	fsh(cbp80)
[truncated: 244 more rows]

[truncated: 1 more sheets: GO_cbp80_DAS_P]
